# Supplementary material
Source: PubMed Central journal article supplement (PMC3970850)
Supplement: jp4076299_si_001.pdf [file jp4076299_si_001.pdf]

# A DFT Study of the *Cis*-dihydroxylation of Nitroaromatic Compounds Catalyzed by Nitrobenzene Dioxygenase

*Anna Pabis, Inacrist Geronimo, and Piotr Paneth\**

Institute of Applied Radiation Chemistry, Lodz University of Technology, Zeromskiego 116, 90-924 Lodz, Poland

## **Supporting Information**

Activation barriers for  $\text{Fe}^{\text{III}}\text{-OOH}$  and  $\text{HO-Fe}^{\text{V}}=\text{O}$  attacks on nitrobenzene and 2-nitrotoluene calculated using B3LYP and B3LYP-D functionals. Comparison between the Gibbs free activation energies and Gibbs free reaction energies for the O-O cleavage calculated for the stationary points optimized at B3LYP/LACVP\* level with single-point corrections using B97D, B3LYP-D2 or B3LYP-D3, and the corresponding values calculated for the stationary points reoptimized using a given dispersion-corrected functional. Barriers for the  $\text{Fe}^{\text{V}}$  attacks on nitrobenzene ring calculated for the structures optimized using B97D functional. Activation energies for the formation of an epoxide intermediate for benzene and naphthalene; illustration of the transition state for the epoxide formation and the epoxide intermediate for benzene. Ketone intermediate formed from an epoxide intermediate and a preceding transition state for nitrobenzene. Stationary points along the O-C<sub>2</sub> pathway involving  $\text{HO-Fe}^{\text{IV}}=\text{O}$  species.

Comparison between Mulliken and NBO spin densities calculated for selected species. XYZ coordinates of all stationary points.

**Table S1.** Gibbs free energies of activation ( $\Delta G^\ddagger$ ) for the initial attack of  $\text{Fe}^{\text{III}}\text{-OOH}$  (concerted and non-concerted) or  $\text{HO-Fe}^{\text{V}}=\text{O}$  species on nitrobenzene (NBZ) and 2-nitrotoluene (2-NT) ring calculated at B3LYP/LACV3P+\*//B3LYP/LACVP\* level of theory. In parenthesis barriers for the  $\text{Fe}^{\text{V}}$  attack calculated relative to  $\text{Fe}^{\text{III}}$  reactant complex are given.

|      |        | $\text{Fe}^{\text{III}}$ non-concerted |                          |                          | $\text{Fe}^{\text{III}}$ concerted |                          |                          | $\text{Fe}^{\text{V}}$            |                          |                          |
|------|--------|----------------------------------------|--------------------------|--------------------------|------------------------------------|--------------------------|--------------------------|-----------------------------------|--------------------------|--------------------------|
|      |        | $\text{O}_1\text{-C}_2$<br>attack      | $\text{O-C}_1$<br>attack | $\text{O-C}_2$<br>attack | $\text{O}_1\text{-C}_2$<br>attack  | $\text{O-C}_1$<br>attack | $\text{O-C}_2$<br>attack | $\text{O}_1\text{-C}_2$<br>attack | $\text{O-C}_1$<br>attack | $\text{O-C}_2$<br>attack |
| NBZ  | Model1 | -                                      | 39.1                     | 35.4                     | 36.3                               | 31.2                     | 31.0                     | 13.4 (29.7)                       | 19.1 (34.3)              | 14.4 (30.7)              |
|      | Model2 | -                                      | 40.7                     | 35.5                     | -                                  | 33.6                     | -                        | 9.5 (29.0)                        | 15.3 (34.8)              | 12.6 (32.1)              |
|      | Model3 | 42.1                                   | 37.8                     | 31.6                     | -                                  | -                        | -                        | 15.6 (34.7)                       | 18.0 (37.1)              | 14.8 (33.9)              |
|      | Model4 | 40.8                                   | 39.2                     | 30.3                     | -                                  | -                        | -                        | 15.6 (33.2)                       | 18.3 (36.0)              | 14.4 (32.1)              |
| 2-NT | Model1 | -                                      | -                        | -                        | 37.4                               | 34.0                     | 32.4                     | 9.2                               | 15.3                     | 13.2                     |
|      | Model2 | -                                      | -                        | -                        | -                                  | -                        | -                        | 7.5                               | -                        | -                        |

**Table S2.** Gibbs free energies of activation ( $\Delta G^\ddagger$ ) for the initial attack of  $\text{Fe}^{\text{III}}\text{-OOH}$  (concerted and non-concerted) or  $\text{HO-Fe}^{\text{V}}=\text{O}$  species on nitrobenzene or 2-nitrotoluene (2-NT) ring calculated at B3LYP-D2/LACV3P+\*//B3LYP/LACVP\* level of theory. In parenthesis barriers for the  $\text{Fe}^{\text{V}}$  attack calculated relative to  $\text{Fe}^{\text{III}}$  reactant complex are given.

|     |        | $\text{Fe}^{\text{III}}$ non-concerted |                          |                          | $\text{Fe}^{\text{III}}$ concerted |                          |                          | $\text{Fe}^{\text{V}}$            |                          |                          |
|-----|--------|----------------------------------------|--------------------------|--------------------------|------------------------------------|--------------------------|--------------------------|-----------------------------------|--------------------------|--------------------------|
|     |        | $\text{O}_1\text{-C}_2$<br>attack      | $\text{O-C}_1$<br>attack | $\text{O-C}_2$<br>attack | $\text{O}_1\text{-C}_2$<br>attack  | $\text{O-C}_1$<br>attack | $\text{O-C}_2$<br>attack | $\text{O}_1\text{-C}_2$<br>attack | $\text{O-C}_1$<br>attack | $\text{O-C}_2$<br>attack |
| NBZ | Model1 | -                                      | 37.9                     | 34.8                     | 35.7                               | 24.9                     | 27.3                     | 7.7 (21.2)                        | 13.0 (28.5)              | 9.2 (24.7)               |
|     | Model2 | -                                      | 38.4                     | 33.1                     | -                                  | 26.1                     | -                        | 1.9 (21.0)                        | 7.8 (27.0)               | 4.9 (24.0)               |

|      |        |      |      |      |   |   |   |            |             |            |
|------|--------|------|------|------|---|---|---|------------|-------------|------------|
|      | Model3 | 35.7 | 33.6 | 24.3 | - | - | - | 7.4 (24.3) | 9.1 (25.9)  | 5.3 (22.2) |
|      | Model4 | 36.0 | 35.7 | 27.7 | - | - | - | 7.4 (22.1) | 10.5 (25.2) | 7.7 (22.4) |
| 2-NT | Model1 | -    | -    | -    | - | - | - | 1.1        | 15.8        | 13.9       |
|      | Model2 | -    | -    | -    | - | - | - | 1.2        | -           | -          |

**Table S3.** Gibbs free energies of activation ( $\Delta G^\ddagger$ ) for the initial attack of  $\text{Fe}^{\text{III}}\text{-OOH}$  (concerted and non-concerted) or  $\text{HO-Fe}^{\text{V}}=\text{O}$  species on nitrobenzene or 2-nitrotoluene (2-NT) ring calculated at B3LYP-D3/LACV3P+\*//B3LYP/LACVP\* level of theory. In parenthesis barriers for the  $\text{Fe}^{\text{V}}$  attack calculated relative to  $\text{Fe}^{\text{III}}$  reactant complex are given.

|      |        | $\text{Fe}^{\text{III}}$ non-concerted |                          |                          | $\text{Fe}^{\text{III}}$ concerted |                          |                          | $\text{Fe}^{\text{V}}$            |                          |                          |
|------|--------|----------------------------------------|--------------------------|--------------------------|------------------------------------|--------------------------|--------------------------|-----------------------------------|--------------------------|--------------------------|
|      |        | $\text{O}_1\text{-C}_2$<br>attack      | $\text{O-C}_1$<br>attack | $\text{O-C}_2$<br>attack | $\text{O}_1\text{-C}_2$<br>attack  | $\text{O-C}_1$<br>attack | $\text{O-C}_2$<br>attack | $\text{O}_1\text{-C}_2$<br>attack | $\text{O-C}_1$<br>attack | $\text{O-C}_2$<br>attack |
| NBZ  | Model1 | -                                      | 38.5                     | 35.0                     | 36.0                               | 25.0                     | 27.1                     | 6.4 (23.4)                        | 9.7 (26.8)               | 6.8 (23.9)               |
|      | Model2 | -                                      | 38.4                     | 33.1                     | -                                  | 25.7                     | -                        | 0.2 (20.3)                        | 5.1 (25.1)               | 3.4 (23.4)               |
|      | Model3 | 36.1                                   | 33.2                     | 23.9                     | -                                  | -                        | -                        | 6.1 (23.5)                        | 6.8 (24.2)               | 4.7 (22.1)               |
|      | Model4 | 35.6                                   | 34.7                     | 26.7                     | -                                  | -                        | -                        | 4.7 (19.9)                        | 6.2 (21.4)               | 5.8 (21.0)               |
| 2-NT | Model1 | -                                      | -                        | -                        | -                                  | -                        | -                        | -0.5                              | 8.1                      | 6.2                      |
|      | Model2 | -                                      | -                        | -                        | -                                  | -                        | -                        | -0.3                              | -                        | -                        |

**Table S4.** Comparison between the Gibbs free activation energies ( $\Delta G^\ddagger$ ) and Gibbs free reaction energies ( $\Delta G_r$ ) for the O-O cleavage leading from  $\text{Fe}^{\text{III}}\text{-OOH}$  to  $\text{HO-Fe}^{\text{V}}=\text{O}$  species calculated for the stationary points optimized at B3LYP/LACVP\* level with single-point corrections using B97D, B3LYP-D2 or B3LYP-D3 functional with LACV3P+\* basis set, and the corresponding values calculated for the stationary points reoptimized using a given dispersion-corrected functional. All values calculated for Model 1 with nitrobenzene, and in the absence of the substrate (Model 1').

|          | B97D                |              |                     |              | B3LYP-D2            |              |                     |              | B3LYP-D3            |              |                     |              |
|----------|---------------------|--------------|---------------------|--------------|---------------------|--------------|---------------------|--------------|---------------------|--------------|---------------------|--------------|
|          | SP                  |              | OPT                 |              | SP                  |              | OPT                 |              | SP                  |              | OPT                 |              |
|          | $\Delta G^\ddagger$ | $\Delta G_r$ |
| Model 1' | 16.4                | 7.4          | 18.9                | 5.9          | 26.7                | 17.8         | 26.5                | 16.5         | 28.1                | 19.0         | 28.0                | 17.9         |
| Model 1  | 15.5                | 6.1          | 18.1                | 6.0          | 24.6                | 15.5         | 25.5                | 16.3         | 26.6                | 17.4         | 26.0                | 16.4         |

**Table S5.** Comparison between the Gibbs free energies of activation ( $\Delta G^\ddagger$ ) for the initial attack of HO-Fe<sup>V</sup>=O species on nitrobenzene calculated for the stationary points optimized at B3LYP/LACVP\* level with B97D/LACV3P+\* single-point corrections, and the corresponding values calculated for the stationary points reoptimized at B97D/LACVP\* level and corrected using LACV3P+\* basis set. All values calculated for Model 1.

|                            | $\Delta G^\ddagger$ [kcal/mol]           |                            |                            |
|----------------------------|------------------------------------------|----------------------------|----------------------------|
|                            | O <sub>1</sub> -C <sub>2</sub><br>attack | O-C <sub>1</sub><br>attack | O-C <sub>2</sub><br>attack |
| B97D/LACV3P+*/B3LYP/LACVP* | 7.0                                      | 9.8                        | 6.3                        |
| B97D/LACV3P+*/B97D/LACVP*  | 6.8                                      | 8.5                        | 7.2                        |

**Table S6.** Gas phase activation energies ( $\Delta E^\ddagger$ ) for the epoxide formation through the Fe<sup>III</sup>-OOH attack on benzene and naphthalene, with concomitant O-O cleavage calculated for two models of the NBDO active site, relative to reactant complex. In parenthesis activation energies calculated relative to separate reactants are given. All barriers calculated at the B3LYP/LACV3P+\*/B3LYP/LACVP level.

|         | $\Delta E^\ddagger$ [kcal/mol] |             |
|---------|--------------------------------|-------------|
|         | benzene                        | naphthalene |
| Model 1 | 22.2 (16.7)                    | 20.1 (14.4) |
| Model 2 | 29.8 (12.3)                    | ---         |

**Table S7.** Gibbs free energies of activation ( $\Delta G^\ddagger$ ) for the epoxide formation through the  $\text{Fe}^{\text{III}}$ -OOH attack on benzene and naphthalene, with concomitant O-O cleavage calculated for two models of the NBDO active site, relative to reactant complex. In parenthesis activation energies calculated relative to separate reactants are given. All values calculated at the B97D/LACV3P+\*//B3LYP/LACVP\* level in SMD continuum solvent model ( $\epsilon=5.7$ ).

|         | $\Delta G^\ddagger$ [kcal/mol] |             |
|---------|--------------------------------|-------------|
|         | benzene                        | naphthalene |
| Model 1 | 16.0 (10.8)                    | 13.5 (7.1)  |
| Model 2 | 19.8 (8.2)                     | ---         |

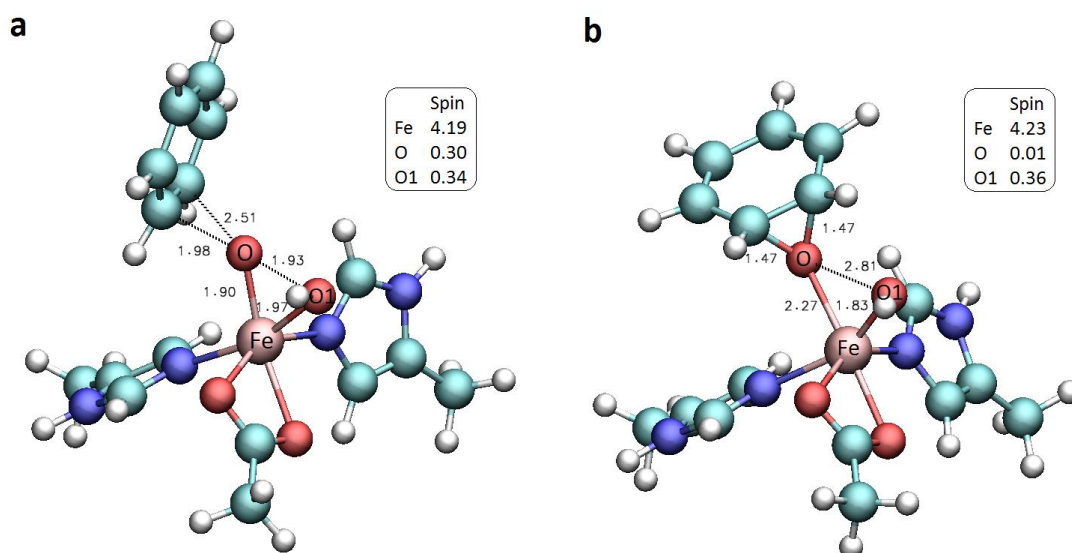

**Figure S1.** Optimized geometries, relevant Mulliken spin populations and bond lengths ( $\text{\AA}$ ) of the transition state yielding the epoxide intermediate (**a**) and the epoxide intermediate (**b**) found for benzene in the smallest model of NBDO active site. Stationary points located at the B3LYP/LACV3P+\*//B3LYP/LACVP\* level in SMD continuum solvent model ( $\epsilon=5.7$ ).

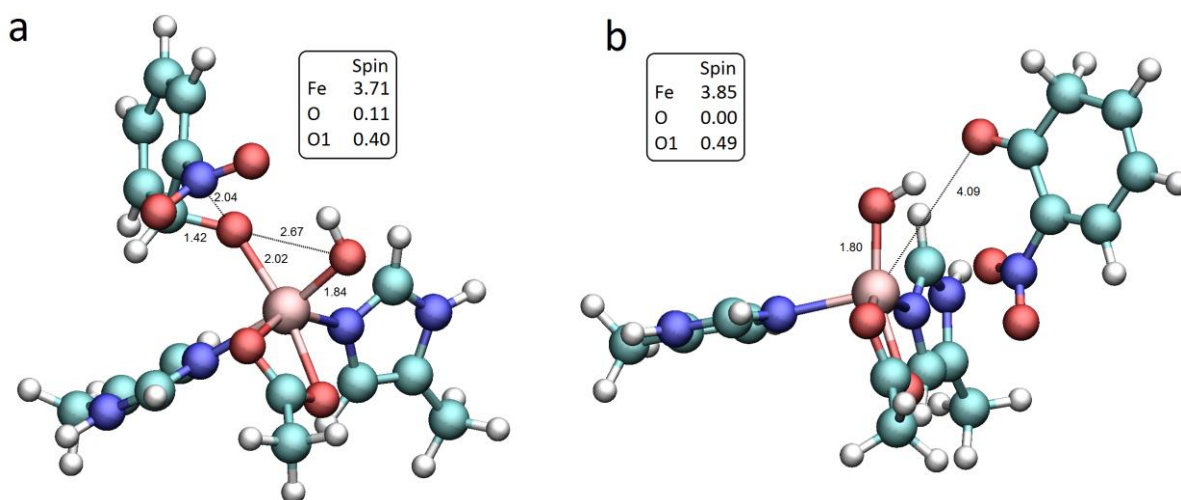

**Figure S2.** Optimized geometries, relevant spin populations (NBO) and bond lengths ( $\text{\AA}$ ) of the transition state associated with the epoxide ring opening (**a**) and a ketone formed as a product of this reaction (**b**) found for nitrobenzene in the smallest model of NBDO active site. Stationary points located at the B97D/LACV3P+\*//B3LYP/LACVP\* level in SMD continuum solvent model ( $\epsilon=5.7$ ).

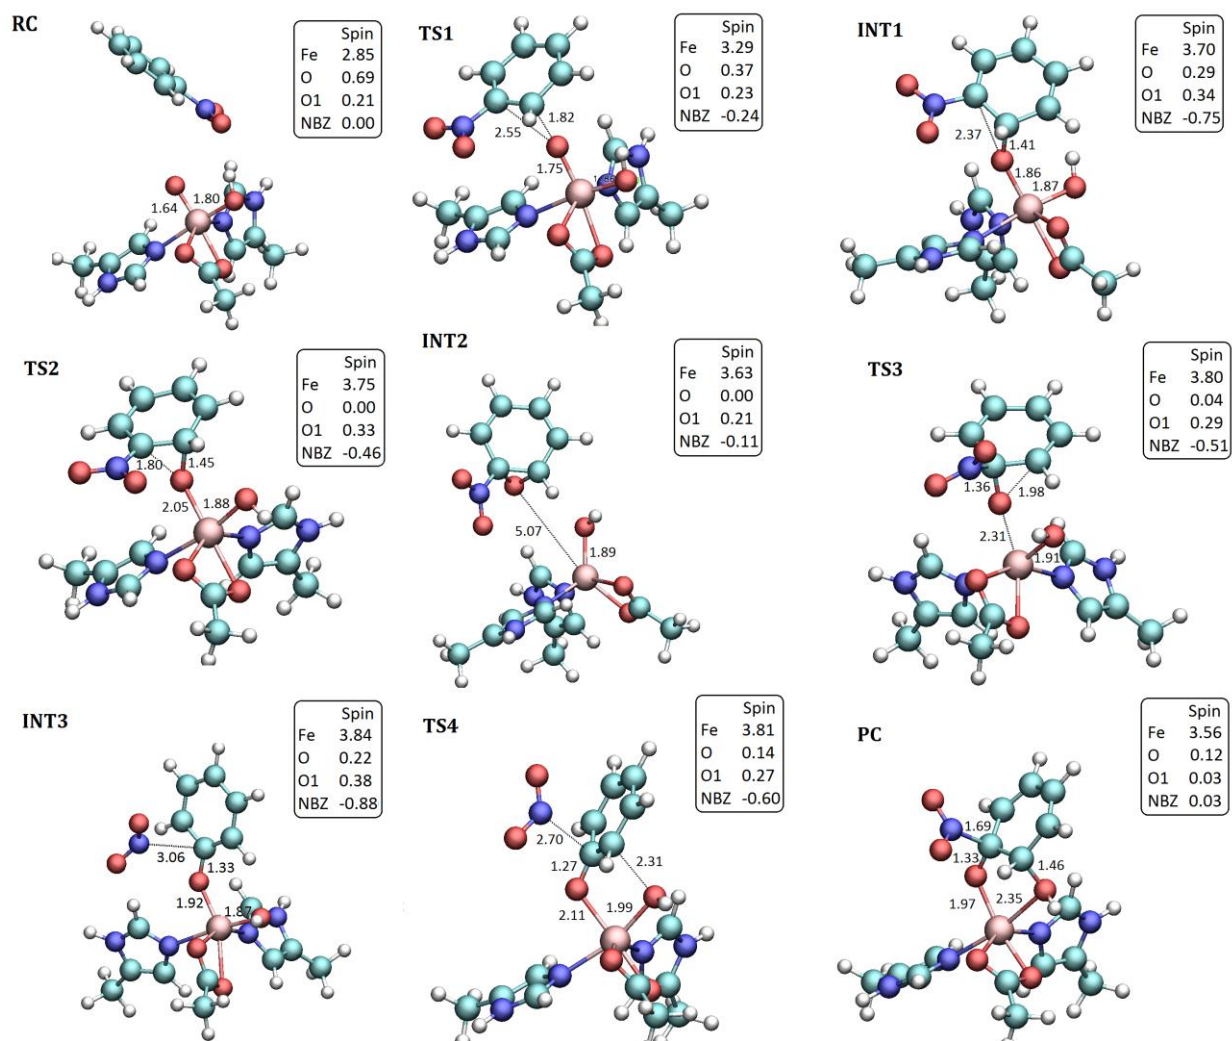

**Figure S3.** Optimized geometries of all stationary points along the O-C<sub>2</sub> pathway involving the HO-Fe<sup>IV</sup>=O complex, calculated for Model 1. Key bond lengths and spin densities are given.

**Table S8.** Comparison of atomic spin densities calculated for the epoxide intermediates in Model 1 and 2 using Mulliken Population Analysis and Natural Bond Analysis. Reported densities are calculated at the B97D/LACV3P+\* level for structures optimized using B3LYP/LACVP\*.

|    | Model 1 |      | Model 2 |      |
|----|---------|------|---------|------|
|    | Mull.   | NBO  | Mull.   | NBO  |
| Fe | 4.03    | 3.86 | 4.04    | 3.88 |
| O  | 0.00    | 0.00 | 0.00    | 0.00 |
| O1 | 0.42    | 0.45 | 0.42    | 0.45 |

**Table S9.** Comparison of atomic spin densities for the structures along the radical *cis*-dihydroxylation pathway of nitrobenzene calculated using Mulliken Population Analysis and Natural Bond Analysis. Reported densities are calculated at the B97D/LACV3P+\* level for structures optimized using B3LYP/LACVP\*.

| <b>Model 1</b> |       |      |       |      |       |      |       |      |       |      |  |
|----------------|-------|------|-------|------|-------|------|-------|------|-------|------|--|
|                | RC    |      | TS1   |      | INT   |      | TS2   |      | PC    |      |  |
|                | Mull. | NBO  |  |
| Fe             | 3.16  | 2.89 | 3.15  | 2.89 | 3.07  | 2.87 | 3.50  | 3.14 | 4.17  | 3.85 |  |
| O              | 1.01  | 1.07 | 0.61  | 0.70 | 0.65  | 0.73 | 0.41  | 0.64 | 0.23  | 0.34 |  |
| O1             | 0.60  | 0.60 | 0.49  | 0.54 | 0.03  | 0.07 | 0.04  | 0.06 | 0.03  | 0.07 |  |
| NBZ            | 0.00  | 0.00 | 0.52  | 0.51 | 1.00  | 0.97 | 0.78  | 0.76 | 0.08  | 0.07 |  |
| <b>Model 2</b> |       |      |       |      |       |      |       |      |       |      |  |
|                | RC    |      | TS1   |      | INT   |      | TS2   |      | PC    |      |  |
|                | Mull. | NBO  |  |
| Fe             | 3.18  | 2.90 | 3.09  | 2.85 | 3.06  | 2.88 | 3.45  | 3.14 | 4.19  | 3.85 |  |
| O              | 1.02  | 1.03 | 0.66  | 0.72 | 0.66  | 0.73 | 0.42  | 0.64 | 0.25  | 0.33 |  |
| O1             | 0.51  | 0.50 | 0.43  | 0.47 | 0.04  | 0.08 | 0.04  | 0.06 | 0.03  | 0.07 |  |
| NBZ            | 0.00  | 0.00 | 0.58  | 0.49 | 1.00  | 0.97 | 0.81  | 0.79 | 0.06  | 0.07 |  |



XYZ coordinates of stationary points

*Epoxide pathway*

*Nitrobenzene Model 1:*

NBZ-FeIII-RC-modell:

|   |             |             |             |
|---|-------------|-------------|-------------|
| C | -2.11593600 | -1.23575200 | 4.33813500  |
| N | -2.72207100 | -0.89143800 | 3.13828200  |
| H | -3.72178800 | -0.86982300 | 2.96830000  |
| C | -1.77557100 | -0.60679000 | 2.22778100  |
| H | -1.96974000 | -0.31991000 | 1.20584100  |
| N | -0.57140700 | -0.74678200 | 2.77743900  |
| C | -0.77161300 | -1.14149800 | 4.09131400  |
| H | 0.05762100  | -1.34014400 | 4.75275800  |
| C | 1.13853500  | 3.63359900  | 3.34462900  |
| N | 1.74139200  | 3.81972100  | 2.10778000  |
| H | 2.03664400  | 4.71093600  | 1.72322000  |
| C | 1.87220800  | 2.63720400  | 1.48748900  |
| H | 2.29130400  | 2.50140200  | 0.49918800  |
| N | 1.37625800  | 1.67285800  | 2.26547800  |
| C | 0.91683400  | 2.28549500  | 3.42488600  |
| H | 0.46016300  | 1.71910000  | 4.22207000  |
| C | 3.26632200  | -1.52389200 | 2.50592600  |
| O | 2.19811400  | -1.60504600 | 3.19536800  |
| O | 3.22644800  | -0.78982700 | 1.45663700  |
| C | 3.07281100  | -0.72547700 | -2.88242100 |
| C | 3.05754500  | -1.83697000 | -3.72281200 |
| C | 2.04577200  | -1.98289000 | -4.67805700 |
| C | 1.04118400  | -1.01729000 | -4.79844400 |
| C | 1.03647200  | 0.09738000  | -3.96254600 |
| C | 2.05704600  | 0.22417800  | -3.01881600 |
| N | 2.05677900  | 1.38642200  | -2.13060900 |
| O | 1.10484800  | 2.16447100  | -2.17826800 |
| O | 3.02313400  | 1.53419200  | -1.37165300 |
| H | 3.84874400  | -0.58652400 | -2.13942600 |
| H | 3.83801800  | -2.58656300 | -3.63420400 |
| H | 2.04251900  | -2.85015600 | -5.33187700 |
| H | 0.25951500  | -1.13211200 | -5.54293500 |
| H | 0.26609600  | 0.85529200  | -4.03496300 |
| O | 0.60610600  | -0.47254500 | 0.05211400  |
| O | 0.87012100  | -1.89687100 | 0.10895200  |
| H | 1.72455600  | -1.95537400 | -0.36963000 |
| H | 5.33129400  | -1.53776100 | 3.02707300  |
| H | 4.36837800  | -2.83309700 | 3.80073300  |
| H | 4.80618600  | -2.92431700 | 2.06815400  |

|    |             |             |            |
|----|-------------|-------------|------------|
| Fe | 1.22225100  | -0.32789000 | 1.82020500 |
| C  | 4.51604600  | -2.25594800 | 2.88653900 |
| C  | 0.84391200  | 4.75725200  | 4.27997300 |
| H  | 1.75756700  | 5.29218400  | 4.56565700 |
| H  | 0.15876700  | 5.48419400  | 3.82705500 |
| H  | 0.37719400  | 4.37156100  | 5.19002000 |
| H  | -3.55712900 | -0.80413700 | 5.87492900 |
| H  | -3.50061200 | -2.50493700 | 5.38378400 |
| H  | -2.20069900 | -1.82804800 | 6.37944100 |
| C  | -2.88737300 | -1.61223800 | 5.55664100 |

NBZ-FeIII-O-C1-concerted-TS1-model1:

|    |             |             |             |
|----|-------------|-------------|-------------|
| C  | -3.73081900 | 2.23058000  | 0.15109700  |
| N  | -2.69353800 | 3.12070800  | -0.09182700 |
| H  | -2.77704900 | 4.13099200  | -0.11034000 |
| C  | -1.56294700 | 2.43022400  | -0.32295500 |
| H  | -0.60987200 | 2.87475900  | -0.56252100 |
| N  | -1.80965700 | 1.12620600  | -0.24022900 |
| C  | -3.15711400 | 0.99061300  | 0.05282600  |
| H  | -3.61768300 | 0.02027800  | 0.15561500  |
| C  | -0.34197200 | -1.72582600 | 3.25813900  |
| N  | 0.16455000  | -2.81357100 | 2.56260900  |
| H  | 0.47495600  | -3.68557400 | 2.97728600  |
| C  | 0.18357500  | -2.53090700 | 1.24800000  |
| H  | 0.54157000  | -3.19694300 | 0.47925400  |
| N  | -0.28598400 | -1.30235000 | 1.04360500  |
| C  | -0.61827200 | -0.79366700 | 2.29217200  |
| H  | -1.03708300 | 0.19452800  | 2.40643500  |
| C  | -1.36261300 | -2.41381800 | -1.94141900 |
| O  | -2.16452900 | -1.51343500 | -1.54916400 |
| O  | -0.10826100 | -2.23356600 | -1.72759100 |
| C  | 2.72156500  | 3.28449600  | 0.99591800  |
| C  | 3.31260700  | 3.14735000  | -0.27920300 |
| C  | 3.40151600  | 1.90925500  | -0.87316000 |
| C  | 2.82370600  | 0.78109900  | -0.21290800 |
| H  | 2.67631300  | 4.26569500  | 1.45916200  |
| H  | 3.71974800  | 4.01817100  | -0.78258000 |
| H  | 3.86828700  | 1.76869000  | -1.84015900 |
| O  | 1.16012700  | 0.67334400  | -1.04688100 |
| O  | -0.08374200 | 0.52332700  | -2.55456000 |
| H  | 0.54217900  | -0.02671800 | -3.06395900 |
| Fe | -0.46961400 | -0.36433000 | -0.84261100 |
| C  | -5.12953100 | 2.66656900  | 0.42898500  |
| H  | -5.18795500 | 3.29205000  | 1.32825800  |
| H  | -5.54337300 | 3.24371000  | -0.40675900 |
| H  | -5.76565700 | 1.79102800  | 0.58339300  |
| C  | -0.49286900 | -1.71345200 | 4.74210100  |

|   |             |             |             |
|---|-------------|-------------|-------------|
| H | -1.16132500 | -2.51223600 | 5.08545400  |
| H | 0.47236800  | -1.84870000 | 5.24524700  |
| H | -0.91357800 | -0.75781800 | 5.06616300  |
| C | -1.84000100 | -3.65014300 | -2.64359600 |
| H | -1.46441900 | -3.64757900 | -3.67358500 |
| H | -1.43415100 | -4.53945400 | -2.14982000 |
| H | -2.93059500 | -3.69340100 | -2.65565000 |
| C | 2.22250600  | 2.17305700  | 1.67905300  |
| H | 1.79622700  | 2.28390200  | 2.67073500  |
| C | 2.31135000  | 0.90919600  | 1.10752500  |
| H | 1.98951100  | 0.02267400  | 1.63539900  |
| N | 3.27623100  | -0.56586700 | -0.66079800 |
| O | 3.75096600  | -0.65490400 | -1.78757300 |
| O | 3.14121500  | -1.50090400 | 0.12475600  |

NBZ-FeIII-O-C1-concerted-INT1-modell (epoxide):

|    |             |             |             |
|----|-------------|-------------|-------------|
| C  | 1.76942600  | 3.27993400  | -1.66285400 |
| N  | 0.40070400  | 3.06949900  | -1.76893600 |
| H  | -0.22293100 | 3.55625900  | -2.40381700 |
| C  | 0.02424100  | 2.11433600  | -0.90451400 |
| H  | -0.98141900 | 1.73414600  | -0.80233700 |
| N  | 1.09164000  | 1.68457800  | -0.23002000 |
| C  | 2.18258200  | 2.40802300  | -0.69125800 |
| H  | 3.17296700  | 2.24981500  | -0.29275000 |
| C  | 3.21623100  | -2.62782800 | -1.53548000 |
| N  | 1.89983500  | -3.04613600 | -1.67921000 |
| H  | 1.57725600  | -3.76931500 | -2.31337300 |
| C  | 1.11356800  | -2.34471700 | -0.84901000 |
| H  | 0.04174100  | -2.45546400 | -0.77777300 |
| N  | 1.85728000  | -1.47939300 | -0.15859100 |
| C  | 3.17010000  | -1.65038700 | -0.57714100 |
| H  | 3.97527800  | -1.06487900 | -0.16029200 |
| C  | 2.50248100  | 0.40290900  | 3.00392300  |
| O  | 3.02587800  | 0.56775500  | 1.85950200  |
| O  | 1.26493100  | 0.05116500  | 3.03699100  |
| C  | -6.01057000 | 0.12688800  | 0.96159500  |
| C  | -5.04675100 | -0.74684100 | 1.60608100  |
| C  | -3.87430500 | -1.08493000 | 1.02165400  |
| C  | -3.49571700 | -0.40307000 | -0.22179500 |
| H  | -6.96716000 | 0.27858600  | 1.45355300  |
| H  | -5.32328000 | -1.20414100 | 2.55168100  |
| H  | -3.21507600 | -1.84139900 | 1.42929200  |
| O  | -3.32260400 | 0.98055700  | -0.23795900 |
| O  | -0.67824200 | -0.35332800 | 1.03648400  |
| H  | -1.10403400 | -0.35352700 | 1.91179900  |
| Fe | 1.10319400  | 0.03839400  | 0.98999200  |
| C  | 2.50327500  | 4.26530200  | -2.50880200 |
| H  | 2.41287800  | 4.02243500  | -3.57449700 |
| H  | 2.12110500  | 5.28311500  | -2.36469400 |

|   |             |             |             |
|---|-------------|-------------|-------------|
| H | 3.56495000  | 4.26094700  | -2.24855900 |
| C | 4.33534400  | -3.20005500 | -2.33875100 |
| H | 4.45211200  | -4.27532700 | -2.15695900 |
| H | 4.16780700  | -3.05772200 | -3.41305600 |
| H | 5.27398600  | -2.70692700 | -2.07269500 |
| C | 3.25683200  | 0.59787600  | 4.28552200  |
| H | 2.74679900  | 1.35107500  | 4.89615600  |
| H | 3.25535000  | -0.33986400 | 4.85240400  |
| H | 4.28404400  | 0.91026700  | 4.08997300  |
| C | -5.79646500 | 0.64736100  | -0.27074100 |
| H | -6.58547100 | 1.15669800  | -0.81585300 |
| C | -4.49891500 | 0.48335300  | -0.93198800 |
| H | -4.42455900 | 0.59218200  | -2.01108100 |
| N | -2.50997600 | -1.12867300 | -1.09526200 |
| O | -2.38743300 | -2.33563100 | -0.89773800 |
| O | -1.92626600 | -0.48967500 | -1.96120700 |

NBZ-FeIII-O-C1-concerted-TS2-modell1:

|    |             |             |             |
|----|-------------|-------------|-------------|
| C  | -4.20925500 | -0.61383900 | -1.75507300 |
| N  | -3.46148300 | -1.54135900 | -2.46474600 |
| H  | -3.81094000 | -2.12952000 | -3.21252900 |
| C  | -2.20555200 | -1.55941000 | -1.97980200 |
| H  | -1.42882500 | -2.22651500 | -2.31718900 |
| N  | -2.08757000 | -0.67788700 | -0.99280300 |
| C  | -3.33051900 | -0.08289200 | -0.84521300 |
| H  | -3.51083600 | 0.66758000  | -0.09044700 |
| C  | -0.55661300 | 3.68760700  | 0.54596400  |
| N  | -0.08116400 | 3.34174100  | 1.79858800  |
| H  | 0.18484300  | 3.99211000  | 2.52923300  |
| C  | -0.03412900 | 1.99637400  | 1.89587400  |
| H  | 0.31762400  | 1.46142100  | 2.76315200  |
| N  | -0.45808500 | 1.43765800  | 0.76847000  |
| C  | -0.78652100 | 2.48527300  | -0.07951000 |
| H  | -1.17105100 | 2.30593300  | -1.07289800 |
| C  | -0.87861600 | -1.12472000 | 2.79131300  |
| O  | -1.81674100 | -1.09391600 | 1.92987100  |
| O  | 0.31210000  | -0.89242700 | 2.40043600  |
| C  | 3.16577400  | 1.24875000  | -2.85664300 |
| C  | 3.96805300  | 0.06463900  | -2.85214700 |
| C  | 3.98703400  | -0.83293000 | -1.78587800 |
| C  | 3.23717700  | -0.49912500 | -0.67453200 |
| H  | 3.19914200  | 1.89914900  | -3.72404600 |
| H  | 4.56823900  | -0.16038600 | -3.72962200 |
| H  | 4.56327900  | -1.74994600 | -1.82607400 |
| O  | 1.20644200  | -0.30906300 | -0.72627100 |
| O  | -0.10054100 | -2.53264300 | -0.03864100 |
| H  | 0.84540400  | -2.70509400 | -0.18539700 |
| Fe | -0.43085600 | -0.76638900 | 0.36272900  |
| C  | -5.66215300 | -0.39215800 | -2.01488500 |

|   |             |             |             |
|---|-------------|-------------|-------------|
| H | -5.84722300 | -0.07728700 | -3.04929600 |
| H | -6.24230400 | -1.30588000 | -1.83611600 |
| H | -6.04698400 | 0.38585800  | -1.34997700 |
| C | -0.71396700 | 5.10891900  | 0.11478600  |
| H | -1.43167700 | 5.64477200  | 0.74806500  |
| H | 0.23846800  | 5.65121100  | 0.16155800  |
| H | -1.07803500 | 5.15078700  | -0.91554600 |
| C | -1.18168600 | -1.44534400 | 4.22808500  |
| H | -2.08008600 | -0.91132900 | 4.55202500  |
| H | -1.38571600 | -2.51961700 | 4.31606100  |
| H | -0.33755700 | -1.19379500 | 4.87400800  |
| C | 2.36354800  | 1.53262400  | -1.79800700 |
| H | 1.73031600  | 2.41451300  | -1.78951000 |
| C | 2.27598200  | 0.62240900  | -0.60700100 |
| H | 2.28187000  | 1.18152200  | 0.33517700  |
| N | 3.30723000  | -1.35835200 | 0.52017600  |
| O | 3.11892600  | -2.56134400 | 0.36948100  |
| O | 3.58987200  | -0.79048700 | 1.56720700  |

NBZ-FeIII-O-C1-concerted-INT2-model1 (ketone):

|   |             |             |             |
|---|-------------|-------------|-------------|
| C | -2.24181900 | -3.60892200 | 0.56521000  |
| N | -1.81214200 | -3.69331000 | -0.75182500 |
| H | -1.87962800 | -4.51498100 | -1.34203300 |
| C | -1.28631800 | -2.51128600 | -1.12215600 |
| H | -0.87543200 | -2.29944600 | -2.09693300 |
| N | -1.35293200 | -1.65347400 | -0.10792200 |
| C | -1.94187000 | -2.32856100 | 0.94907600  |
| H | -2.09879500 | -1.84784300 | 1.90202200  |
| C | -4.72499900 | 1.61020100  | -0.97142200 |
| N | -4.06798000 | 2.80412200  | -0.71580500 |
| H | -4.48617900 | 3.72714000  | -0.75303800 |
| C | -2.78326100 | 2.54695700  | -0.40802200 |
| H | -2.04689200 | 3.29559100  | -0.16083400 |
| N | -2.56805900 | 1.23608100  | -0.44680600 |
| C | -3.76945800 | 0.64296400  | -0.79907900 |
| H | -3.86731600 | -0.42679200 | -0.89976900 |
| C | -0.22619300 | 1.46004100  | 2.01997400  |
| O | -0.75300600 | 0.30757500  | 2.02048100  |
| O | 0.03490200  | 1.99682400  | 0.88163100  |
| C | 6.44882800  | 0.10241600  | -1.12855800 |
| C | 6.33278900  | 0.09354000  | 0.21834300  |
| C | 5.03119700  | 0.06307700  | 0.82153800  |
| C | 3.87553700  | 0.02850300  | 0.09177500  |
| H | 7.42727300  | 0.10997200  | -1.60159600 |
| H | 7.20290300  | 0.09660900  | 0.86561700  |
| H | 4.95500700  | 0.04939200  | 1.90467500  |
| O | 2.88260300  | 0.14853800  | -2.09487200 |
| O | 0.06105100  | 0.42180300  | -1.77097700 |
| H | 1.03124900  | 0.28664500  | -1.84940700 |

|    |             |             |             |
|----|-------------|-------------|-------------|
| Fe | -0.69889200 | 0.33984500  | -0.13869400 |
| C  | -2.88031500 | -4.74763800 | 1.28575800  |
| H  | -3.79483200 | -5.08218100 | 0.78086100  |
| H  | -2.20552900 | -5.60943700 | 1.35757600  |
| H  | -3.14621500 | -4.44219100 | 2.30126300  |
| C  | -6.16708700 | 1.53778400  | -1.34706400 |
| H  | -6.80873100 | 1.96908200  | -0.56906200 |
| H  | -6.36666600 | 2.07804500  | -2.28058300 |
| H  | -6.46192700 | 0.49472800  | -1.49010200 |
| C  | 0.04939100  | 2.20284100  | 3.29423100  |
| H  | 0.25353500  | 1.50239600  | 4.10718700  |
| H  | 0.88593300  | 2.89346700  | 3.16621900  |
| H  | -0.84039100 | 2.78798700  | 3.56066700  |
| C  | 5.26090200  | 0.09859600  | -2.02468000 |
| H  | 5.31956100  | -0.76313300 | -2.70829800 |
| C  | 3.87897800  | 0.08190900  | -1.38219900 |
| H  | 5.30070000  | 0.97137400  | -2.69400300 |
| N  | 2.62597100  | -0.03915200 | 0.82658200  |
| O  | 1.65625000  | -0.56210300 | 0.25115900  |
| O  | 2.58841700  | 0.39651400  | 1.97504400  |

***Nitrobenzene Model 2:***

NBZ-FeIII-RC-model2:

|   |             |             |             |
|---|-------------|-------------|-------------|
| C | -2.12962700 | -1.26313600 | 4.32162200  |
| N | -2.73799400 | -1.05846200 | 3.09057400  |
| H | -3.73246200 | -1.13470400 | 2.90612800  |
| C | -1.80126300 | -0.75898800 | 2.17516000  |
| H | -1.99977400 | -0.55994500 | 1.13368100  |
| N | -0.60081800 | -0.75564500 | 2.75175500  |
| C | -0.79432600 | -1.07308700 | 4.08744700  |
| H | 0.03314200  | -1.14959600 | 4.77629800  |
| C | 1.29899000  | 3.54574000  | 3.54124000  |
| N | 2.55007900  | 3.44462900  | 2.94852500  |
| H | 3.26126200  | 4.16823400  | 2.94814200  |
| C | 2.67767000  | 2.23831500  | 2.37549400  |
| H | 3.55331400  | 1.89202000  | 1.84895500  |
| N | 1.55982200  | 1.53635900  | 2.56468600  |
| C | 0.69420000  | 2.34452800  | 3.28896400  |
| H | -0.28718300 | 2.00661400  | 3.58296100  |
| C | -0.36525000 | 5.89828200  | -2.99099000 |
| H | -1.19820500 | 5.64100600  | -2.32224400 |
| H | -0.40918500 | 5.17146100  | -3.81323800 |
| C | 0.93942600  | 5.68123600  | -2.22297400 |
| O | 1.72324700  | 6.59285100  | -1.96460000 |
| N | 1.15563600  | 4.39773300  | -1.81936500 |
| H | 2.04632400  | 4.17969400  | -1.39155200 |
| H | 0.57990500  | 3.62234600  | -2.13167000 |
| C | 3.25770300  | -1.56287700 | 2.46492900  |

|    |             |             |             |
|----|-------------|-------------|-------------|
| O  | 2.14521200  | -1.78263500 | 3.04614500  |
| O  | 3.25758800  | -0.70584900 | 1.51124700  |
| C  | -3.31140000 | 0.24704900  | -2.17133400 |
| C  | -4.07572900 | -0.84156800 | -2.58404200 |
| C  | -3.59716900 | -1.69896900 | -3.58052900 |
| C  | -2.35173300 | -1.46945800 | -4.17403700 |
| C  | -1.57554900 | -0.38271500 | -3.77748800 |
| C  | -2.07001900 | 0.45586600  | -2.77680400 |
| N  | -1.26546900 | 1.59891200  | -2.34911500 |
| O  | -0.21798500 | 1.83574600  | -2.96412500 |
| O  | -1.66624000 | 2.28043400  | -1.40513600 |
| H  | -3.66388000 | 0.92938800  | -1.40752100 |
| H  | -5.04645700 | -1.01754800 | -2.13083300 |
| H  | -4.19796200 | -2.54662500 | -3.89694700 |
| H  | -1.98423600 | -2.13594300 | -4.94798600 |
| H  | -0.60987200 | -0.18437600 | -4.22554000 |
| O  | 0.64602700  | -0.32959200 | 0.04325400  |
| O  | 0.89981800  | -1.75781100 | 0.00836600  |
| H  | 1.76859100  | -1.79387200 | -0.44643400 |
| H  | 5.18024400  | -1.52761900 | 3.36738000  |
| H  | 4.30002500  | -3.06540600 | 3.58578300  |
| H  | 5.03902000  | -2.64484200 | 2.00704100  |
| Fe | 1.20599400  | -0.34766400 | 1.83333400  |
| C  | 4.51604300  | -2.25594700 | 2.88654000  |
| C  | 0.84391200  | 4.75725100  | 4.27997400  |
| H  | 1.50261100  | 4.97763500  | 5.12881500  |
| H  | 0.82765200  | 5.64115600  | 3.63121800  |
| H  | -0.16686700 | 4.60038400  | 4.66532900  |
| C  | -0.52137000 | 7.32214800  | -3.52064200 |
| H  | -3.61315100 | -0.83263400 | 5.81809100  |
| H  | -3.43748300 | -2.55353100 | 5.43773400  |
| H  | -2.19569400 | -1.72769300 | 6.39521600  |
| H  | -0.49338200 | 8.05234800  | -2.70563400 |
| H  | 0.28321800  | 7.57653300  | -4.21857700 |
| H  | -1.47625600 | 7.43164100  | -4.04710400 |
| C  | -2.88737100 | -1.61223800 | 5.55663900  |

NBZ-FeIII-O-C1-concerted-TS-model2:

|   |             |             |             |
|---|-------------|-------------|-------------|
| C | -4.97999900 | 1.77479700  | 0.87001400  |
| N | -4.12860700 | 2.70686200  | 0.29333500  |
| H | -4.31226700 | 3.70133400  | 0.21909300  |
| C | -3.03497900 | 2.07986600  | -0.17296800 |
| H | -2.21197000 | 2.55990600  | -0.67789900 |
| N | -3.12579400 | 0.77609800  | 0.07661700  |
| C | -4.33607600 | 0.57402300  | 0.72158200  |
| H | -4.66029200 | -0.41165100 | 1.01842800  |
| C | -0.20851500 | -1.34607200 | 3.30695300  |
| N | 0.20274000  | -2.46941500 | 2.60402300  |
| H | 0.75883900  | -3.22928600 | 2.98097500  |

|    |             |             |             |
|----|-------------|-------------|-------------|
| C  | -0.25414600 | -2.39913600 | 1.34140200  |
| H  | -0.07903200 | -3.14269600 | 0.58030000  |
| N  | -0.95278300 | -1.27836500 | 1.17514800  |
| C  | -0.93292600 | -0.61709000 | 2.39780700  |
| H  | -1.44169700 | 0.32433000  | 2.53922400  |
| C  | 5.99330100  | 0.70575800  | 0.35456100  |
| H  | 5.12899400  | 0.60995400  | 1.02376600  |
| H  | 5.63008500  | 1.23396300  | -0.53918800 |
| C  | 6.44425600  | -0.68456100 | -0.09601600 |
| O  | 7.62518000  | -0.97537900 | -0.26840800 |
| N  | 5.43732600  | -1.58452000 | -0.29276800 |
| H  | 5.67215600  | -2.46624500 | -0.73166800 |
| H  | 4.46016600  | -1.31517200 | -0.28761700 |
| C  | -2.65158600 | -2.81741600 | -1.51032900 |
| O  | -1.39443300 | -2.55746800 | -1.49679200 |
| O  | -3.43033100 | -1.98489000 | -0.94946000 |
| C  | -3.18353700 | -4.02846200 | -2.22994500 |
| H  | -3.37540500 | -3.75176200 | -3.27447900 |
| H  | -2.44970700 | -4.83815100 | -2.22026000 |
| H  | -4.12499100 | -4.35772000 | -1.78400100 |
| C  | 0.14938200  | -1.11024200 | 4.74025300  |
| H  | 1.23634300  | -1.06682700 | 4.87803400  |
| H  | -0.27616800 | -0.16231900 | 5.07977700  |
| H  | -0.23725500 | -1.90762900 | 5.38616600  |
| C  | -6.29001700 | 2.15287500  | 1.47455000  |
| H  | -6.95472900 | 2.61217500  | 0.73286500  |
| H  | -6.78845800 | 1.26414900  | 1.87046400  |
| H  | -6.16294800 | 2.86707500  | 2.29730100  |
| C  | 7.11292300  | 1.50942400  | 1.01701300  |
| H  | 6.76429800  | 2.51613200  | 1.27346000  |
| H  | 7.45770000  | 1.02484800  | 1.93723400  |
| H  | 7.97349200  | 1.60105400  | 0.34837000  |
| Fe | -1.76699000 | -0.63428400 | -0.66553100 |
| C  | 0.81106000  | 3.93223900  | -0.34795700 |
| C  | 1.20544300  | 3.54342600  | -1.64748300 |
| C  | 1.48465400  | 2.22497800  | -1.92112000 |
| C  | 1.29633500  | 1.24769500  | -0.89175100 |
| H  | 0.61364400  | 4.98034500  | -0.14295100 |
| H  | 1.31159200  | 4.29130900  | -2.42650800 |
| H  | 1.81141700  | 1.89790200  | -2.90066100 |
| O  | -0.39389900 | 0.61523800  | -1.29775400 |
| O  | -1.81767400 | 0.03297500  | -2.51548900 |
| H  | -1.20488300 | -0.50072900 | -3.05738000 |
| C  | 0.70234300  | 2.99360100  | 0.68190800  |
| H  | 0.42670700  | 3.30785100  | 1.68330000  |
| C  | 0.99211100  | 1.65710300  | 0.43750600  |
| H  | 0.97391300  | 0.91946000  | 1.22794900  |
| N  | 2.02840000  | -0.03332200 | -1.07267200 |
| O  | 2.22997700  | -0.42041700 | -2.21526600 |
| O  | 2.41281300  | -0.61611000 | -0.05332300 |



NBZ-FeIII-O-C1-concerted-INT1-model2 (epoxide):

|    |             |             |             |
|----|-------------|-------------|-------------|
| C  | 2.87919500  | -3.66730800 | 0.38759000  |
| N  | 1.55929900  | -3.38092100 | 0.07329500  |
| H  | 0.78305100  | -4.03071900 | 0.13702100  |
| C  | 1.46561700  | -2.10512000 | -0.33811800 |
| H  | 0.54002200  | -1.62548300 | -0.61728000 |
| N  | 2.66875600  | -1.53634200 | -0.30944500 |
| C  | 3.55772700  | -2.50233600 | 0.13786000  |
| H  | 4.61172600  | -2.29196300 | 0.23607000  |
| C  | 0.64544800  | 1.53083400  | 2.58878800  |
| N  | -0.03245800 | 2.17595200  | 1.56087600  |
| H  | -0.89127600 | 2.74530200  | 1.59880600  |
| C  | 0.61873800  | 1.95176000  | 0.40781000  |
| H  | 0.30316600  | 2.33804800  | -0.54892400 |
| N  | 1.68563100  | 1.18486700  | 0.62402300  |
| C  | 1.71306100  | 0.92267800  | 1.98306200  |
| H  | 2.48506300  | 0.31334300  | 2.43011300  |
| C  | -3.65627300 | 5.43291800  | -0.22323700 |
| H  | -2.79362100 | 6.05834300  | -0.48217300 |
| H  | -4.05661600 | 5.85614800  | 0.70703600  |
| C  | -3.08353900 | 4.06706700  | 0.15343300  |
| O  | -2.15884700 | 3.99153000  | 0.98011100  |
| N  | -3.62302700 | 2.98059900  | -0.43286400 |
| H  | -3.29981300 | 2.04901800  | -0.18923900 |
| H  | -4.38366700 | 3.05228000  | -1.09362700 |
| C  | 5.38844400  | 1.25539500  | -0.72295800 |
| O  | 4.39356300  | 2.00925200  | -0.43104200 |
| O  | 5.13165200  | 0.03566100  | -0.98808500 |
| C  | 6.77978900  | 1.80653600  | -0.78661200 |
| H  | 7.00980400  | 2.05102900  | -1.83154900 |
| H  | 6.86281600  | 2.71684900  | -0.18932600 |
| H  | 7.50134100  | 1.05748000  | -0.45011600 |
| C  | 0.23463000  | 1.53750500  | 4.02406300  |
| H  | -0.76482400 | 1.10671200  | 4.16119100  |
| H  | 0.94424400  | 0.94799300  | 4.61050900  |
| H  | 0.21410500  | 2.55462900  | 4.43372700  |
| C  | 3.31236800  | -5.00582500 | 0.88469300  |
| H  | 3.10695900  | -5.79274700 | 0.14873600  |
| H  | 4.38750300  | -4.99973600 | 1.08265400  |
| H  | 2.79670400  | -5.27490700 | 1.81437900  |
| C  | -4.71506300 | 5.50139300  | -1.33295900 |
| H  | -5.01706700 | 6.54163100  | -1.49273700 |
| H  | -4.32970700 | 5.11911400  | -2.28561700 |
| H  | -5.61736500 | 4.93460400  | -1.07340600 |
| Fe | 3.05457300  | 0.46616700  | -0.75251400 |
| C  | -4.66326900 | -4.70742400 | -0.01595900 |
| C  | -4.74374200 | -4.07433700 | -1.31966600 |
| C  | -4.33338400 | -2.80289500 | -1.53246000 |

|   |             |             |             |
|---|-------------|-------------|-------------|
| C | -3.61874000 | -2.11681800 | -0.44956000 |
| H | -5.10313800 | -5.69423400 | 0.09713300  |
| H | -5.22902200 | -4.61929700 | -2.12403400 |
| H | -4.51459900 | -2.28058900 | -2.46441200 |
| O | -2.41232300 | -2.62460800 | 0.03144800  |
| O | 2.34144800  | 0.80740000  | -2.37864700 |
| H | 2.60524900  | 1.62720900  | -2.83353400 |
| C | -4.17441800 | -4.05984000 | 1.06919700  |
| H | -4.27720300 | -4.47056000 | 2.06910900  |
| C | -3.54731400 | -2.74311900 | 0.92981500  |
| H | -3.46594400 | -2.08859700 | 1.79398300  |
| N | -3.65098000 | -0.61324100 | -0.49451600 |
| O | -4.56831100 | -0.09767300 | -1.12328500 |
| O | -2.78130700 | 0.00043600  | 0.12232300  |

*Separate reactants*

NBZ:

|   |             |             |             |
|---|-------------|-------------|-------------|
| C | -0.80365900 | -0.98769400 | -4.50633000 |
| C | -0.80374200 | -2.30492600 | -4.96046900 |
| C | 0.23486000  | -3.17132200 | -4.60476300 |
| C | 1.28135500  | -2.72436600 | -3.79175500 |
| C | 1.29684400  | -1.41022900 | -3.32875400 |
| C | 0.25042200  | -0.56294700 | -3.69609300 |
| N | 0.25635500  | 0.82233800  | -3.21106400 |
| O | 1.19216200  | 1.18158500  | -2.49358900 |
| O | -0.67528400 | 1.55744300  | -3.54484000 |
| H | -1.59666300 | -0.29829000 | -4.76821900 |
| H | -1.61501900 | -2.65409800 | -5.59194800 |
| H | 0.22871300  | -4.19713700 | -4.96181600 |
| H | 2.08672900  | -3.39861200 | -3.51688700 |
| H | 2.09627500  | -1.04218100 | -2.69755000 |

Asn:

|   |             |             |             |
|---|-------------|-------------|-------------|
| C | -1.81499100 | -7.27773200 | -1.71162500 |
| H | -1.68398200 | -8.31713400 | -1.38527000 |
| H | -2.18867700 | -7.32682400 | -2.74474700 |
| C | -0.45600100 | -6.58032500 | -1.75758900 |
| O | -0.30781700 | -5.38859500 | -1.49969200 |
| N | 0.58783200  | -7.38380800 | -2.11198400 |
| H | 1.48742500  | -6.95787400 | -2.29585800 |
| H | 0.44182200  | -8.32989300 | -2.43681900 |
| C | -2.82454600 | -6.54964400 | -0.82630600 |
| H | -2.93985400 | -5.50941200 | -1.14446200 |
| H | -3.80371400 | -7.03862100 | -0.87758100 |
| H | -2.50336400 | -6.54327800 | 0.22145300  |

FeIII+ligands:

|    |             |             |             |
|----|-------------|-------------|-------------|
| C  | -3.25191100 | -2.16702600 | 3.90329700  |
| N  | -3.91643000 | -1.66920100 | 2.79058800  |
| H  | -4.92266500 | -1.58447000 | 2.69424900  |
| C  | -3.01908100 | -1.33182500 | 1.84999000  |
| H  | -3.26573500 | -0.93071800 | 0.87907900  |
| N  | -1.78957100 | -1.58301900 | 2.29729200  |
| C  | -1.92472800 | -2.10638000 | 3.57425500  |
| H  | -1.06645700 | -2.41005700 | 4.15375500  |
| C  | 0.87967800  | 2.41542300  | 3.11601100  |
| N  | 2.03594800  | 2.14163700  | 2.39816600  |
| H  | 2.85236000  | 2.74168700  | 2.34473800  |
| C  | 1.90894900  | 0.95803800  | 1.77930800  |
| H  | 2.66251400  | 0.50138000  | 1.15683400  |
| N  | 0.71470300  | 0.43574900  | 2.05963100  |
| C  | 0.06543100  | 1.33822300  | 2.89136800  |
| H  | -0.92790600 | 1.14987700  | 3.26859700  |
| C  | 1.82456500  | -2.92911900 | 1.47171300  |
| O  | 1.89036400  | -1.95950800 | 0.63756700  |
| O  | 0.76813800  | -3.01331700 | 2.18042400  |
| O  | -0.73395100 | -0.95762200 | -0.44082400 |
| O  | -0.71236100 | -2.38532300 | -0.69412200 |
| H  | 0.09916200  | -2.47740400 | -1.23784000 |
| C  | 2.91940800  | -3.94326900 | 1.58060300  |
| H  | 2.80492700  | -4.67070400 | 0.76671700  |
| H  | 3.89595800  | -3.46535700 | 1.46548600  |
| H  | 2.86110100  | -4.47404200 | 2.53300800  |
| C  | 0.69649400  | 3.66069000  | 3.91437100  |
| H  | 0.77135600  | 4.55458500  | 3.28365200  |
| H  | -0.28974200 | 3.65885900  | 4.38545000  |
| H  | 1.45167000  | 3.74474700  | 4.70511300  |
| C  | -3.95660500 | -2.63619800 | 5.12946700  |
| H  | -4.64561100 | -3.45954200 | 4.90553000  |
| H  | -3.22801100 | -2.99413200 | 5.86157800  |
| H  | -4.53870600 | -1.83035000 | 5.59283700  |
| Fe | -0.02324500 | -1.30621600 | 1.26007500  |

***Nitrobenzene Model 1 GAS:***

**NBZ-FeIII-RC-model1-GAS:**

|   |             |             |             |
|---|-------------|-------------|-------------|
| C | -5.17690500 | -1.63505100 | -0.32375100 |
| N | -4.70957500 | -1.72212700 | -1.64417200 |
| H | -5.25319400 | -2.03152200 | -2.43618200 |
| C | -3.40201800 | -1.35380200 | -1.68560000 |
| H | -2.77546100 | -1.34276100 | -2.56081300 |
| N | -3.00647500 | -1.02638100 | -0.44792900 |
| C | -4.09701700 | -1.20466700 | 0.40944100  |
| H | -4.00303500 | -1.04560100 | 1.46941000  |
| C | -2.16396700 | 3.72966200  | -0.05555500 |

|    |             |             |             |
|----|-------------|-------------|-------------|
| N  | -0.76167800 | 3.75016500  | -0.06172800 |
| H  | -0.19107000 | 4.58200200  | -0.08846300 |
| C  | -0.28904800 | 2.47546900  | -0.03072800 |
| H  | 0.74895400  | 2.18653600  | -0.03212700 |
| N  | -1.32857000 | 1.63169900  | -0.00618500 |
| C  | -2.49835600 | 2.39792400  | -0.02335500 |
| H  | -3.47350700 | 1.94385500  | -0.00657300 |
| C  | -0.25781100 | -0.78236700 | 2.37630500  |
| O  | -1.45261900 | -1.15473600 | 2.02274800  |
| O  | 0.47033900  | -0.22876400 | 1.44253700  |
| C  | 7.40298800  | -0.11433900 | -0.07634300 |
| C  | 6.78639500  | -1.37270100 | -0.13411200 |
| C  | 5.40731100  | -1.47071100 | -0.31772800 |
| C  | 4.66524000  | -0.28814700 | -0.43998400 |
| H  | 8.47604100  | -0.04631400 | 0.06510900  |
| H  | 7.37906100  | -2.27483000 | -0.03799600 |
| H  | 4.90889600  | -2.42916800 | -0.36862000 |
| O  | -0.38351600 | -0.72949800 | -1.73490600 |
| O  | 0.06108000  | -1.97628300 | -0.97015900 |
| H  | 1.05670600  | -1.82030000 | -0.88549300 |
| Fe | -1.10528100 | -0.41455100 | 0.03027100  |
| C  | -6.57606200 | -1.96723700 | 0.06888500  |
| H  | -7.30657400 | -1.32315100 | -0.43562900 |
| H  | -6.82916500 | -3.00833000 | -0.16507600 |
| H  | -6.70256000 | -1.83224300 | 1.14559000  |
| C  | -3.00274100 | 4.96198400  | -0.07682800 |
| H  | -2.81578200 | 5.59833200  | 0.79656000  |
| H  | -2.82157600 | 5.56399600  | -0.97543000 |
| H  | -4.06150700 | 4.69268100  | -0.06790800 |
| C  | 0.26390300  | -1.00246500 | 3.75389600  |
| H  | 0.69918000  | -2.00783100 | 3.81897700  |
| H  | 1.04408400  | -0.27728700 | 3.99096700  |
| H  | -0.54849500 | -0.94504300 | 4.48121300  |
| C  | 6.64138000  | 1.05709900  | -0.20234700 |
| H  | 7.12301400  | 2.02698700  | -0.15958300 |
| C  | 5.26160500  | 0.97882200  | -0.38591800 |
| H  | 4.65287300  | 1.86682900  | -0.48966300 |
| N  | 3.22938900  | -0.37397100 | -0.63455800 |
| O  | 2.71208800  | -1.54076500 | -0.69905500 |
| O  | 2.55255500  | 0.68366700  | -0.73878900 |

NBZ-FeIII-O-C1-concerted-TS-modell-GAS:

|   |             |            |             |
|---|-------------|------------|-------------|
| C | -3.66961500 | 2.36225100 | 0.29659900  |
| N | -2.58788700 | 3.22885400 | 0.07778400  |
| H | -2.63577800 | 4.23649900 | 0.10046100  |
| C | -1.47709900 | 2.49859600 | -0.21010400 |
| H | -0.50831500 | 2.89688100 | -0.45549800 |
| N | -1.79322300 | 1.19870800 | -0.17767400 |
| C | -3.15361400 | 1.09918400 | 0.12974300  |

|    |             |             |             |
|----|-------------|-------------|-------------|
| H  | -3.65001100 | 0.14536700  | 0.16223300  |
| C  | -0.37943900 | -1.87695700 | 3.17157500  |
| N  | 0.23041000  | -2.88633100 | 2.41367900  |
| H  | 0.60379400  | -3.74938700 | 2.78023900  |
| C  | 0.25499400  | -2.51934200 | 1.10560400  |
| H  | 0.67865000  | -3.09573100 | 0.30265400  |
| N  | -0.31036800 | -1.31108900 | 0.97868800  |
| C  | -0.70947200 | -0.90260900 | 2.25956000  |
| H  | -1.21311200 | 0.03408400  | 2.42095000  |
| C  | -1.53207100 | -2.31313400 | -2.01488300 |
| O  | -2.28911700 | -1.37608600 | -1.53359900 |
| O  | -0.24647800 | -2.18693500 | -1.79052200 |
| C  | 3.09678200  | 3.24332600  | 0.86396100  |
| C  | 3.64936200  | 2.95914500  | -0.40866200 |
| C  | 3.57334800  | 1.68501100  | -0.93088300 |
| C  | 2.86339000  | 0.67538800  | -0.20366900 |
| H  | 3.18574500  | 4.24487000  | 1.27133700  |
| H  | 4.15837700  | 3.74000400  | -0.96130500 |
| H  | 4.00906700  | 1.42313500  | -1.88619000 |
| O  | 1.17614500  | 0.73111400  | -0.95316200 |
| O  | -0.09030900 | 0.64315200  | -2.49315100 |
| H  | 0.58833600  | 0.26483700  | -3.09377500 |
| Fe | -0.53120900 | -0.30218700 | -0.83627000 |
| C  | -5.04385800 | 2.84092900  | 0.62274600  |
| H  | -5.06802800 | 3.41450300  | 1.55732600  |
| H  | -5.45239200 | 3.47653200  | -0.17207300 |
| H  | -5.71665600 | 1.98818600  | 0.73964400  |
| C  | -0.57977600 | -1.97149700 | 4.64750700  |
| H  | -1.21750400 | -2.82187500 | 4.91728200  |
| H  | 0.37087500  | -2.08397300 | 5.18251700  |
| H  | -1.06446000 | -1.06538100 | 5.01877100  |
| C  | -2.07563400 | -3.44622700 | -2.81584500 |
| H  | -2.07280100 | -3.16969200 | -3.87792800 |
| H  | -1.45070800 | -4.33395500 | -2.70026100 |
| H  | -3.10610800 | -3.65902400 | -2.52562900 |
| C  | 2.47272000  | 2.24084500  | 1.61541500  |
| H  | 2.08486900  | 2.46076900  | 2.60322700  |
| C  | 2.38977200  | 0.94148400  | 1.11577700  |
| H  | 1.97178900  | 0.13009400  | 1.69356100  |
| N  | 3.14969000  | -0.73694300 | -0.57895500 |
| O  | 3.55053800  | -0.95493300 | -1.74786800 |
| O  | 2.95131100  | -1.62764400 | 0.29382300  |

NBZ-FeIII-O-C1-concerted-INT1-model1-GAS (epoxide):

|   |             |            |             |
|---|-------------|------------|-------------|
| C | 1.39077000  | 3.15755300 | -1.93624700 |
| N | 0.01043200  | 2.94347700 | -1.79689000 |
| H | -0.70705200 | 3.38847200 | -2.34932200 |
| C | -0.21806300 | 2.04266600 | -0.80875700 |
| H | -1.18970400 | 1.67840000 | -0.51418400 |

|    |             |             |             |
|----|-------------|-------------|-------------|
| N  | 0.96396500  | 1.66118100  | -0.29692300 |
| C  | 1.97126800  | 2.35420000  | -0.98445800 |
| H  | 3.00961500  | 2.22333900  | -0.73395500 |
| C  | 3.03376900  | -2.70239200 | -1.57150700 |
| N  | 1.71707000  | -3.17966700 | -1.48372300 |
| H  | 1.34423200  | -3.96379700 | -1.99831700 |
| C  | 1.01320000  | -2.42382300 | -0.60482200 |
| H  | -0.03057000 | -2.56025000 | -0.37240300 |
| N  | 1.82117400  | -1.46922900 | -0.11545600 |
| C  | 3.08368800  | -1.63789600 | -0.70344200 |
| H  | 3.90706600  | -0.99333500 | -0.44914800 |
| C  | 2.92407800  | 0.69087600  | 2.76572800  |
| O  | 3.28711400  | 0.70018700  | 1.52326800  |
| O  | 1.66433700  | 0.37732500  | 2.98681000  |
| C  | -6.05118100 | 0.16261300  | 0.88075900  |
| C  | -5.14745600 | -0.65156100 | 1.67754800  |
| C  | -3.92570900 | -1.02934000 | 1.22474900  |
| C  | -3.44005700 | -0.46407100 | -0.03432700 |
| H  | -7.04273000 | 0.35633300  | 1.27526300  |
| H  | -5.50536200 | -1.02807000 | 2.62955700  |
| H  | -3.30397300 | -1.74415100 | 1.74648000  |
| O  | -3.21490700 | 0.97229000  | -0.14219500 |
| O  | -0.55533500 | -0.32062300 | 1.34130300  |
| H  | -1.00032300 | -0.31369200 | 2.20942000  |
| Fe | 1.18816700  | 0.11145900  | 1.00342400  |
| C  | 1.96352300  | 4.07494400  | -2.96597400 |
| H  | 1.70808100  | 3.75177600  | -3.98234800 |
| H  | 1.60641600  | 5.10405800  | -2.83984000 |
| H  | 3.05306000  | 4.09224700  | -2.88759400 |
| C  | 4.05120800  | -3.30901800 | -2.48054500 |
| H  | 4.23094200  | -4.36478500 | -2.24502100 |
| H  | 3.74338000  | -3.24592700 | -3.53119800 |
| H  | 5.00319000  | -2.78231800 | -2.38151600 |
| C  | 3.83152600  | 1.00373200  | 3.90853800  |
| H  | 3.42436400  | 1.84305600  | 4.48218600  |
| H  | 3.87879600  | 0.14408600  | 4.58560200  |
| H  | 4.83156900  | 1.24888900  | 3.55091500  |
| C  | -5.72633000 | 0.58093100  | -0.37077100 |
| H  | -6.45782600 | 1.05576300  | -1.01491500 |
| C  | -4.38546000 | 0.35445700  | -0.90296900 |
| H  | -4.20860900 | 0.38121200  | -1.97194700 |
| N  | -2.38666000 | -1.25235800 | -0.74762900 |
| O  | -2.21065200 | -2.44272200 | -0.37191600 |
| O  | -1.75573000 | -0.70099300 | -1.68394800 |

***Nitrobenzene Model 2 GAS:***

**NBZ-FeIII-RC-model2-GAS:**

|   |            |             |             |
|---|------------|-------------|-------------|
| C | 5.08817600 | -1.48820000 | -1.87957400 |
|---|------------|-------------|-------------|

|    |             |             |             |
|----|-------------|-------------|-------------|
| N  | 4.10511900  | -1.30948900 | -2.86410500 |
| H  | 4.21618300  | -1.52413100 | -3.84392600 |
| C  | 2.98773500  | -0.78528300 | -2.29750200 |
| H  | 2.08267900  | -0.52420800 | -2.81764700 |
| N  | 3.20344700  | -0.62192700 | -0.98510200 |
| C  | 4.50804900  | -1.04806500 | -0.71285100 |
| H  | 4.92204500  | -0.98060900 | 0.27809500  |
| C  | 0.25717300  | -3.66678900 | 1.44343600  |
| N  | -0.88485700 | -2.98322600 | 0.99280900  |
| H  | -1.85732700 | -3.30962800 | 0.86116900  |
| C  | -0.54415300 | -1.71870500 | 0.66872600  |
| H  | -1.23003300 | -0.97191600 | 0.30605800  |
| N  | 0.77730400  | -1.53693500 | 0.88109100  |
| C  | 1.28125000  | -2.75055400 | 1.36788600  |
| H  | 2.31929300  | -2.87378200 | 1.62481800  |
| C  | -5.75738500 | -3.36510500 | -0.70244100 |
| H  | -6.10350300 | -4.01240200 | 0.11414600  |
| H  | -5.35543000 | -4.04503500 | -1.46380900 |
| C  | -4.56596400 | -2.58505200 | -0.15509600 |
| O  | -3.53599600 | -3.19748900 | 0.25915700  |
| N  | -4.65595000 | -1.23958900 | -0.12948100 |
| H  | -3.89720400 | -0.66703300 | 0.22308400  |
| H  | -5.45972600 | -0.74777600 | -0.48556900 |
| C  | 2.55264600  | 1.58631600  | 2.21070200  |
| O  | 1.34241200  | 1.65434900  | 1.72238600  |
| O  | 3.32294500  | 0.68582100  | 1.67014600  |
| C  | 3.02827400  | 2.51053500  | 3.28073900  |
| H  | 3.65662000  | 3.29102800  | 2.83382100  |
| H  | 2.18418200  | 2.98003900  | 3.78672800  |
| H  | 3.64696400  | 1.96717000  | 3.99952500  |
| C  | 0.28166000  | -5.09447800 | 1.89521700  |
| H  | -0.04607200 | -5.77526300 | 1.10107800  |
| H  | 1.29754800  | -5.37407700 | 2.18369700  |
| H  | -0.37212900 | -5.25562900 | 2.76008300  |
| C  | 6.43641500  | -2.05232200 | -2.17924600 |
| H  | 6.98076600  | -1.44081000 | -2.90881200 |
| H  | 7.03696900  | -2.08980000 | -1.26741300 |
| H  | 6.37176500  | -3.07246800 | -2.57658800 |
| C  | -6.93928100 | -2.55673800 | -1.27650300 |
| H  | -7.71023300 | -3.24005800 | -1.64455700 |
| H  | -7.40730300 | -1.92126800 | -0.51528600 |
| H  | -6.63107700 | -1.92771200 | -2.11998200 |
| Fe | 1.78377500  | 0.11434500  | 0.30192200  |
| C  | -0.92171800 | 5.48773100  | -0.35408800 |
| C  | -0.44038900 | 4.43861500  | 0.44624300  |
| C  | -1.14865600 | 3.23686400  | 0.53608500  |
| C  | -2.33657700 | 3.11236800  | -0.19505700 |
| H  | -0.36966900 | 6.41949100  | -0.41314800 |
| H  | 0.47090100  | 4.55785300  | 1.02169700  |
| H  | -0.78930400 | 2.42835100  | 1.15799800  |

|   |             |            |             |
|---|-------------|------------|-------------|
| O | 0.60715900  | 0.77401400 | -1.06016000 |
| O | 1.50951300  | 1.98508400 | -1.21979300 |
| H | 0.92784000  | 2.70912200 | -0.87627100 |
| C | -2.11844800 | 5.34048800 | -1.06908100 |
| H | -2.49068000 | 6.15238800 | -1.68277400 |
| C | -2.83891500 | 4.14685600 | -0.99310600 |
| H | -3.76458800 | 4.00802000 | -1.53591200 |
| N | -3.07736000 | 1.86351300 | -0.12700200 |
| O | -2.57033900 | 0.88948900 | 0.52306700  |
| O | -4.19330800 | 1.77996100 | -0.71163700 |

NBZ-FeIII-O-C1-concerted-TS-model2-GAS:

|   |             |             |             |
|---|-------------|-------------|-------------|
| C | -4.83479700 | 2.21614500  | 0.50530500  |
| N | -3.91328300 | 3.00592100  | -0.19955600 |
| H | -4.04733500 | 3.97453900  | -0.44804800 |
| C | -2.83146600 | 2.25017800  | -0.53006500 |
| H | -1.98336000 | 2.58255100  | -1.10263000 |
| N | -3.00897500 | 1.00908400  | -0.06225400 |
| C | -4.25225000 | 0.97210100  | 0.57821800  |
| H | -4.63757600 | 0.05976400  | 0.99835100  |
| C | -0.28770900 | -0.76682400 | 3.45013400  |
| N | 0.10394100  | -1.99992700 | 2.90786100  |
| H | 0.65749000  | -2.69780200 | 3.38179100  |
| C | -0.36339200 | -2.10471400 | 1.63523800  |
| H | -0.19050300 | -2.93128600 | 0.96879000  |
| N | -1.04396300 | -0.99422200 | 1.32495800  |
| C | -1.00829300 | -0.15750500 | 2.44960100  |
| H | -1.50049600 | 0.79893600  | 2.45399800  |
| C | 6.88969900  | 0.03026000  | -0.02120400 |
| H | 7.16647800  | 0.22846300  | -1.06621800 |
| H | 7.49388200  | -0.82372400 | 0.30800100  |
| C | 5.41028100  | -0.33142400 | -0.01333200 |
| O | 4.51080200  | 0.53669600  | -0.16708800 |
| N | 5.11326500  | -1.65130400 | 0.14820100  |
| H | 4.14550600  | -1.94799200 | 0.12126800  |
| H | 5.83246000  | -2.34981100 | 0.24443000  |
| C | -2.81006100 | -2.83733900 | -1.11267300 |
| O | -1.51324100 | -2.62648700 | -1.09982000 |
| O | -3.54864500 | -1.85605500 | -0.70245700 |
| C | -3.38615400 | -4.11445500 | -1.63632700 |
| H | -3.50752400 | -4.03153200 | -2.72374000 |
| H | -2.71234300 | -4.95020400 | -1.43717400 |
| H | -4.36824700 | -4.29721400 | -1.19703000 |
| C | 0.08321000  | -0.32333900 | 4.82888100  |
| H | 1.17064200  | -0.26270300 | 4.95708500  |
| H | -0.33123600 | 0.66808300  | 5.02672800  |
| H | -0.30707100 | -1.00364300 | 5.59524300  |
| C | -6.14123900 | 2.74287300  | 1.00355100  |
| H | -6.77072900 | 3.10797200  | 0.18321500  |



|    |             |             |             |
|----|-------------|-------------|-------------|
| H  | -6.69239300 | 1.94895400  | 1.51291400  |
| H  | -6.00624800 | 3.56523700  | 1.71655000  |
| C  | 7.20296700  | 1.27160900  | 0.83122100  |
| H  | 8.25009600  | 1.56549500  | 0.71118400  |
| H  | 6.56621500  | 2.10653200  | 0.52529100  |
| H  | 7.02307400  | 1.07813700  | 1.89460400  |
| Fe | -1.76671700 | -0.57253800 | -0.59141000 |
| C  | 1.76426800  | 3.41213100  | -0.59461300 |
| C  | 2.02608600  | 2.87732700  | -1.87715500 |
| C  | 2.00853200  | 1.51276200  | -2.07574400 |
| C  | 1.65033400  | 0.65793900  | -0.98770300 |
| H  | 1.80950900  | 4.48605000  | -0.44613100 |
| H  | 2.27281800  | 3.53990000  | -2.69818700 |
| H  | 2.23831600  | 1.06456100  | -3.03272000 |
| O  | -0.21072900 | 0.41621600  | -1.33379400 |
| O  | -1.77087300 | -0.04704300 | -2.48150100 |
| H  | -1.19686200 | -0.53225400 | -3.11281400 |
| C  | 1.48858700  | 2.57293800  | 0.49150800  |
| H  | 1.33219900  | 2.99206400  | 1.47851900  |
| C  | 1.47470500  | 1.19163100  | 0.31850300  |
| H  | 1.34316400  | 0.51307400  | 1.14701400  |
| N  | 1.98996800  | -0.77144400 | -1.12280300 |
| O  | 2.20052800  | -1.22080900 | -2.27366100 |
| O  | 2.04443300  | -1.47585200 | -0.06899700 |

NBZ-FeIII-O-C1-concerted-INT1-model2-GAS (epoxide):

|   |             |             |             |
|---|-------------|-------------|-------------|
| C | -2.71379000 | 3.49131300  | 0.16249300  |
| N | -1.36093500 | 3.13966500  | 0.05574100  |
| H | -0.55925100 | 3.74834600  | 0.14599800  |
| C | -1.26243900 | 1.81659400  | -0.22762900 |
| H | -0.33119200 | 1.28854400  | -0.32563600 |
| N | -2.49215500 | 1.29253500  | -0.31278000 |
| C | -3.40639100 | 2.32481300  | -0.07524200 |
| H | -4.46638800 | 2.14116400  | -0.09890400 |
| C | -0.31185800 | -1.45917000 | 2.59777700  |
| N | 0.33946000  | -2.15921700 | 1.57526200  |
| H | 1.23945200  | -2.65816600 | 1.58338800  |
| C | -0.38069200 | -2.04294700 | 0.43719900  |
| H | -0.10461000 | -2.47409200 | -0.50803300 |
| N | -1.47425700 | -1.29653700 | 0.66872900  |
| C | -1.44178100 | -0.93274100 | 2.01702400  |
| H | -2.21230200 | -0.32773100 | 2.46331900  |
| C | 3.96944600  | -5.30915300 | -0.12305100 |
| H | 3.07310800  | -5.93418800 | -0.21646500 |
| H | 4.40234900  | -5.56615200 | 0.85309100  |
| C | 3.46762800  | -3.87437500 | 0.00070100  |
| O | 2.56004700  | -3.59527900 | 0.83449700  |
| N | 4.02542900  | -2.92748000 | -0.79093600 |
| H | 3.72951500  | -1.96052700 | -0.72190200 |

|    |             |             |             |
|----|-------------|-------------|-------------|
| H  | 4.75106700  | -3.15290400 | -1.45240400 |
| C  | -5.16803200 | -1.60224600 | -0.52192100 |
| O  | -4.13950000 | -2.38980600 | -0.45769600 |
| O  | -4.89684400 | -0.32669900 | -0.66971400 |
| C  | -6.56519900 | -2.11112100 | -0.46221500 |
| H  | -7.17982700 | -1.45952000 | 0.16459800  |
| H  | -6.99991300 | -2.10036000 | -1.46940800 |
| H  | -6.58167500 | -3.13292300 | -0.08226500 |
| C  | 0.18331100  | -1.34010300 | 4.00066400  |
| H  | -0.50647400 | -0.72874100 | 4.58763000  |
| H  | 0.26164000  | -2.31846100 | 4.48937900  |
| H  | 1.17372900  | -0.87115200 | 4.04514300  |
| C  | -3.17074100 | 4.87347900  | 0.49566600  |
| H  | -2.83079000 | 5.60649500  | -0.24596200 |
| H  | -4.26248600 | 4.90985300  | 0.51863300  |
| H  | -2.80673600 | 5.19676700  | 1.47857200  |
| C  | 4.96885800  | -5.63683100 | -1.24779400 |
| H  | 5.21404200  | -6.70262000 | -1.22549300 |
| H  | 4.55366000  | -5.41819000 | -2.23871900 |
| H  | 5.91183800  | -5.08826300 | -1.13239700 |
| Fe | -2.82211000 | -0.71281900 | -0.74172900 |
| C  | 4.22412300  | 4.91855300  | -0.02716300 |
| C  | 4.28801900  | 4.22761400  | -1.30503300 |
| C  | 3.73277300  | 3.00430700  | -1.49345600 |
| C  | 2.90302000  | 2.44248800  | -0.42653200 |
| H  | 4.76531400  | 5.85314900  | 0.07250700  |
| H  | 4.86821300  | 4.67980900  | -2.10168700 |
| H  | 3.88696300  | 2.42711400  | -2.39566400 |
| O  | 1.66975700  | 3.11732600  | -0.03546200 |
| O  | -2.03159600 | -1.05581500 | -2.31342900 |
| H  | -2.20832800 | -1.34793400 | -3.22229100 |
| C  | 3.61021100  | 4.37306900  | 1.05628900  |
| H  | 3.70014200  | 4.81908500  | 2.04036700  |
| C  | 2.85389100  | 3.13072500  | 0.93145800  |
| H  | 2.63919800  | 2.53003400  | 1.80787600  |
| N  | 2.76152500  | 0.94784500  | -0.42263400 |
| O  | 3.68112500  | 0.29485500  | -0.98708600 |
| O  | 1.77938500  | 0.43436600  | 0.16921600  |

### *Separate reactants GAS*

NBZ-gas:

|   |             |             |             |
|---|-------------|-------------|-------------|
| C | 0.43101400  | -1.22380200 | 0.00000100  |
| C | 1.82734800  | -1.21575200 | 0.00000200  |
| C | 2.52495000  | 0.00000000  | 0.00000000  |
| C | 1.82734800  | 1.21575200  | -0.00000100 |
| C | 0.43101400  | 1.22380200  | -0.00000200 |
| C | -0.24357700 | 0.00000000  | 0.00000000  |
| N | -1.71008100 | 0.00000000  | -0.00000100 |

|   |             |             |             |
|---|-------------|-------------|-------------|
| O | -2.30585600 | 1.11552400  | 0.00000400  |
| O | -2.30585600 | -1.11552400 | -0.00000300 |
| H | -0.13595500 | -2.14523800 | 0.00000200  |
| H | 2.36885600  | -2.15515300 | 0.00000300  |
| H | 3.60989100  | 0.00000000  | 0.00000100  |
| H | 2.36885600  | 2.15515300  | -0.00000300 |
| H | -0.13595500 | 2.14523800  | -0.00000300 |

Asn-GAS:

|   |             |             |             |
|---|-------------|-------------|-------------|
| C | 0.69291600  | -0.72436500 | 0.21426700  |
| H | 0.59863000  | -1.64963200 | -0.37013400 |
| H | 0.74215700  | -1.02928300 | 1.27055700  |
| C | -0.56200300 | 0.12696000  | 0.04225100  |
| O | -0.54199900 | 1.37505600  | 0.07699700  |
| N | -1.73046700 | -0.57130500 | -0.12486500 |
| H | -2.59359200 | -0.05539800 | -0.20607200 |
| H | -1.75884300 | -1.57671300 | -0.17310100 |
| C | 1.96905000  | 0.03412200  | -0.16770900 |
| H | 2.01568500  | 0.98513600  | 0.36925400  |
| H | 2.85902600  | -0.55621300 | 0.07389300  |
| H | 1.98642300  | 0.26049100  | -1.23917000 |

FeIII+ligands-GAS:

|   |             |             |             |
|---|-------------|-------------|-------------|
| C | -3.32676100 | -1.45326300 | -0.69608500 |
| N | -3.39348000 | -1.51663500 | 0.70444900  |
| H | -4.13231200 | -1.95649800 | 1.23349100  |
| C | -2.32713900 | -0.86735800 | 1.23824000  |
| H | -2.13345200 | -0.73465800 | 2.28876000  |
| N | -1.56698100 | -0.39217800 | 0.23983400  |
| C | -2.18194400 | -0.74409300 | -0.96652300 |
| H | -1.77727400 | -0.43438800 | -1.91399700 |
| C | 2.77304400  | -2.47137600 | -0.16491200 |
| N | 3.61858200  | -1.35250000 | -0.19435300 |
| H | 4.62005700  | -1.38215200 | -0.32011500 |
| C | 2.88565900  | -0.22287400 | -0.02404700 |
| H | 3.26977000  | 0.78278400  | -0.00619100 |
| N | 1.59458500  | -0.56242900 | 0.11561600  |
| C | 1.51399200  | -1.95792500 | 0.02994400  |
| H | 0.57541600  | -2.47683000 | 0.11008300  |
| C | 0.56714000  | 2.67380100  | -1.10709900 |
| O | 1.33219700  | 2.41230600  | -0.07412900 |
| O | -0.44162200 | 1.86923300  | -1.26896100 |
| O | -0.04878300 | 0.99209900  | 2.37331000  |
| O | -0.94807800 | 2.17770200  | 2.04337700  |
| H | -0.42863900 | 2.93667100  | 2.40257800  |
| C | 0.81023400  | 3.83424800  | -2.00417300 |
| H | 0.26922600  | 4.70801000  | -1.61834400 |
| H | 1.87245800  | 4.08333300  | -2.03380400 |

|    |             |             |             |
|----|-------------|-------------|-------------|
| H  | 0.43413200  | 3.62534800  | -3.00735300 |
| C  | 3.26062700  | -3.87192600 | -0.32534500 |
| H  | 3.97330400  | -4.14673300 | 0.46127000  |
| H  | 2.42103500  | -4.56839900 | -0.26847600 |
| H  | 3.75291300  | -4.02324400 | -1.29332100 |
| C  | -4.34911500 | -2.06432800 | -1.59144200 |
| H  | -5.34568500 | -1.63994000 | -1.42059400 |
| H  | -4.08754600 | -1.87957200 | -2.63582800 |
| H  | -4.41845100 | -3.14997900 | -1.45265200 |
| Fe | 0.09469200  | 0.78008800  | 0.48059800  |

***Benzene Model 1***

BNZ-FeIII-RC-modell:

|    |             |             |             |
|----|-------------|-------------|-------------|
| C  | -1.81952800 | 0.27016500  | 1.88121700  |
| N  | -2.31087100 | 0.36772400  | 0.58648000  |
| H  | -3.26380300 | 0.61676500  | 0.33084500  |
| C  | -1.33332800 | 0.06556300  | -0.28238600 |
| H  | -1.44923600 | 0.04863700  | -1.35491500 |
| N  | -0.21613200 | -0.22480200 | 0.38403600  |
| C  | -0.51043300 | -0.10256100 | 1.73387900  |
| H  | 0.22999800  | -0.30284500 | 2.49285400  |
| C  | 3.23423900  | 3.13725600  | -0.13983000 |
| N  | 4.27199400  | 2.40409800  | -0.69824600 |
| H  | 5.18227100  | 2.77466800  | -0.94998700 |
| C  | 3.89063800  | 1.12602300  | -0.84156100 |
| H  | 4.51146900  | 0.33653200  | -1.23470100 |
| N  | 2.63965700  | 0.98455800  | -0.40248300 |
| C  | 2.22136400  | 2.23325700  | 0.03550500  |
| H  | 1.23683000  | 2.38999600  | 0.44828100  |
| C  | 3.17494700  | -2.23027300 | 0.78199600  |
| O  | 2.07423700  | -1.84116500 | 1.29897200  |
| O  | 3.40456100  | -1.88960100 | -0.42894700 |
| C  | -6.09397900 | -0.44651500 | 0.53504400  |
| C  | -5.74244100 | -1.21847600 | -0.57635200 |
| C  | -5.25212600 | -0.60116900 | -1.73113700 |
| C  | -5.11336500 | 0.79012900  | -1.77558300 |
| H  | -6.48184300 | -0.92669600 | 1.42963500  |
| H  | -5.85358900 | -2.29903900 | -0.54389000 |
| H  | -4.98508900 | -1.20170400 | -2.59678100 |
| O  | 1.04299300  | -1.25056800 | -2.16568400 |
| O  | 0.79422900  | -2.58438700 | -1.65155700 |
| H  | 1.59148700  | -3.06742900 | -1.95820900 |
| Fe | 1.59302800  | -0.78266000 | -0.43432600 |
| C  | -2.65156900 | 0.52706400  | 3.09089800  |
| H  | -3.04900500 | 1.54916700  | 3.09867100  |
| H  | -3.50326500 | -0.16143000 | 3.14407600  |
| H  | -2.04833500 | 0.39011100  | 3.99212200  |
| C  | 3.34186800  | 4.59328600  | 0.15586300  |

|   |             |             |             |
|---|-------------|-------------|-------------|
| H | 4.16085400  | 4.80118500  | 0.85480100  |
| H | 3.52544400  | 5.17511300  | -0.75544600 |
| H | 2.41255800  | 4.95182200  | 0.60605800  |
| C | 4.13770000  | -3.06927000 | 1.55986000  |
| H | 3.82874100  | -4.11982500 | 1.48497700  |
| H | 5.14821800  | -2.97614100 | 1.15624900  |
| H | 4.11779300  | -2.78937700 | 2.61624200  |
| C | -5.95501100 | 0.94507400  | 0.49282800  |
| H | -6.23640800 | 1.54640600  | 1.35349200  |
| C | -5.46378000 | 1.56392300  | -0.66296000 |
| H | -5.36486000 | 2.64578600  | -0.70008900 |
| H | -4.74081500 | 1.27132800  | -2.67627000 |

BNZ-FeIII-O-C1-concerted-TS-model1:

|    |             |             |             |
|----|-------------|-------------|-------------|
| C  | -2.93496600 | 2.78542500  | 0.76336500  |
| N  | -1.72013500 | 3.45640500  | 0.75764500  |
| H  | -1.58380500 | 4.42821800  | 1.01282200  |
| C  | -0.75420400 | 2.61912700  | 0.33789500  |
| H  | 0.28380700  | 2.88796300  | 0.21959100  |
| N  | -1.27853300 | 1.42615700  | 0.07329200  |
| C  | -2.63645100 | 1.51964000  | 0.33261600  |
| H  | -3.29806200 | 0.68229500  | 0.17354000  |
| C  | -0.42461600 | -2.32031500 | 2.83947100  |
| N  | -0.21853700 | -3.33267700 | 1.91614500  |
| H  | -0.15106200 | -4.32133500 | 2.13164800  |
| C  | -0.13061900 | -2.79758300 | 0.68388900  |
| H  | 0.02279900  | -3.36151100 | -0.22256700 |
| N  | -0.26661800 | -1.47580100 | 0.75345400  |
| C  | -0.45165600 | -1.17004100 | 2.09382800  |
| H  | -0.60337000 | -0.15530400 | 2.42804600  |
| C  | -1.59769100 | -1.70481400 | -2.34947800 |
| O  | -2.19721900 | -0.76577600 | -1.74697300 |
| O  | -0.32964600 | -1.82418300 | -2.17441300 |
| C  | 4.67782200  | 1.92194800  | 0.20450400  |
| C  | 4.87368200  | 0.94797900  | -0.79461500 |
| C  | 4.04600200  | -0.15667200 | -0.84876700 |
| C  | 2.96945300  | -0.28936900 | 0.07513100  |
| H  | 5.33473700  | 2.78670600  | 0.24203100  |
| H  | 5.68040700  | 1.06611400  | -1.51169300 |
| H  | 4.18637300  | -0.91902800 | -1.60922300 |
| O  | 1.50751400  | 0.48969900  | -1.01593600 |
| O  | 0.27619800  | 1.03316700  | -2.40001200 |
| H  | 0.73187200  | 0.48977000  | -3.07015600 |
| Fe | -0.28274200 | -0.14066400 | -0.91416400 |
| C  | -4.21877600 | 3.43465000  | 1.15629100  |
| H  | -4.18354700 | 3.81236800  | 2.18552000  |
| H  | -4.45768100 | 4.27939800  | 0.49861800  |
| H  | -5.03583400 | 2.71137000  | 1.08857700  |

|   |             |             |             |
|---|-------------|-------------|-------------|
| C | -0.57465700 | -2.57498800 | 4.30126100  |
| H | -1.43589100 | -3.22115800 | 4.51062800  |
| H | 0.31508600  | -3.06226800 | 4.71839600  |
| H | -0.72388800 | -1.63066700 | 4.83142700  |
| C | -2.32401800 | -2.65981100 | -3.25165900 |
| H | -1.92651700 | -2.57109700 | -4.26929200 |
| H | -2.14682500 | -3.68941300 | -2.92174100 |
| H | -3.39534400 | -2.45109500 | -3.25859400 |
| C | 3.66082300  | 1.78471200  | 1.15412000  |
| H | 3.53591100  | 2.53459700  | 1.92956500  |
| C | 2.82338700  | 0.67456900  | 1.10867900  |
| H | 2.04175400  | 0.53930300  | 1.84941500  |
| H | 2.47127700  | -1.24656300 | 0.16746500  |

BNZ-FeIII-O-C1-concerted-INT-model1 (epoxide):

|    |             |             |             |
|----|-------------|-------------|-------------|
| C  | -1.87739000 | 3.34465200  | 1.18061200  |
| N  | -0.53350500 | 3.59120600  | 0.94512600  |
| H  | -0.02924100 | 4.42513500  | 1.22470500  |
| C  | 0.00107400  | 2.54646100  | 0.28801800  |
| H  | 1.03717000  | 2.47716800  | -0.00219200 |
| N  | -0.93121500 | 1.62017100  | 0.08044200  |
| C  | -2.10694600 | 2.11024300  | 0.62905700  |
| H  | -3.02364300 | 1.54336500  | 0.58269400  |
| C  | 0.52730200  | -1.92815900 | 2.85277500  |
| N  | 0.11771700  | -3.06559400 | 2.17478200  |
| H  | 0.12228800  | -4.00812600 | 2.54809300  |
| C  | -0.29661300 | -2.71934800 | 0.94060400  |
| H  | -0.67546900 | -3.41055100 | 0.20522300  |
| N  | -0.18030600 | -1.40573000 | 0.77464600  |
| C  | 0.33571600  | -0.90587800 | 1.96091300  |
| H  | 0.53239500  | 0.14586000  | 2.09485300  |
| C  | -2.70867600 | -1.68279400 | -1.34220800 |
| O  | -2.78140400 | -0.53444700 | -0.78574000 |
| O  | -1.55966300 | -2.11530200 | -1.67840300 |
| C  | 4.49654800  | 0.13769600  | -0.01435900 |
| C  | 4.33755300  | 1.41696000  | -0.68739500 |
| C  | 3.39300600  | 1.60643900  | -1.63879000 |
| C  | 2.39026900  | 0.56453600  | -1.90437300 |
| H  | 5.33522900  | 0.01904500  | 0.66632300  |
| H  | 5.06656600  | 2.19624500  | -0.48206200 |
| H  | 3.37788300  | 2.50271800  | -2.25223100 |
| O  | 1.53645500  | 0.20110600  | -0.76227000 |
| O  | -0.49694300 | 0.22546500  | -2.69873100 |
| H  | -0.86599600 | -0.42944900 | -3.31588800 |
| Fe | -0.69105200 | -0.22254600 | -0.93516300 |
| C  | -2.75528500 | 4.31166100  | 1.90377700  |
| H  | -2.38155700 | 4.51455800  | 2.91475300  |
| H  | -2.82052000 | 5.26956500  | 1.37331500  |
| H  | -3.76603800 | 3.90450300  | 1.99137600  |

|   |             |             |             |
|---|-------------|-------------|-------------|
| C | 1.04613200  | -1.95285700 | 4.25140600  |
| H | 0.29903100  | -2.34546800 | 4.95208100  |
| H | 1.94392400  | -2.57711600 | 4.33820000  |
| H | 1.30698300  | -0.93930900 | 4.56762200  |
| C | -3.95188300 | -2.49021400 | -1.59576000 |
| H | -4.61302900 | -1.93486800 | -2.27062800 |
| H | -3.70500200 | -3.45712100 | -2.03797900 |
| H | -4.49355200 | -2.63690600 | -0.65492500 |
| C | 3.70820700  | -0.92193500 | -0.30919000 |
| H | 3.92510300  | -1.91468700 | 0.07393900  |
| C | 2.55542000  | -0.75613600 | -1.20629500 |
| H | 2.11763800  | -1.64305300 | -1.65670700 |
| H | 1.81421000  | 0.60177700  | -2.82289000 |

### ***Benzene Model2***

BNZ-FeIII-RC-model2:

|   |             |             |             |
|---|-------------|-------------|-------------|
| C | 3.65148900  | -3.23171200 | -1.86810000 |
| N | 2.77085700  | -2.73274000 | -2.81717200 |
| H | 2.71486100  | -3.03349100 | -3.78410800 |
| C | 2.01823500  | -1.76776900 | -2.26108500 |
| H | 1.25842300  | -1.20420400 | -2.77983000 |
| N | 2.36418400  | -1.61109500 | -0.98581000 |
| C | 3.38117600  | -2.51697900 | -0.73086700 |
| H | 3.85257900  | -2.57869500 | 0.23795400  |
| C | -1.62745700 | -3.09131900 | 1.40157600  |
| N | -2.33718000 | -2.02272400 | 0.87444500  |
| H | -3.34923800 | -1.92995700 | 0.72607100  |
| C | -1.47557300 | -1.05467200 | 0.53029300  |
| H | -1.77211100 | -0.11407600 | 0.09283100  |
| N | -0.22729500 | -1.43347700 | 0.80484700  |
| C | -0.31219100 | -2.70573400 | 1.34942700  |
| H | 0.56604200  | -3.25202500 | 1.66111200  |
| C | -6.13012200 | 0.76283900  | -0.98792300 |
| H | -5.57948900 | 0.69415500  | -1.93469300 |
| H | -5.62538200 | 1.54559000  | -0.40868600 |
| C | -5.85412800 | -0.54281300 | -0.24999300 |
| O | -4.68746600 | -0.86841600 | 0.01449600  |
| N | -6.90879400 | -1.31144600 | 0.08858000  |
| H | -6.75173400 | -2.18265000 | 0.57973900  |
| H | -7.86245600 | -1.04982100 | -0.11772200 |
| C | 2.75858900  | 0.60642000  | 2.23407800  |
| O | 1.50037000  | 0.81698200  | 2.08486500  |
| O | 3.33528900  | -0.10839500 | 1.35708900  |
| C | 3.51119900  | 1.21032500  | 3.38103700  |
| H | 3.73051400  | 2.25961800  | 3.14608600  |
| H | 2.90145400  | 1.19240800  | 4.28862500  |
| H | 4.45414900  | 0.68428500  | 3.54327300  |
| C | -2.27093100 | -4.34787600 | 1.88707600  |

|    |             |             |             |
|----|-------------|-------------|-------------|
| H  | -2.83536900 | -4.84446100 | 1.08843100  |
| H  | -1.50679800 | -5.04265600 | 2.24582200  |
| H  | -2.96556500 | -4.15064200 | 2.71257700  |
| C  | -7.58832300 | 1.15107700  | -1.24927600 |
| H  | -7.62870600 | 2.10787700  | -1.78011500 |
| H  | -8.10262900 | 0.41017600  | -1.87288500 |
| H  | -8.15154000 | 1.26960400  | -0.31606900 |
| Fe | 1.44785200  | -0.30306400 | 0.34245000  |
| C  | 0.54086200  | 5.53364000  | -1.57185400 |
| C  | 1.80467400  | 5.51751100  | -0.97481800 |
| C  | 2.00213900  | 4.82654100  | 0.22449000  |
| C  | 0.93267800  | 4.14885800  | 0.82660300  |
| H  | 0.38831200  | 6.07176300  | -2.50367500 |
| H  | 2.63345100  | 6.04306700  | -1.44132300 |
| H  | 2.98300700  | 4.81870000  | 0.69276300  |
| O  | 0.57596700  | 0.80700700  | -0.91067400 |
| O  | 1.78685300  | 1.60010000  | -0.89681700 |
| H  | 1.50354300  | 2.40135000  | -0.39431000 |
| C  | -0.52710300 | 4.85824100  | -0.97376200 |
| H  | -1.50864700 | 4.87224800  | -1.43986800 |
| C  | -0.33255700 | 4.16445300  | 0.22384700  |
| H  | -1.16147400 | 3.64101700  | 0.69265300  |
| H  | 1.08077400  | 3.61390500  | 1.76100300  |
| C  | 4.63259000  | -4.31488000 | -2.16330700 |
| H  | 4.13086300  | -5.24018100 | -2.47183200 |
| H  | 5.32093800  | -4.02580700 | -2.96679000 |
| H  | 5.22608400  | -4.53219500 | -1.27129700 |

BNZ-FeIII-O-C1-concerted-TS-model2:

|   |             |             |             |
|---|-------------|-------------|-------------|
| C | -4.30530900 | -2.74380400 | -1.40615400 |
| N | -3.07160900 | -3.36376100 | -1.54390100 |
| H | -2.90388500 | -4.24130700 | -2.02291500 |
| C | -2.13378100 | -2.62503900 | -0.92167900 |
| H | -1.08940700 | -2.88679700 | -0.85377900 |
| N | -2.69585600 | -1.54641500 | -0.38656700 |
| C | -4.04761300 | -1.61178700 | -0.67937900 |
| H | -4.73629800 | -0.85286300 | -0.34100600 |
| C | -2.73894300 | 2.82748900  | -2.05224600 |
| N | -2.58237000 | 3.58017100  | -0.89868000 |
| H | -2.69914600 | 4.58510600  | -0.82957200 |
| C | -2.26044300 | 2.76424800  | 0.12254900  |
| H | -2.08521800 | 3.08724100  | 1.13665600  |
| N | -2.19648100 | 1.50707600  | -0.30537700 |
| C | -2.49446600 | 1.53676300  | -1.66024500 |
| H | -2.51790500 | 0.63527300  | -2.25343000 |
| C | 8.37545000  | 0.45439800  | -0.72645200 |
| H | 9.12240200  | 0.05961800  | -1.42750200 |
| H | 8.87080100  | 1.27722900  | -0.19222500 |
| C | 8.04708100  | -0.63064500 | 0.29774100  |



|    |             |             |             |
|----|-------------|-------------|-------------|
| O  | 6.89792400  | -0.93612100 | 0.61811500  |
| N  | 9.13060500  | -1.24800900 | 0.83978500  |
| H  | 8.99355500  | -1.91748000 | 1.58627500  |
| H  | 10.07466400 | -0.94790600 | 0.63830600  |
| C  | -2.94009400 | 0.65071900  | 2.91615900  |
| O  | -1.76483100 | 1.05674700  | 2.58920500  |
| O  | -3.51744600 | -0.18252600 | 2.15711800  |
| C  | -3.57812100 | 1.13543100  | 4.18524200  |
| H  | -4.65581200 | 0.95931100  | 4.17023500  |
| H  | -3.14456200 | 0.58464800  | 5.02952500  |
| H  | -3.36666700 | 2.19736600  | 4.33997400  |
| C  | -3.09730800 | 3.42505700  | -3.37126900 |
| H  | -2.34297700 | 4.14935100  | -3.70215000 |
| H  | -3.16743700 | 2.63988200  | -4.12878100 |
| H  | -4.06200700 | 3.94500000  | -3.32979100 |
| C  | -5.56529100 | -3.30007200 | -1.97590100 |
| H  | -5.78070500 | -4.29936500 | -1.57866500 |
| H  | -6.40635900 | -2.64848900 | -1.72428700 |
| H  | -5.51358900 | -3.38093200 | -3.06879900 |
| Fe | -1.73514800 | -0.19251900 | 0.90163300  |
| C  | 3.71761600  | -0.19464200 | -0.06462800 |
| C  | 3.11617200  | 0.90281700  | 0.56919400  |
| C  | 1.83680800  | 1.29565300  | 0.20440100  |
| C  | 1.11616700  | 0.55877400  | -0.77468900 |
| H  | 4.72799200  | -0.48892600 | 0.21103000  |
| H  | 3.65808600  | 1.44627600  | 1.33762900  |
| H  | 1.36384900  | 2.14903500  | 0.68067200  |
| O  | 0.09963300  | -0.53060700 | 0.56482300  |
| O  | -0.78254600 | -1.63276900 | 1.86531200  |
| H  | -0.25602400 | -1.24268200 | 2.58788000  |
| C  | 3.03776700  | -0.90168200 | -1.07299200 |
| H  | 3.52472500  | -1.73933700 | -1.56365100 |
| C  | 1.76005100  | -0.51966100 | -1.44254400 |
| H  | 1.22671100  | -1.05045500 | -2.22594600 |
| H  | 0.21914700  | 0.98612600  | -1.20718700 |
| C  | 7.15172000  | 0.97219200  | -1.47801700 |
| H  | 7.44720300  | 1.74994100  | -2.19114400 |
| H  | 6.65886500  | 0.16980100  | -2.03694200 |
| H  | 6.41717400  | 1.40236400  | -0.79081000 |

BNZ-FeIII-O-C1-concerted-INT-model2 (epoxide):

|   |             |             |             |
|---|-------------|-------------|-------------|
| C | -4.43215500 | 2.06137800  | 1.10454300  |
| N | -3.46453000 | 2.94508900  | 0.65088400  |
| H | -3.48592400 | 3.95181400  | 0.76863100  |
| C | -2.49010100 | 2.25723500  | 0.03040000  |
| H | -1.60851500 | 2.70402700  | -0.39991800 |
| N | -2.77007400 | 0.95678300  | 0.05571400  |
| C | -3.98224000 | 0.82451400  | 0.71752500  |
| H | -4.44240000 | -0.14170700 | 0.85624700  |

|    |             |             |             |
|----|-------------|-------------|-------------|
| C  | 0.36216700  | -1.38592900 | 2.89351800  |
| N  | 0.44572600  | -2.61933400 | 2.26503100  |
| H  | 0.89967100  | -3.44355900 | 2.64247600  |
| C  | -0.16471100 | -2.55010100 | 1.06667700  |
| H  | -0.24229500 | -3.36808700 | 0.36839800  |
| N  | -0.65024500 | -1.32748500 | 0.87538300  |
| C  | -0.32752700 | -0.59601400 | 2.01064700  |
| H  | -0.60241100 | 0.44181100  | 2.11159800  |
| C  | 5.98958000  | 0.52769500  | -0.73119300 |
| H  | 5.35926700  | 1.34139100  | -0.35723600 |
| H  | 5.76050900  | 0.44073400  | -1.80248100 |
| C  | 5.46177600  | -0.74605800 | -0.07363500 |
| O  | 4.25479600  | -0.91656700 | 0.12045300  |
| N  | 6.37773100  | -1.68582700 | 0.27043900  |
| H  | 6.05306300  | -2.56491900 | 0.65234500  |
| H  | 7.36308900  | -1.58885600 | 0.07294700  |
| C  | -2.74821400 | -2.76201600 | -1.43178200 |
| O  | -1.49258100 | -2.64523600 | -1.61547700 |
| O  | -3.36260300 | -1.80095800 | -0.85785600 |
| C  | -3.49653700 | -3.96963200 | -1.93710300 |
| H  | -3.90250800 | -3.73496300 | -2.92917300 |
| H  | -2.82669400 | -4.82740200 | -2.02999000 |
| H  | -4.33473200 | -4.20725100 | -1.27686100 |
| C  | 0.95783000  | -1.11347600 | 4.23738900  |
| H  | 2.04159000  | -1.28210400 | 4.23567300  |
| H  | 0.77591100  | -0.07320400 | 4.52018700  |
| H  | 0.52062900  | -1.75771700 | 5.01002700  |
| C  | -5.64321300 | 2.52165500  | 1.84689300  |
| H  | -6.25980500 | 3.19048600  | 1.23395500  |
| H  | -6.25701100 | 1.66267300  | 2.13092700  |
| H  | -5.37096500 | 3.06222400  | 2.76158300  |
| C  | 7.47165800  | 0.86732300  | -0.54050600 |
| H  | 7.69277500  | 1.84000800  | -0.99314600 |
| H  | 7.74049100  | 0.92550100  | 0.52052800  |
| H  | 8.13070400  | 0.13436500  | -1.02208300 |
| Fe | -1.62136100 | -0.56802600 | -0.86517400 |
| C  | 2.14693700  | 2.98438200  | 0.33563500  |
| C  | 1.47882800  | 3.66904500  | -0.75993100 |
| C  | 0.93565400  | 2.98859100  | -1.79717500 |
| C  | 0.86477100  | 1.51954400  | -1.76225100 |
| H  | 2.64797000  | 3.59036500  | 1.08617800  |
| H  | 1.51302900  | 4.75535800  | -0.78082200 |
| H  | 0.58065400  | 3.49988400  | -2.68753400 |
| O  | 0.10444100  | 0.94498200  | -0.65199600 |
| O  | -1.55505300 | -0.08257600 | -2.62643100 |
| H  | -1.48980000 | -0.83452200 | -3.23965700 |
| C  | 2.26153800  | 1.63572800  | 0.36534700  |
| H  | 2.90233700  | 1.12664400  | 1.07653500  |
| C  | 1.56313900  | 0.81089300  | -0.63266000 |
| H  | 1.90142900  | -0.21076000 | -0.77235100 |

|   |            |            |             |
|---|------------|------------|-------------|
| H | 0.67798900 | 0.98614500 | -2.68815700 |
|---|------------|------------|-------------|

*Separate reactants*

BNZ:

|   |             |             |             |
|---|-------------|-------------|-------------|
| C | 1.21702300  | 0.68782000  | -0.00004100 |
| C | 0.01280300  | 1.39788600  | 0.00001700  |
| C | -1.20419500 | 0.70999300  | -0.00001400 |
| C | -1.21704100 | -0.68782500 | -0.00002600 |
| C | -0.01278800 | -1.39786300 | 0.00004400  |
| C | 1.20419000  | -0.71000200 | -0.00001200 |
| H | 2.14057500  | -1.26222200 | 0.00008100  |
| H | 2.16355000  | 1.22244100  | -0.00008500 |
| H | 0.02290000  | 2.48498700  | 0.00007700  |
| H | -2.14055400 | 1.26220800  | 0.00006800  |
| H | -2.16354700 | -1.22251300 | -0.00002100 |
| H | -0.02287700 | -2.48494900 | 0.00006800  |

Asn:

|   |             |             |             |
|---|-------------|-------------|-------------|
| C | -1.81499100 | -7.27773200 | -1.71162500 |
| H | -1.68398200 | -8.31713400 | -1.38527000 |
| H | -2.18867700 | -7.32682400 | -2.74474700 |
| C | -0.45600100 | -6.58032500 | -1.75758900 |
| O | -0.30781700 | -5.38859500 | -1.49969200 |
| N | 0.58783200  | -7.38380800 | -2.11198400 |
| H | 1.48742500  | -6.95787400 | -2.29585800 |
| H | 0.44182200  | -8.32989300 | -2.43681900 |
| C | -2.82454600 | -6.54964400 | -0.82630600 |
| H | -2.93985400 | -5.50941200 | -1.14446200 |
| H | -3.80371400 | -7.03862100 | -0.87758100 |
| H | -2.50336400 | -6.54327800 | 0.22145300  |

FeIII+ligands:

|   |             |             |            |
|---|-------------|-------------|------------|
| C | -3.25191100 | -2.16702600 | 3.90329700 |
| N | -3.91643000 | -1.66920100 | 2.79058800 |
| H | -4.92266500 | -1.58447000 | 2.69424900 |
| C | -3.01908100 | -1.33182500 | 1.84999000 |
| H | -3.26573500 | -0.93071800 | 0.87907900 |
| N | -1.78957100 | -1.58301900 | 2.29729200 |
| C | -1.92472800 | -2.10638000 | 3.57425500 |
| H | -1.06645700 | -2.41005700 | 4.15375500 |
| C | 0.87967800  | 2.41542300  | 3.11601100 |
| N | 2.03594800  | 2.14163700  | 2.39816600 |
| H | 2.85236000  | 2.74168700  | 2.34473800 |
| C | 1.90894900  | 0.95803800  | 1.77930800 |
| H | 2.66251400  | 0.50138000  | 1.15683400 |
| N | 0.71470300  | 0.43574900  | 2.05963100 |

|    |             |             |             |
|----|-------------|-------------|-------------|
| C  | 0.06543100  | 1.33822300  | 2.89136800  |
| H  | -0.92790600 | 1.14987700  | 3.26859700  |
| C  | 1.82456500  | -2.92911900 | 1.47171300  |
| O  | 1.89036400  | -1.95950800 | 0.63756700  |
| O  | 0.76813800  | -3.01331700 | 2.18042400  |
| O  | -0.73395100 | -0.95762200 | -0.44082400 |
| O  | -0.71236100 | -2.38532300 | -0.69412200 |
| H  | 0.09916200  | -2.47740400 | -1.23784000 |
| C  | 2.91940800  | -3.94326900 | 1.58060300  |
| H  | 2.80492700  | -4.67070400 | 0.76671700  |
| H  | 3.89595800  | -3.46535700 | 1.46548600  |
| H  | 2.86110100  | -4.47404200 | 2.53300800  |
| C  | 0.69649400  | 3.66069000  | 3.91437100  |
| H  | 0.77135600  | 4.55458500  | 3.28365200  |
| H  | -0.28974200 | 3.65885900  | 4.38545000  |
| H  | 1.45167000  | 3.74474700  | 4.70511300  |
| C  | -3.95660500 | -2.63619800 | 5.12946700  |
| H  | -4.64561100 | -3.45954200 | 4.90553000  |
| H  | -3.22801100 | -2.99413200 | 5.86157800  |
| H  | -4.53870600 | -1.83035000 | 5.59283700  |
| Fe | -0.02324500 | -1.30621600 | 1.26007500  |

***Benzene Modell GAS***

BNZ-FeIII-RC-modell-GAS:

|   |             |             |             |
|---|-------------|-------------|-------------|
| C | -1.78200400 | 0.51513200  | 2.01543400  |
| N | -2.35146100 | 0.53503400  | 0.73483100  |
| H | -3.31897500 | 0.75900600  | 0.51949000  |
| C | -1.42124600 | 0.16577200  | -0.17655100 |
| H | -1.59130700 | 0.06541600  | -1.23386300 |
| N | -0.26293000 | -0.08566500 | 0.45865100  |
| C | -0.47901800 | 0.12244800  | 1.82571800  |
| H | 0.29557400  | -0.06040100 | 2.54969500  |
| C | 3.38040000  | 3.00080100  | -0.26061900 |
| N | 4.37818500  | 2.15356600  | -0.76351100 |
| H | 5.31677800  | 2.43716600  | -1.00438600 |
| C | 3.88869400  | 0.89267000  | -0.87745600 |
| H | 4.43662800  | 0.03192700  | -1.22028700 |
| N | 2.60996900  | 0.88719800  | -0.47072100 |
| C | 2.28302100  | 2.19325800  | -0.08766200 |
| H | 1.30597800  | 2.44597800  | 0.28422600  |
| C | 3.00687800  | -2.32263300 | 0.82040000  |
| O | 1.93731300  | -1.82536100 | 1.37027100  |
| O | 3.19820100  | -2.00224700 | -0.43432400 |
| C | -5.88008800 | -0.10485200 | 0.56949800  |
| C | -5.51217100 | -1.17312000 | -0.26004000 |
| C | -4.95760200 | -0.92208400 | -1.52253800 |
| C | -4.76924700 | 0.39779100  | -1.95748800 |
| H | -6.32974000 | -0.29955000 | 1.53799400  |

|    |             |             |             |
|----|-------------|-------------|-------------|
| H  | -5.66795900 | -2.19472100 | 0.07026600  |
| H  | -4.68684300 | -1.75001000 | -2.16959400 |
| O  | 0.72318400  | -1.13389600 | -2.15467300 |
| O  | 0.38556700  | -2.50108900 | -1.56652400 |
| H  | 0.97646000  | -3.10052300 | -2.08303200 |
| Fe | 1.43614100  | -0.78928200 | -0.41363300 |
| C  | -2.53902500 | 0.86374300  | 3.25074100  |
| H  | -2.87957500 | 1.90621800  | 3.24090200  |
| H  | -3.42189600 | 0.22619400  | 3.37643700  |
| H  | -1.90404200 | 0.72910700  | 4.12944300  |
| C  | 3.59640700  | 4.45151000  | 0.00200700  |
| H  | 4.38732700  | 4.61736200  | 0.74321000  |
| H  | 3.87142300  | 4.99480000  | -0.90990600 |
| H  | 2.67994600  | 4.90163000  | 0.39038100  |
| C  | 3.93417900  | -3.21408900 | 1.56528100  |
| H  | 3.54827600  | -4.24130800 | 1.54036700  |
| H  | 4.92456700  | -3.21106500 | 1.10780500  |
| H  | 3.99205900  | -2.91100900 | 2.61303200  |
| C  | -5.69148300 | 1.21768500  | 0.13681100  |
| H  | -6.00224900 | 2.04533000  | 0.76696200  |
| C  | -5.13569200 | 1.46890900  | -1.12834000 |
| H  | -5.01208800 | 2.49061800  | -1.47340600 |
| H  | -4.36248200 | 0.59131100  | -2.94519000 |

BNZ-FeIII-O-C1-concerted-TS-model1-GAS:

|   |             |             |             |
|---|-------------|-------------|-------------|
| C | -2.48173100 | 3.09326100  | 0.91629000  |
| N | -1.19866300 | 3.62404200  | 0.71397800  |
| H | -0.93252000 | 4.58334200  | 0.87824500  |
| C | -0.38229000 | 2.65303600  | 0.22260800  |
| H | 0.64769900  | 2.78065900  | -0.06171500 |
| N | -1.08058300 | 1.51716200  | 0.10841500  |
| C | -2.38776300 | 1.77756000  | 0.53029900  |
| H | -3.15142900 | 1.02157800  | 0.48040500  |
| C | -0.50039800 | -2.33830700 | 2.81739400  |
| N | -0.35401900 | -3.35621500 | 1.86732500  |
| H | -0.32425100 | -4.34444900 | 2.07041900  |
| C | -0.27533000 | -2.80603400 | 0.62389200  |
| H | -0.18228200 | -3.35047200 | -0.29998700 |
| N | -0.36005200 | -1.47345300 | 0.72770900  |
| C | -0.50021200 | -1.17192700 | 2.08782500  |
| H | -0.61139100 | -0.15851100 | 2.43093500  |
| C | -2.02448200 | -1.56073300 | -2.23654600 |
| O | -2.43256800 | -0.53707400 | -1.55738100 |
| O | -0.74829900 | -1.85451700 | -2.13927800 |
| C | 4.78021200  | 1.58229900  | 0.08034600  |
| C | 4.90058500  | 0.63540100  | -0.95855300 |
| C | 4.02692600  | -0.43859400 | -1.01885700 |
| C | 2.98047600  | -0.56478800 | -0.05799800 |
| H | 5.47189700  | 2.41743100  | 0.12395400  |

|    |             |             |             |
|----|-------------|-------------|-------------|
| H  | 5.68354100  | 0.74730700  | -1.70009300 |
| H  | 4.11033000  | -1.17584500 | -1.80969400 |
| O  | 1.50442500  | 0.32095500  | -1.07902400 |
| O  | 0.25384200  | 0.95437100  | -2.41868700 |
| H  | 0.73778500  | 0.52987500  | -3.15877400 |
| Fe | -0.38305700 | -0.14545800 | -0.91118600 |
| C  | -3.62562500 | 3.89815700  | 1.43300700  |
| H  | -3.42685900 | 4.29994000  | 2.43410100  |
| H  | -3.85996800 | 4.74229700  | 0.77327500  |
| H  | -4.51995800 | 3.27403400  | 1.49793100  |
| C  | -0.63079500 | -2.59858300 | 4.28073500  |
| H  | -1.51382100 | -3.20766800 | 4.50834100  |
| H  | 0.24718100  | -3.11788300 | 4.68335900  |
| H  | -0.73332500 | -1.65455500 | 4.82104600  |
| C  | -2.93651200 | -2.34530200 | -3.11748100 |
| H  | -2.92451400 | -1.91143700 | -4.12548700 |
| H  | -2.60211700 | -3.38163900 | -3.19609100 |
| H  | -3.96095500 | -2.29787000 | -2.74371600 |
| C  | 3.78920600  | 1.44964700  | 1.06262300  |
| H  | 3.72475000  | 2.17266500  | 1.86855500  |
| C  | 2.90579700  | 0.37170200  | 1.01133800  |
| H  | 2.14901700  | 0.24012800  | 1.77651500  |
| H  | 2.43630800  | -1.49841900 | 0.01073900  |

BNZ-FeIII-O-C1-concerted-INT-model1-GAS (epoxide):

|   |             |             |             |
|---|-------------|-------------|-------------|
| C | -1.56820500 | 3.51847300  | 1.09248400  |
| N | -0.16788500 | 3.55758200  | 1.07461000  |
| H | 0.39777200  | 4.30310400  | 1.45153900  |
| C | 0.30722600  | 2.44263200  | 0.45562900  |
| H | 1.34701100  | 2.20800300  | 0.31339700  |
| N | -0.72622900 | 1.68062100  | 0.07422700  |
| C | -1.89940600 | 2.34020700  | 0.46062200  |
| H | -2.86436700 | 1.91578800  | 0.24519400  |
| C | -0.01275900 | -2.01238000 | 2.91491400  |
| N | -0.46413600 | -3.09999900 | 2.15677500  |
| H | -0.61170500 | -4.03520700 | 2.50546100  |
| C | -0.68577300 | -2.69413800 | 0.87530300  |
| H | -1.04631900 | -3.31456400 | 0.07409300  |
| N | -0.39746200 | -1.39090600 | 0.77051400  |
| C | 0.02822300  | -0.96028200 | 2.03218500  |
| H | 0.32397300  | 0.05736300  | 2.20973800  |
| C | -2.80480500 | -1.37736200 | -1.54425300 |
| O | -2.74789500 | -0.18359100 | -1.01925600 |
| O | -1.67640200 | -1.99596000 | -1.71371700 |
| C | 4.59934600  | -0.34973900 | 0.08607800  |
| C | 4.55963300  | 0.99868000  | -0.46395800 |
| C | 3.62646900  | 1.36598000  | -1.38032200 |
| C | 2.54831400  | 0.44315700  | -1.74989000 |
| H | 5.42049900  | -0.60751000 | 0.74687500  |

|    |             |             |             |
|----|-------------|-------------|-------------|
| H  | 5.35639000  | 1.68376300  | -0.19239600 |
| H  | 3.68504700  | 2.31950300  | -1.89444700 |
| O  | 1.58338800  | 0.06216600  | -0.59249800 |
| O  | -0.18450100 | 0.16232600  | -2.69234900 |
| H  | -0.60815700 | -0.20325300 | -3.48989200 |
| Fe | -0.60193600 | -0.16072100 | -0.93788500 |
| C  | -2.38708100 | 4.60041900  | 1.71763700  |
| H  | -2.16803200 | 4.71032700  | 2.78665000  |
| H  | -2.21510300 | 5.57069700  | 1.23634500  |
| H  | -3.45025500 | 4.36868400  | 1.62000800  |
| C  | 0.30617900  | -2.10193300 | 4.36926800  |
| H  | -0.57086400 | -2.38848500 | 4.96225600  |
| H  | 1.09918200  | -2.83216800 | 4.57137400  |
| H  | 0.64946600  | -1.13179200 | 4.73645400  |
| C  | -4.10482600 | -1.99570900 | -1.95449600 |
| H  | -4.51638600 | -1.44899400 | -2.81103800 |
| H  | -3.95960800 | -3.03969400 | -2.23308300 |
| H  | -4.83396400 | -1.91752800 | -1.14234000 |
| C  | 3.70703200  | -1.29900400 | -0.29458200 |
| H  | 3.81873800  | -2.33336900 | 0.01145700  |
| C  | 2.58984600  | -0.94754700 | -1.17727400 |
| H  | 2.07221600  | -1.74068100 | -1.70503000 |
| H  | 1.96160200  | 0.61542000  | -2.64399700 |

### ***Benzene Model 2 GAS***

BNZ-FeIII-RC-model2-GAS:

|   |             |             |             |
|---|-------------|-------------|-------------|
| C | -4.02910000 | 2.06597800  | 1.04711800  |
| N | -2.94375500 | 2.71193200  | 0.43470200  |
| H | -2.77646200 | 3.70701800  | 0.42406900  |
| C | -2.13851400 | 1.79060400  | -0.15208500 |
| H | -1.24091500 | 2.01448600  | -0.70399500 |
| N | -2.65385700 | 0.57080900  | 0.05968000  |
| C | -3.83225800 | 0.72775500  | 0.79929000  |
| H | -4.43457700 | -0.12166400 | 1.07077700  |
| C | 0.96188200  | -1.21042400 | 2.68981600  |
| N | 1.80487400  | -1.19134800 | 1.57082100  |
| H | 2.82761400  | -1.09290500 | 1.52197400  |
| C | 1.05422700  | -1.26503400 | 0.44992500  |
| H | 1.44965700  | -1.25135700 | -0.55016100 |
| N | -0.24829300 | -1.33062700 | 0.78474500  |
| C | -0.31424800 | -1.30033200 | 2.18269000  |
| H | -1.25244100 | -1.34325400 | 2.70874200  |
| C | 5.93924800  | -0.30626800 | -1.18188500 |
| H | 5.75461600  | 0.77509600  | -1.13400900 |
| H | 5.24037100  | -0.69017700 | -1.93554900 |
| C | 5.47764700  | -0.87584600 | 0.15162400  |
| O | 4.27480500  | -0.73997200 | 0.52378900  |
| N | 6.38697700  | -1.51712400 | 0.92072500  |

|    |             |             |             |
|----|-------------|-------------|-------------|
| H  | 6.10579700  | -1.89742500 | 1.81260600  |
| H  | 7.34610500  | -1.63212900 | 0.63450800  |
| C  | -3.14468900 | -3.24885500 | -0.79919300 |
| O  | -2.00462500 | -3.07464100 | -1.41647700 |
| O  | -3.51853900 | -2.26693000 | -0.02894300 |
| C  | -3.97197300 | -4.47095900 | -1.00565900 |
| H  | -4.66719400 | -4.30048000 | -1.83775600 |
| H  | -3.33836200 | -5.32172300 | -1.26180400 |
| H  | -4.56316700 | -4.68550200 | -0.11335500 |
| C  | 1.44303100  | -1.13250100 | 4.10227200  |
| H  | 2.01301400  | -0.21405800 | 4.28605100  |
| H  | 0.59188800  | -1.14072000 | 4.78724400  |
| H  | 2.08654700  | -1.98193700 | 4.36055300  |
| C  | -5.10189500 | 2.80028500  | 1.78124300  |
| H  | -5.63190900 | 3.50514600  | 1.12939900  |
| H  | -5.83829700 | 2.09325900  | 2.17031200  |
| H  | -4.70109900 | 3.36495900  | 2.63176100  |
| C  | 7.39143500  | -0.57899900 | -1.61263100 |
| H  | 7.57732800  | -0.12711900 | -2.59107900 |
| H  | 8.11552400  | -0.14100300 | -0.91508400 |
| H  | 7.59496200  | -1.65206400 | -1.70772000 |
| Fe | -1.75566400 | -1.15364900 | -0.56847300 |
| C  | 0.25638900  | 4.61968200  | -0.95204400 |
| C  | 0.48973200  | 3.65063500  | -1.93915700 |
| C  | 1.29851900  | 2.54066100  | -1.65516300 |
| C  | 1.87877200  | 2.40112000  | -0.38575800 |
| H  | -0.34556400 | 5.49408200  | -1.18213500 |
| H  | 0.05650100  | 3.76589900  | -2.92774300 |
| H  | 1.47308200  | 1.79103300  | -2.41948800 |
| O  | -0.64434000 | -0.44268400 | -1.98007800 |
| O  | -1.92385200 | -0.55604500 | -2.80299000 |
| H  | -1.73767200 | -1.34536100 | -3.36850100 |
| C  | 0.82916400  | 4.47563900  | 0.31966400  |
| H  | 0.66356900  | 5.23315900  | 1.07971500  |
| C  | 1.64062600  | 3.36778900  | 0.60081500  |
| H  | 2.09667100  | 3.26690500  | 1.58079300  |
| H  | 2.52451100  | 1.55380300  | -0.17222800 |

BNZ-FeIII-O-C1-concerted-TS-model2-GAS:

|   |            |             |             |
|---|------------|-------------|-------------|
| C | 4.92727300 | -2.04584800 | 1.15494800  |
| N | 3.95077400 | -3.00766200 | 0.85644400  |
| H | 4.04164800 | -3.99954700 | 1.01702500  |
| C | 2.87959800 | -2.39727000 | 0.28145700  |
| H | 1.99525800 | -2.88625600 | -0.08763200 |
| N | 3.11974600 | -1.08320900 | 0.20245000  |
| C | 4.39072800 | -0.85177300 | 0.73488800  |
| H | 4.82656800 | 0.13169300  | 0.74039800  |
| C | 0.83551100 | 2.35450600  | 2.72451400  |
| N | 0.50742500 | 3.25607700  | 1.70304300  |



|    |             |             |             |
|----|-------------|-------------|-------------|
| H  | 0.09477500  | 4.16703900  | 1.83847300  |
| C  | 0.84576200  | 2.71788400  | 0.49780500  |
| H  | 0.70847800  | 3.18331500  | -0.46330900 |
| N  | 1.37761100  | 1.50498500  | 0.69322300  |
| C  | 1.38223700  | 1.27203400  | 2.07448600  |
| H  | 1.78066600  | 0.36375400  | 2.49146100  |
| C  | -7.83499700 | 0.48870200  | 0.67792800  |
| H  | -8.88919600 | 0.23176700  | 0.83903200  |
| H  | -7.78911600 | 1.58555100  | 0.60916000  |
| C  | -7.35630800 | -0.06683200 | -0.65770100 |
| O  | -6.14072100 | -0.24795600 | -0.91354000 |
| N  | -8.32574700 | -0.33337300 | -1.57818700 |
| H  | -8.05437200 | -0.66394600 | -2.49258600 |
| H  | -9.30610600 | -0.20804400 | -1.38309500 |
| C  | 2.96927400  | 1.87383600  | -2.44802900 |
| O  | 1.67553300  | 1.84458200  | -2.21932100 |
| O  | 3.69793900  | 1.08865200  | -1.72215200 |
| C  | 3.55181100  | 2.72250300  | -3.53203300 |
| H  | 3.54734500  | 2.15462100  | -4.47099500 |
| H  | 2.95391400  | 3.62368700  | -3.68167300 |
| H  | 4.58617000  | 2.98019900  | -3.29780200 |
| C  | 0.57528200  | 2.62474500  | 4.17112500  |
| H  | -0.49392300 | 2.76285600  | 4.37189700  |
| H  | 0.91986900  | 1.78272300  | 4.77598100  |
| H  | 1.10133400  | 3.52121300  | 4.52036700  |
| C  | 6.23384700  | -2.38378000 | 1.78913400  |
| H  | 6.81665600  | -3.08012600 | 1.17415400  |
| H  | 6.83180400  | -1.47816600 | 1.91555700  |
| H  | 6.10440700  | -2.83786800 | 2.77919000  |
| Fe | 1.88634800  | 0.19256700  | -0.87374100 |
| C  | -3.43297700 | -1.68234500 | -0.55321200 |
| C  | -3.04477700 | -0.35558100 | -0.30746000 |
| C  | -1.83164700 | -0.09666500 | 0.32332500  |
| C  | -0.97184300 | -1.16794800 | 0.69295200  |
| H  | -4.39360700 | -1.85531800 | -1.02378100 |
| H  | -3.72117600 | 0.44161900  | -0.58919900 |
| H  | -1.52774600 | 0.92254400  | 0.53349200  |
| O  | 0.32426700  | -0.99711800 | -0.87376500 |
| O  | 1.54695100  | -1.11084600 | -2.32809800 |
| H  | 0.87035500  | -0.90475500 | -3.00791600 |
| C  | -2.60578500 | -2.75735300 | -0.17022500 |
| H  | -2.92342700 | -3.77687000 | -0.35996500 |
| C  | -1.39957600 | -2.50771500 | 0.46762600  |
| H  | -0.76367400 | -3.32849900 | 0.78270100  |
| H  | -0.15385300 | -0.98145000 | 1.37785100  |
| C  | -6.97564300 | 0.00940600  | 1.85688600  |
| H  | -7.27422700 | 0.51404000  | 2.78104500  |
| H  | -7.08113600 | -1.07028100 | 2.00878800  |
| H  | -5.91977600 | 0.21847800  | 1.66435300  |

BNZ-FeIII-O-C1-concerted-INT-model2-GAS (epoxide):

|    |             |             |             |
|----|-------------|-------------|-------------|
| C  | -4.46298300 | 2.10771100  | 0.87426100  |
| N  | -3.36420100 | 2.94851800  | 0.65430500  |
| H  | -3.33790700 | 3.93617100  | 0.85714900  |
| C  | -2.34632100 | 2.22929600  | 0.10964100  |
| H  | -1.37877700 | 2.61884500  | -0.14947200 |
| N  | -2.73550600 | 0.95549000  | -0.03121100 |
| C  | -4.05429300 | 0.86739300  | 0.43459600  |
| H  | -4.58845800 | -0.06592800 | 0.39908400  |
| C  | 0.23180200  | -1.22669200 | 3.03962300  |
| N  | 0.39754300  | -2.48602400 | 2.44816900  |
| H  | 0.85848100  | -3.27584200 | 2.87353700  |
| C  | -0.14945000 | -2.47414400 | 1.20042200  |
| H  | -0.16421700 | -3.29984100 | 0.51098600  |
| N  | -0.66633100 | -1.26387800 | 0.95861200  |
| C  | -0.43256500 | -0.48037900 | 2.09573200  |
| H  | -0.74678000 | 0.54629600  | 2.14424100  |
| C  | 6.04563200  | 0.52970500  | -0.66111200 |
| H  | 5.37930500  | 1.33916600  | -0.34933400 |
| H  | 6.03846500  | 0.53093500  | -1.76116400 |
| C  | 5.38455500  | -0.76358900 | -0.20193600 |
| O  | 4.14942700  | -0.82944700 | 0.03101700  |
| N  | 6.18311400  | -1.86045000 | -0.08916900 |
| H  | 5.76688300  | -2.74020900 | 0.17722600  |
| H  | 7.17438200  | -1.83097000 | -0.26391500 |
| C  | -2.69926900 | -2.87585700 | -1.33019800 |
| O  | -1.40474600 | -2.80411700 | -1.38831300 |
| O  | -3.32787900 | -1.81578300 | -0.90080300 |
| C  | -3.43766300 | -4.09957000 | -1.79508000 |
| H  | -3.83781000 | -3.91886000 | -2.80021600 |
| H  | -2.76478500 | -4.95699400 | -1.83477300 |
| H  | -4.28483300 | -4.30687600 | -1.13643000 |
| C  | 0.72517400  | -0.89150400 | 4.40995600  |
| H  | 1.81308600  | -1.00559900 | 4.48985900  |
| H  | 0.48207900  | 0.14648400  | 4.64951800  |
| H  | 0.26396200  | -1.52529300 | 5.17705600  |
| C  | -5.73060200 | 2.61185400  | 1.48560300  |
| H  | -6.18572700 | 3.40603000  | 0.88151900  |
| H  | -6.45825400 | 1.80059900  | 1.56415500  |
| H  | -5.56492100 | 3.00785100  | 2.49494900  |
| C  | 7.47592000  | 0.78302200  | -0.15131800 |
| H  | 7.81204800  | 1.77795600  | -0.45919800 |
| H  | 7.52739200  | 0.73484100  | 0.94159400  |
| H  | 8.19921200  | 0.06647700  | -0.55984900 |
| Fe | -1.54746700 | -0.59352200 | -0.84007000 |
| C  | 2.17704400  | 3.04411200  | 0.22656800  |
| C  | 1.47725800  | 3.68139500  | -0.88162200 |
| C  | 0.91142600  | 2.95272000  | -1.87896700 |
| C  | 0.87624800  | 1.48706200  | -1.79665900 |

|   |             |             |             |
|---|-------------|-------------|-------------|
| H | 2.68117500  | 3.68261500  | 0.94532300  |
| H | 1.49688300  | 4.76524500  | -0.94301800 |
| H | 0.51091100  | 3.42629100  | -2.76896700 |
| O | 0.07557800  | 0.91789400  | -0.61437300 |
| O | -1.33058600 | -0.28570300 | -2.63002100 |
| H | -1.44243100 | -0.90590500 | -3.37284600 |
| C | 2.30178000  | 1.69447100  | 0.30650600  |
| H | 2.94636900  | 1.21315300  | 1.03062900  |
| C | 1.61223000  | 0.82690500  | -0.65689500 |
| H | 1.96171000  | -0.19317000 | -0.74912300 |
| H | 0.64446700  | 0.91628700  | -2.68641200 |

*Separate reactants*

BNZ-GAS:

|   |             |             |             |
|---|-------------|-------------|-------------|
| C | 0.77076500  | 1.16928100  | 0.00000100  |
| C | 1.39800800  | -0.08288500 | -0.00000800 |
| C | 0.62724700  | -1.25214200 | 0.00000900  |
| C | -0.77078500 | -1.16926800 | -0.00000100 |
| C | -1.39801000 | 0.08286100  | -0.00000700 |
| C | -0.62722500 | 1.25215300  | 0.00000600  |
| H | 1.36836000  | 2.07579100  | 0.00000200  |
| H | 2.48187000  | -0.14709500 | -0.00000900 |
| H | 1.11350500  | -2.22293000 | 0.00001000  |
| H | -1.36832400 | -2.07581400 | -0.00000100 |
| H | -2.48186700 | 0.14713700  | -0.00000600 |
| H | -1.11354300 | 2.22291100  | 0.00000800  |

Asn-GAS:

|   |             |             |             |
|---|-------------|-------------|-------------|
| C | 0.69291600  | -0.72436500 | 0.21426700  |
| H | 0.59863000  | -1.64963200 | -0.37013400 |
| H | 0.74215700  | -1.02928300 | 1.27055700  |
| C | -0.56200300 | 0.12696000  | 0.04225100  |
| O | -0.54199900 | 1.37505600  | 0.07699700  |
| N | -1.73046700 | -0.57130500 | -0.12486500 |
| H | -2.59359200 | -0.05539800 | -0.20607200 |
| H | -1.75884300 | -1.57671300 | -0.17310100 |
| C | 1.96905000  | 0.03412200  | -0.16770900 |
| H | 2.01568500  | 0.98513600  | 0.36925400  |
| H | 2.85902600  | -0.55621300 | 0.07389300  |
| H | 1.98642300  | 0.26049100  | -1.23917000 |

FeIII+ligands-GAS:

|   |             |             |             |
|---|-------------|-------------|-------------|
| C | -3.32676100 | -1.45326300 | -0.69608500 |
| N | -3.39348000 | -1.51663500 | 0.70444900  |
| H | -4.13231200 | -1.95649800 | 1.23349100  |
| C | -2.32713900 | -0.86735800 | 1.23824000  |

|    |             |             |             |
|----|-------------|-------------|-------------|
| H  | -2.13345200 | -0.73465800 | 2.28876000  |
| N  | -1.56698100 | -0.39217800 | 0.23983400  |
| C  | -2.18194400 | -0.74409300 | -0.96652300 |
| H  | -1.77727400 | -0.43438800 | -1.91399700 |
| C  | 2.77304400  | -2.47137600 | -0.16491200 |
| N  | 3.61858200  | -1.35250000 | -0.19435300 |
| H  | 4.62005700  | -1.38215200 | -0.32011500 |
| C  | 2.88565900  | -0.22287400 | -0.02404700 |
| H  | 3.26977000  | 0.78278400  | -0.00619100 |
| N  | 1.59458500  | -0.56242900 | 0.11561600  |
| C  | 1.51399200  | -1.95792500 | 0.02994400  |
| H  | 0.57541600  | -2.47683000 | 0.11008300  |
| C  | 0.56714000  | 2.67380100  | -1.10709900 |
| O  | 1.33219700  | 2.41230600  | -0.07412900 |
| O  | -0.44162200 | 1.86923300  | -1.26896100 |
| O  | -0.04878300 | 0.99209900  | 2.37331000  |
| O  | -0.94807800 | 2.17770200  | 2.04337700  |
| H  | -0.42863900 | 2.93667100  | 2.40257800  |
| C  | 0.81023400  | 3.83424800  | -2.00417300 |
| H  | 0.26922600  | 4.70801000  | -1.61834400 |
| H  | 1.87245800  | 4.08333300  | -2.03380400 |
| H  | 0.43413200  | 3.62534800  | -3.00735300 |
| C  | 3.26062700  | -3.87192600 | -0.32534500 |
| H  | 3.97330400  | -4.14673300 | 0.46127000  |
| H  | 2.42103500  | -4.56839900 | -0.26847600 |
| H  | 3.75291300  | -4.02324400 | -1.29332100 |
| C  | -4.34911500 | -2.06432800 | -1.59144200 |
| H  | -5.34568500 | -1.63994000 | -1.42059400 |
| H  | -4.08754600 | -1.87957200 | -2.63582800 |
| H  | -4.41845100 | -3.14997900 | -1.45265200 |
| Fe | 0.09469200  | 0.78008800  | 0.48059800  |

### *Naphthalene Model 1*

NPY-FeIII-RC:

|   |           |            |            |
|---|-----------|------------|------------|
| C | 3.4279880 | 3.4446530  | 0.2902520  |
| N | 2.6686650 | 3.6305570  | -0.8565490 |
| H | 2.7045370 | 4.4462080  | -1.4583800 |
| C | 1.8687650 | 2.5661020  | -1.0388290 |
| H | 1.1674250 | 2.4558360  | -1.8513650 |
| N | 2.0712720 | 1.6848700  | -0.0609520 |
| C | 3.0375170 | 2.2248200  | 0.7740720  |
| H | 3.3723440 | 1.7060140  | 1.6594040  |
| C | 4.5200840 | -2.1227840 | -1.4887640 |
| N | 3.7238130 | -3.1818790 | -1.0762510 |
| H | 3.9572430 | -4.1645960 | -1.1715860 |
| C | 2.5980800 | -2.7055370 | -0.5214460 |
| H | 1.8097100 | -3.3131140 | -0.1055250 |
| N | 2.6160140 | -1.3730650 | -0.5531590 |

|    |            |            |            |
|----|------------|------------|------------|
| C  | 3.8093800  | -1.0012890 | -1.1563870 |
| H  | 4.0748740  | 0.0346340  | -1.2989410 |
| C  | 0.6660990  | -1.0863000 | 2.3952050  |
| O  | 1.1989170  | 0.0621920  | 2.2573260  |
| O  | 0.3384380  | -1.7115070 | 1.3249680  |
| C  | -3.2181230 | -1.3877150 | 0.9745460  |
| C  | -3.9348520 | -0.6444420 | 1.9507720  |
| C  | -4.9927530 | 0.1527800  | 1.5757750  |
| C  | -5.3872820 | 0.2521230  | 0.2117420  |
| C  | -4.6640370 | -0.4943040 | -0.7769860 |
| C  | -3.5756370 | -1.3120910 | -0.3585570 |
| H  | -2.3910180 | -2.0229890 | 1.2797660  |
| H  | -3.6477440 | -0.7144280 | 2.9963790  |
| H  | -5.5455670 | 0.7199330  | 2.3208670  |
| O  | -0.2222670 | 0.0728200  | -1.1253430 |
| O  | -1.0000600 | 0.7318470  | -0.0953850 |
| H  | -1.7083290 | 0.0669860  | 0.0820160  |
| H  | 0.5883690  | -2.7530330 | 3.7330060  |
| H  | 1.0276580  | -1.1918530 | 4.5047960  |
| H  | -0.6471330 | -1.5148240 | 4.0037580  |
| Fe | 1.1189310  | -0.1428080 | 0.1629150  |
| C  | 0.4078170  | -1.6747710 | 3.7466620  |
| C  | 5.8500500  | -2.3089230 | -2.1347630 |
| H  | 6.5344100  | -2.8715940 | -1.4884680 |
| H  | 5.7633930  | -2.8533270 | -3.0828930 |
| H  | 6.3024570  | -1.3356930 | -2.3423470 |
| H  | 5.2179500  | 4.6108870  | 0.0431350  |
| H  | 3.9480280  | 5.4121740  | 0.9820550  |
| H  | 4.8805700  | 4.0891530  | 1.7031120  |
| C  | 4.4202440  | 4.4437940  | 0.7771490  |
| C  | -5.0580790 | -0.3967010 | -2.1391070 |
| C  | -6.1194070 | 0.4008830  | -2.5085190 |
| C  | -6.4763420 | 1.0662700  | -0.2032950 |
| C  | -6.8345810 | 1.1387170  | -1.5319460 |
| H  | -3.0359570 | -1.8882380 | -1.1070280 |
| H  | -7.6695970 | 1.7633880  | -1.8372480 |
| H  | -7.0230600 | 1.6309690  | 0.5481020  |
| H  | -4.5077000 | -0.9646240 | -2.8854740 |
| H  | -6.4132340 | 0.4672390  | -3.5525430 |

NPY-FeIII-O-C1-concerted-TS-model1:

|   |             |             |            |
|---|-------------|-------------|------------|
| C | -2.05200000 | -1.27100000 | 3.20200000 |
| N | -2.35500000 | -2.43400000 | 2.51200000 |
| H | -2.76400000 | -3.26900000 | 2.91800000 |
| C | -2.03600000 | -2.27600000 | 1.21500000 |
| H | -2.17800000 | -3.02200000 | 0.45000000 |
| N | -1.53200000 | -1.06000000 | 1.01700000 |
| C | -1.54000000 | -0.42600000 | 2.25100000 |
| H | -1.19200000 | 0.58800000  | 2.37100000 |

|    |             |             |             |
|----|-------------|-------------|-------------|
| C  | -2.93600000 | -1.28800000 | -2.07400000 |
| O  | -2.96500000 | -0.06200000 | -1.75200000 |
| O  | -1.90000000 | -1.97200000 | -1.74200000 |
| C  | 3.24700000  | -0.23000000 | 0.50900000  |
| C  | 4.26800000  | -0.74100000 | -0.34900000 |
| C  | 4.08500000  | -2.02200000 | -0.96000000 |
| C  | 2.95600000  | -2.77200000 | -0.73400000 |
| C  | 1.92800000  | -2.26500000 | 0.09800000  |
| C  | 2.04700000  | -0.99800000 | 0.68500000  |
| H  | 4.87600000  | -2.40400000 | -1.60200000 |
| H  | 2.84100000  | -3.74900000 | -1.19200000 |
| H  | 1.05500000  | -2.87100000 | 0.30700000  |
| H  | 1.31900000  | -0.66900000 | 1.41800000  |
| C  | 5.44500000  | 0.01900000  | -0.54700000 |
| C  | 5.61400000  | 1.23500000  | 0.09000000  |
| H  | 6.52200000  | 1.80900000  | -0.06800000 |
| C  | 4.61400000  | 1.72900000  | 0.95300000  |
| H  | 4.76300000  | 2.67800000  | 1.46200000  |
| C  | 3.45000000  | 1.00700000  | 1.16100000  |
| H  | 2.68400000  | 1.38200000  | 1.83500000  |
| H  | 6.21800000  | -0.37100000 | -1.20500000 |
| O  | 0.90000000  | -0.61500000 | -1.04700000 |
| O  | 0.03000000  | 0.08100000  | -2.57000000 |
| H  | 0.43700000  | 0.96400000  | -2.51700000 |
| Fe | -0.97500000 | -0.31000000 | -0.90600000 |
| C  | -2.30400000 | -1.11100000 | 4.66300000  |
| H  | -3.37200000 | -1.19700000 | 4.89800000  |
| H  | -1.77200000 | -1.87100000 | 5.24900000  |
| H  | -1.96300000 | -0.12700000 | 4.99600000  |
| C  | -4.04800000 | -1.93200000 | -2.84600000 |
| H  | -3.75900000 | -1.98100000 | -3.90400000 |
| H  | -4.21200000 | -2.95600000 | -2.49900000 |
| H  | -4.96800000 | -1.34900000 | -2.76300000 |
| C  | -1.80600000 | 3.83400000  | -0.01700000 |
| N  | -0.42600000 | 3.79500000  | 0.11600000  |
| H  | 0.17000000  | 4.59400000  | 0.30700000  |
| C  | 0.00200000  | 2.53000000  | -0.06600000 |
| H  | 1.03600000  | 2.22400000  | -0.03100000 |
| N  | -1.03700000 | 1.73500000  | -0.30800000 |
| C  | -2.16700000 | 2.53800000  | -0.28100000 |
| H  | -3.14900000 | 2.12900000  | -0.46800000 |
| C  | -2.60000000 | 5.09100000  | 0.11000000  |
| H  | -2.48000000 | 5.54600000  | 1.10100000  |
| H  | -2.29400000 | 5.83400000  | -0.63700000 |
| H  | -3.66100000 | 4.87500000  | -0.04000000 |

***Naphthalene Model 1 GAS***

NPY-FeIII-RC-model1-GAS:

|    |            |            |            |
|----|------------|------------|------------|
| C  | 3.3509350  | 3.4508880  | 0.4825930  |
| N  | 2.4623520  | 3.7395590  | -0.5644260 |
| H  | 2.4009130  | 4.6218570  | -1.0509230 |
| C  | 1.6762980  | 2.6566860  | -0.8014250 |
| H  | 0.8908260  | 2.5980470  | -1.5350550 |
| N  | 2.0242830  | 1.6771340  | 0.0446950  |
| C  | 3.0576960  | 2.1610860  | 0.8531520  |
| H  | 3.4781270  | 1.5650040  | 1.6440210  |
| C  | 4.4759190  | -1.9749220 | -1.7034090 |
| N  | 3.7305180  | -3.0794310 | -1.2669470 |
| H  | 3.9877690  | -4.0464660 | -1.4008990 |
| C  | 2.6071080  | -2.6483520 | -0.6365500 |
| H  | 1.8541510  | -3.2748070 | -0.1901310 |
| N  | 2.5919380  | -1.3071910 | -0.6471020 |
| C  | 3.7478760  | -0.8789350 | -1.3102050 |
| H  | 3.9687600  | 0.1646180  | -1.4455920 |
| C  | 0.7999040  | -1.2968110 | 2.4023420  |
| O  | 1.3529300  | -0.1265870 | 2.2984530  |
| O  | 0.4104930  | -1.8430090 | 1.2747150  |
| C  | -3.1373480 | -1.4845660 | 0.7825240  |
| C  | -3.9533760 | -1.0003750 | 1.8431870  |
| C  | -5.0593250 | -0.2221180 | 1.5688300  |
| C  | -5.4078070 | 0.1150090  | 0.2281270  |
| C  | -4.5860500 | -0.3702160 | -0.8473960 |
| C  | -3.4494870 | -1.1739270 | -0.5336580 |
| H  | -2.2822380 | -2.1164690 | 1.0038590  |
| H  | -3.7084900 | -1.2578810 | 2.8684370  |
| H  | -5.6868120 | 0.1427320  | 2.3767100  |
| O  | -0.2433760 | 0.1677200  | -1.1391160 |
| O  | -0.9778180 | 0.7523350  | 0.0625640  |
| H  | -1.7839160 | 0.1599800  | 0.1312700  |
| H  | 0.5510660  | -3.0441690 | 3.6026630  |
| H  | 1.3774130  | -1.6734300 | 4.4171450  |
| H  | -0.3674050 | -1.6278210 | 4.1396730  |
| Fe | 1.1026040  | -0.1522980 | 0.1779880  |
| C  | 0.5898340  | -1.9595710 | 3.7173230  |
| C  | 5.7766960  | -2.0930110 | -2.4218820 |
| H  | 6.5316280  | -2.6080120 | -1.8158060 |
| H  | 5.6731540  | -2.6410960 | -3.3659420 |
| H  | 6.1638350  | -1.0992280 | -2.6582850 |
| H  | 5.0725890  | 4.7186280  | 0.2149960  |
| H  | 3.8873280  | 5.3338620  | 1.3797470  |
| H  | 4.9268010  | 3.9738370  | 1.8113200  |
| C  | 4.3586730  | 4.4223460  | 0.9930990  |
| C  | -4.9358810 | -0.0398400 | -2.1867890 |
| C  | -6.0475470 | 0.7347070  | -2.4532850 |
| C  | -6.5455370 | 0.9124020  | -0.0816650 |
| C  | -6.8587440 | 1.2150310  | -1.3919390 |
| H  | -2.8422930 | -1.5611840 | -1.3477290 |
| H  | -7.7300410 | 1.8208140  | -1.6172800 |

|   |            |            |            |
|---|------------|------------|------------|
| H | -7.1666460 | 1.2768800  | 0.7310960  |
| H | -4.3158350 | -0.4112110 | -2.9975480 |
| H | -6.3088960 | 0.9780100  | -3.4777640 |

NPY-FeIII-O-C1-concerted-TS-model1-GAS:

|    |            |            |            |
|----|------------|------------|------------|
| C  | -1.3432530 | 3.9004470  | -0.1348450 |
| N  | 0.0330280  | 3.6723030  | -0.0005890 |
| H  | 0.7276480  | 4.3842840  | 0.1694010  |
| C  | 0.2880260  | 2.3438000  | -0.1629520 |
| H  | 1.2648010  | 1.8917620  | -0.1212700 |
| N  | -0.8673690 | 1.7048380  | -0.3899390 |
| C  | -1.8885680 | 2.6606180  | -0.3789320 |
| H  | -2.9085450 | 2.3796650  | -0.5753040 |
| C  | -1.8573290 | -1.0048210 | 3.3391170  |
| N  | -2.2276680 | -2.2138660 | 2.7381940  |
| H  | -2.6119430 | -3.0125190 | 3.2210860  |
| C  | -2.0067200 | -2.1378820 | 1.3972320  |
| H  | -2.2260400 | -2.9089230 | 0.6790460  |
| N  | -1.5032460 | -0.9314780 | 1.1020650  |
| C  | -1.4053130 | -0.2199240 | 2.3040190  |
| H  | -1.0461480 | 0.7933200  | 2.3316740  |
| C  | -3.3116350 | -1.1199780 | -1.8104110 |
| O  | -3.1190600 | 0.1400510  | -1.5723790 |
| O  | -2.3370800 | -1.9283640 | -1.4689750 |
| C  | 3.2060720  | -0.4065620 | 0.4866770  |
| C  | 4.2081690  | -0.7923640 | -0.4626320 |
| C  | 4.0325910  | -2.0071480 | -1.2046500 |
| C  | 2.9277850  | -2.8056000 | -1.0246300 |
| C  | 1.9135390  | -2.4163570 | -0.1077320 |
| C  | 2.0409320  | -1.2279830 | 0.6285900  |
| H  | 4.8058700  | -2.2959170 | -1.9101820 |
| H  | 2.8136560  | -3.7251230 | -1.5861520 |
| H  | 1.0643060  | -3.0667410 | 0.0597870  |
| H  | 1.3163780  | -0.9853430 | 1.3976590  |
| C  | 5.3583920  | 0.0215100  | -0.6167700 |
| C  | 5.5224610  | 1.1689990  | 0.1443700  |
| H  | 6.4102050  | 1.7797620  | 0.0217440  |
| C  | 4.5433260  | 1.5392270  | 1.0945320  |
| H  | 4.6944390  | 2.4249730  | 1.7028240  |
| C  | 3.4048220  | 0.7637420  | 1.2624430  |
| H  | 2.6637820  | 1.0329910  | 2.0110590  |
| H  | 6.1169810  | -0.2704240 | -1.3363810 |
| O  | 0.7778170  | -0.8226220 | -1.1325050 |
| O  | -0.1789090 | -0.1963480 | -2.6287670 |
| H  | 0.4377400  | 0.5224670  | -2.8779160 |
| Fe | -1.0966090 | -0.3253420 | -0.8832040 |
| C  | -1.9560360 | 5.2562750  | -0.0212230 |
| H  | -1.7790900 | 5.7046260  | 0.9639460  |
| H  | -1.5644570 | 5.9451970  | -0.7793170 |



|   |            |            |            |
|---|------------|------------|------------|
| H | -3.0368690 | 5.1888770  | -0.1649880 |
| C | -1.9945600 | -0.7459910 | 4.8013810  |
| H | -3.0383520 | -0.8165590 | 5.1302320  |
| H | -1.4067280 | -1.4529710 | 5.3991190  |
| H | -1.6419260 | 0.2605160  | 5.0387080  |
| C | -4.5470830 | -1.6338350 | -2.4656950 |
| H | -4.3637790 | -1.7369850 | -3.5427520 |
| H | -4.8045130 | -2.6223870 | -2.0791130 |
| H | -5.3746510 | -0.9370320 | -2.3240450 |

### **Oxygen-oxygen bond cleavage**

NBZ-OO-cleavage-TS-modell1:

|   |             |             |             |
|---|-------------|-------------|-------------|
| C | -2.11725000 | -1.21556300 | 4.34225200  |
| N | -2.72735100 | -0.91393600 | 3.13255500  |
| H | -3.72504300 | -0.94295800 | 2.95252200  |
| C | -1.78643900 | -0.59118900 | 2.22842400  |
| H | -1.98529400 | -0.31687800 | 1.20407100  |
| N | -0.58301900 | -0.66438000 | 2.79189100  |
| C | -0.77623100 | -1.05774200 | 4.10637000  |
| H | 0.05483800  | -1.20212800 | 4.77968600  |
| C | 1.33186100  | 3.51868100  | 3.60543100  |
| N | 2.63725400  | 3.36487300  | 3.16072300  |
| H | 3.37335100  | 4.05776600  | 3.24302200  |
| C | 2.77969600  | 2.15005700  | 2.60524800  |
| H | 3.69118200  | 1.76987700  | 2.17269100  |
| N | 1.62378700  | 1.49265900  | 2.66976700  |
| C | 0.71346900  | 2.33896600  | 3.28611800  |
| H | -0.30940200 | 2.04354900  | 3.45945200  |
| C | 3.31256800  | -1.45365400 | 2.49115800  |
| O | 2.18308100  | -1.62457500 | 3.07191000  |
| O | 3.35686700  | -0.60944400 | 1.53830800  |
| C | 4.89772800  | -0.52579900 | -4.00355100 |
| C | 5.92474700  | -0.88094300 | -4.87347600 |
| C | 6.44753900  | -2.17842100 | -4.85152100 |
| C | 5.94503600  | -3.13143600 | -3.95911900 |
| C | 4.91632900  | -2.79655000 | -3.08274700 |
| C | 4.41067900  | -1.49422100 | -3.12148000 |
| N | 3.33339000  | -1.12492200 | -2.21255000 |
| O | 2.87779100  | -2.01374600 | -1.46728300 |
| O | 2.91725100  | 0.02810600  | -2.21457400 |
| H | 4.47606100  | 0.47175100  | -4.00377300 |
| H | 6.31625900  | -0.14532700 | -5.56897600 |
| H | 7.24930300  | -2.44838000 | -5.53248500 |
| H | 6.35364300  | -4.13689100 | -3.94557800 |
| H | 4.51220500  | -3.51914400 | -2.38487200 |
| O | 0.57671300  | 0.33904900  | 0.29257300  |
| O | 0.87534300  | -1.51725300 | 0.32558400  |

|    |             |             |             |
|----|-------------|-------------|-------------|
| H  | 1.60640200  | -1.48572600 | -0.35384700 |
| H  | 5.43468500  | -1.71870700 | 2.63971900  |
| H  | 4.48585100  | -2.49703000 | 3.95209300  |
| H  | 4.50365900  | -3.19785400 | 2.32327100  |
| Fe | 1.22619900  | -0.33569000 | 1.78231200  |
| C  | 4.51604600  | -2.25594700 | 2.88653900  |
| C  | 0.84391200  | 4.75725100  | 4.27997300  |
| H  | 1.37758100  | 4.93844000  | 5.22098300  |
| H  | 0.98032800  | 5.63995500  | 3.64391600  |
| H  | -0.22131500 | 4.66288500  | 4.50647000  |
| H  | -3.59155100 | -0.82814700 | 5.86032500  |
| H  | -3.46311600 | -2.52979400 | 5.38473400  |
| H  | -2.20213900 | -1.79408800 | 6.38881400  |
| C  | -2.88737300 | -1.61223800 | 5.55664100  |

NBZ-OO-cleavage-TS-model2:

|   |             |             |             |
|---|-------------|-------------|-------------|
| C | -2.11481000 | -1.22420400 | 4.34139900  |
| N | -2.72388400 | -0.91688000 | 3.13200700  |
| H | -3.72248100 | -0.93527000 | 2.95422100  |
| C | -1.78362800 | -0.60109100 | 2.22691300  |
| H | -1.98242900 | -0.32302400 | 1.20361600  |
| N | -0.57887100 | -0.68531400 | 2.78962200  |
| C | -0.77299100 | -1.07825700 | 4.10471500  |
| H | 0.05758700  | -1.22886600 | 4.77713700  |
| C | 1.32497300  | 3.52256400  | 3.59346900  |
| N | 2.62489300  | 3.37488000  | 3.12918100  |
| H | 3.35827200  | 4.07215500  | 3.20146400  |
| C | 2.76635200  | 2.16340900  | 2.56999900  |
| H | 3.67325600  | 1.78820700  | 2.12371100  |
| N | 1.61307900  | 1.50012500  | 2.65120300  |
| C | 0.70645100  | 2.34129800  | 3.28158400  |
| H | -0.31235600 | 2.04118400  | 3.46987900  |
| C | 0.35801700  | 6.09433100  | -3.29417100 |
| H | -0.25224700 | 5.20859800  | -3.07669000 |
| H | 0.91814600  | 5.85610000  | -4.20994100 |
| C | 1.38025200  | 6.28729600  | -2.17407900 |
| O | 1.67801500  | 7.39243100  | -1.72499300 |
| N | 1.93592700  | 5.13391000  | -1.70483900 |
| H | 2.72928900  | 5.21338400  | -1.08140200 |
| H | 1.80557100  | 4.24238400  | -2.17160700 |
| C | 3.31467600  | -1.45154200 | 2.49311700  |
| O | 2.19120400  | -1.59821900 | 3.09296600  |
| O | 3.34689900  | -0.62730700 | 1.52071100  |
| C | 1.63703600  | -0.31648100 | -3.74283600 |
| C | 1.69665300  | -1.68105200 | -4.02350200 |
| C | 2.52225100  | -2.51951600 | -3.26989200 |
| C | 3.30289900  | -1.99720500 | -2.23008600 |
| C | 3.26136900  | -0.63366400 | -1.93854700 |
| C | 2.42111100  | 0.18244300  | -2.70274100 |

|    |             |             |             |
|----|-------------|-------------|-------------|
| N  | 2.35914100  | 1.61021000  | -2.38988600 |
| O  | 3.09046500  | 2.05043500  | -1.50306700 |
| O  | 1.57188000  | 2.31204900  | -3.03652100 |
| H  | 0.99999300  | 0.34899000  | -4.31204300 |
| H  | 1.09568800  | -2.08741400 | -4.83081500 |
| H  | 2.56317200  | -3.58130900 | -3.49366100 |
| H  | 3.95167900  | -2.64874000 | -1.65267100 |
| H  | 3.85914700  | -0.20878100 | -1.14170800 |
| O  | 0.56875700  | 0.30552400  | 0.29159700  |
| O  | 0.90361600  | -1.54652000 | 0.33187900  |
| H  | 1.61957600  | -1.45272300 | -0.33390500 |
| H  | 5.43516700  | -1.73279800 | 2.61300100  |
| H  | 4.50035400  | -2.47318500 | 3.95744700  |
| H  | 4.48507200  | -3.21018800 | 2.34500000  |
| Fe | 1.22096800  | -0.33128900 | 1.80518000  |
| C  | 4.51603700  | -2.25594500 | 2.88653600  |
| C  | 0.84391100  | 4.75726300  | 4.27997500  |
| H  | 1.39243800  | 4.93546700  | 5.21289200  |
| H  | 0.96859900  | 5.64188700  | 3.64443100  |
| H  | -0.21739100 | 4.65910000  | 4.52228600  |
| C  | -0.52136800 | 7.32213600  | -3.52063600 |
| H  | -3.58405100 | -0.82108200 | 5.85893600  |
| H  | -3.47145600 | -2.52459900 | 5.38572200  |
| H  | -2.20326300 | -1.79902600 | 6.38855600  |
| H  | 0.08773500  | 8.20455000  | -3.73783000 |
| H  | -1.20197000 | 7.15623000  | -4.36318300 |
| H  | -1.12603200 | 7.54766000  | -2.63508200 |
| C  | -2.88736700 | -1.61223700 | 5.55663500  |

NBZ-OO-cleavage-TS-model3:

|   |             |             |             |
|---|-------------|-------------|-------------|
| C | -2.11443500 | -1.20956000 | 4.34551400  |
| N | -2.72660600 | -0.86399100 | 3.14903400  |
| H | -3.72647300 | -0.85779600 | 2.97954900  |
| C | -1.78481800 | -0.54594900 | 2.24367300  |
| H | -1.98608900 | -0.24067700 | 1.22877900  |
| N | -0.57891800 | -0.66478000 | 2.79303800  |
| C | -0.77139300 | -1.08269800 | 4.10002300  |
| H | 0.06172100  | -1.26404900 | 4.76169000  |
| C | 1.33753900  | 3.51776400  | 3.61131000  |
| N | 2.64251400  | 3.36823500  | 3.16463700  |
| H | 3.37445600  | 4.06641500  | 3.23903100  |
| C | 2.78896500  | 2.15279100  | 2.61153000  |
| H | 3.70133200  | 1.77608300  | 2.17786800  |
| N | 1.63609800  | 1.49010200  | 2.68024000  |
| C | 0.72381000  | 2.33440200  | 3.29655900  |
| H | -0.29773600 | 2.03620500  | 3.47197900  |
| C | 0.09336700  | 5.95281300  | -3.80824700 |
| H | -0.64345900 | 5.27987100  | -4.26363300 |
| H | 0.90675200  | 6.05535400  | -4.54118300 |

|    |             |             |             |
|----|-------------|-------------|-------------|
| C  | 0.69212900  | 5.29669800  | -2.56349600 |
| O  | 1.08363700  | 5.94575300  | -1.59411700 |
| N  | 0.77688300  | 3.94037300  | -2.61531500 |
| H  | 1.24935300  | 3.45359500  | -1.86445400 |
| H  | 0.50104500  | 3.39848900  | -3.42553700 |
| C  | 3.31541000  | -1.45662200 | 2.47067400  |
| O  | 2.17578700  | -1.64827700 | 3.02827600  |
| O  | 3.37453400  | -0.58534400 | 1.54657600  |
| C  | -1.06310800 | -0.26130700 | -6.23445600 |
| C  | -1.53720000 | -1.42791100 | -6.82767400 |
| C  | -1.36150300 | -2.66173000 | -6.19263600 |
| C  | -0.70858100 | -2.73716000 | -4.95777400 |
| C  | -0.22314500 | -1.58239300 | -4.35114400 |
| C  | -0.40900800 | -0.36004400 | -5.00312500 |
| N  | 0.08014900  | 0.86105900  | -4.37595600 |
| O  | 0.76747800  | 0.78080900  | -3.34737900 |
| O  | -0.21671300 | 1.94295400  | -4.88687700 |
| H  | -1.18902900 | 0.70390100  | -6.70880000 |
| H  | -2.04359000 | -1.37315700 | -7.78601700 |
| H  | -1.73669900 | -3.56710000 | -6.66034500 |
| H  | -0.57929600 | -3.69535900 | -4.46464100 |
| H  | 0.27699200  | -1.62648500 | -3.39233900 |
| O  | 0.52561800  | 0.38889300  | 0.31706400  |
| O  | 0.90146500  | -1.45435300 | 0.27755000  |
| H  | 1.54003500  | -1.29522100 | -0.49613700 |
| H  | 5.41167000  | -1.91143000 | 2.36656600  |
| H  | 4.65601200  | -2.17732000 | 3.96978900  |
| H  | 4.33944400  | -3.31260400 | 2.65444800  |
| Fe | 1.22862300  | -0.32592600 | 1.76699800  |
| C  | 4.51604600  | -2.25594800 | 2.88653900  |
| C  | 0.84391200  | 4.75725300  | 4.27997300  |
| H  | 1.38249700  | 4.95074400  | 5.21570100  |
| H  | 0.96829800  | 5.63545400  | 3.63533000  |
| H  | -0.21897600 | 4.65564800  | 4.51421800  |
| C  | -0.52137000 | 7.32215000  | -3.52064300 |
| H  | -3.57331900 | -0.81898300 | 5.87769000  |
| H  | -3.48317300 | -2.51421700 | 5.37103000  |
| H  | -2.20276200 | -1.82346000 | 6.38238300  |
| H  | 0.21153500  | 7.98298700  | -3.04871300 |
| H  | -0.86717100 | 7.79244000  | -4.44781900 |
| H  | -1.37884900 | 7.23900100  | -2.84291100 |
| C  | -2.88737300 | -1.61223800 | 5.55664100  |
| O  | 2.43599500  | -0.99855100 | -1.81265100 |
| H  | 2.69770800  | -1.77066500 | -2.34260600 |
| H  | 1.92713300  | -0.42073900 | -2.41465700 |

NBZ-OO-cleavage-TS-model4:

|   |             |             |             |
|---|-------------|-------------|-------------|
| C | -1.69396700 | -5.96491700 | -0.90838900 |
| H | -0.94819600 | -6.65659000 | -1.31846000 |
| H | -2.47219000 | -5.88144200 | -1.67763400 |
| C | -1.01132000 | -4.60288200 | -0.84791700 |
| O | -0.47549700 | -4.13438400 | -1.87063400 |
| N | -1.02805900 | -3.94759300 | 0.32719000  |
| H | -0.54920500 | -3.05388800 | 0.42339000  |
| H | -1.41111600 | -4.36831400 | 1.16198100  |
| C | -2.11264500 | -1.13799900 | 4.37733600  |
| N | -2.71870300 | -0.59669300 | 3.25362500  |
| H | -3.71677100 | -0.46834200 | 3.12732000  |
| C | -1.77236700 | -0.26506300 | 2.35699000  |
| H | -1.96768000 | 0.17314400  | 1.39065300  |
| N | -0.57153100 | -0.56192600 | 2.84618100  |
| C | -0.77018300 | -1.10885900 | 4.10162400  |
| H | 0.05831400  | -1.44349900 | 4.70722400  |
| C | 1.33657800  | 3.55115000  | 3.55121400  |
| N | 2.58896000  | 3.47126200  | 2.95809600  |
| H | 3.28597300  | 4.20809500  | 2.94886600  |
| C | 2.73769200  | 2.26283500  | 2.38928300  |
| H | 3.61573400  | 1.93495600  | 1.85562600  |
| N | 1.63736400  | 1.53890900  | 2.58625300  |
| C | 0.75817200  | 2.33509200  | 3.30624900  |
| H | -0.21579500 | 1.98258300  | 3.60376700  |
| C | -0.23395300 | 5.82486900  | -3.65279100 |
| H | -1.05657600 | 5.31102500  | -4.16596800 |
| H | 0.65603100  | 5.66734400  | -4.27906300 |
| C | 0.03033300  | 5.13856800  | -2.31131100 |
| O | 0.31160400  | 5.76236100  | -1.28898900 |
| N | -0.06402300 | 3.77884500  | -2.32776300 |
| H | 0.22588100  | 3.27288300  | -1.50009800 |
| H | -0.18513100 | 3.23884100  | -3.17759700 |
| C | 3.32059500  | -1.43451200 | 2.49763100  |
| O | 2.20245300  | -1.56272300 | 3.11314900  |
| O | 3.35661700  | -0.62403300 | 1.51650200  |
| C | -1.04884100 | -0.13975700 | -6.60407900 |
| C | -1.42287500 | -1.13200200 | -7.50578300 |
| C | -1.64364000 | -2.43984800 | -7.06121600 |
| C | -1.49125000 | -2.76364900 | -5.70914300 |
| C | -1.11215500 | -1.78653900 | -4.79295300 |
| C | -0.89341600 | -0.48702800 | -5.25886100 |
| N | -0.50447800 | 0.55147200  | -4.31188100 |
| O | -0.17999800 | 0.22588500  | -3.16166000 |
| O | -0.52326200 | 1.72477100  | -4.69405200 |
| H | -0.87356800 | 0.87869200  | -6.92769000 |
| H | -1.54076500 | -0.88347000 | -8.55578800 |
| H | -1.93713400 | -3.20836000 | -7.77012300 |
| H | -1.66624400 | -3.77756600 | -5.36365500 |

|    |             |             |             |
|----|-------------|-------------|-------------|
| H  | -1.00571500 | -2.02925300 | -3.74345400 |
| O  | 0.49946900  | 0.25993900  | 0.28421600  |
| O  | 0.75861200  | -1.59442900 | 0.47682200  |
| H  | 1.12604400  | -1.65292900 | -0.50191400 |
| H  | 5.44050600  | -1.73642200 | 2.62356000  |
| H  | 4.49486400  | -2.48731700 | 3.95429200  |
| H  | 4.48113300  | -3.20050500 | 2.32882100  |
| Fe | 1.23737000  | -0.32349600 | 1.77791800  |
| C  | 4.51604700  | -2.25594800 | 2.88653900  |
| H  | -2.73530900 | -7.50757500 | 0.19654000  |
| H  | -1.51784800 | -6.66700800 | 1.16016500  |
| H  | -3.07255300 | -5.88143200 | 0.79470900  |
| C  | 0.84391200  | 4.75725400  | 4.27997400  |
| H  | 1.48970700  | 5.00281600  | 5.13184000  |
| H  | 0.80706900  | 5.63527000  | 3.62406900  |
| H  | -0.16476400 | 4.57401500  | 4.65924600  |
| C  | -0.52137000 | 7.32214800  | -3.52064300 |
| H  | -3.46928200 | -0.80034400 | 6.00983400  |
| H  | -3.58768700 | -2.41123000 | 5.28372200  |
| H  | -2.20638800 | -2.00500900 | 6.31645500  |
| C  | -2.28518200 | -6.52820500 | 0.38930400  |
| H  | -0.64581100 | 7.77627300  | -4.50996000 |
| H  | -1.43673700 | 7.50251400  | -2.94616900 |
| H  | 0.29843300  | 7.83244700  | -3.00649200 |
| C  | -2.88737400 | -1.61223800 | 5.55664200  |
| O  | 1.29005000  | -2.03277200 | -1.93849000 |
| H  | 0.66829300  | -2.81022700 | -1.98321400 |
| H  | 0.85660300  | -1.31779500 | -2.44449200 |

### **B97D**

FeIII-RC-modell<sup>1</sup>-B97D:

|   |             |             |            |
|---|-------------|-------------|------------|
| C | -2.13987100 | -1.27209500 | 4.30834900 |
| N | -2.75414000 | -1.16778000 | 3.06182400 |
| H | -3.74557000 | -1.30961700 | 2.88211100 |
| C | -1.82730500 | -0.86837300 | 2.12836300 |
| H | -2.02846400 | -0.74538600 | 1.07088200 |
| N | -0.62528200 | -0.76635500 | 2.71285200 |
| C | -0.80820200 | -1.01744700 | 4.06557500 |
| H | 0.02396700  | -1.00771600 | 4.76026100 |
| C | 1.28856400  | 3.53543800  | 3.54254800 |
| N | 2.55641300  | 3.41952300  | 2.97948200 |
| H | 3.27951100  | 4.13456100  | 3.01036700 |
| C | 2.68229900  | 2.21112200  | 2.39481200 |
| H | 3.56734300  | 1.85077000  | 1.88520000 |
| N | 1.54222200  | 1.52369800  | 2.55010300 |
| C | 0.66786000  | 2.33790300  | 3.26140700 |
| H | -0.32975500 | 2.00525100  | 3.52460200 |
| C | 3.25746600  | -1.55121800 | 2.45928600 |

|    |             |             |             |
|----|-------------|-------------|-------------|
| O  | 2.14090500  | -1.76511600 | 3.04931800  |
| O  | 3.26817400  | -0.71754200 | 1.47731500  |
| O  | 0.68300400  | -0.47340200 | -0.03016500 |
| O  | 1.02102400  | -1.88884700 | -0.06456400 |
| H  | 1.95483100  | -1.85092700 | -0.38159800 |
| H  | 5.31048300  | -1.51510400 | 3.06656100  |
| H  | 4.34376300  | -2.85479600 | 3.78997400  |
| H  | 4.85551000  | -2.91121800 | 2.06763000  |
| Fe | 1.17868200  | -0.35096100 | 1.78426300  |
| C  | 4.51604600  | -2.25594800 | 2.88653900  |
| C  | 0.84391200  | 4.75725200  | 4.27997300  |
| H  | 1.50114500  | 4.96154300  | 5.14173000  |
| H  | 0.85676900  | 5.64606100  | 3.62740000  |
| H  | -0.18059600 | 4.61441800  | 4.65071700  |
| H  | -3.67173800 | -0.86766800 | 5.77305100  |
| H  | -3.37454900 | -2.59806900 | 5.47224200  |
| H  | -2.19067900 | -1.64120900 | 6.40597700  |
| C  | -2.88737300 | -1.61223800 | 5.55664100  |

OO-cleavage-TS-model1'-B97D:

|    |             |             |             |
|----|-------------|-------------|-------------|
| C  | -2.13393400 | -1.04928200 | 4.39731400  |
| N  | -2.74795500 | -0.58132100 | 3.23639500  |
| H  | -3.75205400 | -0.48728800 | 3.10029100  |
| C  | -1.80536400 | -0.28473100 | 2.32013600  |
| H  | -2.00062400 | 0.08963500  | 1.32269100  |
| N  | -0.59172300 | -0.53662600 | 2.83455700  |
| C  | -0.78375100 | -1.01406500 | 4.12061100  |
| H  | 0.05248700  | -1.30028900 | 4.74769600  |
| C  | 1.54911300  | 3.49753100  | 3.85737900  |
| N  | 2.73918400  | 3.44452000  | 3.13499800  |
| H  | 3.44874700  | 4.17357300  | 3.11756500  |
| C  | 2.80230000  | 2.28128800  | 2.45689700  |
| H  | 3.62098600  | 1.97334800  | 1.81915500  |
| N  | 1.69922300  | 1.56102600  | 2.70817600  |
| C  | 0.91303800  | 2.30831100  | 3.57488200  |
| H  | -0.03903200 | 1.93990100  | 3.93840400  |
| C  | 3.31712300  | -1.35488300 | 2.57700100  |
| O  | 2.17676100  | -1.50850100 | 3.16285200  |
| O  | 3.35686400  | -0.60944500 | 1.53830500  |
| O  | 0.59847300  | 0.27843300  | 0.25238100  |
| O  | 0.87534600  | -1.51725200 | 0.32558800  |
| H  | 1.66854800  | -1.48993700 | -0.25941200 |
| H  | 5.24369200  | -1.24322100 | 3.48433800  |
| H  | 4.31150300  | -2.71561300 | 3.92356800  |
| H  | 5.06892600  | -2.55183800 | 2.29443500  |
| Fe | 1.21089900  | -0.25486100 | 1.85045400  |
| C  | 4.55606400  | -2.01986300 | 3.11059800  |
| C  | 1.17251700  | 4.66605000  | 4.70873600  |

|   |             |             |            |
|---|-------------|-------------|------------|
| H | 1.90751500  | 4.82998500  | 5.51433600 |
| H | 1.11616100  | 5.59112800  | 4.11080700 |
| H | 0.18965500  | 4.48932000  | 5.16732300 |
| H | -3.51697600 | -0.64709600 | 6.00047300 |
| H | -3.57678600 | -2.31444400 | 5.37340900 |
| H | -2.20213900 | -1.79408800 | 6.38881300 |
| C | -2.90232500 | -1.47314800 | 5.60534100 |

OO-cleavage-PC-modell1'-B97D:

|    |             |             |             |
|----|-------------|-------------|-------------|
| C  | -2.13317500 | -1.13331700 | 4.36055800  |
| N  | -2.76082700 | -0.63908400 | 3.22732900  |
| H  | -3.76729600 | -0.56007300 | 3.10034700  |
| C  | -1.82140800 | -0.29124600 | 2.31523500  |
| H  | -2.03583100 | 0.12467500  | 1.33781400  |
| N  | -0.60113200 | -0.53327600 | 2.80754800  |
| C  | -0.77406000 | -1.05792700 | 4.06810900  |
| H  | 0.07022600  | -1.35836300 | 4.67893500  |
| C  | 1.30648800  | 3.55392900  | 3.53089800  |
| N  | 2.35249700  | 3.58831900  | 2.61857700  |
| H  | 2.89519600  | 4.41477000  | 2.37410400  |
| C  | 2.53756500  | 2.35441400  | 2.10984400  |
| H  | 3.27416000  | 2.09076900  | 1.36188400  |
| N  | 1.65735800  | 1.49302900  | 2.67241100  |
| C  | 0.89094400  | 2.21666300  | 3.53787900  |
| H  | 0.10033700  | 1.76304500  | 4.12452800  |
| C  | 3.39028900  | -1.33605400 | 2.46349900  |
| O  | 2.23496900  | -1.43522300 | 3.04435200  |
| O  | 3.52358500  | -0.51487500 | 1.50395500  |
| O  | 0.70679500  | 0.71314700  | 0.44828200  |
| O  | 1.02468000  | -1.77385200 | 0.58748600  |
| H  | 1.10539700  | -1.51678600 | -0.35638200 |
| H  | 5.48694900  | -1.83672300 | 2.58980600  |
| H  | 4.48696200  | -2.43716500 | 3.97074800  |
| H  | 4.37465400  | -3.22265400 | 2.37433900  |
| Fe | 1.24139400  | -0.32653000 | 1.67691700  |
| C  | 4.51604600  | -2.25595100 | 2.88653900  |
| C  | 0.84391000  | 4.75725400  | 4.27997300  |
| H  | 1.63699200  | 5.13484100  | 4.94836200  |
| H  | 0.58640500  | 5.57033500  | 3.58002800  |
| H  | -0.03959600 | 4.50846100  | 4.88240400  |
| H  | -3.50934200 | -0.80702100 | 5.98328800  |
| H  | -3.55745600 | -2.44801600 | 5.29266800  |
| H  | -2.18452300 | -1.95867800 | 6.32659000  |
| C  | -2.88737100 | -1.61223700 | 5.55664000  |

NBZ-FeIII-RC-modell1-B97D:

|   |             |             |            |
|---|-------------|-------------|------------|
| C | -2.12497900 | -1.22797900 | 4.33001500 |
| N | -2.74514400 | -0.93501500 | 3.11781000 |



|    |             |             |             |
|----|-------------|-------------|-------------|
| H  | -3.74857900 | -0.95624500 | 2.95137100  |
| C  | -1.80626300 | -0.63947400 | 2.19421600  |
| H  | -2.00822700 | -0.38926300 | 1.15976800  |
| N  | -0.59124500 | -0.72240300 | 2.75228900  |
| C  | -0.77707600 | -1.08913800 | 4.07778500  |
| H  | 0.06301400  | -1.23728900 | 4.74621700  |
| C  | 1.23082500  | 3.59864100  | 3.41781800  |
| N  | 2.20275400  | 3.69218600  | 2.42540900  |
| H  | 2.73361400  | 4.53130100  | 2.20322400  |
| C  | 2.33388100  | 2.50243200  | 1.80450100  |
| H  | 3.01432400  | 2.30408900  | 0.98312100  |
| N  | 1.47966200  | 1.62384300  | 2.35097400  |
| C  | 0.78986000  | 2.29546900  | 3.35530900  |
| H  | 0.03631600  | 1.79754900  | 3.95519900  |
| C  | 3.24849000  | -1.54615600 | 2.49526500  |
| O  | 2.16122200  | -1.68912200 | 3.15228500  |
| O  | 3.22684800  | -0.77620700 | 1.46143300  |
| C  | 3.76131200  | -1.42994000 | -1.62596900 |
| C  | 3.52434100  | -2.71499100 | -2.13743600 |
| C  | 2.50941600  | -2.92296100 | -3.09072900 |
| C  | 1.72121700  | -1.84591900 | -3.53390400 |
| C  | 1.93257400  | -0.55937600 | -3.02259000 |
| C  | 2.95197000  | -0.37209700 | -2.07580100 |
| N  | 3.15356300  | 0.97270500  | -1.49974000 |
| O  | 2.31368600  | 1.84840600  | -1.74776100 |
| O  | 4.15312400  | 1.15613200  | -0.78662500 |
| H  | 4.52796400  | -1.24740900 | -0.87782500 |
| H  | 4.13391400  | -3.55097400 | -1.79214300 |
| H  | 2.33268900  | -3.92484500 | -3.48461000 |
| H  | 0.93478900  | -2.00791600 | -4.27170400 |
| H  | 1.32010700  | 0.28304100  | -3.33669100 |
| O  | 0.60324300  | -0.55385200 | -0.00103000 |
| O  | 0.84834900  | -1.98667100 | 0.05662000  |
| H  | 1.72395900  | -2.04194500 | -0.39689300 |
| H  | 5.32779500  | -1.52072700 | 3.00103400  |
| H  | 4.38169200  | -2.81989900 | 3.81841200  |
| H  | 4.80473400  | -2.94304200 | 2.07434300  |
| Fe | 1.19968400  | -0.33170800 | 1.77375000  |
| C  | 4.51604600  | -2.25594900 | 2.88653900  |
| C  | 0.84391100  | 4.75725300  | 4.27997300  |
| H  | 1.70986300  | 5.14638400  | 4.84087400  |
| H  | 0.43404300  | 5.58365900  | 3.67561900  |
| H  | 0.07701100  | 4.44164500  | 5.00078400  |
| H  | -3.59593800 | -0.82126300 | 5.85434000  |
| H  | -3.46486700 | -2.53762900 | 5.39353300  |
| H  | -2.18833900 | -1.78305100 | 6.38719200  |
| C  | -2.88737300 | -1.61223800 | 5.55664100  |

NBZ-OO-cleavage-TS-model1-B97D:

|    |             |             |             |
|----|-------------|-------------|-------------|
| C  | -2.12899200 | -1.18839000 | 4.34087500  |
| N  | -2.75760600 | -0.88403100 | 3.13509000  |
| H  | -3.76069300 | -0.92389500 | 2.96966200  |
| C  | -1.82698300 | -0.54944200 | 2.21772000  |
| H  | -2.03569500 | -0.27353300 | 1.19147500  |
| N  | -0.60940100 | -0.61686500 | 2.77351800  |
| C  | -0.78392000 | -1.01460100 | 4.08960900  |
| H  | 0.06077000  | -1.15560100 | 4.75423200  |
| C  | 1.30615800  | 3.53660300  | 3.54839900  |
| N  | 2.56298700  | 3.44962400  | 2.95408800  |
| H  | 3.26547100  | 4.18540100  | 2.95474000  |
| C  | 2.70704400  | 2.23771200  | 2.38039200  |
| H  | 3.58538900  | 1.90306600  | 1.84350800  |
| N  | 1.59467500  | 1.51662600  | 2.57755900  |
| C  | 0.71600700  | 2.31620900  | 3.29814900  |
| H  | -0.26346000 | 1.95844200  | 3.59255600  |
| C  | 3.31808500  | -1.45213900 | 2.45230000  |
| O  | 2.17349800  | -1.63976800 | 3.02047400  |
| O  | 3.38538100  | -0.59473900 | 1.50949000  |
| C  | 6.23435100  | -0.77681300 | -1.84179300 |
| C  | 7.61735700  | -0.99115700 | -1.84807000 |
| C  | 8.15321000  | -2.17250300 | -1.30357100 |
| C  | 7.30544400  | -3.14979700 | -0.75090500 |
| C  | 5.91926300  | -2.95569900 | -0.73842600 |
| C  | 5.40529300  | -1.76592800 | -1.28445700 |
| N  | 3.95617700  | -1.53742200 | -1.26624200 |
| O  | 3.23016200  | -2.45459700 | -0.81732900 |
| O  | 3.50797200  | -0.46715800 | -1.68085200 |
| H  | 5.79923800  | 0.12938300  | -2.25839700 |
| H  | 8.27612000  | -0.23641200 | -2.27885500 |
| H  | 9.23232200  | -2.33304100 | -1.31143800 |
| H  | 7.72328000  | -4.06498100 | -0.33010400 |
| H  | 5.24874700  | -3.70140300 | -0.31765000 |
| O  | 0.58306900  | 0.16441600  | 0.14884000  |
| O  | 0.85678700  | -1.63483000 | 0.30324700  |
| H  | 1.67530400  | -1.70797800 | -0.27324300 |
| H  | 5.42374400  | -1.91246300 | 2.37407000  |
| H  | 4.64109000  | -2.17716100 | 3.97759900  |
| H  | 4.33513600  | -3.31707000 | 2.65033000  |
| Fe | 1.19386900  | -0.34471000 | 1.74750800  |
| C  | 4.51604600  | -2.25594700 | 2.88653900  |
| C  | 0.84391200  | 4.75725100  | 4.27997300  |
| H  | 1.50869400  | 4.98725300  | 5.12951500  |
| H  | 0.82645300  | 5.63810400  | 3.61672700  |
| H  | -0.17147200 | 4.59509200  | 4.66764300  |
| H  | -3.61012100 | -0.83931000 | 5.86770900  |
| H  | -3.44890500 | -2.54326400 | 5.37100800  |
| H  | -2.18873300 | -1.78900000 | 6.38620900  |

C -2.88737300 -1.61223800 5.55664100

NBZ-OO-cleavage-PC-model1-B97D:

C -2.11660400 -1.11015300 4.37660500  
N -2.73685600 -0.53860500 3.26961300  
H -3.74026600 -0.41417400 3.15819200  
C -1.79796200 -0.19027800 2.36139100  
H -2.00210600 0.28080200 1.40755300  
N -0.58635800 -0.50804600 2.82903300  
C -0.76816300 -1.08068800 4.07655000  
H 0.07163900 -1.44087200 4.65997400  
C 1.30511700 3.54857500 3.52774100  
N 2.36119000 3.58951700 2.62074900  
H 2.91170200 4.41567500 2.39649200  
C 2.54621700 2.36403000 2.09332300  
H 3.28983900 2.10781700 1.34994900  
N 1.65674100 1.50733900 2.63137100  
C 0.88010500 2.22791900 3.51255200  
H 0.08065100 1.76343900 4.07734100  
C 3.39089000 -1.33251800 2.46888200  
O 2.24777200 -1.41083100 3.07713400  
O 3.50748700 -0.52902200 1.49432700  
C 6.18913900 -0.76369900 -1.89184100  
C 7.57919000 -0.91986400 -1.93914200  
C 8.18307800 -2.05902700 -1.37638400  
C 7.39675900 -3.05186400 -0.76400900  
C 6.00457300 -2.91599300 -0.71065400  
C 5.42180900 -1.76758500 -1.27562000  
N 3.96498000 -1.60107800 -1.21797300  
O 3.29445800 -2.53677300 -0.72392700  
O 3.45807800 -0.56287600 -1.64665400  
H 5.70283200 0.10962900 -2.32160000  
H 8.19017200 -0.15274000 -2.41612400  
H 9.26733300 -2.17401800 -1.41598400  
H 7.86681100 -3.93427900 -0.32850700  
H 5.38173400 -3.67486200 -0.24281100  
O 0.63419200 0.67746300 0.45450000  
O 1.00621400 -1.70957300 0.57837500  
H 1.76887600 -1.84470800 -0.05708900  
H 5.46679700 -1.92242900 2.45071900  
H 4.58931900 -2.30189800 3.98335100  
H 4.28161500 -3.26917300 2.52129200  
Fe 1.22138100 -0.31122500 1.72138100  
C 4.51604700 -2.25594900 2.88653900  
C 0.84391200 4.75725300 4.27997300  
H 1.63662800 5.13747400 4.94632800  
H 0.57284000 5.56836700 3.58354900  
H -0.03516600 4.50492100 4.88828400  
H -3.47460600 -0.80434200 6.02479400

|   |             |             |            |
|---|-------------|-------------|------------|
| H | -3.58784100 | -2.41230400 | 5.26381300 |
| H | -2.19368500 | -2.01719500 | 6.30669600 |
| C | -2.88737300 | -1.61223800 | 5.55664100 |

### **B3LYP-D2**

FeIII-RC-modell'-B3LYP-D2:

|    |             |             |             |
|----|-------------|-------------|-------------|
| C  | -2.11959800 | -1.24179700 | 4.33469300  |
| N  | -2.72092500 | -1.04318300 | 3.10006000  |
| H  | -3.71317900 | -1.13230800 | 2.90981600  |
| C  | -1.78065700 | -0.73523800 | 2.19162300  |
| H  | -1.96587500 | -0.54228700 | 1.14616000  |
| N  | -0.58636800 | -0.71969400 | 2.77990600  |
| C  | -0.78470700 | -1.03625900 | 4.11380200  |
| H  | 0.04132200  | -1.10498900 | 4.80558400  |
| C  | 1.30008700  | 3.53118900  | 3.56445600  |
| N  | 2.56083100  | 3.42089500  | 2.99521500  |
| H  | 3.27506100  | 4.14103400  | 3.00836900  |
| C  | 2.69302900  | 2.21042400  | 2.43182100  |
| H  | 3.57308900  | 1.84961700  | 1.92198700  |
| N  | 1.56845300  | 1.51690700  | 2.60638300  |
| C  | 0.69307500  | 2.33104900  | 3.31097200  |
| H  | -0.29300300 | 1.99208900  | 3.58985400  |
| C  | 3.25659000  | -1.55197100 | 2.48664500  |
| O  | 2.15123100  | -1.76521200 | 3.08262200  |
| O  | 3.25108700  | -0.69914000 | 1.52848800  |
| O  | 0.63267000  | -0.35916300 | 0.07921400  |
| O  | 0.91843600  | -1.78382800 | 0.10696700  |
| H  | 1.80489800  | -1.81839300 | -0.31358000 |
| H  | 5.23435700  | -1.51644300 | 3.26311600  |
| H  | 4.31573700  | -3.00324600 | 3.65787200  |
| H  | 4.96405500  | -2.73044300 | 2.00539500  |
| Fe | 1.20870600  | -0.34854800 | 1.86398400  |
| C  | 4.51604600  | -2.25595000 | 2.88653900  |
| C  | 0.84390300  | 4.75724000  | 4.27997600  |
| H  | 1.49820900  | 4.98408700  | 5.13190800  |
| H  | 0.84282900  | 5.62972700  | 3.61387200  |
| H  | -0.17310800 | 4.60892900  | 4.65549800  |
| H  | -3.63423100 | -0.84754300 | 5.80737200  |
| H  | -3.41503700 | -2.56523100 | 5.41990500  |
| H  | -2.20231300 | -1.71679600 | 6.40354900  |
| C  | -2.88736400 | -1.61222400 | 5.55663800  |

OO-cleavage-TS-modell'-B3LYP-D2:

|   |             |             |            |
|---|-------------|-------------|------------|
| C | -2.09616800 | -1.11106300 | 4.36941500 |
| N | -2.70944200 | -0.64705500 | 3.21353500 |
| H | -3.71028100 | -0.54929400 | 3.08039100 |
| C | -1.77264400 | -0.35487100 | 2.29779900 |

|    |             |             |             |
|----|-------------|-------------|-------------|
| H  | -1.96858600 | 0.02342000  | 1.30636300  |
| N  | -0.56675000 | -0.60690500 | 2.80437200  |
| C  | -0.75483300 | -1.08089500 | 4.09263400  |
| H  | 0.08175000  | -1.36751200 | 4.71149700  |
| C  | 1.51243000  | 3.33522900  | 3.93046000  |
| N  | 2.70201500  | 3.31244300  | 3.21766500  |
| H  | 3.40742000  | 4.04118100  | 3.22798800  |
| C  | 2.77719400  | 2.17349600  | 2.51104900  |
| H  | 3.59853300  | 1.88795600  | 1.87325100  |
| N  | 1.68432500  | 1.44522700  | 2.73131900  |
| C  | 0.88760800  | 2.15940200  | 3.61260600  |
| H  | -0.05877300 | 1.77362100  | 3.95837900  |
| C  | 3.32461200  | -1.35873800 | 2.56547100  |
| O  | 2.18411200  | -1.53320100 | 3.13246200  |
| O  | 3.35686700  | -0.60944400 | 1.53830800  |
| O  | 0.61387900  | 0.33538300  | 0.29948200  |
| O  | 0.87534300  | -1.51725300 | 0.32558400  |
| H  | 1.62730000  | -1.47405300 | -0.30371900 |
| H  | 5.38316300  | -1.92849600 | 2.41266500  |
| H  | 4.82586400  | -1.49415900 | 4.05581500  |
| H  | 4.34614300  | -3.05171600 | 3.36164900  |
| Fe | 1.22412000  | -0.32803200 | 1.82176900  |
| C  | 4.55447400  | -2.00351400 | 3.12132700  |
| C  | 1.12381900  | 4.47095100  | 4.81391200  |
| H  | 1.85345000  | 4.61729100  | 5.62088700  |
| H  | 1.05655600  | 5.40845700  | 4.24645100  |
| H  | 0.14716800  | 4.27064700  | 5.26508000  |
| H  | -3.53688400 | -0.72264200 | 5.91240900  |
| H  | -3.50460000 | -2.40358900 | 5.34548800  |
| H  | -2.20213900 | -1.79408800 | 6.38881400  |
| C  | -2.87750700 | -1.53034900 | 5.56897000  |

OO-cleavage-PC-modell'-B3LYP-D2:

|   |             |             |            |
|---|-------------|-------------|------------|
| C | -3.68117900 | -2.43271900 | 4.31709100 |
| N | -4.33345900 | -1.66446000 | 3.36373500 |
| H | -5.32022500 | -1.43025900 | 3.37468100 |
| C | -3.45388300 | -1.28878700 | 2.41869300 |
| H | -3.69137600 | -0.69044600 | 1.55270300 |
| N | -2.25204100 | -1.77618300 | 2.71629300 |
| C | -2.37984300 | -2.49060500 | 3.89440400 |
| H | -1.53718200 | -2.99669200 | 4.33915500 |
| C | 0.37458500  | 1.85293600  | 3.55733600 |
| N | 1.59536600  | 1.53101800  | 2.98249300 |
| H | 2.44204400  | 2.08471900  | 3.05937400 |
| C | 1.48922400  | 0.37244400  | 2.31438100 |
| H | 2.28055600  | -0.11103300 | 1.76503600 |
| N | 0.24498000  | -0.08797000 | 2.44260100 |
| C | -0.46270600 | 0.82804300  | 3.20646000 |
| H | -1.50327500 | 0.67615100  | 3.44604600 |

|    |             |             |             |
|----|-------------|-------------|-------------|
| C  | 1.42717000  | -3.06211000 | 2.01242200  |
| O  | 1.56151400  | -2.30292200 | 1.01454000  |
| O  | 0.32829700  | -2.97443600 | 2.68868500  |
| O  | -1.17030800 | -0.57625800 | 0.36687100  |
| O  | -1.07971100 | -2.85603800 | 0.21913300  |
| H  | -0.49837000 | -2.79907300 | -0.56956800 |
| C  | 2.45764500  | -4.07080100 | 2.42019100  |
| H  | 2.04569200  | -5.07664600 | 2.26907800  |
| H  | 3.36596700  | -3.95041500 | 1.82490900  |
| H  | 2.68289300  | -3.96148800 | 3.48750500  |
| C  | 0.16611700  | 3.09932200  | 4.35118000  |
| H  | 0.35298400  | 3.99035200  | 3.73776300  |
| H  | -0.86541700 | 3.13902800  | 4.71372100  |
| H  | 0.84039700  | 3.13692600  | 5.21641600  |
| C  | -4.38016500 | -3.02223500 | 5.49444700  |
| H  | -3.66388200 | -3.57859400 | 6.10663500  |
| H  | -4.83843800 | -2.24434100 | 6.11920100  |
| H  | -5.17409900 | -3.71214700 | 5.17972500  |
| Fe | -0.55759900 | -1.67840000 | 1.51332900  |

NBZ-FeIII-RC-modell1-B3LYP-D2:

|   |             |             |             |
|---|-------------|-------------|-------------|
| C | -2.11540000 | -1.24148800 | 4.33669800  |
| N | -2.71392000 | -1.04589700 | 3.10025800  |
| H | -3.70570700 | -1.13529000 | 2.90807900  |
| C | -1.77136200 | -0.73969400 | 2.19326900  |
| H | -1.95391700 | -0.54963300 | 1.14685000  |
| N | -0.57835900 | -0.72243000 | 2.78369400  |
| C | -0.77983700 | -1.03541500 | 4.11795800  |
| H | 0.04502700  | -1.10214300 | 4.81136400  |
| C | 1.28954300  | 3.54030900  | 3.54314800  |
| N | 2.51405100  | 3.46683700  | 2.89441300  |
| H | 3.19972500  | 4.21281800  | 2.84845000  |
| C | 2.65323000  | 2.25672100  | 2.33294700  |
| H | 3.50283600  | 1.93990200  | 1.74723800  |
| N | 1.56483300  | 1.52767100  | 2.58274500  |
| C | 0.70829300  | 2.31907200  | 3.33581500  |
| H | -0.24467700 | 1.94791800  | 3.68129300  |
| C | 3.25715300  | -1.53675000 | 2.51441300  |
| O | 2.14827600  | -1.77139200 | 3.09351300  |
| O | 3.25387300  | -0.66774900 | 1.57171800  |
| C | 4.12786600  | -1.20095200 | -1.29958700 |
| C | 3.82053300  | -2.38461900 | -1.97237500 |
| C | 2.77344500  | -2.41410400 | -2.90335600 |
| C | 2.02660000  | -1.25977100 | -3.16626700 |
| C | 2.30892300  | -0.07354700 | -2.49049700 |
| C | 3.35850200  | -0.06553700 | -1.56974600 |
| N | 3.62624900  | 1.15922800  | -0.81556600 |
| O | 2.77142500  | 2.04871700  | -0.82734800 |
| O | 4.68728500  | 1.24066100  | -0.19180400 |

|    |             |             |             |
|----|-------------|-------------|-------------|
| H  | 4.91724600  | -1.15300800 | -0.56131700 |
| H  | 4.39453100  | -3.28289000 | -1.76687300 |
| H  | 2.53928100  | -3.33904500 | -3.42216200 |
| H  | 1.21567700  | -1.28565600 | -3.88734300 |
| H  | 1.72908900  | 0.82528700  | -2.65688500 |
| O  | 0.62267900  | -0.38217000 | 0.08491200  |
| O  | 0.97025200  | -1.79165100 | 0.08452800  |
| H  | 1.83185300  | -1.78404900 | -0.38558200 |
| H  | 5.34264000  | -1.54093700 | 2.95949500  |
| H  | 4.39162600  | -2.79872200 | 3.82679600  |
| H  | 4.76068000  | -2.96777800 | 2.08677300  |
| Fe | 1.21485500  | -0.34508000 | 1.85991400  |
| C  | 4.51604400  | -2.25594300 | 2.88654000  |
| C  | 0.84391500  | 4.75724800  | 4.27997200  |
| H  | 0.78936300  | 5.62798800  | 3.61384700  |
| H  | -0.14878900 | 4.58831600  | 4.70847000  |
| H  | 1.53621800  | 5.00032000  | 5.09676500  |
| H  | -3.63722000 | -0.84915200 | 5.80326200  |
| H  | -3.41191400 | -2.56684800 | 5.41898100  |
| H  | -2.20557300 | -1.71384700 | 6.40655000  |
| C  | -2.88737400 | -1.61223800 | 5.55664100  |

NBZ-OO-cleavage-TS-model1-B3LYP-D2:

|   |             |             |             |
|---|-------------|-------------|-------------|
| C | -2.10650900 | -1.18990700 | 4.35734300  |
| N | -2.71199800 | -0.89015300 | 3.14555800  |
| H | -3.70821800 | -0.93321700 | 2.96084300  |
| C | -1.76937900 | -0.55359400 | 2.24887000  |
| H | -1.95703400 | -0.28196400 | 1.22149300  |
| N | -0.57043900 | -0.61425400 | 2.82267300  |
| C | -0.76575800 | -1.01331000 | 4.13396300  |
| H | 0.06513200  | -1.15130500 | 4.80935000  |
| C | 1.32980700  | 3.50355900  | 3.63284500  |
| N | 2.63611700  | 3.35060800  | 3.19281600  |
| H | 3.36715100  | 4.04907600  | 3.27109500  |
| C | 2.78476600  | 2.13136200  | 2.65027500  |
| H | 3.69602900  | 1.74697400  | 2.22097700  |
| N | 1.63063100  | 1.47163800  | 2.72063500  |
| C | 0.71525200  | 2.31818200  | 3.32745900  |
| H | -0.30494100 | 2.01285300  | 3.50098500  |
| C | 3.31052300  | -1.45010500 | 2.50482700  |
| O | 2.18410700  | -1.63497600 | 3.08583900  |
| O | 3.35455800  | -0.57553700 | 1.58033700  |
| C | 6.13888900  | -0.16776200 | -1.47579600 |
| C | 7.52208300  | -0.30174600 | -1.37879000 |
| C | 8.08025100  | -1.47696900 | -0.86186300 |
| C | 7.25756400  | -2.52933500 | -0.44275100 |
| C | 5.87202300  | -2.41640600 | -0.53798900 |
| C | 5.33685000  | -1.23151400 | -1.05280000 |
| N | 3.89121300  | -1.08813700 | -1.13750200 |

|    |             |             |             |
|----|-------------|-------------|-------------|
| O  | 3.19394700  | -2.08912500 | -0.88134700 |
| O  | 3.41154900  | -0.00388700 | -1.44452300 |
| H  | 5.68338600  | 0.73164900  | -1.87208100 |
| H  | 8.16357200  | 0.51008400  | -1.70722100 |
| H  | 9.15943400  | -1.57368500 | -0.78655000 |
| H  | 7.69454000  | -3.43848400 | -0.04165000 |
| H  | 5.21721200  | -3.21692800 | -0.21803500 |
| O  | 0.60127200  | 0.32822700  | 0.31071400  |
| O  | 0.86524500  | -1.52837100 | 0.37811300  |
| H  | 1.64938000  | -1.56189100 | -0.24176200 |
| H  | 5.39223300  | -1.93555400 | 2.31839300  |
| H  | 4.69891700  | -2.15169800 | 3.96277400  |
| H  | 4.31001800  | -3.31506700 | 2.68846800  |
| Fe | 1.22524600  | -0.32865900 | 1.81890500  |
| C  | 4.51592200  | -2.25579800 | 2.88658500  |
| C  | 0.84400300  | 4.75713100  | 4.27993900  |
| H  | 1.39031400  | 4.96351400  | 5.20967400  |
| H  | 0.97322900  | 5.62061900  | 3.61461600  |
| H  | -0.21967000 | 4.66201400  | 4.51876600  |
| H  | -3.60464700 | -0.83776300 | 5.85826800  |
| H  | -3.44965300 | -2.53416600 | 5.35842300  |
| H  | -2.20730600 | -1.79769300 | 6.39374400  |
| C  | -2.88734000 | -1.61226700 | 5.55662900  |

NBZ-OO-cleavage-PC-model1-B3LYP-D2:

|   |             |             |             |
|---|-------------|-------------|-------------|
| C | -2.09411600 | -1.12249500 | 4.39012000  |
| N | -2.69716700 | -0.58888100 | 3.26155100  |
| H | -3.69665700 | -0.48836300 | 3.12361700  |
| C | -1.74777200 | -0.23799900 | 2.37505100  |
| H | -1.93655200 | 0.20191300  | 1.40791300  |
| N | -0.54846500 | -0.51391300 | 2.87668900  |
| C | -0.74821100 | -1.06752100 | 4.12830300  |
| H | 0.08211600  | -1.39086000 | 4.73804500  |
| C | 1.35769000  | 3.49669800  | 3.66299500  |
| N | 2.68425200  | 3.32569600  | 3.29459000  |
| H | 3.42138300  | 4.01170000  | 3.41618500  |
| C | 2.84684100  | 2.10899100  | 2.74980900  |
| H | 3.77200500  | 1.71577200  | 2.36080300  |
| N | 1.68079800  | 1.46643100  | 2.75752000  |
| C | 0.74372600  | 2.32235700  | 3.31812000  |
| H | -0.28832800 | 2.03175700  | 3.42900400  |
| C | 3.38008000  | -1.34548100 | 2.50778800  |
| O | 2.25502000  | -1.41354700 | 3.13223400  |
| O | 3.46457000  | -0.53405400 | 1.54144600  |
| C | 6.06208200  | -0.55285900 | -1.70721300 |
| C | 7.44880400  | -0.68408800 | -1.70909400 |
| C | 8.05003600  | -1.80387100 | -1.12209800 |
| C | 7.26692900  | -2.80265800 | -0.53108600 |
| C | 5.87818800  | -2.69207000 | -0.52449600 |



|    |             |             |             |
|----|-------------|-------------|-------------|
| C  | 5.29981900  | -1.56308600 | -1.11331800 |
| N  | 3.85263900  | -1.42381100 | -1.10026600 |
| O  | 3.18169300  | -2.38077900 | -0.66463200 |
| O  | 3.34212500  | -0.38543900 | -1.50217700 |
| H  | 5.57439100  | 0.30464500  | -2.15465000 |
| H  | 8.05936700  | 0.08644900  | -2.16936500 |
| H  | 9.13195100  | -1.89903900 | -1.12574900 |
| H  | 7.73717800  | -3.66910000 | -0.07663400 |
| H  | 5.25397300  | -3.45277200 | -0.07338900 |
| O  | 0.63580500  | 0.65026700  | 0.54150200  |
| O  | 0.95351400  | -1.61010900 | 0.64379400  |
| H  | 1.69535600  | -1.74053600 | -0.01609100 |
| H  | 5.42453100  | -1.97114400 | 2.35080100  |
| H  | 4.68014700  | -2.22645700 | 3.96957500  |
| H  | 4.23828900  | -3.28363300 | 2.61941700  |
| Fe | 1.26027700  | -0.27362600 | 1.82091100  |
| C  | 4.51603900  | -2.25593800 | 2.88654200  |
| C  | 0.84391600  | 4.75724000  | 4.27997100  |
| H  | 1.33935900  | 4.96430800  | 5.23736400  |
| H  | 1.01508100  | 5.61608500  | 3.61821100  |
| H  | -0.23165700 | 4.66746800  | 4.45980100  |
| H  | -3.49215600 | -0.80635700 | 5.99276900  |
| H  | -3.56662200 | -2.42277700 | 5.26162400  |
| H  | -2.21233800 | -1.99355700 | 6.32910000  |
| C  | -2.88736900 | -1.61223600 | 5.55663900  |

### ***B3LYP-D3***

FeIII-RC-modell'-B3LYP-D3:

|   |             |             |            |
|---|-------------|-------------|------------|
| C | -2.12017900 | -1.25056800 | 4.33222900 |
| N | -2.72165600 | -1.04751200 | 3.09678800 |
| H | -3.71442900 | -1.13031700 | 2.90646700 |
| C | -1.78026900 | -0.74476300 | 2.18752300 |
| H | -1.96193700 | -0.54808300 | 1.14268100 |
| N | -0.58580200 | -0.73742300 | 2.77552100 |
| C | -0.78403000 | -1.05391300 | 4.10972200 |
| H | 0.04401500  | -1.12608800 | 4.79781700 |
| C | 1.29783800  | 3.53296300  | 3.56115500 |
| N | 2.56075700  | 3.41649600  | 2.99481800 |
| H | 3.27930600  | 4.13226400  | 3.01085400 |
| C | 2.68827700  | 2.20600900  | 2.43000600 |
| H | 3.56647900  | 1.83822300  | 1.92311000 |
| N | 1.55910300  | 1.51895800  | 2.60044100 |
| C | 0.68522000  | 2.33659200  | 3.30334900 |
| H | -0.30323700 | 2.00192600  | 3.57651400 |
| C | 3.25606600  | -1.55475200 | 2.48768700 |
| O | 2.15048100  | -1.77137300 | 3.08188900 |
| O | 3.24963200  | -0.69962600 | 1.53136200 |
| O | 0.62844200  | -0.35431300 | 0.07820300 |

|    |             |             |             |
|----|-------------|-------------|-------------|
| O  | 0.89900000  | -1.78171600 | 0.09041200  |
| H  | 1.77103700  | -1.82512300 | -0.35864300 |
| H  | 5.23633100  | -1.51611300 | 3.25459800  |
| H  | 4.32034400  | -2.99766000 | 3.66242200  |
| H  | 4.95996500  | -2.73658200 | 2.00825000  |
| Fe | 1.20631800  | -0.34953200 | 1.86245300  |
| C  | 4.51604600  | -2.25595000 | 2.88653900  |
| C  | 0.84390300  | 4.75724000  | 4.27997600  |
| H  | 1.49291400  | 4.97833900  | 5.13598100  |
| H  | 0.84893600  | 5.63332900  | 3.62055000  |
| H  | -0.17448200 | 4.61486700  | 4.65079300  |
| H  | -3.62470200 | -0.84120600 | 5.81105500  |
| H  | -3.42563200 | -2.55863400 | 5.42489300  |
| H  | -2.20386900 | -1.72405500 | 6.40244600  |
| C  | -2.88736400 | -1.61222400 | 5.55663800  |

OO-cleavage-TS-model1'-B3LYP-D3:

|    |             |             |             |
|----|-------------|-------------|-------------|
| C  | -2.10299000 | -1.13713800 | 4.36086600  |
| N  | -2.71757500 | -0.68377700 | 3.19980600  |
| H  | -3.71870700 | -0.59499200 | 3.06258500  |
| C  | -1.78089400 | -0.38668100 | 2.28525100  |
| H  | -1.97500700 | -0.01409900 | 1.29174500  |
| N  | -0.57434100 | -0.62572600 | 2.79703300  |
| C  | -0.76121100 | -1.09647000 | 4.08724600  |
| H  | 0.07697900  | -1.37160400 | 4.70823400  |
| C  | 1.50498900  | 3.38564400  | 3.85765100  |
| N  | 2.69197600  | 3.34675200  | 3.13912100  |
| H  | 3.39719000  | 4.07571100  | 3.12833800  |
| C  | 2.76359700  | 2.19314300  | 2.45596700  |
| H  | 3.58091600  | 1.89341900  | 1.82040500  |
| N  | 1.67193100  | 1.46953200  | 2.69841300  |
| C  | 0.87891000  | 2.20289200  | 3.56832800  |
| H  | -0.06577400 | 1.82630800  | 3.92692100  |
| C  | 3.32009200  | -1.35142000 | 2.57017800  |
| O  | 2.17806000  | -1.51524900 | 3.13828700  |
| O  | 3.35686700  | -0.60944400 | 1.53830800  |
| O  | 0.59890600  | 0.33359500  | 0.29595300  |
| O  | 0.87534300  | -1.51725300 | 0.32558400  |
| H  | 1.62908100  | -1.46554500 | -0.30049000 |
| H  | 5.37477900  | -1.93371400 | 2.42485100  |
| H  | 4.81854400  | -1.48846400 | 4.06225400  |
| H  | 4.33218300  | -3.04450800 | 3.37626400  |
| Fe | 1.21419800  | -0.32080000 | 1.82006800  |
| C  | 4.54501800  | -1.99975100 | 3.13098800  |
| C  | 1.11832400  | 4.53962400  | 4.71745500  |
| H  | 1.84778200  | 4.70484000  | 5.51935100  |
| H  | 1.04844400  | 5.46470800  | 4.13246300  |
| H  | 0.14402800  | 4.35210900  | 5.17646600  |
| H  | -3.55498600 | -0.75945200 | 5.89630100  |

|   |             |             |            |
|---|-------------|-------------|------------|
| H | -3.48691900 | -2.44454600 | 5.35403000 |
| H | -2.20213900 | -1.79408800 | 6.38881400 |
| C | -2.87880200 | -1.55603900 | 5.56356300 |

OO-cleavage-PC-modell'-B3LYP-D3:

|    |             |             |             |
|----|-------------|-------------|-------------|
| C  | -2.10622900 | -1.15877900 | 4.36866300  |
| N  | -2.72050500 | -0.65869400 | 3.22841400  |
| H  | -3.72165900 | -0.56587400 | 3.09518600  |
| C  | -1.78266900 | -0.32372300 | 2.32654000  |
| H  | -1.97856000 | 0.09457600  | 1.35202600  |
| N  | -0.57672900 | -0.58195800 | 2.82797700  |
| C  | -0.76272600 | -1.10588300 | 4.09645800  |
| H  | 0.07531600  | -1.40381000 | 4.70758400  |
| C  | 1.34986800  | 3.50887000  | 3.63418900  |
| N  | 2.66430400  | 3.35247800  | 3.21058900  |
| H  | 3.39974100  | 4.04463700  | 3.30811200  |
| C  | 2.82017600  | 2.14073500  | 2.65667500  |
| H  | 3.73060900  | 1.75247500  | 2.23021000  |
| N  | 1.65938500  | 1.48681200  | 2.71163600  |
| C  | 0.73373300  | 2.33045600  | 3.31017300  |
| H  | -0.28851600 | 2.02862600  | 3.46541000  |
| C  | 3.41738000  | -1.32981700 | 2.44162700  |
| O  | 2.26660600  | -1.37246900 | 3.04137400  |
| O  | 3.54935700  | -0.54901000 | 1.46315600  |
| O  | 0.55378000  | 0.70841600  | 0.54925800  |
| O  | 1.04626000  | -1.51939800 | 0.49656100  |
| H  | 1.68036700  | -1.37520900 | -0.23915600 |
| H  | 5.48591800  | -1.86746900 | 2.56953500  |
| H  | 4.49021900  | -2.39816200 | 3.96997800  |
| H  | 4.35150700  | -3.23076400 | 2.41074100  |
| Fe | 1.22437900  | -0.24917400 | 1.79241300  |
| C  | 4.51603700  | -2.25593700 | 2.88654300  |
| C  | 0.84391600  | 4.75723700  | 4.27997100  |
| H  | 1.36817600  | 4.96148800  | 5.22108600  |
| H  | 0.98226500  | 5.62401900  | 3.62303400  |
| H  | -0.22275600 | 4.65626000  | 4.49585700  |
| H  | -3.49063400 | -0.79564000 | 5.97118100  |
| H  | -3.56621200 | -2.43312400 | 5.29590900  |
| H  | -2.20822300 | -1.96623100 | 6.33670300  |
| C  | -2.88736700 | -1.61223400 | 5.55663900  |

NBZ-FeIII-RC-modell1-B3LYP-D3:

|   |             |             |            |
|---|-------------|-------------|------------|
| C | -2.11653700 | -1.24957200 | 4.33420100 |
| N | -2.71526200 | -1.04742800 | 3.09728600 |
| H | -3.70763800 | -1.12959600 | 2.90498500 |
| C | -1.77144600 | -0.74578500 | 2.18975200 |
| H | -1.95034600 | -0.55065100 | 1.14416100 |
| N | -0.57828300 | -0.73837100 | 2.77990300 |

|    |             |             |             |
|----|-------------|-------------|-------------|
| C  | -0.77964400 | -1.05311100 | 4.11405500  |
| H  | 0.04723100  | -1.12474100 | 4.80361300  |
| C  | 1.29077700  | 3.54108600  | 3.54366500  |
| N  | 2.52169500  | 3.45906700  | 2.90496000  |
| H  | 3.21383900  | 4.19943300  | 2.86556800  |
| C  | 2.65702300  | 2.24870800  | 2.34253700  |
| H  | 3.50750700  | 1.92412500  | 1.76316100  |
| N  | 1.56053000  | 1.52810100  | 2.58195700  |
| C  | 0.70255700  | 2.32446300  | 3.32903000  |
| H  | -0.25540700 | 1.95900000  | 3.66452200  |
| C  | 3.25412100  | -1.54315700 | 2.51659700  |
| O  | 2.15052100  | -1.76800700 | 3.10804400  |
| O  | 3.24344600  | -0.68590900 | 1.56194900  |
| C  | 4.12340900  | -1.18827400 | -1.33714000 |
| C  | 3.81810400  | -2.36056000 | -2.02906300 |
| C  | 2.78236200  | -2.37210700 | -2.97203500 |
| C  | 2.04360800  | -1.21150500 | -3.22683200 |
| C  | 2.32330400  | -0.03680300 | -2.53138800 |
| C  | 3.36277100  | -0.04636800 | -1.60029300 |
| N  | 3.62917000  | 1.16754500  | -0.82801700 |
| O  | 2.77956300  | 2.06223800  | -0.83852300 |
| O  | 4.68337200  | 1.23445800  | -0.19077700 |
| H  | 4.90528900  | -1.15435100 | -0.59034600 |
| H  | 4.38605900  | -3.26398500 | -1.82994100 |
| H  | 2.55034100  | -3.28847700 | -3.50658500 |
| H  | 1.24097700  | -1.22354700 | -3.95735300 |
| H  | 1.74906200  | 0.86661400  | -2.69162000 |
| O  | 0.61945900  | -0.38836500 | 0.08307800  |
| O  | 0.92264300  | -1.80809500 | 0.09768700  |
| H  | 1.77972100  | -1.83581600 | -0.37958300 |
| H  | 5.33692200  | -1.53674400 | 2.96495600  |
| H  | 4.39563500  | -2.80361400 | 3.82275500  |
| H  | 4.76853600  | -2.96020000 | 2.08440900  |
| Fe | 1.21094600  | -0.34374000 | 1.85925200  |
| C  | 4.51604400  | -2.25594300 | 2.88654000  |
| C  | 0.84391500  | 4.75724800  | 4.27997200  |
| H  | 0.79887100  | 5.63083000  | 3.61875800  |
| H  | -0.15262900 | 4.59449900  | 4.69895500  |
| H  | 1.52716900  | 4.99569900  | 5.10417300  |
| H  | -3.62655600 | -0.84221900 | 5.80869200  |
| H  | -3.42383600 | -2.55944400 | 5.42319200  |
| H  | -2.20645100 | -1.72304300 | 6.40467300  |
| C  | -2.88737400 | -1.61223800 | 5.55664100  |

NBZ-OO-cleavage-TS-model1-B3LYP-D3:

|   |             |             |            |
|---|-------------|-------------|------------|
| C | -2.11930600 | -1.16621800 | 4.35890800 |
| N | -2.74214100 | -0.69911400 | 3.20872800 |
| H | -3.74447800 | -0.62160700 | 3.07495400 |
| C | -1.81012600 | -0.37776700 | 2.29639300 |

|    |             |             |             |
|----|-------------|-------------|-------------|
| H  | -2.01033800 | 0.00489500  | 1.30809800  |
| N  | -0.60059900 | -0.61067800 | 2.80097000  |
| C  | -0.77821500 | -1.10467800 | 4.08289300  |
| H  | 0.06594700  | -1.38184200 | 4.69497200  |
| C  | 1.30612900  | 3.53505900  | 3.55891800  |
| N  | 2.56150800  | 3.43635800  | 2.97352300  |
| H  | 3.26968400  | 4.16219400  | 2.97633000  |
| C  | 2.69819600  | 2.22586600  | 2.40748400  |
| H  | 3.56896900  | 1.87565900  | 1.87751900  |
| N  | 1.58534400  | 1.52067000  | 2.60080600  |
| C  | 0.70931300  | 2.32717000  | 3.31283300  |
| H  | -0.27058500 | 1.97972400  | 3.59820600  |
| C  | 3.33700900  | -1.41260300 | 2.49738800  |
| O  | 2.19583800  | -1.58596100 | 3.06075100  |
| O  | 3.41798200  | -0.55020800 | 1.56930400  |
| C  | 6.08490200  | 0.16011100  | -1.39254500 |
| C  | 7.47376400  | 0.07484900  | -1.34936100 |
| C  | 8.09423100  | -1.14050400 | -1.03996800 |
| C  | 7.32836100  | -2.28052300 | -0.77223100 |
| C  | 5.93790900  | -2.21581000 | -0.81428700 |
| C  | 5.34026300  | -0.99086700 | -1.12259600 |
| N  | 3.88791400  | -0.90087000 | -1.15522500 |
| O  | 3.23786500  | -1.94963600 | -0.97709900 |
| O  | 3.35779500  | 0.18650900  | -1.34669700 |
| H  | 5.58268300  | 1.09010600  | -1.62918800 |
| H  | 8.07131300  | 0.95637100  | -1.55933100 |
| H  | 9.17816400  | -1.19950600 | -1.00746200 |
| H  | 7.81402100  | -3.22129300 | -0.53294600 |
| H  | 5.32589000  | -3.08541900 | -0.61084000 |
| O  | 0.52298400  | 0.27827900  | 0.25218400  |
| O  | 0.90500000  | -1.55770000 | 0.34472600  |
| H  | 1.68241800  | -1.54040200 | -0.28555300 |
| H  | 4.51757700  | -2.43861500 | 3.96450900  |
| H  | 4.42247300  | -3.22487600 | 2.38060400  |
| H  | 5.44844200  | -1.78245300 | 2.57286700  |
| Fe | 1.18131900  | -0.31903600 | 1.77019400  |
| C  | 4.51597800  | -2.25589500 | 2.88656400  |
| C  | 0.84393300  | 4.75719400  | 4.27996500  |
| H  | 1.49797000  | 4.98889300  | 5.12935200  |
| H  | 0.83203000  | 5.63097600  | 3.61753300  |
| H  | -0.16918700 | 4.60374400  | 4.66085100  |
| H  | -3.51059500 | -0.80272500 | 5.95533400  |
| H  | -3.54617400 | -2.45501100 | 5.31473500  |
| H  | -2.19868100 | -1.93263400 | 6.34282700  |
| C  | -2.88732600 | -1.61223400 | 5.55662400  |

NBZ-OO-cleavage-PC-model1-B3LYP-D3:

|   |             |             |            |
|---|-------------|-------------|------------|
| C | -2.11038600 | -1.14036000 | 4.37290600 |
| N | -2.72822200 | -0.64207700 | 3.23460900 |

|    |             |             |             |
|----|-------------|-------------|-------------|
| H  | -3.72977700 | -0.55998600 | 3.09936900  |
| C  | -1.78991600 | -0.29411500 | 2.33539700  |
| H  | -1.98923700 | 0.12200000  | 1.36053500  |
| N  | -0.58350100 | -0.53953200 | 2.83714100  |
| C  | -0.76688100 | -1.06998900 | 4.10252700  |
| H  | 0.07348100  | -1.36353800 | 4.71269900  |
| C  | 1.34990400  | 3.50696900  | 3.63756400  |
| N  | 2.66839100  | 3.34374900  | 3.23263100  |
| H  | 3.40613800  | 4.03149700  | 3.33993700  |
| C  | 2.82313300  | 2.13047000  | 2.67847600  |
| H  | 3.73705700  | 1.73734200  | 2.26520700  |
| N  | 1.65938700  | 1.48333800  | 2.71348200  |
| C  | 0.73219300  | 2.33212800  | 3.30191400  |
| H  | -0.29433000 | 2.03703200  | 3.44034200  |
| C  | 3.40588300  | -1.32656700 | 2.47559800  |
| O  | 2.26018300  | -1.39218300 | 3.06781600  |
| O  | 3.53642300  | -0.51895700 | 1.51499000  |
| C  | 6.10878700  | -0.40141400 | -1.63334700 |
| C  | 7.49160000  | -0.56218400 | -1.62246400 |
| C  | 8.05704500  | -1.75134200 | -1.14909700 |
| C  | 7.24199200  | -2.79057100 | -0.68698600 |
| C  | 5.85681000  | -2.65020400 | -0.69406500 |
| C  | 5.31449600  | -1.45194100 | -1.16701600 |
| N  | 3.87053700  | -1.28026400 | -1.16021600 |
| O  | 3.17447200  | -2.25132900 | -0.80048500 |
| O  | 3.38828100  | -0.20533500 | -1.49358000 |
| H  | 5.64766100  | 0.50991300  | -1.99374600 |
| H  | 8.12732000  | 0.24026200  | -1.98312100 |
| H  | 9.13652900  | -1.86947400 | -1.14153000 |
| H  | 7.68499500  | -3.71124900 | -0.32069600 |
| H  | 5.20770200  | -3.44108300 | -0.34043700 |
| O  | 0.58656300  | 0.68387200  | 0.50897300  |
| O  | 0.97501700  | -1.57179900 | 0.57797800  |
| H  | 1.71068700  | -1.66452600 | -0.09765200 |
| H  | 5.48071300  | -1.85811400 | 2.56572400  |
| H  | 4.50481500  | -2.42286600 | 3.96672800  |
| H  | 4.34801500  | -3.22033600 | 2.39184200  |
| Fe | 1.23078500  | -0.25001900 | 1.77366800  |
| C  | 4.51603800  | -2.25593100 | 2.88654200  |
| C  | 0.84391900  | 4.75723000  | 4.27997000  |
| H  | 1.35636000  | 4.95542600  | 5.22897100  |
| H  | 0.99656000  | 5.62554800  | 3.62814300  |
| H  | -0.22628700 | 4.66345700  | 4.48158700  |
| H  | -3.50231800 | -0.80713300 | 5.97674200  |
| H  | -3.55494800 | -2.44057100 | 5.28998100  |
| H  | -2.20463300 | -1.96247900 | 6.33538000  |
| C  | -2.88737100 | -1.61223400 | 5.55664000  |

*Fe<sup>III</sup>-OOH and HO-Fe<sup>V</sup>=O attacks Model 1*

*Nitrobenzene Modell*

NBZ-RC-FeIII-modell:

|    |             |             |             |
|----|-------------|-------------|-------------|
| C  | -2.11593600 | -1.23575200 | 4.33813500  |
| N  | -2.72207100 | -0.89143800 | 3.13828200  |
| H  | -3.72178800 | -0.86982300 | 2.96830000  |
| C  | -1.77557100 | -0.60679000 | 2.22778100  |
| H  | -1.96974000 | -0.31991000 | 1.20584100  |
| N  | -0.57140700 | -0.74678200 | 2.77743900  |
| C  | -0.77161300 | -1.14149800 | 4.09131400  |
| H  | 0.05762100  | -1.34014400 | 4.75275800  |
| C  | 1.13853500  | 3.63359900  | 3.34462900  |
| N  | 1.74139200  | 3.81972100  | 2.10778000  |
| H  | 2.03664400  | 4.71093600  | 1.72322000  |
| C  | 1.87220800  | 2.63720400  | 1.48748900  |
| H  | 2.29130400  | 2.50140200  | 0.49918800  |
| N  | 1.37625800  | 1.67285800  | 2.26547800  |
| C  | 0.91683400  | 2.28549500  | 3.42488600  |
| H  | 0.46016300  | 1.71910000  | 4.22207000  |
| C  | 3.26632200  | -1.52389200 | 2.50592600  |
| O  | 2.19811400  | -1.60504600 | 3.19536800  |
| O  | 3.22644800  | -0.78982700 | 1.45663700  |
| C  | 3.07281100  | -0.72547700 | -2.88242100 |
| C  | 3.05754500  | -1.83697000 | -3.72281200 |
| C  | 2.04577200  | -1.98289000 | -4.67805700 |
| C  | 1.04118400  | -1.01729000 | -4.79844400 |
| C  | 1.03647200  | 0.09738000  | -3.96254600 |
| C  | 2.05704600  | 0.22417800  | -3.01881600 |
| N  | 2.05677900  | 1.38642200  | -2.13060900 |
| O  | 1.10484800  | 2.16447100  | -2.17826800 |
| O  | 3.02313400  | 1.53419200  | -1.37165300 |
| H  | 3.84874400  | -0.58652400 | -2.13942600 |
| H  | 3.83801800  | -2.58656300 | -3.63420400 |
| H  | 2.04251900  | -2.85015600 | -5.33187700 |
| H  | 0.25951500  | -1.13211200 | -5.54293500 |
| H  | 0.26609600  | 0.85529200  | -4.03496300 |
| O  | 0.60610600  | -0.47254500 | 0.05211400  |
| O  | 0.87012100  | -1.89687100 | 0.10895200  |
| H  | 1.72455600  | -1.95537400 | -0.36963000 |
| H  | 5.33129400  | -1.53776100 | 3.02707300  |
| H  | 4.36837800  | -2.83309700 | 3.80073300  |
| H  | 4.80618600  | -2.92431700 | 2.06815400  |
| Fe | 1.22225100  | -0.32789000 | 1.82020500  |
| C  | 4.51604600  | -2.25594800 | 2.88653900  |
| C  | 0.84391200  | 4.75725200  | 4.27997300  |
| H  | 1.75756700  | 5.29218400  | 4.56565700  |

|   |             |             |            |
|---|-------------|-------------|------------|
| H | 0.15876700  | 5.48419400  | 3.82705500 |
| H | 0.37719400  | 4.37156100  | 5.19002000 |
| H | -3.55712900 | -0.80413700 | 5.87492900 |
| H | -3.50061200 | -2.50493700 | 5.38378400 |
| H | -2.20069900 | -1.82804800 | 6.37944100 |
| C | -2.88737300 | -1.61223800 | 5.55664100 |

NBZ-RC-FeV-modell:

|    |             |             |             |
|----|-------------|-------------|-------------|
| C  | -2.10642800 | -1.18774200 | 4.35731000  |
| N  | -2.71235500 | -0.84280300 | 3.15853500  |
| H  | -3.70997000 | -0.85654800 | 2.97716100  |
| C  | -1.76591900 | -0.50030200 | 2.26522200  |
| H  | -1.96552000 | -0.18984900 | 1.25141600  |
| N  | -0.56470200 | -0.60118600 | 2.82530200  |
| C  | -0.76257800 | -1.03435900 | 4.12592300  |
| H  | 0.06609600  | -1.20670200 | 4.79591400  |
| C  | 1.36149500  | 3.50951600  | 3.64074200  |
| N  | 2.68470900  | 3.34459800  | 3.25484300  |
| H  | 3.42328500  | 4.03022400  | 3.37109600  |
| C  | 2.84439600  | 2.13159500  | 2.70073600  |
| H  | 3.76822100  | 1.74700500  | 2.30010600  |
| N  | 1.68080800  | 1.48389100  | 2.71705700  |
| C  | 0.74817400  | 2.33562400  | 3.29270000  |
| H  | -0.28306300 | 2.04850200  | 3.41706700  |
| C  | 3.39105300  | -1.34883800 | 2.46840300  |
| O  | 2.24830100  | -1.41859400 | 3.06585200  |
| O  | 3.49725700  | -0.54637900 | 1.49963700  |
| C  | 4.37048500  | -0.12779400 | -4.18741300 |
| C  | 5.28564300  | -0.36061100 | -5.20994400 |
| C  | 5.80514300  | -1.64422100 | -5.40930300 |
| C  | 5.41235400  | -2.70504200 | -4.58621600 |
| C  | 4.50045300  | -2.49216300 | -3.55584100 |
| C  | 3.99548100  | -1.20156400 | -3.37503300 |
| N  | 3.04482200  | -0.95611500 | -2.29881200 |
| O  | 2.76062600  | -1.91110500 | -1.54971000 |
| O  | 2.56404200  | 0.16407000  | -2.16774300 |
| H  | 3.95497100  | 0.85738000  | -4.01484300 |
| H  | 5.59288800  | 0.45967300  | -5.85092300 |
| H  | 6.51847700  | -1.81840700 | -6.20945200 |
| H  | 5.81649400  | -3.69968300 | -4.74582100 |
| H  | 4.18444700  | -3.29923600 | -2.90670700 |
| O  | 0.59010300  | 0.68594300  | 0.54286800  |
| O  | 1.00984100  | -1.54498100 | 0.52552900  |
| H  | 1.64285600  | -1.49937400 | -0.24772600 |
| H  | 5.47608700  | -1.84075600 | 2.57299500  |
| H  | 4.50272800  | -2.42095000 | 3.96709400  |
| H  | 4.37478600  | -3.22601600 | 2.39360300  |
| Fe | 1.26360700  | -0.26779400 | 1.77777000  |
| C  | 4.51604700  | -2.25594900 | 2.88653900  |



|   |             |             |            |
|---|-------------|-------------|------------|
| C | 0.84391200  | 4.75725300  | 4.27997300 |
| H | 1.33959200  | 4.95413000  | 5.23814100 |
| H | 1.00350300  | 5.62961900  | 3.63517600 |
| H | -0.22904000 | 4.66150600  | 4.46504300 |
| H | -3.58487600 | -0.82967900 | 5.87918800 |
| H | -3.47165700 | -2.51830800 | 5.35493200 |
| H | -2.20927900 | -1.82556500 | 6.38726000 |
| C | -2.88737300 | -1.61223800 | 5.55664100 |

NBZ-FeIII-O-C2-concerted-TS-model1:

|    |             |             |             |
|----|-------------|-------------|-------------|
| C  | -3.72403100 | 2.22846000  | 0.18992300  |
| N  | -2.64587700 | 3.10209600  | 0.21576800  |
| H  | -2.70169500 | 4.09974600  | 0.38811900  |
| C  | -1.51556300 | 2.41780500  | -0.03685400 |
| H  | -0.53156100 | 2.85622100  | -0.08655800 |
| N  | -1.80175600 | 1.13217900  | -0.22365500 |
| C  | -3.17512300 | 1.00450600  | -0.08803900 |
| H  | -3.66524900 | 0.05193100  | -0.21470000 |
| C  | -0.33632900 | -1.73038800 | 3.25870700  |
| N  | 0.13004700  | -2.83339100 | 2.56048200  |
| H  | 0.41251400  | -3.71588300 | 2.97242300  |
| C  | 0.16272600  | -2.54633700 | 1.24727300  |
| H  | 0.48645400  | -3.22679500 | 0.47581000  |
| N  | -0.25985600 | -1.29980700 | 1.04692500  |
| C  | -0.57426200 | -0.78465200 | 2.29594900  |
| H  | -0.95600700 | 0.21704200  | 2.41670800  |
| C  | -1.36012100 | -2.41761700 | -1.93315200 |
| O  | -2.16022500 | -1.52153100 | -1.52737400 |
| O  | -0.10465000 | -2.23944600 | -1.72976900 |
| C  | 2.48081300  | 2.96241000  | 1.07990900  |
| C  | 2.68624300  | 2.41934600  | -0.18019500 |
| C  | 2.88784400  | 1.01652400  | -0.34850100 |
| C  | 2.97048300  | 0.23298700  | 0.83523400  |
| H  | 2.31451200  | 4.02934900  | 1.19088700  |
| H  | 2.67584300  | 3.04616500  | -1.06544100 |
| H  | 3.33642300  | 0.63765200  | -1.25584900 |
| O  | 1.12810400  | 0.63122800  | -1.04082800 |
| O  | -0.07854600 | 0.47221100  | -2.59823700 |
| H  | 0.53529300  | -0.12460000 | -3.07050800 |
| Fe | -0.45696500 | -0.36116200 | -0.83589700 |
| C  | -5.12953100 | 2.66656900  | 0.42898500  |
| H  | -5.24882800 | 3.11429600  | 1.42333300  |
| H  | -5.45079500 | 3.40895500  | -0.31173200 |
| H  | -5.80257300 | 1.80783900  | 0.36089900  |
| C  | -0.49286900 | -1.71345200 | 4.74210000  |
| H  | -1.19392900 | -2.48505400 | 5.08257300  |
| H  | 0.46397000  | -1.88702200 | 5.24968500  |
| H  | -0.87687500 | -0.74193200 | 5.06474100  |
| C  | -1.84000100 | -3.65014300 | -2.64359500 |

|   |             |             |             |
|---|-------------|-------------|-------------|
| H | -1.46410200 | -3.64237000 | -3.67334700 |
| H | -1.43573100 | -4.54291100 | -2.15470600 |
| H | -2.93068300 | -3.69235900 | -2.65585900 |
| C | 2.51461700  | 2.13906100  | 2.21509000  |
| H | 2.36358200  | 2.56613400  | 3.20152700  |
| C | 2.76156700  | 0.76337700  | 2.09560800  |
| H | 2.81615600  | 0.12639700  | 2.96917600  |
| N | 3.30729500  | -1.18713500 | 0.70280600  |
| O | 3.52897700  | -1.61814100 | -0.42889100 |
| O | 3.35871600  | -1.86656000 | 1.72962800  |

NBZ-FeIII-O1-C2-concerted-TS-model1:

|    |             |             |             |
|----|-------------|-------------|-------------|
| Fe | 0.91550000  | -0.55014500 | -0.14643800 |
| O  | 0.22969500  | -0.83040200 | -1.74139700 |
| O  | -1.36247800 | -0.36578600 | -0.53105300 |
| H  | -1.58647500 | -1.21961400 | -0.96474200 |
| C  | -2.71144200 | -0.30148600 | 0.58835400  |
| N  | -4.17903500 | -1.52739900 | -0.99342500 |
| O  | -3.28455200 | -2.38402800 | -1.06114700 |
| C  | -3.85126000 | -0.28705000 | -0.29655700 |
| O  | -5.30112900 | -1.65353700 | -1.46987200 |
| C  | -4.58013700 | 0.84935700  | -0.56087600 |
| C  | -4.24380600 | 2.03168700  | 0.12281000  |
| C  | -3.19907200 | 2.05911900  | 1.06294300  |
| C  | -2.46864500 | 0.91674000  | 1.32233500  |
| H  | -4.80981900 | 2.93513100  | -0.08160500 |
| H  | -2.98183600 | 2.97842400  | 1.59692500  |
| H  | -1.66043300 | 0.90746800  | 2.04563700  |
| H  | -2.50418500 | -1.23384000 | 1.10670200  |
| C  | 1.95333400  | 4.94548100  | 1.18047600  |
| C  | 1.57512300  | 3.67733200  | 0.49135100  |
| C  | 1.57520800  | 2.36850300  | 0.89963400  |
| N  | 1.11070700  | 3.63807500  | -0.81555000 |
| C  | 0.85075300  | 2.35962000  | -1.15316200 |
| N  | 1.12741900  | 1.55849600  | -0.13053800 |
| H  | 2.26727500  | 4.73219000  | 2.20573500  |
| H  | 1.11262700  | 5.64903700  | 1.22221400  |
| H  | 2.78270000  | 5.45056500  | 0.67017500  |
| H  | 0.98397900  | 4.44159500  | -1.42053500 |
| H  | 1.85709000  | 1.95701100  | 1.85707900  |
| H  | 0.47559000  | 2.04198600  | -2.11357400 |
| C  | 6.46181800  | -0.57835000 | -1.60858600 |
| C  | 5.12602500  | -0.89993700 | -1.02485700 |
| C  | 3.94344500  | -0.20811800 | -0.99055000 |
| N  | 4.85845800  | -2.08498100 | -0.35610300 |
| C  | 3.57419400  | -2.08592500 | 0.04858000  |
| N  | 2.98578600  | -0.95214300 | -0.31932300 |
| H  | 6.42814600  | 0.39856400  | -2.09806100 |
| H  | 6.76256800  | -1.32258300 | -2.35592900 |

|   |             |             |             |
|---|-------------|-------------|-------------|
| H | 7.24155300  | -0.54632000 | -0.83759300 |
| H | 5.52201800  | -2.83523300 | -0.19888000 |
| H | 3.72218400  | 0.76557300  | -1.39942200 |
| H | 3.09400600  | -2.89252200 | 0.57957000  |
| C | 0.03212800  | -2.48520700 | 3.26856700  |
| C | 0.37678100  | -1.72044700 | 2.01834400  |
| O | 0.39152800  | -0.44970200 | 1.99766200  |
| O | 0.65560600  | -2.35136800 | 0.94099300  |
| H | -0.82532700 | -3.13925500 | 3.07447300  |
| H | -0.19747000 | -1.80812500 | 4.09345700  |
| H | 0.87328400  | -3.13018700 | 3.54630900  |
| H | -5.39456200 | 0.82991400  | -1.27526600 |

NBZ-FeIII-O-C1-TS-modell1:

|   |              |             |             |
|---|--------------|-------------|-------------|
| C | -31.15922200 | 10.94849400 | 7.89056300  |
| N | -31.58554200 | 10.45160900 | 6.66965200  |
| H | -32.44255600 | 9.93416200  | 6.50998000  |
| C | -30.67499600 | 10.75800500 | 5.72397900  |
| H | -30.76458600 | 10.46524600 | 4.68848200  |
| N | -29.67086500 | 11.43749300 | 6.26637700  |
| C | -29.96593700 | 11.56163300 | 7.61605800  |
| H | -29.29998400 | 12.07315100 | 8.29563000  |
| C | -27.75373800 | 15.86597400 | 7.35638700  |
| N | -26.40580000 | 15.58788900 | 7.18924400  |
| H | -25.64166700 | 16.18015500 | 7.49450900  |
| C | -26.27175700 | 14.40633600 | 6.55860100  |
| H | -25.32902000 | 13.94634900 | 6.30455200  |
| N | -27.47178000 | 13.89378500 | 6.30208500  |
| C | -28.40180600 | 14.79829500 | 6.79157800  |
| H | -29.46336000 | 14.61469900 | 6.71519200  |
| C | -25.62916800 | 10.66898800 | 5.97320900  |
| O | -26.78591000 | 10.41612800 | 6.46275900  |
| O | -25.49267000 | 11.61329400 | 5.13583700  |
| C | -27.85728300 | 9.73606000  | 0.90138100  |
| C | -27.02880900 | 9.78231400  | -0.19890100 |
| C | -27.14543400 | 10.82169500 | -1.14323000 |
| C | -28.13125400 | 11.81868300 | -0.98683300 |
| C | -28.97493900 | 11.80754400 | 0.10039600  |
| C | -28.77691200 | 10.82027500 | 1.13252400  |
| N | -29.98340400 | 10.50103900 | 1.97295400  |
| O | -30.90652200 | 11.30832000 | 1.98161500  |
| O | -29.95213000 | 9.46581900  | 2.63557400  |
| H | -27.80749800 | 8.92918500  | 1.62101800  |
| H | -26.29821100 | 8.99412300  | -0.35159600 |
| H | -26.49284400 | 10.83966200 | -2.01030500 |
| H | -28.24523100 | 12.58773300 | -1.74447500 |
| H | -29.75900300 | 12.54339700 | 0.22705000  |
| O | -28.04073000 | 11.85080400 | 2.40863500  |
| O | -27.55658300 | 11.05010500 | 3.49113600  |

|    |              |             |            |
|----|--------------|-------------|------------|
| H  | -26.57843700 | 11.09138000 | 3.39825600 |
| H  | -24.22231500 | 10.11198900 | 7.47371800 |
| H  | -24.71167200 | 8.78405100  | 6.42068900 |
| H  | -23.57646900 | 10.03221400 | 5.81475600 |
| Fe | -27.76353900 | 11.96868800 | 5.53730300 |
| C  | -24.45601000 | 9.84800300  | 6.43499700 |
| C  | -28.24600000 | 17.09400400 | 8.04400200 |
| H  | -27.89045100 | 17.14283100 | 9.08048700 |
| H  | -27.91063300 | 18.00486100 | 7.53307400 |
| H  | -29.33921600 | 17.09855300 | 8.06007600 |
| H  | -32.92644900 | 11.18198100 | 9.09903700 |
| H  | -32.01232100 | 9.69975900  | 9.41740700 |
| H  | -31.39103500 | 11.26027900 | 9.98113800 |
| C  | -31.91499600 | 10.76200000 | 9.16099600 |

NBZ-FeIII-O-C2-TS-modell1:

|   |              |             |            |
|---|--------------|-------------|------------|
| C | -31.18364900 | 11.06046900 | 7.89743600 |
| N | -31.78611300 | 11.09447300 | 6.65015800 |
| H | -32.76939600 | 10.93030400 | 6.46603400 |
| C | -30.85213100 | 11.38155500 | 5.71852000 |
| H | -31.05880600 | 11.46242600 | 4.66246400 |
| N | -29.66724300 | 11.53758800 | 6.29475100 |
| C | -29.86538400 | 11.33980600 | 7.65183200 |
| H | -29.05036500 | 11.40376000 | 8.35823400 |
| C | -27.74497900 | 15.89804900 | 7.31058500 |
| N | -26.41336500 | 15.72828300 | 6.96369600 |
| H | -25.66732800 | 16.38896100 | 7.15079100 |
| C | -26.26578500 | 14.54692000 | 6.33638900 |
| H | -25.33114800 | 14.15276300 | 5.96983300 |
| N | -27.44158900 | 13.93201700 | 6.25358200 |
| C | -28.37005800 | 14.76781300 | 6.85492200 |
| H | -29.41285500 | 14.49735400 | 6.92677400 |
| C | -25.60622400 | 10.68949400 | 5.95391400 |
| O | -26.80702100 | 10.29989700 | 6.23165700 |
| O | -25.43290600 | 11.76393400 | 5.32394200 |
| C | -30.56024000 | 12.10366300 | 1.22093300 |
| C | -30.69431300 | 10.74962600 | 0.86657600 |
| C | -29.56700400 | 9.99074900  | 0.49754700 |
| C | -28.30867000 | 10.56379700 | 0.49897200 |
| C | -28.11921500 | 11.90882100 | 0.96434000 |
| C | -29.30314400 | 12.67308000 | 1.22213800 |
| N | -29.14984600 | 14.07916400 | 1.57593200 |
| O | -28.01702400 | 14.56383300 | 1.52222500 |
| O | -30.15773900 | 14.70591400 | 1.91442200 |
| H | -31.42711600 | 12.70478400 | 1.46767700 |
| H | -31.68127600 | 10.29855200 | 0.85549400 |
| H | -29.69396600 | 8.95835400  | 0.18634900 |
| H | -27.43488200 | 9.99670200  | 0.19551200 |
| H | -27.22111700 | 12.44451900 | 0.67805800 |

|    |              |             |             |
|----|--------------|-------------|-------------|
| O  | -27.36612600 | 11.63370000 | 2.65281200  |
| O  | -28.32532900 | 11.09573500 | 3.55248100  |
| H  | -28.15393300 | 10.13026000 | 3.52575100  |
| H  | -23.50347500 | 10.23813800 | 6.07095000  |
| H  | -24.45080200 | 9.83914900  | 7.53154100  |
| H  | -24.58399100 | 8.81183800  | 6.10409600  |
| Fe | -27.71959500 | 11.98061700 | 5.55844300  |
| C  | -24.45600500 | 9.84800300  | 6.43499900  |
| C  | -28.24600000 | 17.09400100 | 8.04400100  |
| H  | -27.74975300 | 17.20546800 | 9.01600900  |
| H  | -28.07664300 | 18.01741100 | 7.47659300  |
| H  | -29.32063900 | 16.99948000 | 8.22180500  |
| H  | -32.72129800 | 11.48261500 | 9.34528300  |
| H  | -32.36336400 | 9.76101100  | 9.14284900  |
| H  | -31.22261700 | 10.80542600 | 10.00612600 |
| C  | -31.91499900 | 10.76200000 | 9.16099800  |

NBZ-FeV-O-C1-TS-modell1:

|   |              |             |            |
|---|--------------|-------------|------------|
| C | -31.10365400 | 11.13534200 | 7.96296800 |
| N | -31.61168400 | 11.07928700 | 6.67539700 |
| H | -32.55652700 | 10.80843600 | 6.42734000 |
| C | -30.64678300 | 11.43823400 | 5.80397800 |
| H | -30.77526100 | 11.46253700 | 4.73366800 |
| N | -29.53324100 | 11.73666400 | 6.45896800 |
| C | -29.80382300 | 11.55027800 | 7.80434200 |
| H | -29.05231900 | 11.72229800 | 8.56063000 |
| C | -27.70482400 | 15.77963600 | 7.57115000 |
| N | -26.35334300 | 15.46126100 | 7.61661600 |
| H | -25.61850200 | 16.05938600 | 7.97803900 |
| C | -26.16284500 | 14.23641100 | 7.09750700 |
| H | -25.20334400 | 13.76059100 | 6.97717500 |
| N | -27.33229300 | 13.72211500 | 6.72349100 |
| C | -28.29900100 | 14.67813800 | 7.01251600 |
| H | -29.34077000 | 14.51118800 | 6.78953100 |
| C | -25.51897800 | 10.87086800 | 6.11558100 |
| O | -26.72043900 | 10.68948200 | 6.56422400 |
| O | -25.30312700 | 11.87007400 | 5.38439400 |
| C | -29.12261900 | 12.95299300 | 1.89995700 |
| C | -29.13156400 | 11.67437200 | 1.38853600 |
| C | -27.91840900 | 10.98590500 | 1.18669600 |
| C | -26.68022900 | 11.59777600 | 1.46503200 |
| C | -26.64062800 | 12.87421500 | 1.98007300 |
| C | -27.87243000 | 13.52963500 | 2.27300900 |
| N | -27.83151100 | 15.01020900 | 2.47229300 |
| O | -26.72924200 | 15.53338800 | 2.59351600 |
| O | -28.90366300 | 15.60536800 | 2.49691900 |
| H | -30.02996100 | 13.52485900 | 2.04682400 |
| H | -30.07194400 | 11.20055900 | 1.12643400 |
| H | -27.93704400 | 9.98043100  | 0.77741100 |

|    |              |             |             |
|----|--------------|-------------|-------------|
| H  | -25.75615800 | 11.06580600 | 1.26424600  |
| H  | -25.70931000 | 13.38405900 | 2.19074700  |
| O  | -27.98811700 | 13.33554200 | 4.24209700  |
| O  | -27.91914700 | 10.81271300 | 4.26698800  |
| H  | -27.75293900 | 9.98709700  | 4.76357000  |
| H  | -23.46876000 | 10.22282900 | 6.15862700  |
| H  | -24.48024600 | 9.59040700  | 7.49828300  |
| H  | -24.66769700 | 8.93398200  | 5.86719800  |
| Fe | -27.61720600 | 12.12686100 | 5.44995500  |
| C  | -24.45600800 | 9.84800700  | 6.43499900  |
| C  | -28.24600000 | 17.09400000 | 8.04400100  |
| H  | -28.04884600 | 17.24987400 | 9.11151700  |
| H  | -27.79453400 | 17.92769400 | 7.49323600  |
| H  | -29.32725600 | 17.12779200 | 7.88707200  |
| H  | -32.81737400 | 11.37939800 | 9.24742100  |
| H  | -32.23186800 | 9.71271200  | 9.11760200  |
| H  | -31.32391000 | 10.89813400 | 10.07062000 |
| C  | -31.91499500 | 10.76200000 | 9.16099500  |

NBZ-FeV-O-C2-TS-modell1:

|   |             |             |             |
|---|-------------|-------------|-------------|
| C | -2.12422400 | -1.14352300 | 4.36198100  |
| N | -2.74760300 | -0.59365800 | 3.25220400  |
| H | -3.74767800 | -0.46894600 | 3.14160700  |
| C | -1.81358400 | -0.25508500 | 2.34263200  |
| H | -2.02463700 | 0.19845800  | 1.38644500  |
| N | -0.60516200 | -0.55600300 | 2.80578500  |
| C | -0.78546500 | -1.11461800 | 4.05988600  |
| H | 0.05271200  | -1.45584100 | 4.64824600  |
| C | 1.35410100  | 3.50333100  | 3.64311400  |
| N | 2.66114300  | 3.35172700  | 3.19780800  |
| H | 3.39601700  | 4.04654300  | 3.27532900  |
| C | 2.80969200  | 2.13304900  | 2.65157200  |
| H | 3.72003100  | 1.75642600  | 2.21363600  |
| N | 1.65682700  | 1.46964500  | 2.72503100  |
| C | 0.74430900  | 2.31508600  | 3.33819000  |
| H | -0.27542300 | 2.01718300  | 3.51714000  |
| C | 3.36745800  | -1.35994000 | 2.49421000  |
| O | 2.26340100  | -1.38808900 | 3.14174600  |
| O | 3.44048000  | -0.61118800 | 1.47025700  |
| C | -0.71148000 | 2.58676100  | -2.17279100 |
| C | -1.96342600 | 1.95242800  | -2.04944400 |
| C | -2.04956600 | 0.60672400  | -1.66900200 |
| C | -0.89548300 | -0.11400500 | -1.38711500 |
| C | 0.38168200  | 0.51410600  | -1.44915700 |
| C | 0.42970700  | 1.86002900  | -1.90719200 |
| N | 1.74047600  | 2.49360400  | -2.05297900 |
| O | 2.73657200  | 1.79710700  | -1.84924900 |
| O | 1.77510200  | 3.68252300  | -2.37160900 |
| H | -0.63897000 | 3.62103300  | -2.48619700 |

|    |             |             |             |
|----|-------------|-------------|-------------|
| H  | -2.86470200 | 2.51705400  | -2.26583900 |
| H  | -3.01993800 | 0.12431300  | -1.60696200 |
| H  | -0.94070800 | -1.15479600 | -1.08792300 |
| H  | 1.28241200  | -0.08038200 | -1.48460300 |
| O  | 0.66849700  | 0.85461100  | 0.50596300  |
| O  | 1.05114000  | -1.70779300 | 0.65730500  |
| H  | 1.85499400  | -1.81310300 | 0.11190000  |
| H  | 5.46676500  | -1.81184700 | 2.58287700  |
| H  | 4.51017000  | -2.45284700 | 3.96140400  |
| H  | 4.39645200  | -3.21203000 | 2.36164100  |
| Fe | 1.23304800  | -0.27933500 | 1.72357100  |
| C  | 4.51604400  | -2.25594500 | 2.88653900  |
| C  | 0.84391400  | 4.75724800  | 4.27997300  |
| H  | 1.39198100  | 4.99557400  | 5.19938900  |
| H  | 0.93984100  | 5.61364900  | 3.60177300  |
| H  | -0.21280500 | 4.63997700  | 4.53374600  |
| H  | -3.45527200 | -0.79440800 | 6.01676100  |
| H  | -3.59715400 | -2.40601300 | 5.29364700  |
| H  | -2.19828000 | -2.01020100 | 6.30635000  |
| C  | -2.88737300 | -1.61223800 | 5.55664100  |

NBZ-FeV-O1-C2-TS-modell1:

|   |              |             |            |
|---|--------------|-------------|------------|
| C | -31.09526800 | 11.17369800 | 7.98385400 |
| N | -31.64832300 | 11.78628300 | 6.86830100 |
| H | -32.63132600 | 12.00304900 | 6.74435100 |
| C | -30.67383700 | 12.06068700 | 5.98284400 |
| H | -30.82301400 | 12.55242100 | 5.03415700 |
| N | -29.50342600 | 11.65172900 | 6.46731700 |
| C | -29.75326100 | 11.09401300 | 7.71017100 |
| H | -28.95783500 | 10.68284100 | 8.31299100 |
| C | -27.67196200 | 15.80435400 | 7.54310800 |
| N | -26.32682100 | 15.47888800 | 7.63332300 |
| H | -25.60148000 | 16.06701800 | 8.02777100 |
| C | -26.12913100 | 14.25464800 | 7.10233600 |
| H | -25.16722000 | 13.77218700 | 7.02936200 |
| N | -27.28199800 | 13.75912100 | 6.67316100 |
| C | -28.24732900 | 14.71763900 | 6.93608100 |
| H | -29.28192600 | 14.56820600 | 6.67140500 |
| C | -25.59485100 | 10.79845300 | 6.17660900 |
| O | -26.63000800 | 10.82062700 | 6.92808400 |
| O | -25.59911400 | 11.57521400 | 5.16333300 |
| H | -24.74737200 | 8.85109000  | 6.08202300 |
| H | -23.55891800 | 10.16644200 | 5.89989200 |
| H | -24.25551600 | 9.77557900  | 7.50790400 |
| C | -24.45600700 | 9.84800700  | 6.43500100 |
| C | -28.24599800 | 17.09399600 | 8.04400000 |
| H | -28.08633300 | 17.21293400 | 9.12254500 |
| H | -27.79243300 | 17.95671100 | 7.54138700 |
| H | -29.32234900 | 17.11721700 | 7.85383700 |

|    |              |             |            |
|----|--------------|-------------|------------|
| H  | -32.41227600 | 11.62355800 | 9.62295700 |
| H  | -32.69138100 | 10.04089800 | 8.87814500 |
| H  | -31.27636700 | 10.29443400 | 9.91504500 |
| C  | -31.91499800 | 10.76200100 | 9.16099800 |
| Fe | -27.64351100 | 11.98395200 | 5.57940900 |
| O  | -28.26984100 | 12.83158300 | 4.34564600 |
| C  | -26.94711000 | 9.89683400  | 2.73652900 |
| C  | -26.99351000 | 8.47300600  | 2.80369000 |
| C  | -27.79239700 | 10.53328500 | 1.78883900 |
| H  | -26.12413500 | 10.44830700 | 3.17180100 |
| C  | -27.90533900 | 7.75828700  | 2.04114300 |
| H  | -26.32421000 | 7.96553400  | 3.48947300 |
| C  | -28.71990200 | 9.83343200  | 1.04181000 |
| N  | -27.63511700 | 11.97506700 | 1.55529100 |
| C  | -28.77700800 | 8.43326600  | 1.17369100 |
| H  | -27.94484800 | 6.67623700  | 2.11224800 |
| H  | -29.36405200 | 10.35461600 | 0.34395900 |
| O  | -26.57467500 | 12.48929000 | 1.90167400 |
| O  | -28.55854700 | 12.56716100 | 0.99788600 |
| H  | -29.49482800 | 7.87611000  | 0.58017500 |
| O  | -27.93400300 | 10.10949800 | 4.59814100 |
| H  | -28.84258100 | 10.11983600 | 4.23792500 |

***Nitrobenzene FeV attack Model 1 B97D***

NBZ-FeV-RC-model1-B97D:

|   |             |             |             |
|---|-------------|-------------|-------------|
| C | -2.11660400 | -1.11015300 | 4.37660500  |
| N | -2.73685600 | -0.53860500 | 3.26961300  |
| H | -3.74026600 | -0.41417400 | 3.15819200  |
| C | -1.79796200 | -0.19027800 | 2.36139100  |
| H | -2.00210600 | 0.28080200  | 1.40755300  |
| N | -0.58635800 | -0.50804600 | 2.82903300  |
| C | -0.76816300 | -1.08068800 | 4.07655000  |
| H | 0.07163900  | -1.44087200 | 4.65997400  |
| C | 1.30511700  | 3.54857500  | 3.52774100  |
| N | 2.36119000  | 3.58951700  | 2.62074900  |
| H | 2.91170200  | 4.41567500  | 2.39649200  |
| C | 2.54621700  | 2.36403000  | 2.09332300  |
| H | 3.28983900  | 2.10781700  | 1.34994900  |
| N | 1.65674100  | 1.50733900  | 2.63137100  |
| C | 0.88010500  | 2.22791900  | 3.51255200  |
| H | 0.08065100  | 1.76343900  | 4.07734100  |
| C | 3.39089000  | -1.33251800 | 2.46888200  |
| O | 2.24777200  | -1.41083100 | 3.07713400  |
| O | 3.50748700  | -0.52902200 | 1.49432700  |
| C | 6.18913900  | -0.76369900 | -1.89184100 |
| C | 7.57919000  | -0.91986400 | -1.93914200 |
| C | 8.18307800  | -2.05902700 | -1.37638400 |
| C | 7.39675900  | -3.05186400 | -0.76400900 |



|    |             |             |             |
|----|-------------|-------------|-------------|
| C  | 6.00457300  | -2.91599300 | -0.71065400 |
| C  | 5.42180900  | -1.76758500 | -1.27562000 |
| N  | 3.96498000  | -1.60107800 | -1.21797300 |
| O  | 3.29445800  | -2.53677300 | -0.72392700 |
| O  | 3.45807800  | -0.56287600 | -1.64665400 |
| H  | 5.70283200  | 0.10962900  | -2.32160000 |
| H  | 8.19017200  | -0.15274000 | -2.41612400 |
| H  | 9.26733300  | -2.17401800 | -1.41598400 |
| H  | 7.86681100  | -3.93427900 | -0.32850700 |
| H  | 5.38173400  | -3.67486200 | -0.24281100 |
| O  | 0.63419200  | 0.67746300  | 0.45450000  |
| O  | 1.00621400  | -1.70957300 | 0.57837500  |
| H  | 1.76887600  | -1.84470800 | -0.05708900 |
| H  | 5.46679700  | -1.92242900 | 2.45071900  |
| H  | 4.58931900  | -2.30189800 | 3.98335100  |
| H  | 4.28161500  | -3.26917300 | 2.52129200  |
| Fe | 1.22138100  | -0.31122500 | 1.72138100  |
| C  | 4.51604700  | -2.25594900 | 2.88653900  |
| C  | 0.84391200  | 4.75725300  | 4.27997300  |
| H  | 1.63662800  | 5.13747400  | 4.94632800  |
| H  | 0.57284000  | 5.56836700  | 3.58354900  |
| H  | -0.03516600 | 4.50492100  | 4.88828400  |
| H  | -3.47460600 | -0.80434200 | 6.02479400  |
| H  | -3.58784100 | -2.41230400 | 5.26381300  |
| H  | -2.19368500 | -2.01719500 | 6.30669600  |
| C  | -2.88737300 | -1.61223800 | 5.55664100  |

NBZ-FeV-O-C1-TS-modell1-B97D:

|   |              |             |            |
|---|--------------|-------------|------------|
| C | -31.06623900 | 10.93321500 | 7.94290900 |
| N | -31.32308700 | 10.25457300 | 6.75622100 |
| H | -32.09494600 | 9.60955000  | 6.60517900 |
| C | -30.38708800 | 10.58817300 | 5.84065600 |
| H | -30.33230800 | 10.19583900 | 4.83305600 |
| N | -29.52922000 | 11.46393300 | 6.37758900 |
| C | -29.93839100 | 11.68848600 | 7.67836300 |
| H | -29.40839000 | 12.37074000 | 8.33294400 |
| C | -27.82874100 | 15.71392100 | 7.62967000 |
| N | -26.76314000 | 15.03315700 | 8.21422100 |
| H | -26.18084500 | 15.39013500 | 8.96800400 |
| C | -26.60388600 | 13.83432700 | 7.61224000 |
| H | -25.84847200 | 13.10503000 | 7.87212000 |
| N | -27.52672500 | 13.69826700 | 6.65274200 |
| C | -28.29531200 | 14.85736200 | 6.65655700 |
| H | -29.10146900 | 14.99623300 | 5.94782200 |
| C | -25.24230200 | 11.04204500 | 5.90076700 |
| O | -26.49743400 | 11.09399200 | 6.34477800 |
| O | -24.77657000 | 11.86072600 | 5.10264800 |
| C | -28.52154700 | 14.10023700 | 1.76351100 |
| C | -28.40545700 | 13.12995300 | 0.78146000 |

|    |              |             |             |
|----|--------------|-------------|-------------|
| C  | -27.28322000 | 12.26293900 | 0.76008600  |
| C  | -26.25393400 | 12.38519600 | 1.72284400  |
| C  | -26.33297900 | 13.35318900 | 2.71163300  |
| C  | -27.51819300 | 14.16142000 | 2.79114700  |
| N  | -27.43106500 | 15.44033800 | 3.59434400  |
| O  | -26.37549100 | 15.66201700 | 4.19074700  |
| O  | -28.42080700 | 16.17558100 | 3.60096700  |
| H  | -29.35787200 | 14.79441300 | 1.79787300  |
| H  | -29.17141500 | 13.04582700 | 0.01020900  |
| H  | -27.20434400 | 11.50565500 | -0.02103400 |
| H  | -25.38744300 | 11.72553200 | 1.68498000  |
| H  | -25.55877500 | 13.46658800 | 3.46459700  |
| O  | -28.51491200 | 13.24416100 | 4.19858400  |
| O  | -27.83152000 | 10.78925900 | 4.13118400  |
| H  | -27.38532900 | 10.02756000 | 4.56140400  |
| H  | -23.38125800 | 10.00578500 | 6.27225600  |
| H  | -24.66251500 | 9.67999200  | 7.50269100  |
| H  | -24.77450800 | 8.94500300  | 5.88715600  |
| Fe | -27.78557700 | 12.14423400 | 5.35144400  |
| C  | -24.45600800 | 9.84800700  | 6.43499900  |
| C  | -28.24600000 | 17.09400000 | 8.04400100  |
| H  | -28.53637400 | 17.12323300 | 9.10743400  |
| H  | -27.42618800 | 17.81600300 | 7.89523200  |
| H  | -29.10457600 | 17.41435300 | 7.43782600  |
| H  | -32.96318800 | 11.04099200 | 8.96067500  |
| H  | -31.90653800 | 9.71450900  | 9.50675400  |
| H  | -31.53514700 | 11.39838400 | 9.97249400  |
| C  | -31.91499500 | 10.76200000 | 9.16099500  |

NBZ-FeV-O-C2-TS-model1-B97D:

|   |             |             |            |
|---|-------------|-------------|------------|
| C | -2.11967600 | -1.09377800 | 4.38190300 |
| N | -2.72852900 | -0.40092600 | 3.33895500 |
| H | -3.72103900 | -0.18766100 | 3.27638300 |
| C | -1.79317300 | -0.06557400 | 2.42124500 |
| H | -1.98631100 | 0.47884400  | 1.50488200 |
| N | -0.59782500 | -0.50979300 | 2.81958200 |
| C | -0.78476900 | -1.14941300 | 4.03353200 |
| H | 0.04375400  | -1.60413500 | 4.56442500 |
| C | 1.33954800  | 3.52033800  | 3.59517400 |
| N | 2.54873400  | 3.47572800  | 2.90151400 |
| H | 3.20643300  | 4.24722400  | 2.81476500 |
| C | 2.71565600  | 2.24896800  | 2.36890600 |
| H | 3.55693100  | 1.93744000  | 1.76333900 |
| N | 1.66681700  | 1.47590400  | 2.69543300 |
| C | 0.80735700  | 2.25327000  | 3.45079500 |
| H | -0.12393300 | 1.85758700  | 3.83619500 |
| C | 3.37341600  | -1.35038000 | 2.46984400 |
| O | 2.25626900  | -1.39211800 | 3.11281300 |
| O | 3.46962000  | -0.59993900 | 1.44498800 |

|    |             |             |             |
|----|-------------|-------------|-------------|
| C  | -0.91921200 | 2.53225300  | -2.12532400 |
| C  | -2.16527600 | 1.90190700  | -1.90725400 |
| C  | -2.22925100 | 0.56022400  | -1.47635000 |
| C  | -1.05533200 | -0.15855900 | -1.24617100 |
| C  | 0.22069200  | 0.46863700  | -1.40820200 |
| C  | 0.24644400  | 1.80732000  | -1.90843400 |
| N  | 1.55835600  | 2.44702800  | -2.11597400 |
| O  | 2.57124400  | 1.76034200  | -1.91641900 |
| O  | 1.57671100  | 3.63348300  | -2.47195300 |
| H  | -0.86591600 | 3.56372400  | -2.46793000 |
| H  | -3.08235900 | 2.46440200  | -2.08479900 |
| H  | -3.19880200 | 0.08178400  | -1.33309800 |
| H  | -1.07888900 | -1.19073100 | -0.90205100 |
| H  | 1.12047400  | -0.13372800 | -1.47729900 |
| O  | 0.62519200  | 0.88531800  | 0.51935600  |
| O  | 1.04073800  | -1.72987200 | 0.61062900  |
| H  | 1.78886700  | -1.77409000 | -0.02275600 |
| H  | 5.47844100  | -1.81824100 | 2.58764500  |
| H  | 4.49501100  | -2.44349500 | 3.96936700  |
| H  | 4.39130400  | -3.22014300 | 2.36526900  |
| Fe | 1.20444800  | -0.28841600 | 1.70096100  |
| C  | 4.51604400  | -2.25594400 | 2.88653900  |
| C  | 0.84391400  | 4.75724700  | 4.27997300  |
| H  | 1.56583300  | 5.11433300  | 5.03320700  |
| H  | 0.68542500  | 5.57173300  | 3.55311900  |
| H  | -0.11040600 | 4.54646200  | 4.78206500  |
| H  | -3.40847600 | -0.79732200 | 6.08672400  |
| H  | -3.64550000 | -2.35023900 | 5.24485800  |
| H  | -2.19978300 | -2.10010900 | 6.26149300  |
| C  | -2.88737300 | -1.61223800 | 5.55664100  |

NBZ-FeV-O1-C2-TS-modell1-B97D:

|   |              |             |            |
|---|--------------|-------------|------------|
| C | -31.10680400 | 11.17993000 | 7.97504400 |
| N | -31.67040300 | 11.82669400 | 6.87861700 |
| H | -32.65458100 | 12.06334100 | 6.77864600 |
| C | -30.70040300 | 12.10069500 | 5.97817000 |
| H | -30.85266600 | 12.61643600 | 5.03785400 |
| N | -29.52509900 | 11.65862000 | 6.43857900 |
| C | -29.76223800 | 11.08141400 | 7.67209600 |
| H | -28.95850400 | 10.64709300 | 8.25603400 |
| C | -27.77065900 | 15.71881400 | 7.68049800 |
| N | -26.94378200 | 14.95747200 | 8.50430300 |
| H | -26.55813500 | 15.26147300 | 9.39511200 |
| C | -26.71476700 | 13.75722400 | 7.92514200 |
| H | -26.11837900 | 12.96270000 | 8.35559600 |
| N | -27.35624000 | 13.69982800 | 6.75368900 |
| C | -28.00936500 | 14.91230400 | 6.58763800 |
| H | -28.60143000 | 15.11142200 | 5.70209100 |
| C | -25.57307500 | 10.82583700 | 6.15075700 |

|    |              |             |            |
|----|--------------|-------------|------------|
| O  | -26.62737000 | 10.85847800 | 6.89352700 |
| O  | -25.53659200 | 11.59734000 | 5.13213900 |
| H  | -24.66955100 | 8.91402700  | 5.88759100 |
| H  | -23.49642800 | 10.24710800 | 6.07779700 |
| H  | -24.40472600 | 9.61531900  | 7.50800800 |
| C  | -24.45600700 | 9.84800800  | 6.43500100 |
| C  | -28.24599800 | 17.09399500 | 8.04400000 |
| H  | -28.82101800 | 17.08074800 | 8.98502100 |
| H  | -27.40061300 | 17.79035400 | 8.17416900 |
| H  | -28.89361200 | 17.48142000 | 7.24517900 |
| H  | -32.39616100 | 11.63020200 | 9.64227800 |
| H  | -32.71082300 | 10.05394200 | 8.87463600 |
| H  | -31.26508200 | 10.27212000 | 9.89944400 |
| C  | -31.91499800 | 10.76200100 | 9.16099800 |
| Fe | -27.63555300 | 12.04526800 | 5.52943600 |
| O  | -28.25318000 | 12.95947300 | 4.31133600 |
| C  | -26.94298500 | 9.97510800  | 2.77965000 |
| C  | -27.12350300 | 8.54712000  | 2.76816400 |
| C  | -27.67376200 | 10.73959700 | 1.81192100 |
| H  | -26.06602200 | 10.41835400 | 3.24390500 |
| C  | -28.07790000 | 7.96155100  | 1.94316900 |
| H  | -26.53173900 | 7.94748400  | 3.45869900 |
| C  | -28.64851200 | 10.16381800 | 1.00700300 |
| N  | -27.34373600 | 12.17109600 | 1.63545900 |
| C  | -28.85427000 | 8.76605100  | 1.07771200 |
| H  | -28.22928700 | 6.88216200  | 1.95920700 |
| H  | -29.21240400 | 10.77711500 | 0.30662600 |
| O  | -26.22857200 | 12.54234200 | 2.01619900 |
| O  | -28.18458400 | 12.89091200 | 1.08470300 |
| H  | -29.60940500 | 8.30838400  | 0.43804400 |
| O  | -27.99706000 | 10.23311400 | 4.52569600 |
| H  | -28.87807400 | 10.35197200 | 4.10849500 |

### ***2-nitrotoluene Model 1***

2NT-FeIII-RC-modell1:

|   |            |            |            |
|---|------------|------------|------------|
| C | -4.3217370 | -1.9786490 | -1.6292390 |
| N | -3.3836780 | -1.7898340 | -2.6344900 |
| H | -3.5274550 | -1.9867830 | -3.6190570 |
| C | -2.2420020 | -1.3292800 | -2.0960360 |
| H | -1.3437090 | -1.1090780 | -2.6520140 |
| N | -2.3895120 | -1.1999930 | -0.7796590 |
| C | -3.6802230 | -1.6057760 | -0.4775730 |
| H | -4.0459290 | -1.6115220 | 0.5376590  |
| C | -2.6373320 | 3.4471340  | 0.0975240  |
| N | -1.2892150 | 3.7392320  | 0.2530750  |
| H | -0.8834250 | 4.6689250  | 0.2364660  |
| C | -0.5966920 | 2.6019730  | 0.4210120  |
| H | 0.4774660  | 2.5458200  | 0.5406090  |

|    |            |            |            |
|----|------------|------------|------------|
| N  | -1.4362310 | 1.5651140  | 0.3848670  |
| C  | -2.7098330 | 2.0830150  | 0.1836800  |
| H  | -3.5759270 | 1.4426280  | 0.1119910  |
| C  | -0.9037500 | -1.1651900 | 2.8489090  |
| O  | -1.8644750 | -1.4914410 | 2.0785210  |
| O  | 0.0262420  | -0.4422040 | 2.3442530  |
| C  | 4.0855370  | -0.3636880 | 0.9462620  |
| C  | 4.9803610  | -1.4234920 | 1.0210330  |
| C  | 5.7217140  | -1.7720190 | -0.1114160 |
| C  | 5.5585400  | -1.0651530 | -1.3013600 |
| C  | 4.6541920  | 0.0014660  | -1.4270960 |
| C  | 3.9247580  | 0.3265780  | -0.2629020 |
| N  | 2.9449590  | 1.4138390  | -0.2520910 |
| O  | 2.5381690  | 1.8714170  | -1.3199380 |
| O  | 2.5568570  | 1.8299270  | 0.8493860  |
| H  | 3.5038950  | -0.0585260 | 1.8070760  |
| H  | 5.1034280  | -1.9646710 | 1.9539180  |
| H  | 6.4315570  | -2.5931430 | -0.0679310 |
| H  | 6.1492060  | -1.3397370 | -2.1705870 |
| O  | 0.5514340  | -0.7199260 | -0.5982600 |
| O  | 0.6547970  | -2.0575470 | -0.0481200 |
| H  | 1.3835640  | -1.9458950 | 0.5991270  |
| H  | -0.8189690 | -0.7263920 | 4.9309570  |
| H  | -1.7092110 | -2.2266220 | 4.5309620  |
| H  | 0.0774560  | -2.1690880 | 4.4494590  |
| Fe | -0.9459430 | -0.4293150 | 0.4972180  |
| C  | -0.8472300 | -1.6066430 | 4.2789850  |
| C  | -3.6744010 | 4.4974750  | -0.1207940 |
| H  | -3.7123750 | 5.2051540  | 0.7161470  |
| H  | -3.4759210 | 5.0715330  | -1.0339950 |
| H  | -4.6592490 | 4.0333760  | -0.2185390 |
| H  | -6.2554000 | -1.8313440 | -2.5593960 |
| H  | -5.6676220 | -3.4897640 | -2.3531360 |
| H  | -6.2472200 | -2.5757970 | -0.9500820 |
| C  | -5.6952300 | -2.4959330 | -1.8903330 |
| C  | 4.5491780  | 0.7058740  | -2.7563480 |
| H  | 3.5766080  | 0.5310120  | -3.2273380 |
| H  | 4.6599100  | 1.7901200  | -2.6579130 |
| H  | 5.3302890  | 0.3355110  | -3.4265640 |

2NT-FeIII-O-C1-concerted-TS-modell1:

|    |            |            |            |
|----|------------|------------|------------|
| Fe | -0.6031240 | -0.0270110 | 0.9391880  |
| C  | 2.6340610  | -1.2376610 | -1.2646830 |
| C  | 3.1246210  | -2.5446740 | -1.1721810 |
| C  | 3.8391870  | -2.9912800 | -0.0634830 |
| C  | 4.0922600  | -2.1395100 | 1.0313220  |
| C  | 3.6109250  | -0.8548030 | 1.0056140  |
| C  | 2.8088660  | -0.4137620 | -0.0953030 |
| N  | 2.6656830  | 1.0630700  | -0.1748500 |

|   |            |            |            |
|---|------------|------------|------------|
| O | 2.6781690  | 1.6861220  | 0.8844850  |
| O | 2.5699340  | 1.5817770  | -1.2847080 |
| H | 2.9630080  | -3.2159170 | -2.0098730 |
| H | 4.2226950  | -4.0073500 | -0.0521030 |
| H | 4.6756310  | -2.4898210 | 1.8762240  |
| H | 3.7927420  | -0.1591580 | 1.8149600  |
| O | 1.0779920  | -0.8822310 | 0.6401110  |
| O | -0.2082230 | -1.6353540 | 1.9994130  |
| H | 0.4154450  | -1.3883440 | 2.7089500  |
| C | 1.9499240  | -0.8042250 | -2.5267990 |
| H | 1.0762140  | -0.1787470 | -2.3369820 |
| H | 2.6340180  | -0.2100240 | -3.1445740 |
| H | 1.6481370  | -1.6842250 | -3.1025010 |
| C | -5.0883620 | -2.4456550 | -1.7185780 |
| C | -3.7300720 | -2.0931300 | -1.2086910 |
| C | -3.2356510 | -0.9850770 | -0.5693150 |
| N | -2.6466480 | -2.9545630 | -1.3082110 |
| C | -1.5684930 | -2.3767270 | -0.7478530 |
| N | -1.8910550 | -1.1714300 | -0.2896500 |
| H | -5.7813760 | -1.6210660 | -1.5315760 |
| H | -5.4820100 | -3.3394350 | -1.2192900 |
| H | -5.0763750 | -2.6431240 | -2.7975150 |
| H | -2.6662250 | -3.8784280 | -1.7253110 |
| H | -3.7517020 | -0.0815450 | -0.2819280 |
| H | -0.5968780 | -2.8375900 | -0.6654910 |
| C | -0.6754850 | 3.5215230  | -3.5993360 |
| C | -0.5948400 | 2.9344170  | -2.2254910 |
| C | -0.8431220 | 1.6777240  | -1.7352660 |
| N | -0.1740930 | 3.6612660  | -1.1212690 |
| C | -0.1688150 | 2.8645250  | -0.0380990 |
| N | -0.5684680 | 1.6404960  | -0.3737460 |
| H | -1.0440050 | 2.7717220  | -4.3044120 |
| H | 0.3094160  | 3.8597260  | -3.9436250 |
| H | -1.3553320 | 4.3814410  | -3.6307070 |
| H | 0.1025660  | 4.6368620  | -1.1287900 |
| H | -1.2016550 | 0.8063190  | -2.2616520 |
| H | 0.1400690  | 3.1691590  | 0.9491940  |
| C | -1.8948290 | 1.5612350  | 4.3652030  |
| C | -1.4921460 | 1.0837430  | 2.9948600  |
| O | -2.3142430 | 0.5287760  | 2.2074570  |
| O | -0.2652870 | 1.1728200  | 2.6172770  |
| H | -1.3271710 | 2.4527000  | 4.6450020  |
| H | -1.6611600 | 0.7695020  | 5.0882160  |
| H | -2.9676720 | 1.7625030  | 4.4051890  |

2NT-FeIII-O-C2-concerted-TS-modell1:

|   |            |           |            |
|---|------------|-----------|------------|
| O | -0.3158220 | 0.6303350 | -1.6227110 |
| O | 0.9756040  | 2.1094830 | -1.7295460 |
| H | 1.5115770  | 1.6582130 | -2.4086890 |

|    |            |            |            |
|----|------------|------------|------------|
| Fe | 0.7830840  | 0.9469400  | -0.1231760 |
| C  | -3.3082480 | -1.1813040 | -0.4872410 |
| C  | -2.7620570 | -2.3850080 | -1.0042490 |
| C  | -1.8957980 | -2.4154520 | -2.0964560 |
| C  | -1.5575070 | -1.2338420 | -2.7453360 |
| C  | -2.0481370 | 0.0073330  | -2.2592290 |
| C  | -2.9301150 | -0.0099380 | -1.1387680 |
| N  | -3.4318080 | 1.3028900  | -0.7168740 |
| O  | -3.4578370 | 2.2009910  | -1.5591340 |
| O  | -3.7860940 | 1.4420560  | 0.4546130  |
| H  | -3.0470440 | -3.3168970 | -0.5243880 |
| H  | -1.5163720 | -3.3665270 | -2.4566450 |
| H  | -0.9242400 | -1.2352360 | -3.6255800 |
| H  | -2.0743640 | 0.8733110  | -2.9045650 |
| C  | -4.2697860 | -1.2698410 | 0.6705380  |
| H  | -3.8083800 | -0.9187460 | 1.5989330  |
| H  | -5.1615310 | -0.6576030 | 0.5101770  |
| H  | -4.5808500 | -2.3088920 | 0.8091710  |
| C  | 5.9319730  | -1.6107170 | -0.3607780 |
| C  | 4.5286060  | -1.1751040 | -0.6275530 |
| C  | 3.6730610  | -0.3372380 | 0.0425210  |
| N  | 3.8074070  | -1.6050930 | -1.7309780 |
| C  | 2.5845020  | -1.0417130 | -1.7077760 |
| N  | 2.4673310  | -0.2625720 | -0.6356450 |
| H  | 6.3093370  | -1.1155160 | 0.5378050  |
| H  | 6.5958290  | -1.3541500 | -1.1949790 |
| H  | 5.9946910  | -2.6944590 | -0.2038400 |
| H  | 4.1488900  | -2.2344800 | -2.4488520 |
| H  | 3.8411660  | 0.2208150  | 0.9509440  |
| H  | 1.8237630  | -1.1997420 | -2.4564160 |
| C  | -0.6408360 | -3.7145920 | 2.9543220  |
| C  | -0.4264930 | -2.3211990 | 2.4590400  |
| C  | 0.2115880  | -1.8194450 | 1.3540110  |
| N  | -0.9056260 | -1.2012440 | 3.1236350  |
| C  | -0.5600920 | -0.0956390 | 2.4379330  |
| N  | 0.1191110  | -0.4353390 | 1.3451540  |
| H  | -0.2041430 | -4.4305090 | 2.2529720  |
| H  | -1.7085890 | -3.9435030 | 3.0559800  |
| H  | -0.1722050 | -3.8700760 | 3.9337410  |
| H  | -1.4129660 | -1.2086020 | 4.0019060  |
| H  | 0.7272740  | -2.3569950 | 0.5735600  |
| H  | -0.8206230 | 0.9108240  | 2.7244480  |
| C  | 1.1593920  | 4.3175910  | 1.9509110  |
| C  | 1.0750330  | 2.9671070  | 1.2960380  |
| O  | 2.1034130  | 2.2749940  | 1.0334100  |
| O  | -0.0684420 | 2.5003830  | 0.9325850  |
| H  | 0.2979820  | 4.4830330  | 2.6034030  |
| H  | 1.1372160  | 5.0824080  | 1.1640450  |
| H  | 2.0914160  | 4.4204750  | 2.5110910  |

2NT-FeIII-O1-C2-concerted-TS-model1:

|    |            |            |            |
|----|------------|------------|------------|
| Fe | 0.9337980  | -0.5506180 | -0.1208220 |
| O  | 0.2729670  | -0.8109190 | -1.7492230 |
| O  | -1.3137250 | -0.4266010 | -0.5558430 |
| H  | -1.5718000 | -1.3268680 | -0.8548110 |
| C  | -2.7033020 | -0.2918300 | 0.6514130  |
| N  | -4.1251790 | -1.7650110 | -0.6887520 |
| O  | -3.1466330 | -2.5263820 | -0.7936540 |
| C  | -3.8688510 | -0.4228960 | -0.1868500 |
| O  | -5.2729690 | -2.0922830 | -0.9740970 |
| C  | -4.6590000 | 0.6566050  | -0.5677850 |
| C  | -4.3029140 | 1.9112500  | -0.0109840 |
| C  | -3.2469260 | 2.0695950  | 0.8972130  |
| C  | -2.4718300 | 0.9850720  | 1.2588220  |
| C  | -5.8280060 | 0.5889140  | -1.5154040 |
| H  | -4.8908740 | 2.7774800  | -0.2998350 |
| H  | -3.0530860 | 3.0486570  | 1.3240930  |
| H  | -1.6527370 | 1.0724300  | 1.9632810  |
| H  | -2.4033110 | -1.1715950 | 1.2113820  |
| H  | -6.0834380 | 1.5959740  | -1.8555900 |
| H  | -5.6161150 | -0.0344350 | -2.3886840 |
| H  | -6.7077340 | 0.1607310  | -1.0231280 |
| C  | 1.9533340  | 4.9454810  | 1.1804760  |
| C  | 1.5764880  | 3.6707860  | 0.5028730  |
| C  | 1.5952940  | 2.3639300  | 0.9160350  |
| N  | 1.0934610  | 3.6224430  | -0.7973550 |
| C  | 0.8401140  | 2.3422100  | -1.1280130 |
| N  | 1.1401180  | 1.5469130  | -0.1058220 |
| H  | 2.2800600  | 4.7404000  | 2.2033540  |
| H  | 1.1077270  | 5.6426490  | 1.2272010  |
| H  | 2.7732860  | 5.4530280  | 0.6576480  |
| H  | 0.9486790  | 4.4232560  | -1.4021220 |
| H  | 1.8950130  | 1.9583770  | 1.8704770  |
| H  | 0.4531360  | 2.0173350  | -2.0812340 |
| C  | 6.4618190  | -0.5783500 | -1.6085860 |
| C  | 5.1310840  | -0.8969390 | -1.0111630 |
| C  | 3.9508740  | -0.2022120 | -0.9635890 |
| N  | 4.8670450  | -2.0835840 | -0.3434530 |
| C  | 3.5878070  | -2.0846670 | 0.0733440  |
| N  | 2.9981370  | -0.9475490 | -0.2850050 |
| H  | 6.4274950  | 0.4019900  | -2.0910060 |
| H  | 6.7490820  | -1.3194330 | -2.3641980 |
| H  | 7.2502120  | -0.5556590 | -0.8462820 |
| H  | 5.5307410  | -2.8355590 | -0.1942260 |
| H  | 3.7276230  | 0.7731420  | -1.3670680 |
| H  | 3.1114450  | -2.8929230 | 0.6050360  |
| C  | 0.0321280  | -2.4852070 | 3.2685670  |
| C  | 0.3956010  | -1.7214130 | 2.0256140  |
| O  | 0.4233330  | -0.4513680 | 2.0019650  |



|   |            |            |           |
|---|------------|------------|-----------|
| O | 0.6784650  | -2.3488740 | 0.9445310 |
| H | -0.8248800 | -3.1358110 | 3.0618260 |
| H | -0.2055950 | -1.8068540 | 4.0899070 |
| H | 0.8674510  | -3.1332950 | 3.5567150 |

2NT-FeV-RC-modell1:

|    |            |            |            |
|----|------------|------------|------------|
| C  | -4.8730080 | -2.3187430 | -0.6453820 |
| N  | -4.2230510 | -2.3881570 | -1.8684060 |
| H  | -4.5747680 | -2.8592720 | -2.6945730 |
| C  | -3.0486920 | -1.7358010 | -1.7852310 |
| H  | -2.3456440 | -1.6403270 | -2.5977960 |
| N  | -2.8973470 | -1.2402260 | -0.5611470 |
| C  | -4.0239400 | -1.6017070 | 0.1597650  |
| H  | -4.1422190 | -1.3273550 | 1.1971420  |
| C  | -3.3353690 | 3.3405950  | -0.1876730 |
| N  | -2.3543120 | 3.6931970  | 0.7285180  |
| H  | -2.2304810 | 4.6149490  | 1.1332810  |
| C  | -1.5862710 | 2.6250040  | 0.9995030  |
| H  | -0.7371280 | 2.6218110  | 1.6633830  |
| N  | -2.0331780 | 1.5763000  | 0.3105280  |
| C  | -3.1162940 | 2.0126590  | -0.4397250 |
| H  | -3.6537850 | 1.3494920  | -1.0975740 |
| C  | -0.4053370 | -0.3127040 | 2.4888810  |
| O  | -1.4829900 | -0.8152170 | 1.9858510  |
| O  | 0.3108800  | 0.4076310  | 1.7388300  |
| C  | 5.5580940  | 0.5021790  | -1.1353820 |
| C  | 6.9143270  | 0.5660820  | -0.7802030 |
| C  | 7.4480760  | -0.1705910 | 0.2753910  |
| C  | 6.6290110  | -1.0146290 | 1.0306990  |
| C  | 5.2808790  | -1.1087770 | 0.7183590  |
| C  | 4.7590230  | -0.3606570 | -0.3477930 |
| N  | 3.3334660  | -0.5149480 | -0.6055670 |
| O  | 2.6890930  | -1.2832300 | 0.1401530  |
| O  | 2.8023040  | 0.0967380  | -1.5271960 |
| H  | 7.5631270  | 1.2180430  | -1.3573760 |
| H  | 8.5056110  | -0.0852960 | 0.5082170  |
| H  | 7.0356690  | -1.5929800 | 1.8540350  |
| H  | 4.6224920  | -1.7533050 | 1.2857160  |
| O  | -0.6188200 | 0.3121740  | -1.4104400 |
| O  | 0.0123850  | -1.5666020 | -0.2927320 |
| H  | 0.9816940  | -1.3180430 | -0.2328920 |
| H  | 0.7240690  | 0.0744500  | 4.2707780  |
| H  | -0.8910460 | -0.6572100 | 4.5539780  |
| H  | 0.4302510  | -1.6457300 | 3.9132900  |
| Fe | -1.1323100 | -0.2331760 | 0.1156240  |
| C  | -0.0127120 | -0.6421620 | 3.9026350  |
| C  | -4.3408010 | 4.3086470  | -0.7199570 |
| H  | -4.9546950 | 4.7337170  | 0.0830730  |
| H  | -3.8523140 | 5.1386870  | -1.2444220 |

|   |            |            |            |
|---|------------|------------|------------|
| H | -5.0049020 | 3.8036780  | -1.4262640 |
| H | -6.9727210 | -2.5054460 | -1.0764100 |
| H | -6.1890230 | -4.0205020 | -0.5971340 |
| H | -6.5273990 | -2.7755820 | 0.6182440  |
| C | -6.2119390 | -2.9390470 | -0.4157370 |
| C | 5.0808850  | 1.3374170  | -2.2963560 |
| H | 4.6485110  | 0.7211300  | -3.0907740 |
| H | 4.3040470  | 2.0475840  | -1.9952650 |
| H | 5.9232680  | 1.8983770  | -2.7108630 |

2NT-FeV-O-C1-TS-modell:

|    |            |            |            |
|----|------------|------------|------------|
| Fe | -0.6072900 | -0.7420830 | 0.4838240  |
| C  | 3.4652540  | 1.5632270  | 0.1005230  |
| C  | 3.1893140  | 2.3301100  | -1.0365430 |
| C  | 2.7252770  | 1.7265640  | -2.2175830 |
| C  | 2.5624220  | 0.3591000  | -2.2555450 |
| C  | 2.7934490  | -0.4162040 | -1.0818070 |
| C  | 3.3002250  | 0.1785210  | 0.1257230  |
| H  | 3.3498420  | 3.4037030  | -1.0059920 |
| H  | 2.5191140  | 2.3241500  | -3.0992950 |
| H  | 2.2439430  | -0.1505440 | -3.1556040 |
| O  | 0.8689130  | -0.7148620 | -0.5979970 |
| O  | -0.2117450 | -2.5170680 | -0.2149420 |
| H  | 0.6506610  | -2.8248940 | 0.1306310  |
| N  | 2.9601280  | -1.8795300 | -1.3111370 |
| O  | 2.8488800  | -2.6474470 | -0.3558470 |
| O  | 3.2150010  | -2.2352890 | -2.4580440 |
| C  | 3.6249870  | -0.5923360 | 1.3712960  |
| H  | 2.7205790  | -1.0407030 | 1.7979590  |
| H  | 4.3254060  | -1.4114420 | 1.1792930  |
| H  | 4.0665050  | 0.0787360  | 2.1128510  |
| H  | 3.8389760  | 2.0529890  | 0.9945860  |
| C  | -5.6884760 | 0.1051010  | -2.0134310 |
| H  | -6.1543410 | 0.5405380  | -1.1253620 |
| H  | -6.2504400 | -0.7975800 | -2.2825090 |
| H  | -5.7927450 | 0.8210910  | -2.8379480 |
| C  | -4.2572800 | -0.2074440 | -1.7341920 |
| N  | -3.4161830 | -0.7884100 | -2.6723510 |
| H  | -3.6778480 | -1.0564820 | -3.6145670 |
| C  | -2.1957800 | -0.9529830 | -2.1296390 |
| H  | -1.3553540 | -1.4022380 | -2.6348250 |
| N  | -2.1961530 | -0.5034410 | -0.8795610 |
| C  | -3.4750460 | -0.0382480 | -0.6216560 |
| H  | -3.7445390 | 0.3737690  | 0.3390090  |
| C  | -0.5764380 | 4.9741550  | 0.1602930  |
| H  | -0.8120780 | 4.9844090  | -0.9072920 |
| H  | 0.3795000  | 5.4927180  | 0.3028120  |
| H  | -1.3491610 | 5.5501310  | 0.6839220  |
| C  | -0.5142060 | 3.5651830  | 0.6518880  |

|   |            |            |            |
|---|------------|------------|------------|
| N | -0.2057970 | 3.2328310  | 1.9628210  |
| H | -0.0022660 | 3.8917960  | 2.7062700  |
| C | -0.2241360 | 1.8927210  | 2.0969140  |
| H | -0.0047420 | 1.3654500  | 3.0119300  |
| N | -0.5379130 | 1.3287120  | 0.9356090  |
| C | -0.7193970 | 2.3611700  | 0.0289590  |
| H | -0.9828620 | 2.1686930  | -0.9997930 |
| C | -1.2336200 | -2.2477660 | 4.1160480  |
| H | -0.5363680 | -1.8545860 | 4.8606690  |
| H | -1.0286620 | -3.3191260 | 3.9951410  |
| H | -2.2648310 | -2.1294900 | 4.4563960  |
| C | -1.0298540 | -1.5723060 | 2.7900300  |
| O | -1.9959010 | -1.3751250 | 1.9884810  |
| O | 0.1426650  | -1.2188890 | 2.4079700  |

2NT-FeV-O-C2-TS-modell1:

|   |            |            |            |
|---|------------|------------|------------|
| C | -3.7854470 | 2.5623130  | 0.3352660  |
| N | -2.5975850 | 3.2742490  | 0.4067060  |
| H | -2.5154670 | 4.2573180  | 0.6405640  |
| C | -1.5718650 | 2.4530470  | 0.1093540  |
| H | -0.5355610 | 2.7515970  | 0.0885310  |
| N | -2.0312980 | 1.2342340  | -0.1497280 |
| C | -3.4086260 | 1.2904280  | -0.0177020 |
| H | -4.0250240 | 0.4210180  | -0.1894210 |
| C | -0.7506090 | -1.4503300 | 3.3334470  |
| N | -0.2780910 | -2.6081190 | 2.7291760  |
| H | 0.0724680  | -3.4268760 | 3.2145920  |
| C | -0.3481070 | -2.4767590 | 1.3932730  |
| H | -0.0310310 | -3.2218470 | 0.6810570  |
| N | -0.8577850 | -1.2844140 | 1.0894580  |
| C | -1.1112640 | -0.6382180 | 2.2900320  |
| H | -1.5307360 | 0.3535750  | 2.3220000  |
| C | -1.8546520 | -2.4603430 | -1.8486950 |
| O | -2.5173670 | -1.4910850 | -1.3392050 |
| O | -0.5951380 | -2.4774040 | -1.6810510 |
| C | 3.9679090  | 1.4664260  | 0.2557020  |
| C | 3.5230820  | 2.7938510  | 0.0002070  |
| C | 2.5202420  | 3.0959640  | -0.9234250 |
| C | 1.9068410  | 2.0758370  | -1.6373220 |
| C | 2.2931280  | 0.7288720  | -1.4043820 |
| C | 3.3494110  | 0.4642440  | -0.4872590 |
| N | 3.7045280  | -0.9493000 | -0.3381270 |
| O | 3.3933500  | -1.7152050 | -1.2532230 |
| O | 4.2785560  | -1.3067670 | 0.6914750  |
| H | 3.9994270  | 3.5992560  | 0.5506500  |
| H | 2.2342070  | 4.1304970  | -1.0859060 |
| H | 1.1224120  | 2.2718870  | -2.3590550 |
| H | 2.0318530  | -0.0391360 | -2.1159280 |
| O | 0.7432070  | 0.1372790  | -0.2423910 |

|    |            |            |            |
|----|------------|------------|------------|
| O  | -0.5831440 | 0.1575310  | -2.4675500 |
| H  | -0.1532030 | -0.5448980 | -2.9931860 |
| H  | -1.9773980 | -4.4380340 | -2.6829540 |
| H  | -3.5674420 | -3.6685530 | -2.3582330 |
| H  | -2.5775900 | -3.1332790 | -3.7291540 |
| Fe | -0.8215640 | -0.4272920 | -0.7885250 |
| C  | -2.5414720 | -3.5027020 | -2.6967070 |
| C  | -0.7790160 | -1.2539470 | 4.8164730  |
| H  | -1.4057360 | -2.0058160 | 5.3108740  |
| H  | 0.2283210  | -1.3238380 | 5.2441650  |
| H  | -1.1822880 | -0.2657240 | 5.0519370  |
| H  | -5.1580290 | 3.5864270  | 1.6391170  |
| H  | -5.3234510 | 4.0125220  | -0.0724390 |
| H  | -5.9060610 | 2.4437520  | 0.5098820  |
| C  | -5.1119570 | 3.1873390  | 0.6184590  |
| C  | 5.0665870  | 1.2656970  | 1.2654450  |
| H  | 4.6831030  | 0.7786750  | 2.1681900  |
| H  | 5.8660880  | 0.6265590  | 0.8801960  |
| H  | 5.4925820  | 2.2328580  | 1.5463240  |

2NT-FeV-O1-C2-TS-modell1:

|   |            |            |            |
|---|------------|------------|------------|
| C | -4.5135730 | -3.8389890 | 0.6804990  |
| C | -3.5008750 | -2.8912570 | 0.1317930  |
| C | -2.5920130 | -2.0580420 | 0.7330330  |
| N | -3.3141400 | -2.6941100 | -1.2288210 |
| C | -2.3376060 | -1.7845370 | -1.4125670 |
| N | -1.8804920 | -1.3747620 | -0.2366310 |
| H | -4.4870990 | -3.8214640 | 1.7733980  |
| H | -4.3204330 | -4.8683480 | 0.3539780  |
| H | -5.5289640 | -3.5735470 | 0.3612220  |
| H | -3.8277280 | -3.1602930 | -1.9682780 |
| H | -2.4006530 | -1.9047210 | 1.7842920  |
| H | -1.9889850 | -1.4420220 | -2.3741690 |
| C | -4.4765400 | 3.7393020  | -1.2713350 |
| C | -3.4582860 | 2.9434950  | -0.5101130 |
| C | -2.4065360 | 2.1630770  | -0.9172180 |
| N | -3.4506500 | 2.8387020  | 0.8749770  |
| C | -2.4474160 | 2.0231230  | 1.2557410  |
| N | -1.7894730 | 1.5910410  | 0.1854970  |
| H | -4.2524820 | 3.6988330  | -2.3405440 |
| H | -4.4778890 | 4.7914480  | -0.9627740 |
| H | -5.4878350 | 3.3433720  | -1.1187600 |
| H | -4.0965440 | 3.3004680  | 1.5055710  |
| H | -2.0562370 | 1.9610400  | -1.9173830 |
| H | -2.2311260 | 1.7561800  | 2.2783970  |
| C | 1.4374550  | 0.5157490  | 3.5657210  |
| C | 0.7343550  | 0.4824850  | 2.2328160  |
| O | -0.3370370 | -0.2120000 | 2.0684540  |
| O | 1.2037910  | 1.0728470  | 1.2121490  |

|    |            |            |            |
|----|------------|------------|------------|
| H  | 1.9201960  | 1.4852280  | 3.7148170  |
| H  | 2.2163990  | -0.2557110 | 3.5642320  |
| H  | 0.7392720  | 0.3066500  | 4.3796280  |
| Fe | -0.3648540 | 0.0629380  | 0.0463460  |
| O  | -0.1630690 | 0.4033870  | -1.5304500 |
| O  | 0.9150610  | -1.5539450 | -0.0479890 |
| H  | 1.4548410  | -1.6227890 | 0.7702210  |
| C  | 2.8632830  | -1.5220040 | -1.0863520 |
| N  | 3.8573960  | -0.5749840 | 0.9251240  |
| O  | 3.2549800  | -1.4500250 | 1.5762100  |
| C  | 3.4698360  | -0.3966360 | -0.4686000 |
| O  | 4.7488280  | 0.1191490  | 1.3984110  |
| C  | 3.6413280  | 0.8243760  | -1.1226360 |
| C  | 3.2015750  | 0.8666170  | -2.4691740 |
| C  | 2.6392080  | -0.2359220 | -3.1202520 |
| C  | 2.4766300  | -1.4341860 | -2.4418600 |
| C  | 4.2092840  | 2.0703370  | -0.5003760 |
| H  | 3.3089190  | 1.8038470  | -3.0071730 |
| H  | 2.3383810  | -0.1475910 | -4.1593090 |
| H  | 2.0608110  | -2.3086810 | -2.9301630 |
| H  | 2.9531080  | -2.4930620 | -0.6188160 |
| H  | 4.0181450  | 2.9275030  | -1.1513280 |
| H  | 3.7619490  | 2.2654040  | 0.4786590  |
| H  | 5.2905790  | 1.9834410  | -0.3507020 |

**Fe<sup>III</sup>-OOH and HO-Fe<sup>V</sup>=O attacks Model 2**

***Nitrobenzene Model 2***

NBZ-FeIII-RC-model2:

|   |             |             |             |
|---|-------------|-------------|-------------|
| C | -2.12962700 | -1.26313600 | 4.32162200  |
| N | -2.73799400 | -1.05846200 | 3.09057400  |
| H | -3.73246200 | -1.13470400 | 2.90612800  |
| C | -1.80126300 | -0.75898800 | 2.17516000  |
| H | -1.99977400 | -0.55994500 | 1.13368100  |
| N | -0.60081800 | -0.75564500 | 2.75175500  |
| C | -0.79432600 | -1.07308700 | 4.08744700  |
| H | 0.03314200  | -1.14959600 | 4.77629800  |
| C | 1.29899000  | 3.54574000  | 3.54124000  |
| N | 2.55007900  | 3.44462900  | 2.94852500  |
| H | 3.26126200  | 4.16823400  | 2.94814200  |
| C | 2.67767000  | 2.23831500  | 2.37549400  |
| H | 3.55331400  | 1.89202000  | 1.84895500  |
| N | 1.55982200  | 1.53635900  | 2.56468600  |
| C | 0.69420000  | 2.34452800  | 3.28896400  |
| H | -0.28718300 | 2.00661400  | 3.58296100  |
| C | -0.36525000 | 5.89828200  | -2.99099000 |
| H | -1.19820500 | 5.64100600  | -2.32224400 |
| H | -0.40918500 | 5.17146100  | -3.81323800 |

|    |             |             |             |
|----|-------------|-------------|-------------|
| C  | 0.93942600  | 5.68123600  | -2.22297400 |
| O  | 1.72324700  | 6.59285100  | -1.96460000 |
| N  | 1.15563600  | 4.39773300  | -1.81936500 |
| H  | 2.04632400  | 4.17969400  | -1.39155200 |
| H  | 0.57990500  | 3.62234600  | -2.13167000 |
| C  | 3.25770300  | -1.56287700 | 2.46492900  |
| O  | 2.14521200  | -1.78263500 | 3.04614500  |
| O  | 3.25758800  | -0.70584900 | 1.51124700  |
| C  | -3.31140000 | 0.24704900  | -2.17133400 |
| C  | -4.07572900 | -0.84156800 | -2.58404200 |
| C  | -3.59716900 | -1.69896900 | -3.58052900 |
| C  | -2.35173300 | -1.46945800 | -4.17403700 |
| C  | -1.57554900 | -0.38271500 | -3.77748800 |
| C  | -2.07001900 | 0.45586600  | -2.77680400 |
| N  | -1.26546900 | 1.59891200  | -2.34911500 |
| O  | -0.21798500 | 1.83574600  | -2.96412500 |
| O  | -1.66624000 | 2.28043400  | -1.40513600 |
| H  | -3.66388000 | 0.92938800  | -1.40752100 |
| H  | -5.04645700 | -1.01754800 | -2.13083300 |
| H  | -4.19796200 | -2.54662500 | -3.89694700 |
| H  | -1.98423600 | -2.13594300 | -4.94798600 |
| H  | -0.60987200 | -0.18437600 | -4.22554000 |
| O  | 0.64602700  | -0.32959200 | 0.04325400  |
| O  | 0.89981800  | -1.75781100 | 0.00836600  |
| H  | 1.76859100  | -1.79387200 | -0.44643400 |
| H  | 5.18024400  | -1.52761900 | 3.36738000  |
| H  | 4.30002500  | -3.06540600 | 3.58578300  |
| H  | 5.03902000  | -2.64484200 | 2.00704100  |
| Fe | 1.20599400  | -0.34766400 | 1.83333400  |
| C  | 4.51604300  | -2.25594700 | 2.88654000  |
| C  | 0.84391200  | 4.75725100  | 4.27997400  |
| H  | 1.50261100  | 4.97763500  | 5.12881500  |
| H  | 0.82765200  | 5.64115600  | 3.63121800  |
| H  | -0.16686700 | 4.60038400  | 4.66532900  |
| C  | -0.52137000 | 7.32214800  | -3.52064200 |
| H  | -3.61315100 | -0.83263400 | 5.81809100  |
| H  | -3.43748300 | -2.55353100 | 5.43773400  |
| H  | -2.19569400 | -1.72769300 | 6.39521600  |
| H  | -0.49338200 | 8.05234800  | -2.70563400 |
| H  | 0.28321800  | 7.57653300  | -4.21857700 |
| H  | -1.47625600 | 7.43164100  | -4.04710400 |
| C  | -2.88737100 | -1.61223800 | 5.55663900  |

NBZ-RC-FeV-model2:

|   |             |             |             |
|---|-------------|-------------|-------------|
| C | -0.00224100 | 0.00653000  | -0.00289400 |
| N | -0.00250000 | -0.09991700 | 1.38070600  |
| H | 0.82263700  | -0.18891300 | 1.96385300  |
| C | -1.26929500 | -0.08003300 | 1.82900700  |
| H | -1.55079500 | -0.14808400 | 2.86831100  |

|    |             |             |             |
|----|-------------|-------------|-------------|
| N  | -2.10565800 | 0.03646600  | 0.79985200  |
| C  | -1.32793100 | 0.08616600  | -0.34679900 |
| H  | -1.77194300 | 0.17318800  | -1.32674600 |
| C  | -3.98377800 | 4.23915100  | 0.91163900  |
| N  | -5.34609800 | 4.01951400  | 0.75332600  |
| H  | -6.05778900 | 4.74183600  | 0.71520200  |
| C  | -5.58509300 | 2.70312000  | 0.66668900  |
| H  | -6.55836900 | 2.25265100  | 0.55772600  |
| N  | -4.42732100 | 2.04274900  | 0.74573000  |
| C  | -3.42496400 | 2.98935100  | 0.90632500  |
| H  | -2.38840600 | 2.71041500  | 0.99944000  |
| C  | -6.07182800 | 3.37313000  | 8.47402900  |
| H  | -5.63780400 | 2.60459200  | 9.12523800  |
| H  | -7.15804200 | 3.20272600  | 8.48839700  |
| C  | -5.59784500 | 3.14776800  | 7.03691900  |
| O  | -5.36718400 | 4.07313900  | 6.25859400  |
| N  | -5.46001800 | 1.84190800  | 6.68231100  |
| H  | -5.25083900 | 1.62372300  | 5.71624100  |
| H  | -5.73495400 | 1.07755500  | 7.29051200  |
| C  | -5.72313500 | -0.54856000 | -0.90286200 |
| O  | -4.43678800 | -0.41164800 | -0.93510700 |
| O  | -6.31291200 | -0.22618300 | 0.16603800  |
| C  | -7.14489100 | -2.73319800 | 9.85002100  |
| C  | -7.48409900 | -3.95134400 | 10.43355400 |
| C  | -7.21198000 | -5.15083100 | 9.76742100  |
| C  | -6.59705800 | -5.14049100 | 8.51100700  |
| C  | -6.25022800 | -3.93240700 | 7.91174800  |
| C  | -6.53052100 | -2.74701300 | 8.59554400  |
| N  | -6.16718900 | -1.47696100 | 7.97214800  |
| O  | -5.62574800 | -1.49435500 | 6.86592700  |
| O  | -6.42174100 | -0.43210700 | 8.58642300  |
| H  | -7.34667700 | -1.79316000 | 10.34852300 |
| H  | -7.96130600 | -3.96337300 | 11.40840700 |
| H  | -7.47919400 | -6.09666100 | 10.22968300 |
| H  | -6.38760900 | -6.07324700 | 7.99661400  |
| H  | -5.77269700 | -3.89909500 | 6.94030800  |
| O  | -4.30546500 | 0.37036000  | 2.64588800  |
| O  | -4.37845000 | -1.65650700 | 1.61525900  |
| H  | -5.26955700 | -1.79802800 | 1.99960700  |
| H  | -7.51592200 | -0.92199600 | -2.01660000 |
| H  | -6.03526000 | -0.74475200 | -3.01841800 |
| H  | -6.29590000 | -2.22051200 | -2.07588600 |
| Fe | -4.21569800 | 0.04588700  | 0.97307100  |
| C  | -6.44723200 | -1.13389100 | -2.08313800 |
| C  | -3.38653500 | 5.60065900  | 1.06156500  |
| H  | -3.60381400 | 6.23254300  | 0.19226500  |
| H  | -3.77741900 | 6.10727900  | 1.95193100  |
| H  | -2.30152500 | 5.51968600  | 1.16408600  |
| C  | -5.75653100 | 4.77319000  | 8.99823400  |
| H  | 1.89077800  | 0.88092400  | -0.53413800 |

|   |             |             |             |
|---|-------------|-------------|-------------|
| H | 1.84482700  | -0.88687500 | -0.64909600 |
| H | 1.02293200  | 0.10121200  | -1.86902700 |
| H | -6.18536300 | 5.53904200  | 8.34506700  |
| H | -6.16602100 | 4.90825200  | 10.00543500 |
| H | -4.67539000 | 4.94645400  | 9.04603300  |
| C | 1.25805800  | 0.02659300  | -0.80399600 |

NBZ-FeIII-O-C1-TS-model2:

|   |              |             |             |
|---|--------------|-------------|-------------|
| C | -31.18661100 | 11.06679200 | 7.89610900  |
| N | -31.79487400 | 11.12003100 | 6.65211500  |
| H | -32.78065000 | 10.96758200 | 6.47093800  |
| C | -30.86372000 | 11.40934800 | 5.71849500  |
| H | -31.07725300 | 11.50766500 | 4.66503900  |
| N | -29.67406000 | 11.54934200 | 6.29003900  |
| C | -29.86720800 | 11.33750100 | 7.64618000  |
| H | -29.04807700 | 11.38608400 | 8.34907300  |
| C | -27.74306700 | 15.89993300 | 7.30984700  |
| N | -26.40526700 | 15.71374200 | 6.99767700  |
| H | -25.65573200 | 16.36261700 | 7.21075500  |
| C | -26.25668600 | 14.53351000 | 6.36824900  |
| H | -25.31803700 | 14.12843700 | 6.02427600  |
| N | -27.43825400 | 13.93549400 | 6.25058400  |
| C | -28.37153300 | 14.78098800 | 6.83042300  |
| H | -29.41883300 | 14.52250900 | 6.87639100  |
| C | -29.44450900 | 18.31017200 | 0.76126700  |
| H | -30.31863900 | 17.75537500 | 0.39028300  |
| H | -28.56355000 | 17.76678800 | 0.39739700  |
| C | -29.48644300 | 18.24770100 | 2.28854400  |
| O | -29.90320500 | 19.17389300 | 2.98151200  |
| N | -29.03290600 | 17.08232800 | 2.82974800  |
| H | -29.14773900 | 16.94186500 | 3.82560100  |
| H | -28.78019700 | 16.27597200 | 2.26994200  |
| C | -25.60582400 | 10.69151800 | 5.95361300  |
| O | -26.80683100 | 10.30390300 | 6.23207800  |
| O | -25.43255900 | 11.76573800 | 5.32211300  |
| C | -29.30139000 | 11.24441600 | 0.82126800  |
| C | -29.13147400 | 10.25079900 | -0.11806500 |
| C | -27.96737500 | 10.20327400 | -0.91162400 |
| C | -26.96937100 | 11.19007500 | -0.77262300 |
| C | -27.10426300 | 12.19909000 | 0.15359500  |
| C | -28.22902500 | 12.17651400 | 1.05683500  |
| N | -28.63822300 | 13.50124900 | 1.63722200  |
| O | -27.90613000 | 14.46785000 | 1.42292800  |
| O | -29.66721800 | 13.54138400 | 2.30274600  |
| H | -30.20536600 | 11.32553900 | 1.41087500  |
| H | -29.91708600 | 9.51713100  | -0.26938500 |
| H | -27.85274600 | 9.42110500  | -1.65528000 |
| H | -26.09815400 | 11.17194400 | -1.41970200 |
| H | -26.36332400 | 12.98127100 | 0.25955000  |



|    |              |             |             |
|----|--------------|-------------|-------------|
| O  | -27.38291700 | 11.63836400 | 2.55264400  |
| O  | -28.31661800 | 11.18109300 | 3.53882500  |
| H  | -28.25717300 | 10.20518300 | 3.46648900  |
| H  | -23.50280600 | 10.23843500 | 6.07306000  |
| H  | -24.45272200 | 9.83666600  | 7.53147000  |
| H  | -24.58449100 | 8.81291600  | 6.10102300  |
| Fe | -27.72001400 | 11.98203300 | 5.55606300  |
| C  | -24.45601300 | 9.84800200  | 6.43499700  |
| C  | -28.24600000 | 17.09400900 | 8.04400600  |
| H  | -27.77577400 | 17.18444400 | 9.03096000  |
| H  | -28.04627600 | 18.02222100 | 7.49463200  |
| H  | -29.32653100 | 17.01457000 | 8.19049500  |
| C  | -29.46900000 | 19.74098900 | 0.22200200  |
| H  | -32.71056900 | 11.49095500 | 9.35841900  |
| H  | -32.37672200 | 9.76741000  | 9.13259200  |
| H  | -31.21711400 | 10.78591400 | 10.00234400 |
| H  | -28.57714400 | 20.29790500 | 0.53101000  |
| H  | -29.50422100 | 19.73853500 | -0.87313400 |
| H  | -30.34337800 | 20.28128800 | 0.59624800  |
| C  | -31.91499200 | 10.76200000 | 9.16099200  |

NBZ-FeIII-O-C2-TS-model2:

|   |              |             |             |
|---|--------------|-------------|-------------|
| C | -31.18389500 | 11.06320600 | 7.89720800  |
| N | -31.78819600 | 11.10298500 | 6.65089200  |
| H | -32.77219100 | 10.94147100 | 6.46801300  |
| C | -30.85542200 | 11.39136800 | 5.71852700  |
| H | -31.06420900 | 11.47701400 | 4.66309200  |
| N | -29.66889600 | 11.54299900 | 6.29314400  |
| C | -29.86533100 | 11.34074400 | 7.65008600  |
| H | -29.04886200 | 11.40055300 | 8.35520000  |
| C | -27.74312100 | 15.89764500 | 7.31381900  |
| N | -26.40735900 | 15.71823200 | 6.98905800  |
| H | -25.65904000 | 16.37053200 | 7.19587500  |
| C | -26.25870000 | 14.53861000 | 6.35885500  |
| H | -25.32119100 | 14.13681500 | 6.00822500  |
| N | -27.43857200 | 13.93468000 | 6.25230500  |
| C | -28.37016100 | 14.77536700 | 6.84171700  |
| H | -29.41622700 | 14.51341900 | 6.89485300  |
| C | -28.63881000 | 18.47166800 | 0.40929500  |
| H | -29.27652200 | 17.60984400 | 0.64110500  |
| H | -28.11986100 | 18.22256600 | -0.52785300 |
| C | -27.56507400 | 18.61577600 | 1.48795400  |
| O | -27.11975200 | 19.70545100 | 1.84407600  |
| N | -27.12541700 | 17.44068400 | 2.01724200  |
| H | -26.33051200 | 17.46661200 | 2.64294500  |
| H | -27.43252200 | 16.53523700 | 1.67861300  |
| C | -25.60108400 | 10.69401700 | 5.94920400  |
| O | -26.80556800 | 10.30134400 | 6.20958500  |
| O | -25.42112700 | 11.77528200 | 5.33363700  |

|    |              |             |             |
|----|--------------|-------------|-------------|
| C  | -30.45352200 | 12.33258300 | 1.14642500  |
| C  | -30.75710900 | 10.98063600 | 0.91531100  |
| C  | -29.73671900 | 10.05816100 | 0.61047300  |
| C  | -28.41661100 | 10.46570200 | 0.56414200  |
| C  | -28.05640100 | 11.80961800 | 0.91500200  |
| C  | -29.13345800 | 12.73734500 | 1.09545500  |
| N  | -28.80721700 | 14.13775500 | 1.30103400  |
| O  | -27.61576500 | 14.46796800 | 1.22371300  |
| O  | -29.72245100 | 14.92828400 | 1.53946200  |
| H  | -31.23784500 | 13.05518100 | 1.33723100  |
| H  | -31.79238300 | 10.65674900 | 0.94410600  |
| H  | -29.99609300 | 9.02800800  | 0.38632200  |
| H  | -27.62383000 | 9.77003800  | 0.31015100  |
| H  | -27.09715100 | 12.19850900 | 0.59229300  |
| O  | -27.34686200 | 11.59910500 | 2.63539200  |
| O  | -28.33647400 | 11.13101300 | 3.53820600  |
| H  | -28.21816900 | 10.15692900 | 3.53014200  |
| H  | -23.50068200 | 10.23529800 | 6.07532100  |
| H  | -24.45538400 | 9.83978800  | 7.53162100  |
| H  | -24.58613100 | 8.81225600  | 6.10391500  |
| Fe | -27.71820300 | 11.98496000 | 5.55794300  |
| C  | -24.45600500 | 9.84800300  | 6.43499900  |
| C  | -28.24600000 | 17.09400100 | 8.04400100  |
| H  | -27.76097700 | 17.19998900 | 9.02221200  |
| H  | -28.06438900 | 18.01790200 | 7.48119700  |
| H  | -29.32325000 | 17.00547700 | 8.20847600  |
| C  | -29.46900000 | 19.74099700 | 0.22200100  |
| H  | -32.71876600 | 11.48451200 | 9.34861900  |
| H  | -32.36636500 | 9.76248800  | 9.13911500  |
| H  | -31.22147000 | 10.80007500 | 10.00541100 |
| H  | -30.17704800 | 19.61999500 | -0.60544700 |
| H  | -30.04227600 | 19.97896600 | 1.12539700  |
| H  | -28.82428200 | 20.59727200 | 0.00350200  |
| C  | -31.91499900 | 10.76200000 | 9.16099800  |

NBZ-FeV-O-C1-TS-model2:

|   |              |             |            |
|---|--------------|-------------|------------|
| C | -31.10562500 | 11.14635800 | 7.96530200 |
| N | -31.63104300 | 11.15018400 | 6.68357300 |
| H | -32.58676100 | 10.91705800 | 6.43868600 |
| C | -30.66673700 | 11.50900000 | 5.81176600 |
| H | -30.80970900 | 11.57528900 | 4.74503200 |
| N | -29.53597500 | 11.75018200 | 6.46150800 |
| C | -29.79532600 | 11.52585800 | 7.80349500 |
| H | -29.02964400 | 11.64861500 | 8.55522700 |
| C | -27.70431600 | 15.78479900 | 7.55619100 |
| N | -26.35173700 | 15.46833100 | 7.59191700 |
| H | -25.61659300 | 16.06383900 | 7.95731400 |
| C | -26.16145400 | 14.24769200 | 7.06362000 |
| H | -25.20220000 | 13.77254900 | 6.93878100 |

|    |              |             |             |
|----|--------------|-------------|-------------|
| N  | -27.33249500 | 13.73397600 | 6.69183000  |
| C  | -28.29944600 | 14.68628600 | 6.99245800  |
| H  | -29.34216300 | 14.51899900 | 6.77505700  |
| C  | -28.38048800 | 18.79277600 | 0.72173100  |
| H  | -28.81730100 | 17.88247700 | 1.14917000  |
| H  | -27.75428600 | 18.46658800 | -0.12154600 |
| C  | -27.44777500 | 19.44542400 | 1.74151300  |
| O  | -27.25186400 | 20.65839600 | 1.78195400  |
| N  | -26.83725200 | 18.57864100 | 2.59682200  |
| H  | -26.11355300 | 18.93799000 | 3.20634100  |
| H  | -26.93153000 | 17.57302100 | 2.51149600  |
| C  | -25.52268000 | 10.86850200 | 6.12168700  |
| O  | -26.71778600 | 10.69701100 | 6.58990900  |
| O  | -25.31696700 | 11.85761800 | 5.37273600  |
| C  | -29.18278200 | 12.83069700 | 1.92171600  |
| C  | -29.20628900 | 11.53582100 | 1.45452800  |
| C  | -27.99974800 | 10.83703700 | 1.24787600  |
| C  | -26.75389500 | 11.45506000 | 1.47279900  |
| C  | -26.69830700 | 12.74827900 | 1.94136600  |
| C  | -27.92218300 | 13.41463700 | 2.24867700  |
| N  | -27.87911200 | 14.89995700 | 2.37856500  |
| O  | -26.77028000 | 15.43478400 | 2.38847800  |
| O  | -28.94457700 | 15.49813200 | 2.46103600  |
| H  | -30.08592500 | 13.40936700 | 2.06799600  |
| H  | -30.15352200 | 11.05663000 | 1.22970300  |
| H  | -28.03063400 | 9.81812900  | 0.87430900  |
| H  | -25.83602300 | 10.91428600 | 1.26756800  |
| H  | -25.75977800 | 13.26012100 | 2.11032900  |
| O  | -27.97455800 | 13.30996000 | 4.21153400  |
| O  | -27.92711100 | 10.78193200 | 4.29484300  |
| H  | -27.79033400 | 9.96401200  | 4.81303500  |
| H  | -23.47097000 | 10.22588100 | 6.15490300  |
| H  | -24.47533100 | 9.58707000  | 7.49741200  |
| H  | -24.66800900 | 8.93563000  | 5.86452100  |
| Fe | -27.61772300 | 12.11714600 | 5.44991500  |
| C  | -24.45600800 | 9.84800600  | 6.43499900  |
| C  | -28.24600000 | 17.09400200 | 8.04400100  |
| H  | -28.04327000 | 17.23971300 | 9.11184300  |
| H  | -27.79970900 | 17.93411400 | 7.49892700  |
| H  | -29.32811800 | 17.12645500 | 7.89322800  |
| C  | -29.46899900 | 19.74099300 | 0.22200300  |
| H  | -32.78271200 | 11.42022300 | 9.29052000  |
| H  | -32.28593000 | 9.73303200  | 9.07855100  |
| H  | -31.30289400 | 10.82833500 | 10.06449100 |
| H  | -30.06719300 | 19.26284000 | -0.56173900 |
| H  | -30.14576600 | 20.03245700 | 1.03352300  |
| H  | -29.02921200 | 20.65514800 | -0.18731000 |
| C  | -31.91499500 | 10.76200000 | 9.16099400  |

NBZ-FeV-O-C2-TS-model2:

|    |             |             |             |
|----|-------------|-------------|-------------|
| C  | -2.12056000 | -1.14415300 | 4.36558900  |
| N  | -2.74166300 | -0.58995700 | 3.25701200  |
| H  | -3.74115900 | -0.45926500 | 3.14759300  |
| C  | -1.80679500 | -0.25425500 | 2.34822200  |
| H  | -2.01752200 | 0.19995000  | 1.39292200  |
| N  | -0.59955200 | -0.56115400 | 2.81100400  |
| C  | -0.78165800 | -1.12067700 | 4.06439100  |
| H  | 0.05488200  | -1.46600800 | 4.65266400  |
| C  | 1.33013000  | 3.52261700  | 3.58329500  |
| N  | 2.59905700  | 3.41667300  | 3.02751900  |
| H  | 3.31428100  | 4.13563500  | 3.04822300  |
| C  | 2.74342700  | 2.20550200  | 2.46445200  |
| H  | 3.62933400  | 1.86216200  | 1.95441200  |
| N  | 1.62449300  | 1.50092200  | 2.63074300  |
| C  | 0.73814500  | 2.31312300  | 3.32421400  |
| H  | -0.25063600 | 1.97774400  | 3.59021400  |
| C  | 0.76559700  | 6.63229600  | -3.98169500 |
| H  | 0.63434400  | 5.54620500  | -4.01121600 |
| H  | 1.00393200  | 6.95044400  | -5.00587500 |
| C  | 1.96543300  | 7.01310700  | -3.11521200 |
| O  | 2.19458300  | 8.17828500  | -2.79445400 |
| N  | 2.78006000  | 5.98247200  | -2.75829900 |
| H  | 3.57504900  | 6.18384800  | -2.16474400 |
| H  | 2.51881300  | 5.01292800  | -2.89549200 |
| C  | 3.38079500  | -1.34314300 | 2.49042200  |
| O  | 2.29154300  | -1.32360200 | 3.16485400  |
| O  | 3.44251400  | -0.63883400 | 1.43552600  |
| C  | -1.08271000 | 2.04469400  | -2.36482700 |
| C  | -2.24129400 | 1.27925200  | -2.13361100 |
| C  | -2.14631600 | -0.01930700 | -1.61690000 |
| C  | -0.90530300 | -0.55628300 | -1.29807700 |
| C  | 0.28343400  | 0.21481200  | -1.45969600 |
| C  | 0.14764200  | 1.49873300  | -2.05961000 |
| N  | 1.35639700  | 2.27014400  | -2.31935500 |
| O  | 2.43315800  | 1.81127700  | -1.94520500 |
| O  | 1.22880600  | 3.35184700  | -2.90706300 |
| H  | -1.15057600 | 3.03858600  | -2.78917700 |
| H  | -3.21078800 | 1.70330400  | -2.37427900 |
| H  | -3.04554900 | -0.61009100 | -1.47329100 |
| H  | -0.81331000 | -1.55519200 | -0.88935700 |
| H  | 1.24904500  | -0.26912300 | -1.47988100 |
| O  | 0.60847700  | 0.74086200  | 0.44067900  |
| O  | 1.07386800  | -1.79582100 | 0.73466500  |
| H  | 1.89413100  | -1.92517200 | 0.21945600  |
| H  | 5.47247200  | -1.83514700 | 2.56767700  |
| H  | 4.51660100  | -2.43777300 | 3.96390100  |
| H  | 4.37248800  | -3.21586200 | 2.37477400  |
| Fe | 1.22530500  | -0.30243100 | 1.71511900  |
| C  | 4.51604500  | -2.25594700 | 2.88653900  |

|   |             |             |             |
|---|-------------|-------------|-------------|
| C | 0.84391200  | 4.75725200  | 4.27997400  |
| H | 1.47680400  | 5.00600100  | 5.14020500  |
| H | 0.84188600  | 5.62025800  | 3.60363100  |
| H | -0.17646500 | 4.60286100  | 4.64006200  |
| C | -0.52137000 | 7.32215000  | -3.52064200 |
| H | -3.45405300 | -0.79353900 | 6.01673300  |
| H | -3.59902300 | -2.40324900 | 5.29035200  |
| H | -2.20188500 | -2.01376600 | 6.30775300  |
| H | -0.82441600 | 6.97664300  | -2.52453800 |
| H | -0.37647500 | 8.40549100  | -3.47062700 |
| H | -1.34367100 | 7.11460800  | -4.21448700 |
| C | -2.88737300 | -1.61223800 | 5.55664100  |

NBZ-FeV-O1-C2-TS-model2:

|    |              |             |             |
|----|--------------|-------------|-------------|
| C  | -31.10569600 | 11.16609500 | 7.97271200  |
| N  | -31.66653700 | 11.78066900 | 6.86217500  |
| H  | -32.65023700 | 11.99582400 | 6.74319200  |
| C  | -30.69555800 | 12.05849400 | 5.97243000  |
| H  | -30.85254800 | 12.55486700 | 5.02778000  |
| N  | -29.52264100 | 11.65142800 | 6.44563900  |
| C  | -29.76540200 | 11.08840400 | 7.68674300  |
| H  | -28.96543900 | 10.67742000 | 8.28400900  |
| C  | -27.75139200 | 15.72193900 | 7.70753000  |
| N  | -26.90436700 | 14.98027900 | 8.52177000  |
| H  | -26.50324200 | 15.29348100 | 9.39904000  |
| C  | -26.67644800 | 13.78031400 | 7.95339200  |
| H  | -26.05789600 | 13.00712300 | 8.38204000  |
| N  | -27.33546800 | 13.70038400 | 6.80173300  |
| C  | -28.00002900 | 14.90595300 | 6.63686300  |
| H  | -28.60675000 | 15.09393700 | 5.76561700  |
| C  | -29.14572700 | 18.24921000 | 0.32215100  |
| H  | -30.05038800 | 17.66643600 | 0.54013300  |
| H  | -28.77406700 | 17.87642800 | -0.64298800 |
| C  | -28.08531000 | 17.93213300 | 1.37848800  |
| O  | -27.41586200 | 18.80255600 | 1.93086600  |
| N  | -27.93768500 | 16.60822100 | 1.67133900  |
| H  | -27.16698900 | 16.32875400 | 2.26492500  |
| H  | -28.39053800 | 15.87048800 | 1.14695000  |
| C  | -25.56172700 | 10.83136900 | 6.11543500  |
| O  | -26.68940200 | 10.76058900 | 6.74012500  |
| O  | -25.44985200 | 11.69526000 | 5.20071900  |
| H  | -23.49362500 | 10.22875300 | 6.08653800  |
| H  | -24.42087300 | 9.64611800  | 7.50912100  |
| H  | -24.66668000 | 8.90058500  | 5.92337100  |
| Fe | -27.65474100 | 12.09881500 | 5.54853300  |
| C  | -24.45600400 | 9.84800300  | 6.43500000  |
| C  | -28.24600000 | 17.09400100 | 8.04400000  |
| H  | -28.81301400 | 17.09602200 | 8.98272700  |
| H  | -27.41942300 | 17.80704100 | 8.15008100  |

|   |              |             |             |
|---|--------------|-------------|-------------|
| H | -28.90243600 | 17.45248300 | 7.24696600  |
| C | -29.46900000 | 19.74099900 | 0.22200000  |
| H | -32.39703200 | 11.62883600 | 9.62955800  |
| H | -32.70339900 | 10.04971300 | 8.88894400  |
| H | -31.27215200 | 10.28711400 | 9.90699500  |
| H | -30.19683400 | 19.92145000 | -0.57695400 |
| H | -29.89075100 | 20.12021600 | 1.15914600  |
| H | -28.56816800 | 20.32316800 | 0.00595700  |
| C | -31.91499900 | 10.76200000 | 9.16099800  |
| C | -26.75971300 | 10.75710800 | 2.47184000  |
| C | -26.61606600 | 9.34749600  | 2.29893800  |
| C | -27.44222100 | 8.65657500  | 1.42380600  |
| C | -28.39495900 | 9.35150000  | 0.66692000  |
| C | -28.49898900 | 10.75639600 | 0.74775900  |
| C | -27.66341200 | 11.43487000 | 1.60690400  |
| N | -27.66728900 | 12.90072100 | 1.59505100  |
| O | -28.64458300 | 13.46792700 | 1.09968100  |
| O | -26.67911000 | 13.47624200 | 2.04332500  |
| H | -26.01368900 | 11.32008300 | 3.01736500  |
| H | -25.87025100 | 8.82585400  | 2.89062800  |
| H | -27.34535400 | 7.58127800  | 1.31565100  |
| H | -29.04630500 | 8.81457500  | -0.01511100 |
| H | -29.19674100 | 11.29678000 | 0.11932100  |
| O | -28.28519700 | 13.11145700 | 4.44404900  |
| O | -27.93878800 | 10.55958300 | 4.22092600  |
| H | -27.54808900 | 9.75448000  | 4.61828600  |

**Fe<sup>III</sup>-OOH and HO-Fe<sup>V</sup>=O attacks Model 3**

***Nitrobenzene Model 3***

NBZ-FeIII-RC-model3:

|   |             |             |            |
|---|-------------|-------------|------------|
| C | -2.12518600 | -1.23741800 | 4.33091300 |
| N | -2.74039400 | -0.92144500 | 3.12755000 |
| H | -3.74048900 | -0.92278100 | 2.95917400 |
| C | -1.80105400 | -0.62366300 | 2.21291100 |
| H | -2.00300000 | -0.34392400 | 1.19068700 |
| N | -0.59332100 | -0.72792500 | 2.76250200 |
| C | -0.78398400 | -1.11426100 | 4.08001200 |
| H | 0.04899400  | -1.28294800 | 4.74538900 |
| C | 1.30527100  | 3.53579000  | 3.56477400 |
| N | 2.59759200  | 3.38654900  | 3.08348600 |
| H | 3.33534600  | 4.07891200  | 3.15408100 |
| C | 2.72221800  | 2.17861900  | 2.51046400 |
| H | 3.62404200  | 1.79495400  | 2.06050100 |
| N | 1.56480000  | 1.52449400  | 2.59255100 |
| C | 0.67439100  | 2.36414500  | 3.24483100 |

|    |             |             |             |
|----|-------------|-------------|-------------|
| H  | -0.34471600 | 2.06978200  | 3.44239700  |
| C  | 0.07272500  | 5.91914700  | -3.63701700 |
| H  | -0.42665800 | 5.36064100  | -4.44144300 |
| H  | 1.13253400  | 5.96576900  | -3.92007500 |
| C  | -0.05804900 | 5.09764200  | -2.35318900 |
| O  | -0.73218800 | 5.46312800  | -1.39167400 |
| N  | 0.63611400  | 3.92500000  | -2.35188300 |
| H  | 0.49245700  | 3.28510000  | -1.58102700 |
| H  | 1.10474000  | 3.56343500  | -3.17498200 |
| C  | 3.24831600  | -1.59410200 | 2.43633800  |
| O  | 2.10940200  | -1.95585400 | 2.87199800  |
| O  | 3.27862300  | -0.62075800 | 1.60233500  |
| C  | 3.40642800  | 1.07570500  | -6.68958100 |
| C  | 3.87579600  | 0.22982800  | -7.69072900 |
| C  | 3.51414600  | -1.12144500 | -7.69719000 |
| C  | 2.68096700  | -1.63861700 | -6.69923200 |
| C  | 2.21261400  | -0.81193200 | -5.68195300 |
| C  | 2.58806600  | 0.53456100  | -5.69450400 |
| N  | 2.09578200  | 1.41198400  | -4.64236100 |
| O  | 1.61811200  | 0.90741600  | -3.61412400 |
| O  | 2.16100200  | 2.63046500  | -4.81637100 |
| H  | 3.67177000  | 2.12554200  | -6.66618800 |
| H  | 4.52260500  | 0.62648300  | -8.46673700 |
| H  | 3.87908700  | -1.77331000 | -8.48533000 |
| H  | 2.39114800  | -2.68440000 | -6.71668000 |
| H  | 1.55001600  | -1.19020100 | -4.91289300 |
| O  | 0.51568000  | -0.07198100 | 0.07377800  |
| O  | 0.77808900  | -1.48800900 | -0.10065000 |
| H  | 1.52645800  | -1.46048400 | -0.78091900 |
| H  | 5.15679000  | -1.51604100 | 3.37949000  |
| H  | 4.30577500  | -3.07765000 | 3.57312200  |
| H  | 5.06269000  | -2.63117400 | 2.01448600  |
| Fe | 1.21203500  | -0.35945300 | 1.78941100  |
| C  | 4.51604600  | -2.25594800 | 2.88653900  |
| C  | 0.84391200  | 4.75725200  | 4.27997300  |
| H  | 1.40940000  | 4.91611800  | 5.20656800  |
| H  | 0.95964500  | 5.65476600  | 3.66065800  |
| H  | -0.21333500 | 4.66019500  | 4.54031500  |
| C  | -0.52137000 | 7.32215000  | -3.52064300 |
| H  | -3.57070400 | -0.81216000 | 5.86623900  |
| H  | -3.48488200 | -2.51805700 | 5.39731900  |
| H  | -2.19488700 | -1.80475100 | 6.38038800  |
| H  | -0.42831400 | 7.85601600  | -4.47310100 |
| H  | -1.58148800 | 7.27925800  | -3.25222900 |
| H  | -0.00918700 | 7.90861000  | -2.75025700 |
| C  | -2.88737300 | -1.61223800 | 5.55664100  |
| O  | 2.61954400  | -1.29265800 | -1.98985300 |
| H  | 2.64686600  | -2.07717300 | -2.56358600 |
| H  | 2.32029900  | -0.56211200 | -2.56744900 |

NBZ-FeV-RC-model3:

|    |             |             |             |
|----|-------------|-------------|-------------|
| C  | -2.10492700 | -1.16622400 | 4.36462700  |
| N  | -2.71409800 | -0.68033900 | 3.21760400  |
| H  | -3.71409000 | -0.59097100 | 3.07546400  |
| C  | -1.76820500 | -0.34508100 | 2.32032000  |
| H  | -1.97148300 | 0.06599000  | 1.34386900  |
| N  | -0.56367700 | -0.58743600 | 2.82705200  |
| C  | -0.75985800 | -1.10477700 | 4.09693900  |
| H  | 0.07130700  | -1.39480800 | 4.72176400  |
| C  | 1.36917500  | 3.51108700  | 3.64612200  |
| N  | 2.68421400  | 3.36404000  | 3.22676000  |
| H  | 3.41412700  | 4.06269100  | 3.31704900  |
| C  | 2.84785900  | 2.15026900  | 2.67625500  |
| H  | 3.76635700  | 1.77661300  | 2.25415000  |
| N  | 1.69490100  | 1.48460100  | 2.72736200  |
| C  | 0.76540000  | 2.32600000  | 3.32259200  |
| H  | -0.25725400 | 2.02530600  | 3.47833600  |
| C  | 0.00119500  | 5.89190400  | -3.65362900 |
| H  | -0.64197800 | 5.29974900  | -4.31632700 |
| H  | 0.99572700  | 5.89939800  | -4.12280300 |
| C  | 0.14552700  | 5.17856300  | -2.30821500 |
| O  | 0.26668800  | 5.78432200  | -1.24408500 |
| N  | 0.14339200  | 3.81953500  | -2.37746500 |
| H  | 0.33925500  | 3.29183600  | -1.53636000 |
| H  | 0.12496600  | 3.31211300  | -3.25443400 |
| C  | 3.39692800  | -1.34469500 | 2.45425500  |
| O  | 2.23653400  | -1.44042000 | 3.01615300  |
| O  | 3.52913100  | -0.51470700 | 1.51550500  |
| C  | 0.58352800  | 0.11222400  | -6.88803400 |
| C  | 0.69950700  | -0.93034700 | -7.80296800 |
| C  | 0.67002200  | -2.25819200 | -7.36420200 |
| C  | 0.52431600  | -2.55349900 | -6.00433200 |
| C  | 0.41299500  | -1.52486500 | -5.07327600 |
| C  | 0.44917800  | -0.20495100 | -5.53321900 |
| N  | 0.33433300  | 0.88207000  | -4.57167100 |
| O  | 0.39835900  | 0.62326100  | -3.35915100 |
| O  | 0.16768800  | 2.02695000  | -4.99541800 |
| H  | 0.60465600  | 1.14686000  | -7.20701500 |
| H  | 0.81211300  | -0.70521600 | -8.85871400 |
| H  | 0.75749900  | -3.06586300 | -8.08489600 |
| H  | 0.49152000  | -3.58535400 | -5.66947100 |
| H  | 0.28640800  | -1.73682800 | -4.01862700 |
| O  | 0.57840100  | 0.75247000  | 0.56722400  |
| O  | 1.03787400  | -1.46735800 | 0.46534400  |
| H  | 1.54469300  | -1.26789300 | -0.39774400 |
| H  | 5.47918300  | -1.85211600 | 2.56828700  |
| H  | 4.50024900  | -2.40154200 | 3.97018100  |
| H  | 4.36744300  | -3.23431500 | 2.41284500  |
| Fe | 1.26638800  | -0.24938200 | 1.76077500  |



|   |             |             |             |
|---|-------------|-------------|-------------|
| C | 4.51604600  | -2.25594800 | 2.88653900  |
| C | 0.84391200  | 4.75725200  | 4.27997300  |
| H | 1.37258500  | 4.99095900  | 5.21182900  |
| H | 0.95066100  | 5.61782100  | 3.60888000  |
| H | -0.21749800 | 4.63583300  | 4.51091200  |
| C | -0.52137000 | 7.32215000  | -3.52064300 |
| H | -3.49589400 | -0.79598300 | 5.96441100  |
| H | -3.56198300 | -2.44014800 | 5.30664500  |
| H | -2.20850300 | -1.95454300 | 6.34227300  |
| H | -0.53711900 | 7.81854700  | -4.49726600 |
| H | -1.54002800 | 7.33763600  | -3.11651900 |
| H | 0.11223900  | 7.90523000  | -2.84581800 |
| C | -2.88737300 | -1.61223800 | 5.55664100  |
| O | 2.25081200  | -0.94074000 | -1.80354200 |
| H | 2.48400500  | -1.73722900 | -2.31026500 |
| H | 1.64975200  | -0.42717300 | -2.37963300 |

NBZ-FeIII-O-C1-TS-model3:

|   |              |             |             |
|---|--------------|-------------|-------------|
| C | -31.18671500 | 11.11155200 | 7.90648800  |
| N | -31.81955900 | 11.49853600 | 6.73522500  |
| H | -32.82220200 | 11.57560800 | 6.60513600  |
| C | -30.88971100 | 11.75927500 | 5.79366900  |
| H | -31.11446000 | 12.08192800 | 4.78832700  |
| N | -29.67471900 | 11.55906100 | 6.29216900  |
| C | -29.85046700 | 11.15177600 | 7.60599200  |
| H | -29.01010700 | 10.91248800 | 8.24094100  |
| C | -27.74170400 | 15.91924000 | 7.28338500  |
| N | -26.41083200 | 15.75855300 | 6.93422500  |
| H | -25.66616500 | 16.41711200 | 7.13376000  |
| C | -26.26247100 | 14.58396200 | 6.29162800  |
| H | -25.32375700 | 14.19485500 | 5.93135500  |
| N | -27.43546800 | 13.96823600 | 6.19948700  |
| C | -28.36427900 | 14.79391300 | 6.81155100  |
| H | -29.40675200 | 14.52245200 | 6.88466900  |
| C | -29.43657400 | 18.34796000 | 0.84921100  |
| H | -30.30732800 | 17.76031700 | 0.52718700  |
| H | -28.55585200 | 17.78858800 | 0.50524300  |
| C | -29.42359600 | 18.37446800 | 2.37864100  |
| O | -29.49132700 | 19.41475200 | 3.02978800  |
| N | -29.36101300 | 17.14751300 | 2.97167700  |
| H | -29.26377300 | 17.10987000 | 3.97851300  |
| H | -29.16757100 | 16.29746100 | 2.45344900  |
| C | -25.71583300 | 10.53806900 | 5.99554000  |
| O | -26.84610000 | 9.94937500  | 6.05833400  |
| O | -25.66980200 | 11.75304000 | 5.61501800  |
| C | -29.60163000 | 11.19761800 | 1.00599700  |
| C | -29.46278600 | 10.24612000 | 0.01901700  |
| C | -28.38918800 | 10.30483400 | -0.89166500 |
| C | -27.45676500 | 11.36062300 | -0.82393700 |
| C | -27.56430100 | 12.33082900 | 0.14595300  |

|    |              |             |             |
|----|--------------|-------------|-------------|
| C  | -28.57869300 | 12.19922600 | 1.16417000  |
| N  | -29.01857300 | 13.47763000 | 1.81935000  |
| O  | -28.36359500 | 14.49333900 | 1.58231500  |
| O  | -29.99061100 | 13.43796000 | 2.56727600  |
| H  | -30.43684600 | 11.18898700 | 1.69388100  |
| H  | -30.20509200 | 9.45927400  | -0.07367700 |
| H  | -28.29719200 | 9.55195200  | -1.66803900 |
| H  | -26.65986900 | 11.42519100 | -1.55825100 |
| H  | -26.87427400 | 13.16321200 | 0.20135100  |
| O  | -27.55590000 | 11.70347700 | 2.54934200  |
| O  | -28.34309700 | 11.15034600 | 3.59759300  |
| H  | -28.17782100 | 10.14368500 | 3.54691400  |
| H  | -23.59392400 | 10.22491500 | 5.87900900  |
| H  | -24.29358300 | 10.06554300 | 7.49862500  |
| H  | -24.53893100 | 8.76468700  | 6.31900300  |
| Fe | -27.75993200 | 11.98069200 | 5.52937400  |
| C  | -24.45600900 | 9.84800100  | 6.43499700  |
| C  | -28.24600000 | 17.09401000 | 8.04400300  |
| H  | -27.74911700 | 17.18411300 | 9.01801000  |
| H  | -28.08171500 | 18.03282900 | 7.50067700  |
| H  | -29.31999800 | 16.99127300 | 8.22166600  |
| C  | -29.46900000 | 19.74099100 | 0.22200200  |
| H  | -32.50105700 | 11.60971800 | 9.53643800  |
| H  | -32.60455000 | 9.92286500  | 9.00841700  |
| H  | -31.19937200 | 10.47567200 | 9.93620700  |
| H  | -30.35548200 | 20.29761700 | 0.54198000  |
| H  | -28.58975500 | 20.32660800 | 0.51020400  |
| H  | -29.48642600 | 19.66661000 | -0.87119100 |
| C  | -31.91499700 | 10.76200000 | 9.16099500  |
| O  | -27.81915000 | 8.63208000  | 3.89583600  |
| H  | -27.37531600 | 8.84565800  | 4.75280100  |
| H  | -28.61224200 | 8.12353900  | 4.13949800  |

NBZ-FeIII-O-C2-TS1-model3:

|   |             |             |            |
|---|-------------|-------------|------------|
| C | -2.13830900 | -1.48770000 | 4.27612700 |
| N | -2.44362700 | -2.22285600 | 3.14263300 |
| H | -3.19334000 | -2.90099100 | 3.06517700 |
| C | -1.57483400 | -1.90489400 | 2.16255600 |
| H | -1.58503800 | -2.35128200 | 1.17995200 |
| N | -0.71676800 | -0.98888400 | 2.59757300 |
| C | -1.05965700 | -0.72505400 | 3.91479900 |
| H | -0.50535700 | -0.01572500 | 4.51126100 |
| C | 1.27800100  | 3.52788400  | 3.55967000 |
| N | 2.59785500  | 3.29081900  | 3.21122700 |
| H | 3.37561200  | 3.91568200  | 3.39304100 |
| C | 2.68701600  | 2.10038900  | 2.59155700 |
| H | 3.60066600  | 1.66191400  | 2.22232300 |
| N | 1.48258800  | 1.53961600  | 2.51661400 |
| C | 0.59767900  | 2.42409200  | 3.11621000 |

|    |             |             |             |
|----|-------------|-------------|-------------|
| H  | -0.45670600 | 2.20363900  | 3.19268500  |
| C  | 0.49318500  | 6.18902400  | -3.36736800 |
| H  | 0.35794900  | 5.66702200  | -2.41332300 |
| H  | 0.33327300  | 5.43942000  | -4.15581700 |
| C  | 1.93861500  | 6.67030900  | -3.50221700 |
| O  | 2.25310500  | 7.61801800  | -4.21962200 |
| N  | 2.85409000  | 5.95438200  | -2.79445200 |
| H  | 3.83361400  | 6.19045600  | -2.88865000 |
| H  | 2.59939200  | 5.18017500  | -2.19251100 |
| C  | 3.34745000  | -1.52364500 | 2.29047500  |
| O  | 2.16572700  | -1.83184400 | 2.68834100  |
| O  | 3.49339300  | -0.58594200 | 1.45283400  |
| H  | 4.31377600  | -3.33064400 | 2.91958500  |
| H  | 5.43187500  | -2.06187000 | 2.32426700  |
| H  | 4.65366000  | -1.91514800 | 3.92032300  |
| Fe | 1.11548300  | -0.37993100 | 1.76875900  |
| C  | 4.51604600  | -2.25594800 | 2.88653900  |
| C  | 0.84391200  | 4.75725200  | 4.27997300  |
| H  | 1.35153400  | 4.85378100  | 5.24758800  |
| H  | 1.06068300  | 5.66252400  | 3.69963700  |
| H  | -0.23308900 | 4.72330900  | 4.46509700  |
| C  | -0.52137000 | 7.32215000  | -3.52064300 |
| H  | -3.95415200 | -1.39211000 | 5.42710200  |
| H  | -2.80572000 | -2.62395700 | 5.97275400  |
| H  | -2.48403000 | -0.91174800 | 6.29288500  |
| H  | -0.36087900 | 7.85577300  | -4.46192400 |
| H  | -1.54493900 | 6.93112500  | -3.51320300 |
| H  | -0.43166900 | 8.05071000  | -2.70633000 |
| C  | -2.88737400 | -1.61223800 | 5.55664100  |
| C  | -0.90021400 | 2.75684200  | -0.48272000 |
| C  | -2.15855200 | 2.14011000  | -0.38668000 |
| C  | -2.36767200 | 0.85605600  | -0.92743700 |
| C  | -1.33049000 | 0.16911100  | -1.52604000 |
| C  | 0.00411600  | 0.71957600  | -1.55817200 |
| C  | 0.13765000  | 2.07906600  | -1.09695600 |
| N  | 1.41627200  | 2.72711700  | -1.26193700 |
| O  | 2.33992000  | 2.09311400  | -1.78958800 |
| O  | 1.53515100  | 3.89970800  | -0.87803500 |
| H  | -0.74481900 | 3.76013400  | -0.10550500 |
| H  | -2.97653500 | 2.67349000  | 0.08588500  |
| H  | -3.35859100 | 0.41441500  | -0.88853200 |
| H  | -1.48366600 | -0.81393200 | -1.95796200 |
| H  | 0.66644800  | 0.39505400  | -2.35200000 |
| O  | 0.90387500  | -0.22216800 | -0.29430500 |
| O  | 1.21804200  | -1.51447100 | -0.79610500 |
| H  | 2.15778700  | -1.32625300 | -1.12956900 |
| O  | 3.64461400  | -0.65280000 | -1.31544400 |
| H  | 3.40171400  | 0.26674600  | -1.52879200 |
| H  | 3.84437500  | -0.62746600 | -0.35229800 |

NBZ-FeIII-O-C2-INT1-model3:

|    |             |             |             |
|----|-------------|-------------|-------------|
| C  | -2.99513000 | -2.87621700 | 3.60285300  |
| N  | -3.21630200 | -3.69272500 | 2.50668300  |
| H  | -3.93732400 | -4.40193400 | 2.43755700  |
| C  | -2.31287200 | -3.40106500 | 1.54968800  |
| H  | -2.26222100 | -3.90561400 | 0.59692300  |
| N  | -1.50911300 | -2.42902300 | 1.96462100  |
| C  | -1.92624500 | -2.09715300 | 3.24457600  |
| H  | -1.42890900 | -1.32913000 | 3.81857700  |
| C  | 0.38660000  | 2.21664300  | 2.86289900  |
| N  | 1.71669100  | 1.97533200  | 2.55765300  |
| H  | 2.48859900  | 2.60196600  | 2.75698300  |
| C  | 1.82402500  | 0.77865400  | 1.95196000  |
| H  | 2.74865600  | 0.33869600  | 1.61284400  |
| N  | 0.62287400  | 0.21773400  | 1.84228400  |
| C  | -0.27917100 | 1.10751400  | 2.40885900  |
| H  | -1.33624200 | 0.89018200  | 2.45170000  |
| C  | -0.35477500 | 4.86809900  | -3.94700500 |
| H  | -0.67602500 | 4.33287100  | -3.04642700 |
| H  | -0.36991100 | 4.13423300  | -4.76595900 |
| C  | 1.09475000  | 5.33087800  | -3.79270200 |
| O  | 1.55729300  | 6.27327700  | -4.43320300 |
| N  | 1.84117800  | 4.60498300  | -2.91706200 |
| H  | 2.82173400  | 4.83176700  | -2.81186900 |
| H  | 1.45887200  | 3.84062000  | -2.37170900 |
| C  | 2.54843100  | -2.92127700 | 1.45387200  |
| O  | 1.41584800  | -3.28084500 | 1.92792600  |
| O  | 2.60193400  | -1.90036700 | 0.69862800  |
| H  | 3.58870900  | -4.76087700 | 1.81457700  |
| H  | 4.62647500  | -3.43237900 | 1.20327900  |
| H  | 4.03710000  | -3.42851700 | 2.88356000  |
| Fe | 0.31621100  | -1.74466400 | 1.14546400  |
| C  | 3.78176700  | -3.68463700 | 1.84767100  |
| C  | -0.06885700 | 3.45983400  | 3.54979400  |
| H  | 0.41369000  | 3.57695800  | 4.52778700  |
| H  | 0.16018200  | 4.35368700  | 2.95669500  |
| H  | -1.15013200 | 3.42621000  | 3.70805700  |
| C  | -1.30847700 | 6.01844300  | -4.26964200 |
| H  | -4.87535100 | -2.71481900 | 4.63621500  |
| H  | -3.77537100 | -3.92834400 | 5.30846000  |
| H  | -3.45641300 | -2.20606600 | 5.56762500  |
| H  | -0.97646600 | 6.55305900  | -5.16427600 |
| H  | -2.32275300 | 5.64323700  | -4.44646200 |
| H  | -1.35322400 | 6.74131900  | -3.44659100 |
| C  | -3.82077100 | -2.93722100 | 4.84096400  |
| C  | -2.22325800 | 1.30358200  | -1.30346300 |
| C  | -3.44250100 | 0.60393700  | -1.36767500 |
| C  | -3.48015100 | -0.74939900 | -1.79703400 |
| C  | -2.33190300 | -1.40990700 | -2.12710200 |

|   |             |             |             |
|---|-------------|-------------|-------------|
| C | -0.98165400 | -0.76853000 | -2.03013800 |
| C | -1.04631900 | 0.67124100  | -1.63440000 |
| N | 0.17328200  | 1.42104200  | -1.67647600 |
| O | 1.19455900  | 0.87152100  | -2.12097300 |
| O | 0.16158800  | 2.60052400  | -1.28502500 |
| H | -2.20757300 | 2.35002900  | -1.02352800 |
| H | -4.36084800 | 1.11791100  | -1.10470500 |
| H | -4.43763400 | -1.25682800 | -1.86469800 |
| H | -2.34580200 | -2.44552000 | -2.45019500 |
| H | -0.41742400 | -0.89505700 | -2.96115100 |
| O | -0.17569200 | -1.45616400 | -1.00063200 |
| O | 0.25578700  | -2.74488900 | -1.51028500 |
| H | 1.19389500  | -2.48381800 | -1.80780200 |
| O | 2.63967900  | -1.78012400 | -2.03186900 |
| H | 2.36952600  | -0.85420400 | -2.17227900 |
| H | 2.90188600  | -1.81001200 | -1.08275600 |

NBZ-FeIII-O-C2-TS2-model3:

|   |             |             |             |
|---|-------------|-------------|-------------|
| C | -2.14859400 | -1.26720600 | 4.31159800  |
| N | -2.76128300 | -1.09449900 | 3.07847400  |
| H | -3.75432800 | -1.18975800 | 2.89611700  |
| C | -1.82788700 | -0.79161200 | 2.15779400  |
| H | -2.02129600 | -0.61487900 | 1.11007600  |
| N | -0.63073900 | -0.75498400 | 2.73587300  |
| C | -0.81801600 | -1.05381000 | 4.07494000  |
| H | 0.00961900  | -1.10400700 | 4.76665600  |
| C | 1.25726600  | 3.60702300  | 3.42666300  |
| N | 2.44306100  | 3.58159000  | 2.70812600  |
| H | 3.12913200  | 4.32796300  | 2.67507400  |
| C | 2.54693200  | 2.40750500  | 2.06168800  |
| H | 3.38866100  | 2.11750500  | 1.45326900  |
| N | 1.47757200  | 1.65818300  | 2.31761800  |
| C | 0.66635900  | 2.40004000  | 3.16525500  |
| H | -0.27123900 | 2.01467900  | 3.53526900  |
| C | -0.07427700 | 5.86241300  | -3.49956300 |
| H | -0.49031500 | 5.35148200  | -2.61921200 |
| H | -0.46320600 | 5.32197500  | -4.37105600 |
| C | 1.44654400  | 5.70391500  | -3.44652800 |
| O | 2.20172900  | 6.62325400  | -3.13309500 |
| N | 1.89773800  | 4.46079500  | -3.76409200 |
| H | 2.88729200  | 4.26974500  | -3.67541600 |
| H | 1.27088400  | 3.68160300  | -3.93916900 |
| C | 3.31192000  | -1.50516300 | 2.40888300  |
| O | 2.15367400  | -1.81763600 | 2.85881900  |
| O | 3.39528100  | -0.53704600 | 1.58689700  |
| H | 4.32329500  | -3.33247800 | 2.85323600  |
| H | 5.39581400  | -2.01133700 | 2.28815400  |
| H | 4.70828600  | -1.98910800 | 3.93301600  |
| C | 4.51604600  | -2.25594800 | 2.88653900  |
| C | 0.84391200  | 4.75725200  | 4.27997300  |

|    |             |             |             |
|----|-------------|-------------|-------------|
| H  | 1.56771600  | 4.94258100  | 5.08277600  |
| H  | 0.75157400  | 5.68048100  | 3.69508000  |
| H  | -0.12585800 | 4.54915200  | 4.73968100  |
| C  | -0.52137000 | 7.32215000  | -3.52064300 |
| H  | -2.18558900 | -1.69930400 | 6.39034900  |
| H  | -3.62786800 | -0.84499400 | 5.81402700  |
| H  | -3.41894600 | -2.56674900 | 5.45936800  |
| H  | -0.16219700 | 7.83482600  | -4.41976100 |
| H  | -1.61501300 | 7.38971300  | -3.50651300 |
| H  | -0.13037200 | 7.86400600  | -2.65414600 |
| C  | -2.88737300 | -1.61223800 | 5.55664100  |
| C  | -2.13755100 | 0.36160500  | -3.76490500 |
| C  | -3.04115400 | -0.69135900 | -3.56235700 |
| C  | -2.69498800 | -1.80869100 | -2.74987700 |
| C  | -1.48154300 | -1.87147600 | -2.13082500 |
| C  | -0.47544200 | -0.75728100 | -2.20878700 |
| C  | -0.89211500 | 0.31348200  | -3.17303200 |
| N  | 0.06600000  | 1.34563600  | -3.44172900 |
| O  | 1.20481100  | 1.23531100  | -2.96460500 |
| O  | -0.27564300 | 2.30465700  | -4.15920900 |
| H  | -2.39933600 | 1.20107700  | -4.39791600 |
| H  | -4.01555600 | -0.65035700 | -4.03789900 |
| H  | -3.41444300 | -2.61328600 | -2.62846000 |
| H  | -1.21333100 | -2.71607100 | -1.50269900 |
| H  | 0.52565700  | -1.13478500 | -2.45267300 |
| O  | -0.42862800 | -0.04502200 | -0.96617600 |
| O  | 0.88713300  | -0.82725200 | 0.06767900  |
| H  | 1.65719200  | -0.63558000 | -0.55930800 |
| O  | 3.13326300  | -0.44418600 | -1.23409400 |
| H  | 3.14465400  | 0.44973600  | -1.61662700 |
| H  | 3.62775600  | -0.39390000 | -0.39087000 |
| Fe | 1.17873300  | -0.33552200 | 1.82883200  |

NBZ-FeIII-O1-C2-TS-model3:

|   |             |            |             |
|---|-------------|------------|-------------|
| C | -4.90349200 | 2.30807300 | 2.97727500  |
| N | -5.53740900 | 1.61879100 | 1.95691300  |
| H | -6.04737800 | 0.74903900 | 2.06260600  |
| C | -5.36839200 | 2.28871100 | 0.79805300  |
| H | -5.77449100 | 1.96938600 | -0.14949400 |
| N | -4.64538400 | 3.38112300 | 1.00968000  |
| C | -4.34771800 | 3.40007200 | 2.36363800  |
| H | -3.75902000 | 4.19219900 | 2.80390400  |
| C | -7.88530800 | 7.12364300 | 1.22948800  |
| N | -8.06312200 | 7.20633700 | -0.14285900 |
| H | -8.83705100 | 7.64946300 | -0.62724000 |
| C | -7.04629100 | 6.56511200 | -0.75404500 |
| H | -6.93907700 | 6.48846400 | -1.82495500 |
| N | -6.21117900 | 6.06595500 | 0.14681500  |
| C | -6.72576600 | 6.40900800 | 1.38560700  |

|    |              |            |             |
|----|--------------|------------|-------------|
| H  | -6.23291500  | 6.12468300 | 2.30419800  |
| C  | -11.45727700 | 6.30558700 | -3.86157500 |
| H  | -12.01362700 | 6.08336000 | -2.94053500 |
| H  | -10.75422800 | 5.47950400 | -4.01347700 |
| C  | -10.70913500 | 7.61569300 | -3.62404400 |
| O  | -11.27877300 | 8.70263800 | -3.61331400 |
| N  | -9.36630700  | 7.49136100 | -3.36958600 |
| H  | -8.82662100  | 8.34989100 | -3.39726100 |
| H  | -8.87427300  | 6.64783400 | -3.64941100 |
| C  | -2.11545100  | 6.29072600 | -0.10658400 |
| O  | -2.08832900  | 5.02385300 | -0.30230100 |
| O  | -3.23651400  | 6.86056500 | 0.05600800  |
| C  | -6.48937500  | 2.75136500 | -5.24192500 |
| C  | -5.63663800  | 1.76116000 | -5.76651100 |
| C  | -4.23824700  | 1.96311600 | -5.80612100 |
| C  | -3.67806800  | 3.09984400 | -5.27239000 |
| C  | -4.50491400  | 4.07313900 | -4.56547800 |
| C  | -5.94188200  | 3.90231200 | -4.72134900 |
| N  | -6.80868400  | 4.97893300 | -4.29967700 |
| O  | -6.32022400  | 6.10324100 | -4.15154900 |
| O  | -8.01083600  | 4.72890800 | -4.13067300 |
| H  | -7.56560500  | 2.63512200 | -5.28858000 |
| H  | -6.06813700  | 0.85846900 | -6.18548400 |
| H  | -3.60761300  | 1.22339600 | -6.28941900 |
| H  | -2.60867700  | 3.27708800 | -5.31665600 |
| H  | -4.14721600  | 5.09685800 | -4.52017600 |
| O  | -4.90654600  | 4.60769600 | -2.04701100 |
| O  | -4.22884000  | 3.64339200 | -2.89896800 |
| H  | -3.18798600  | 3.79831500 | -2.77961400 |
| H  | -1.02466400  | 8.14515600 | -0.01709900 |
| H  | -0.27513800  | 6.77840600 | 0.85021400  |
| H  | -0.20466600  | 6.82937700 | -0.91223000 |
| Fe | -4.36086800  | 5.07790900 | -0.21757500 |
| C  | -0.83214900  | 7.07124200 | -0.04796700 |
| C  | -8.81359200  | 7.73673200 | 2.22240700  |
| H  | -8.87885500  | 8.82429800 | 2.09478700  |
| H  | -9.82969000  | 7.33225800 | 2.13524900  |
| H  | -8.45583800  | 7.53709900 | 3.23621800  |
| C  | -12.43658200 | 6.41063000 | -5.03547900 |
| H  | -5.94139100  | 1.82086600 | 4.79606700  |
| H  | -4.47478000  | 0.86815000 | 4.51980800  |
| H  | -4.34763600  | 2.56488500 | 5.01365900  |
| H  | -13.02506100 | 5.49158200 | -5.13075500 |
| H  | -13.12402100 | 7.24842600 | -4.88616200 |
| H  | -11.90711300 | 6.57230300 | -5.98191200 |
| C  | -4.91942600  | 1.86375100 | 4.39989200  |
| O  | -1.73187000  | 3.97546900 | -2.66329700 |
| H  | -1.65940900  | 4.41060200 | -1.76408500 |
| H  | -1.30311500  | 3.10581600 | -2.56666700 |

NBZ-FeV-O-C1-TS-model3:

|    |              |             |             |
|----|--------------|-------------|-------------|
| C  | -31.11716600 | 11.20621100 | 7.97874400  |
| N  | -31.70411000 | 11.57099100 | 6.77907300  |
| H  | -32.69990900 | 11.57800900 | 6.58812200  |
| C  | -30.73892900 | 11.91394800 | 5.90041700  |
| H  | -30.92970100 | 12.23301500 | 4.88773800  |
| N  | -29.54669600 | 11.79738200 | 6.46947900  |
| C  | -29.76767100 | 11.35598600 | 7.76441000  |
| H  | -28.95132300 | 11.18543100 | 8.45065600  |
| C  | -27.70233300 | 15.79563300 | 7.53025200  |
| N  | -26.34899000 | 15.48138500 | 7.54790800  |
| H  | -25.61099800 | 16.07334700 | 7.91319100  |
| C  | -26.16279100 | 14.26747800 | 7.00114100  |
| H  | -25.20459600 | 13.79370400 | 6.86381700  |
| N  | -27.33652500 | 13.75813500 | 6.63363300  |
| C  | -28.30075500 | 14.70431200 | 6.95636200  |
| H  | -29.34534700 | 14.53928100 | 6.74735000  |
| C  | -28.41401300 | 18.75513300 | 0.71942800  |
| H  | -28.87888000 | 17.83326500 | 1.08860000  |
| H  | -27.75926400 | 18.45722800 | -0.11254000 |
| C  | -27.51517000 | 19.34713900 | 1.80478000  |
| O  | -27.32190000 | 20.55540000 | 1.92345100  |
| N  | -26.93445100 | 18.42912500 | 2.62666200  |
| H  | -26.22856100 | 18.74751500 | 3.27839200  |
| H  | -27.02241000 | 17.43162900 | 2.46808000  |
| C  | -25.53559900 | 10.86814800 | 6.16652000  |
| O  | -26.69167000 | 10.74376900 | 6.73558600  |
| O  | -25.37799200 | 11.81312600 | 5.35087000  |
| C  | -29.38040500 | 12.71844300 | 2.04647600  |
| C  | -29.43933600 | 11.39663800 | 1.66752000  |
| C  | -28.25133500 | 10.67842300 | 1.41957500  |
| C  | -26.99341700 | 11.30760700 | 1.49686800  |
| C  | -26.90336000 | 12.62574500 | 1.88111100  |
| C  | -28.09951400 | 13.31164400 | 2.25740600  |
| N  | -28.04807000 | 14.80378700 | 2.28478700  |
| O  | -26.94167400 | 15.33311600 | 2.17710700  |
| O  | -29.10379100 | 15.41202000 | 2.41140200  |
| H  | -30.26948200 | 13.31278200 | 2.21370300  |
| H  | -30.40082300 | 10.90951300 | 1.54156000  |
| H  | -28.31040200 | 9.63676600  | 1.11926800  |
| H  | -26.09393500 | 10.75241500 | 1.25252200  |
| H  | -25.95515500 | 13.14365600 | 1.94406100  |
| O  | -27.96644600 | 13.32243300 | 4.18429000  |
| O  | -27.93396900 | 10.75981900 | 4.34040600  |
| H  | -28.16563800 | 9.93838900  | 4.87143100  |
| H  | -23.48159200 | 10.22927500 | 6.12366400  |
| H  | -24.43745000 | 9.57288900  | 7.49337300  |
| H  | -24.68493700 | 8.94482400  | 5.85543400  |
| Fe | -27.63066300 | 12.11072200 | 5.43077000  |



|   |              |             |             |
|---|--------------|-------------|-------------|
| C | -24.45601100 | 9.84801100  | 6.43499700  |
| C | -28.24600000 | 17.09400100 | 8.04400200  |
| H | -28.03371000 | 17.22425100 | 9.11197400  |
| H | -27.81070600 | 17.94576200 | 7.50817000  |
| H | -29.32975300 | 17.12207600 | 7.90441500  |
| C | -29.46899800 | 19.74098900 | 0.22200400  |
| H | -32.61007400 | 11.54291100 | 9.49233300  |
| H | -32.50454500 | 9.86548400  | 8.93329800  |
| H | -31.24837700 | 10.52662800 | 9.99498200  |
| H | -30.03964000 | 19.30974600 | -0.60807600 |
| H | -30.17542900 | 20.00306100 | 1.01809600  |
| H | -29.00100600 | 20.66740300 | -0.12328200 |
| C | -31.91499300 | 10.76200100 | 9.16099200  |
| O | -28.27792000 | 8.63968900  | 5.98092000  |
| H | -27.63618800 | 9.12486100  | 6.54383300  |
| H | -29.12217000 | 8.72544400  | 6.45665800  |

NBZ-FeV-O-C2-TS-model3:

|   |             |             |             |
|---|-------------|-------------|-------------|
| C | -2.11715000 | -1.11446900 | 4.37909000  |
| N | -2.72575700 | -0.43936900 | 3.33297500  |
| H | -3.71501700 | -0.22760100 | 3.26544200  |
| C | -1.79401700 | -0.11037600 | 2.41831800  |
| H | -1.99835700 | 0.42333100  | 1.50394300  |
| N | -0.60055000 | -0.53673500 | 2.81668600  |
| C | -0.78850400 | -1.16636200 | 4.03547900  |
| H | 0.03641900  | -1.60952800 | 4.57218300  |
| C | 1.32900000  | 3.51604800  | 3.59706400  |
| N | 2.64672900  | 3.34010100  | 3.19638600  |
| H | 3.39603700  | 4.01231100  | 3.32099900  |
| C | 2.78321300  | 2.13452500  | 2.61919300  |
| H | 3.70182400  | 1.74213600  | 2.21459200  |
| N | 1.61111900  | 1.50112300  | 2.62611400  |
| C | 0.69859500  | 2.35586500  | 3.22906600  |
| H | -0.33552400 | 2.08223300  | 3.35758000  |
| C | 0.56855200  | 6.25395900  | -3.56796200 |
| H | 0.31512200  | 5.40426200  | -2.92268400 |
| H | 0.65396400  | 5.84507600  | -4.58501700 |
| C | 1.94844200  | 6.78308900  | -3.17602300 |
| O | 2.22496100  | 7.97976400  | -3.16234900 |
| N | 2.85411800  | 5.82030800  | -2.83510100 |
| H | 3.82141600  | 6.09762600  | -2.72351500 |
| H | 2.66292200  | 4.83634200  | -2.98172200 |
| C | 3.38872400  | -1.32868200 | 2.50538200  |
| O | 2.27868700  | -1.34572600 | 3.13237700  |
| O | 3.49644700  | -0.55302200 | 1.49815300  |
| C | -0.96134400 | 2.15694400  | -2.42087200 |
| C | -2.22603900 | 1.63046300  | -2.09792900 |
| C | -2.34295900 | 0.37362300  | -1.48765900 |
| C | -1.20605600 | -0.35552200 | -1.16715900 |
| C | 0.09303600  | 0.18297400  | -1.40877900 |

|    |             |             |             |
|----|-------------|-------------|-------------|
| C  | 0.16518300  | 1.42266100  | -2.10753700 |
| N  | 1.47727300  | 1.93763200  | -2.46741100 |
| O  | 2.47900000  | 1.30164600  | -2.12283500 |
| O  | 1.52778100  | 2.99421100  | -3.10231800 |
| H  | -0.87212000 | 3.11063200  | -2.92566000 |
| H  | -3.11450000 | 2.20188100  | -2.34606100 |
| H  | -3.32692500 | -0.03698000 | -1.28390500 |
| H  | -1.27562800 | -1.33475600 | -0.70783600 |
| H  | 0.93933200  | -0.48235300 | -1.44534400 |
| O  | 0.59030600  | 0.75595200  | 0.41403100  |
| O  | 1.09809200  | -1.74571600 | 0.69814400  |
| H  | 1.78105300  | -1.74652800 | -0.03601200 |
| H  | 5.47988800  | -1.76196900 | 2.73854300  |
| H  | 4.41489900  | -2.59675500 | 3.91906900  |
| H  | 4.47442300  | -3.12875000 | 2.22286900  |
| Fe | 1.21255600  | -0.29228300 | 1.68691600  |
| C  | 4.51604400  | -2.25594700 | 2.88654000  |
| C  | 0.84391200  | 4.75725200  | 4.27997200  |
| H  | 1.35602500  | 4.91256500  | 5.23720100  |
| H  | 1.01550700  | 5.64545000  | 3.66037400  |
| H  | -0.22856100 | 4.67929100  | 4.47624000  |
| C  | -0.52137000 | 7.32215000  | -3.52064300 |
| H  | -3.39702500 | -0.79295700 | 6.07815600  |
| H  | -3.64864400 | -2.34311300 | 5.25787100  |
| H  | -2.21294700 | -2.09787800 | 6.26684600  |
| H  | -0.65991700 | 7.70575500  | -2.50350400 |
| H  | -0.26459100 | 8.17132900  | -4.16069200 |
| H  | -1.47827700 | 6.91119200  | -3.86180000 |
| C  | -2.88737200 | -1.61223800 | 5.55664000  |
| O  | 3.16728700  | -1.46190900 | -1.05818300 |
| H  | 3.05807800  | -0.65548800 | -1.59403200 |
| H  | 3.63909900  | -1.14662800 | -0.25646900 |

NBZ-FeV-O1-C2-TS-model3:

|   |              |             |            |
|---|--------------|-------------|------------|
| C | -31.10020000 | 11.15033900 | 7.96770600 |
| N | -31.68266300 | 11.67118400 | 6.82223300 |
| H | -32.67612500 | 11.82061300 | 6.68537700 |
| C | -30.72066800 | 11.96074400 | 5.92688700 |
| H | -30.89682700 | 12.40239900 | 4.95950100 |
| N | -29.53032000 | 11.64969600 | 6.42815800 |
| C | -29.75271800 | 11.13779500 | 7.69723800 |
| H | -28.93699300 | 10.80467100 | 8.32135700 |
| C | -27.67662400 | 15.80333300 | 7.53827000 |
| N | -26.32669900 | 15.48278900 | 7.59239200 |
| H | -25.59464900 | 16.07152300 | 7.97370600 |
| C | -26.13158500 | 14.26998600 | 7.03798700 |
| H | -25.17143600 | 13.79501700 | 6.91791900 |
| N | -27.29407500 | 13.77417500 | 6.63005700 |
| C | -28.26079700 | 14.72229000 | 6.93312100 |

|    |              |             |             |
|----|--------------|-------------|-------------|
| H  | -29.29901600 | 14.56934500 | 6.68703300  |
| C  | -29.25367800 | 18.41049700 | 0.94493500  |
| H  | -29.91760700 | 18.34961100 | 1.81947600  |
| H  | -29.52059800 | 17.56388100 | 0.30054200  |
| C  | -27.82159600 | 18.23958900 | 1.45419400  |
| O  | -27.08749700 | 19.19708300 | 1.69451900  |
| N  | -27.42252600 | 16.95201400 | 1.63871700  |
| H  | -26.51120200 | 16.78424300 | 2.04557500  |
| H  | -28.03065400 | 16.15258800 | 1.50059800  |
| C  | -25.48283300 | 10.91401400 | 6.08835500  |
| O  | -26.67929300 | 10.81378100 | 6.54960100  |
| O  | -25.20437900 | 11.85415100 | 5.29109600  |
| C  | -30.36103800 | 11.88723800 | 1.74104500  |
| C  | -30.90360300 | 10.58455600 | 1.77346000  |
| C  | -30.06876000 | 9.46214000  | 1.87246100  |
| C  | -28.69747100 | 9.62788400  | 1.97739900  |
| C  | -28.11782500 | 10.93775000 | 2.03762600  |
| C  | -28.99617300 | 12.04274800 | 1.84630300  |
| N  | -28.41496900 | 13.37660800 | 1.69711900  |
| O  | -27.19090700 | 13.47759800 | 1.69992900  |
| O  | -29.18973100 | 14.32813100 | 1.55250800  |
| H  | -30.99990100 | 12.75042200 | 1.60020500  |
| H  | -31.97821500 | 10.45906400 | 1.68902200  |
| H  | -30.49757300 | 8.46572900  | 1.85506500  |
| H  | -28.03748700 | 8.77004500  | 2.04700400  |
| H  | -27.06602200 | 11.06997900 | 1.81624900  |
| O  | -28.50261100 | 13.16831500 | 4.44460600  |
| O  | -27.62640000 | 10.75742600 | 4.01180900  |
| H  | -26.69877400 | 10.50173000 | 3.75492200  |
| H  | -23.44408400 | 10.23844600 | 6.30728300  |
| H  | -24.59846900 | 9.48411500  | 7.45598400  |
| H  | -24.59837100 | 8.99932300  | 5.75398000  |
| Fe | -27.71309000 | 12.14040700 | 5.43687300  |
| C  | -24.45600400 | 9.84800300  | 6.43500000  |
| C  | -28.24600000 | 17.09400100 | 8.04400000  |
| H  | -28.06436800 | 17.22205500 | 9.11795000  |
| H  | -27.80607400 | 17.95370200 | 7.52464000  |
| H  | -29.32592000 | 17.11041000 | 7.87518600  |
| C  | -29.46900000 | 19.74099900 | 0.22200000  |
| H  | -32.44872600 | 11.62513700 | 9.57686100  |
| H  | -32.65937600 | 9.99791700  | 8.90670300  |
| H  | -31.26623800 | 10.35611900 | 9.94183100  |
| H  | -30.52226100 | 19.86437200 | -0.05377700 |
| H  | -29.17669000 | 20.57905000 | 0.86121200  |
| H  | -28.87029700 | 19.79726600 | -0.69438500 |
| C  | -31.91499900 | 10.76200000 | 9.16099800  |
| O  | -25.11811000 | 10.43581800 | 2.97466200  |
| H  | -24.57178700 | 9.63692300  | 3.06383300  |
| H  | -24.77649800 | 11.06556200 | 3.64665800  |

*Fe<sup>III</sup>-OOH and HO-Fe<sup>V</sup>=O attacks Model 4*

*Nitrobenzene Model 4*

NBZ-FeIII-RC-model4:

|   |             |             |             |
|---|-------------|-------------|-------------|
| C | -1.77938900 | -6.06738600 | -0.98289900 |
| H | -1.00203500 | -6.74561700 | -1.35208400 |
| H | -2.59016800 | -6.11433600 | -1.72218100 |
| C | -1.19003200 | -4.66529700 | -1.08186400 |
| O | -0.57361900 | -4.32208500 | -2.10847200 |
| N | -1.39250300 | -3.83134500 | -0.04432100 |
| H | -0.95444400 | -2.91257200 | -0.03271400 |
| H | -1.81810000 | -4.15544200 | 0.81268300  |
| C | -2.11946800 | -1.16908100 | 4.36101300  |
| N | -2.72673300 | -0.65455400 | 3.22489100  |
| H | -3.72474100 | -0.52666900 | 3.09747200  |
| C | -1.78154800 | -0.34852000 | 2.31814300  |
| H | -1.97573600 | 0.06468900  | 1.34052600  |
| N | -0.57976000 | -0.63811100 | 2.81074100  |
| C | -0.77866400 | -1.15171700 | 4.08097500  |
| H | 0.04860900  | -1.47718100 | 4.69299300  |
| C | 1.32750600  | 3.55313300  | 3.55205800  |
| N | 2.58480600  | 3.46011100  | 2.97243700  |
| H | 3.29002800  | 4.18920900  | 2.97250500  |
| C | 2.72399200  | 2.25161500  | 2.40377400  |
| H | 3.60522400  | 1.90995600  | 1.88353000  |
| N | 1.61040500  | 1.54357800  | 2.58567500  |
| C | 0.73483900  | 2.34734000  | 3.29919100  |
| H | -0.24724600 | 2.00556000  | 3.58429500  |
| C | -0.67096500 | 5.80632100  | -3.67054200 |
| H | -1.73543600 | 5.53524900  | -3.72169800 |
| H | -0.22834000 | 5.46181800  | -4.61400000 |
| C | -0.05265800 | 5.01900900  | -2.51296800 |
| O | 0.27851000  | 5.54599400  | -1.45147800 |
| N | 0.09935500  | 3.68412000  | -2.73614300 |
| H | 0.43882600  | 3.10511600  | -1.97867600 |
| H | -0.22599200 | 3.20844600  | -3.56960500 |
| C | 3.24772800  | -1.58851100 | 2.44794300  |
| O | 2.12200500  | -1.87964000 | 2.96506000  |
| O | 3.25975300  | -0.68273900 | 1.53838500  |
| C | -1.79511100 | -0.35490600 | -6.61765200 |
| C | -2.35728800 | -1.36461000 | -7.39388800 |
| C | -2.50064400 | -2.65517400 | -6.87357900 |
| C | -2.08207600 | -2.94373100 | -5.57073300 |
| C | -1.51078500 | -1.94901600 | -4.78174300 |
| C | -1.37329900 | -0.66795200 | -5.32261600 |
| N | -0.77572700 | 0.38678400  | -4.51032200 |
| O | -0.19102000 | 0.07886400  | -3.46367100 |

|    |             |             |             |
|----|-------------|-------------|-------------|
| O  | -0.88489900 | 1.55235000  | -4.90094300 |
| H  | -1.67179700 | 0.64995100  | -7.00213000 |
| H  | -2.68071500 | -1.14364300 | -8.40614400 |
| H  | -2.94080400 | -3.43761900 | -7.48470700 |
| H  | -2.19657000 | -3.94342900 | -5.16424700 |
| H  | -1.19785700 | -2.16333300 | -3.76805400 |
| O  | 0.45752900  | -0.09888600 | 0.12462100  |
| O  | 0.47965200  | -1.54735200 | 0.09124000  |
| H  | 0.94273200  | -1.75660100 | -0.80699200 |
| H  | 5.22891000  | -1.49696200 | 3.22710900  |
| H  | 4.32303000  | -2.97093200 | 3.68794100  |
| H  | 4.97089700  | -2.77078000 | 2.03267200  |
| Fe | 1.23117800  | -0.33304700 | 1.81339000  |
| C  | 4.51604600  | -2.25594800 | 2.88653900  |
| H  | -2.64466300 | -7.56042700 | 0.32389500  |
| H  | -1.48990200 | -6.50349100 | 1.14357900  |
| H  | -3.12303000 | -5.91697000 | 0.74637400  |
| C  | 0.84391200  | 4.75725200  | 4.27997300  |
| H  | 1.48487200  | 4.99232100  | 5.13863800  |
| H  | 0.82153100  | 5.64025600  | 3.62989500  |
| H  | -0.16978500 | 4.58417700  | 4.65070900  |
| C  | -0.52137000 | 7.32215000  | -3.52064300 |
| H  | -3.46502900 | -0.78844200 | 5.99344200  |
| H  | -3.59068400 | -2.41657800 | 5.30836400  |
| H  | -2.20157600 | -1.98747500 | 6.32088200  |
| C  | -2.28518200 | -6.52820600 | 0.38930400  |
| H  | -1.02409400 | 7.83854600  | -4.34589400 |
| H  | -0.95873800 | 7.66758100  | -2.57908900 |
| H  | 0.53285300  | 7.61983000  | -3.52523500 |
| C  | -2.88737300 | -1.61223800 | 5.55664100  |
| O  | 1.23261900  | -2.24827600 | -2.24214300 |
| H  | 0.60399100  | -3.01709500 | -2.28209600 |
| H  | 0.84357900  | -1.56029500 | -2.81515700 |

NBZ-FeV-RC-model4:

|   |             |             |             |
|---|-------------|-------------|-------------|
| C | -1.85466900 | -5.78898500 | -0.88214600 |
| H | -1.25716300 | -6.44887900 | -1.52278500 |
| H | -2.73321500 | -5.51473700 | -1.47980300 |
| C | -1.03925100 | -4.51085800 | -0.72728000 |
| O | -0.65178700 | -3.90499300 | -1.74638800 |
| N | -0.77248000 | -4.07823500 | 0.51742500  |
| H | -0.22972900 | -3.22843300 | 0.66243400  |
| H | -1.06093000 | -4.59982200 | 1.33357700  |
| C | -2.11006200 | -1.12932200 | 4.38102800  |
| N | -2.71793700 | -0.60122800 | 3.25362300  |
| H | -3.71716600 | -0.49285200 | 3.11982900  |
| C | -1.76897500 | -0.24681800 | 2.36557100  |
| H | -1.96877600 | 0.19690500  | 1.40258400  |
| N | -0.56724600 | -0.51611800 | 2.86321700  |

|    |             |             |             |
|----|-------------|-------------|-------------|
| C  | -0.76519900 | -1.07035200 | 4.11479500  |
| H  | 0.06400700  | -1.38595500 | 4.73001400  |
| C  | 1.36270700  | 3.52848900  | 3.60407700  |
| N  | 2.67604600  | 3.38568400  | 3.17420700  |
| H  | 3.40714900  | 4.08277300  | 3.26873800  |
| C  | 2.83609300  | 2.18046900  | 2.60571100  |
| H  | 3.75347500  | 1.81098800  | 2.17700800  |
| N  | 1.68155900  | 1.51481300  | 2.65388300  |
| C  | 0.75580300  | 2.34983000  | 3.26435000  |
| H  | -0.26571300 | 2.04762400  | 3.42130700  |
| C  | -0.80410900 | 5.82016400  | -3.45165200 |
| H  | -1.88585400 | 5.64681000  | -3.35580000 |
| H  | -0.49995600 | 5.32092300  | -4.38010300 |
| C  | -0.12948500 | 5.13487800  | -2.26142500 |
| O  | 0.25504300  | 5.75341100  | -1.26939500 |
| N  | 0.00042800  | 3.78477900  | -2.37119800 |
| H  | 0.36681200  | 3.26955500  | -1.58089100 |
| H  | -0.36266800 | 3.24692900  | -3.14997400 |
| C  | 3.40137500  | -1.33310900 | 2.46802500  |
| O  | 2.26313800  | -1.38068100 | 3.07935300  |
| O  | 3.51044300  | -0.54383800 | 1.49083800  |
| C  | -1.93159600 | -0.26047000 | -6.14278400 |
| C  | -2.43396100 | -1.32515700 | -6.88554700 |
| C  | -2.54539500 | -2.59525800 | -6.30902800 |
| C  | -2.15673000 | -2.80767900 | -4.98257400 |
| C  | -1.64877800 | -1.75655400 | -4.22476600 |
| C  | -1.53926500 | -0.49815800 | -4.82210900 |
| N  | -1.00058600 | 0.61033900  | -4.04463300 |
| O  | -0.46175200 | 0.37494900  | -2.95368700 |
| O  | -1.10902300 | 1.75135100  | -4.50174700 |
| H  | -1.83132800 | 0.72888400  | -6.57165000 |
| H  | -2.73488500 | -1.16397400 | -7.91585400 |
| H  | -2.93658500 | -3.42116300 | -6.89579700 |
| H  | -2.24188400 | -3.79047400 | -4.53085800 |
| H  | -1.36242700 | -1.91487100 | -3.19378000 |
| O  | 0.59629500  | 0.70310700  | 0.52783200  |
| O  | 0.94819900  | -1.58479500 | 0.64045200  |
| H  | 1.16077700  | -1.57600900 | -0.38864700 |
| H  | 5.48152500  | -1.84967100 | 2.57776500  |
| H  | 4.49770100  | -2.42564400 | 3.96620800  |
| H  | 4.36700300  | -3.22115800 | 2.38649000  |
| Fe | 1.27303800  | -0.26056400 | 1.76856600  |
| C  | 4.51604600  | -2.25594800 | 2.88653900  |
| H  | -2.85625000 | -7.42309500 | 0.12138000  |
| H  | -1.42267800 | -6.85584500 | 0.98127900  |
| H  | -2.92866100 | -5.90808500 | 1.02497700  |
| C  | 0.84391200  | 4.75725200  | 4.27997300  |
| H  | 1.36495600  | 4.94523800  | 5.22642700  |
| H  | 0.97003900  | 5.64257200  | 3.64574700  |
| H  | -0.22139800 | 4.63914500  | 4.49370400  |

|   |             |             |             |
|---|-------------|-------------|-------------|
| C | -0.52137000 | 7.32215000  | -3.52064300 |
| H | -3.48310000 | -0.80698000 | 6.00373000  |
| H | -3.57505200 | -2.42124500 | 5.28097500  |
| H | -2.20707900 | -1.99406700 | 6.32274000  |
| C | -2.28518200 | -6.52820600 | 0.38930400  |
| H | -1.07936900 | 7.78010900  | -4.34483700 |
| H | -0.81249400 | 7.81536700  | -2.58854800 |
| H | 0.54444400  | 7.51902000  | -3.68209400 |
| C | -2.88737300 | -1.61223800 | 5.55664100  |
| O | 1.14740800  | -1.84970700 | -1.85074400 |
| H | 0.52153900  | -2.62516900 | -1.87420000 |
| H | 0.67713800  | -1.11874800 | -2.29745000 |

NBZ-FeIII-O-C1-TS-model4:

|   |              |             |            |
|---|--------------|-------------|------------|
| C | -30.29114000 | 6.19611900  | 5.43997100 |
| H | -30.82474900 | 6.47784700  | 6.35612000 |
| H | -29.70778200 | 5.29921000  | 5.69215700 |
| C | -29.28776600 | 7.28991200  | 5.08869200 |
| O | -29.04920600 | 7.58222700  | 3.90314400 |
| N | -28.67235200 | 7.88556100  | 6.12807100 |
| H | -27.96363200 | 8.60881200  | 6.00081500 |
| H | -28.89599700 | 7.62195600  | 7.07868500 |
| C | -31.18565900 | 11.04197500 | 7.89188700 |
| N | -31.78532500 | 11.05599700 | 6.64257000 |
| H | -32.76732900 | 10.88487000 | 6.45778400 |
| C | -30.85145100 | 11.34216800 | 5.70967300 |
| H | -31.05563100 | 11.41302800 | 4.65208500 |
| N | -29.67012200 | 11.51441400 | 6.28720900 |
| C | -29.86929700 | 11.32890100 | 7.64564800 |
| H | -29.05795600 | 11.41319600 | 8.35438100 |
| C | -27.74785200 | 15.89598100 | 7.31250100 |
| N | -26.41270400 | 15.71375500 | 6.98682700 |
| H | -25.66349600 | 16.36642200 | 7.18892600 |
| C | -26.26665200 | 14.53397000 | 6.35638400 |
| H | -25.32998900 | 14.13209600 | 6.00363900 |
| N | -27.44741500 | 13.93189300 | 6.25047800 |
| C | -28.37710900 | 14.77452200 | 6.84075000 |
| H | -29.42371300 | 14.51389900 | 6.89331400 |
| C | -29.08290300 | 18.85379800 | 1.40616700 |
| H | -29.74279700 | 19.06819900 | 2.25891700 |
| H | -29.22384100 | 17.79411200 | 1.16464900 |
| C | -27.65056800 | 19.10642700 | 1.87705000 |
| O | -27.14059700 | 20.22527400 | 1.86148900 |
| N | -27.00000300 | 18.01224300 | 2.36047500 |
| H | -26.02720200 | 18.11247700 | 2.62227300 |
| H | -27.36165200 | 17.07404700 | 2.23631900 |
| C | -25.61483300 | 10.67490300 | 5.95193100 |
| O | -26.82099800 | 10.27388000 | 6.21798400 |
| O | -25.45083600 | 11.76065500 | 5.34663800 |

|    |              |             |             |
|----|--------------|-------------|-------------|
| C  | -29.58727400 | 12.82207200 | 1.41215700  |
| C  | -30.16411200 | 11.81263800 | 0.67889500  |
| C  | -29.40437400 | 11.06520800 | -0.24963300 |
| C  | -28.04408100 | 11.36489600 | -0.45714800 |
| C  | -27.43413100 | 12.37633000 | 0.25346700  |
| C  | -28.16984700 | 13.05649300 | 1.29598100  |
| N  | -27.71958300 | 14.46628000 | 1.58618900  |
| O  | -26.55452300 | 14.75063100 | 1.33935600  |
| O  | -28.53785900 | 15.24318900 | 2.08039500  |
| H  | -30.16086400 | 13.42590400 | 2.10344700  |
| H  | -31.22388800 | 11.60555100 | 0.79348600  |
| H  | -29.88115300 | 10.27994100 | -0.82774000 |
| H  | -27.47593900 | 10.81720900 | -1.20271800 |
| H  | -26.39884800 | 12.64855900 | 0.09009600  |
| O  | -27.35345900 | 12.48293700 | 2.76297200  |
| O  | -28.17813300 | 11.56058100 | 3.46180000  |
| H  | -27.79479600 | 10.63988500 | 3.18133700  |
| H  | -23.50912300 | 10.25888900 | 6.08001300  |
| H  | -24.45826500 | 9.83168700  | 7.53159300  |
| H  | -24.56199200 | 8.81254000  | 6.09390700  |
| Fe | -27.72980200 | 11.98851600 | 5.55692200  |
| C  | -24.45600800 | 9.84800200  | 6.43499800  |
| H  | -31.93519600 | 5.05489300  | 4.61202300  |
| H  | -31.89998700 | 6.74228300  | 4.06868700  |
| H  | -30.74571400 | 5.57809800  | 3.40344600  |
| C  | -28.24600000 | 17.09400300 | 8.04400100  |
| H  | -27.76176500 | 17.19623600 | 9.02303200  |
| H  | -28.05874500 | 18.01757800 | 7.48250400  |
| H  | -29.32395200 | 17.01100000 | 8.20693000  |
| C  | -29.46900000 | 19.74099600 | 0.22200100  |
| H  | -32.71973400 | 11.48651100 | 9.33646300  |
| H  | -32.36603900 | 9.76199300  | 9.15932400  |
| H  | -31.22077600 | 10.81750900 | 10.00395700 |
| C  | -31.27499800 | 5.87600100  | 4.31300100  |
| H  | -30.52412200 | 19.60189300 | -0.03862000 |
| H  | -29.30726700 | 20.79538600 | 0.46407600  |
| H  | -28.86804800 | 19.50571500 | -0.66436100 |
| C  | -31.91499800 | 10.76200000 | 9.16099700  |
| O  | -27.23083400 | 9.25592200  | 2.90029600  |
| H  | -27.86624800 | 8.60361900  | 3.31589900  |
| H  | -27.25680900 | 9.06936700  | 1.94644000  |

NBZ-FeIII-O-C2-TS-model4:

|   |              |            |            |
|---|--------------|------------|------------|
| C | -30.36027100 | 6.17333800 | 5.50608000 |
| H | -30.93783800 | 6.55839900 | 6.35459500 |
| H | -29.89045500 | 5.24120700 | 5.85042600 |
| C | -29.22328500 | 7.13449800 | 5.17863500 |
| O | -28.71204800 | 7.15185700 | 4.04433100 |
| N | -28.79698300 | 7.92266200 | 6.18467200 |



|    |              |             |             |
|----|--------------|-------------|-------------|
| H  | -28.01827700 | 8.57304600  | 6.07613200  |
| H  | -29.24317200 | 7.89024500  | 7.09161900  |
| C  | -31.19749500 | 11.04275200 | 7.88352100  |
| N  | -31.82226800 | 11.10556800 | 6.64804500  |
| H  | -32.81386700 | 10.97552000 | 6.48165800  |
| C  | -30.89938900 | 11.38114200 | 5.70130500  |
| H  | -31.12833500 | 11.48470100 | 4.65173600  |
| N  | -29.70003900 | 11.50075000 | 6.25438300  |
| C  | -29.87708700 | 11.29136100 | 7.61375500  |
| H  | -29.04787100 | 11.33165400 | 8.30533700  |
| C  | -27.77169500 | 15.88874100 | 7.30609400  |
| N  | -26.44296900 | 15.69717500 | 6.96117200  |
| H  | -25.68724500 | 16.34700000 | 7.14771200  |
| C  | -26.31340400 | 14.51276300 | 6.33591800  |
| H  | -25.38438400 | 14.10433100 | 5.97042500  |
| N  | -27.49835500 | 13.91533200 | 6.25155000  |
| C  | -28.41450600 | 14.76687500 | 6.85028700  |
| H  | -29.46115100 | 14.51144900 | 6.92391700  |
| C  | -29.13894300 | 18.42719100 | 0.92892500  |
| H  | -29.78754600 | 17.61683400 | 0.57450900  |
| H  | -28.11026800 | 18.12130400 | 0.68870600  |
| C  | -29.23367800 | 18.52983100 | 2.45178600  |
| O  | -29.13199400 | 19.59736000 | 3.05407900  |
| N  | -29.43344800 | 17.34515100 | 3.09299700  |
| H  | -29.37810100 | 17.33574200 | 4.10366800  |
| H  | -29.39695000 | 16.45268800 | 2.61084100  |
| C  | -25.63106500 | 10.66454300 | 5.96857200  |
| O  | -26.82751500 | 10.27165500 | 6.27550500  |
| O  | -25.48193300 | 11.73294300 | 5.32452200  |
| C  | -30.60579300 | 11.57168100 | 1.37459900  |
| C  | -30.38957800 | 10.27131300 | 0.89501900  |
| C  | -29.12886100 | 9.89554000  | 0.39001800  |
| C  | -28.08075900 | 10.79574000 | 0.38372300  |
| C  | -28.22743500 | 12.09539600 | 0.97860300  |
| C  | -29.55586200 | 12.47191100 | 1.36634800  |
| N  | -29.76874500 | 13.81867700 | 1.85295200  |
| O  | -28.82092000 | 14.61582100 | 1.77643900  |
| O  | -30.86970100 | 14.11513600 | 2.32499100  |
| H  | -31.58353400 | 11.88129900 | 1.72366600  |
| H  | -31.21027200 | 9.56126500  | 0.89120400  |
| H  | -28.99416800 | 8.89924600  | -0.02015700 |
| H  | -27.11299500 | 10.52580500 | -0.02608700 |
| H  | -27.54391300 | 12.88324900 | 0.68343500  |
| O  | -27.30751700 | 11.92575400 | 2.56855800  |
| O  | -27.97902400 | 11.07567100 | 3.47125700  |
| H  | -27.48395400 | 10.17802700 | 3.36859900  |
| H  | -23.51564800 | 10.29761100 | 6.11105000  |
| H  | -24.47342200 | 9.77574600  | 7.52857900  |
| H  | -24.53234800 | 8.82922900  | 6.03916500  |
| Fe | -27.74795900 | 11.95844700 | 5.51026100  |

|   |              |             |             |
|---|--------------|-------------|-------------|
| C | -24.45600500 | 9.84800300  | 6.43499900  |
| H | -32.02449200 | 5.12751800  | 4.59022900  |
| H | -31.80248900 | 6.77740700  | 3.97983100  |
| H | -30.69758800 | 5.49125600  | 3.46773800  |
| C | -28.24600000 | 17.09400100 | 8.04400100  |
| H | -27.74808800 | 17.18817300 | 9.01694800  |
| H | -28.05250800 | 18.01557300 | 7.48144000  |
| H | -29.32286200 | 17.02576900 | 8.22050300  |
| C | -29.46900000 | 19.74099700 | 0.22200100  |
| H | -32.67041400 | 11.52720300 | 9.37825200  |
| H | -32.42625700 | 9.79190400  | 9.13584500  |
| H | -31.20118000 | 10.74795000 | 9.98912300  |
| C | -31.27500000 | 5.87600000  | 4.31300000  |
| H | -29.31769200 | 19.64573500 | -0.85902100 |
| H | -30.51075500 | 20.03489400 | 0.39383400  |
| H | -28.83154700 | 20.54993100 | 0.59073600  |
| C | -31.91499900 | 10.76200000 | 9.16099800  |
| O | -26.76138500 | 8.81597000  | 3.30224600  |
| H | -27.44485700 | 8.14875700  | 3.60209300  |
| H | -26.55813500 | 8.58332500  | 2.38070700  |

NBZ-FeIII-O1-C2-TS-model4:

|   |              |             |             |
|---|--------------|-------------|-------------|
| C | -0.08015300  | -0.02242800 | 0.12986400  |
| H | -0.24294500  | -0.05281400 | 1.21323100  |
| H | 1.00816900   | -0.02316300 | -0.02331200 |
| C | -0.59180400  | 1.29940600  | -0.43062300 |
| O | -0.81598300  | 1.42871800  | -1.65116900 |
| N | -0.74699700  | 2.30480600  | 0.44745700  |
| H | -1.06921300  | 3.23268000  | 0.16498600  |
| H | -0.56505200  | 2.15924600  | 1.43155700  |
| C | -4.96211700  | 2.37608900  | 3.00081400  |
| N | -5.71446200  | 1.77801300  | 2.00318600  |
| H | -6.28256600  | 0.94600500  | 2.11579200  |
| C | -5.56879000  | 2.47831200  | 0.86010400  |
| H | -6.05241900  | 2.22664600  | -0.07087300 |
| N | -4.75382600  | 3.50583100  | 1.06020100  |
| C | -4.36631700  | 3.44897800  | 2.38930500  |
| H | -3.68923200  | 4.17682100  | 2.81248200  |
| C | -7.88260000  | 7.15557400  | 1.21277700  |
| N | -8.06704100  | 7.27514200  | -0.15531400 |
| H | -8.83784100  | 7.75010800  | -0.61167600 |
| C | -7.05729600  | 6.64508800  | -0.79106700 |
| H | -6.96550200  | 6.58401100  | -1.86439700 |
| N | -6.21975300  | 6.12033800  | 0.09236900  |
| C | -6.72423800  | 6.43433400  | 1.34327900  |
| H | -6.22907600  | 6.11929700  | 2.25044500  |
| C | -11.18453900 | 6.23728700  | -4.17451100 |
| H | -11.46550900 | 6.22564900  | -3.11145900 |
| H | -10.70071400 | 5.27444300  | -4.37511400 |

|    |              |             |             |
|----|--------------|-------------|-------------|
| C  | -10.18450700 | 7.37858400  | -4.36210900 |
| O  | -10.53646000 | 8.52901700  | -4.61270500 |
| N  | -8.87534400  | 7.03982900  | -4.17215000 |
| H  | -8.17720500  | 7.73681500  | -4.40304900 |
| H  | -8.57240800  | 6.07082800  | -4.15824800 |
| C  | -2.07600000  | 6.21834000  | -0.08276100 |
| O  | -2.05122600  | 4.96201900  | 0.06309000  |
| O  | -3.20564100  | 6.80243400  | -0.26507700 |
| C  | -6.92540800  | 1.59977400  | -3.50355900 |
| C  | -6.26235000  | 0.36251300  | -3.43597600 |
| C  | -4.88256500  | 0.27230200  | -3.73354700 |
| C  | -4.15017500  | 1.39811200  | -4.02284000 |
| C  | -4.75341400  | 2.72823300  | -3.92174700 |
| C  | -6.20697000  | 2.73851100  | -3.80618700 |
| N  | -6.89964900  | 3.98262000  | -4.03063600 |
| O  | -6.28732200  | 4.91507100  | -4.55784700 |
| O  | -8.09815800  | 4.05037300  | -3.70850600 |
| H  | -7.99912700  | 1.66040500  | -3.37075000 |
| H  | -6.82981700  | -0.53359000 | -3.20798400 |
| H  | -4.40684400  | -0.70316800 | -3.76186600 |
| H  | -3.09658700  | 1.33046800  | -4.27130000 |
| H  | -4.33561300  | 3.51094400  | -4.54865100 |
| O  | -4.81047300  | 4.51965900  | -2.02082500 |
| O  | -4.18164600  | 3.24411700  | -2.40330000 |
| H  | -3.14873700  | 3.47098400  | -2.58562600 |
| H  | -0.93486600  | 7.83781300  | 0.72779100  |
| H  | 0.05797800   | 6.46856200  | 0.14385400  |
| H  | -0.72321700  | 7.59039500  | -1.00680000 |
| Fe | -4.35752800  | 5.11488900  | -0.24486300 |
| C  | -0.83214800  | 7.07124100  | -0.04796700 |
| H  | -0.23132700  | -2.16861700 | -0.14134200 |
| H  | -1.77025400  | -1.31658300 | -0.36453800 |
| H  | -0.52385200  | -1.23595700 | -1.62298400 |
| C  | -8.81359200  | 7.73673200  | 2.22240700  |
| H  | -8.88266300  | 8.82733900  | 2.12700700  |
| H  | -9.82775700  | 7.33067800  | 2.12173800  |
| H  | -8.45663600  | 7.50872800  | 3.23049900  |
| C  | -12.43658200 | 6.41063000  | -5.03547900 |
| H  | -5.91526600  | 1.86913700  | 4.85972400  |
| H  | -4.53903800  | 0.83576100  | 4.44413400  |
| H  | -4.26418000  | 2.49320100  | 5.00814400  |
| C  | -0.69009900  | -1.25885500 | -0.54210100 |
| H  | -13.16649800 | 5.62303500  | -4.81823900 |
| H  | -12.90452900 | 7.38064100  | -4.84412300 |
| H  | -12.19447900 | 6.36261300  | -6.10350200 |
| C  | -4.91942600  | 1.86375100  | 4.39989200  |
| O  | -1.74101500  | 3.62290800  | -2.78023600 |
| H  | -1.31822700  | 2.82193000  | -2.33022400 |
| H  | -1.45782900  | 3.59930300  | -3.71101300 |

NBZ-FeV-O-C1-TS-model4:

|   |              |             |            |
|---|--------------|-------------|------------|
| C | -30.41444100 | 6.18041100  | 5.54563900 |
| H | -31.03176100 | 6.57074300  | 6.36311800 |
| H | -29.96350900 | 5.24889500  | 5.91570500 |
| C | -29.25821300 | 7.13656300  | 5.27135000 |
| O | -28.65144900 | 7.11854400  | 4.18651400 |
| N | -28.91897400 | 7.96456700  | 6.28171600 |
| H | -28.14559800 | 8.61977400  | 6.20124100 |
| H | -29.42309800 | 7.95498300  | 7.15799200 |
| C | -31.12597200 | 11.13725600 | 7.94874300 |
| N | -31.67648100 | 11.16167000 | 6.67717900 |
| H | -32.64145700 | 10.95185600 | 6.44839900 |
| C | -30.72128900 | 11.51095500 | 5.79039500 |
| H | -30.88161500 | 11.58246500 | 4.72631200 |
| N | -29.57442200 | 11.72527500 | 6.41936900 |
| C | -29.81246800 | 11.49419700 | 7.76350300 |
| H | -29.03088200 | 11.59914400 | 8.50127100 |
| C | -27.72231700 | 15.76984200 | 7.57068600 |
| N | -26.37670700 | 15.42747300 | 7.62323000 |
| H | -25.63457500 | 16.00891400 | 7.99642700 |
| C | -26.20569700 | 14.19916300 | 7.09981700 |
| H | -25.25356900 | 13.70645100 | 6.98497000 |
| N | -27.37984100 | 13.70583700 | 6.71660000 |
| C | -28.32983300 | 14.67903000 | 7.00312900 |
| H | -29.37298200 | 14.53299400 | 6.77192700 |
| C | -28.38255500 | 18.84576700 | 0.81466800 |
| H | -28.82360400 | 17.99859400 | 1.35311600 |
| H | -27.77201100 | 18.41446300 | 0.00797900 |
| C | -27.43029800 | 19.60153700 | 1.74172100 |
| O | -27.23257300 | 20.81143900 | 1.65070600 |
| N | -26.80900400 | 18.82619100 | 2.67342100 |
| H | -26.07234100 | 19.24120700 | 3.22967000 |
| H | -26.90169300 | 17.81661700 | 2.68101500 |
| C | -25.63246700 | 10.74982000 | 6.14289700 |
| O | -26.79486900 | 10.50531400 | 6.61689400 |
| O | -25.50648400 | 11.75799700 | 5.37625600 |
| C | -29.44523700 | 13.25220100 | 2.20367700 |
| C | -29.61052600 | 11.98148100 | 1.69990800 |
| C | -28.48655400 | 11.22664900 | 1.31346100 |
| C | -27.19087100 | 11.77905100 | 1.35508500 |
| C | -26.99734800 | 13.04860500 | 1.85098400 |
| C | -28.11934600 | 13.74732200 | 2.38432600 |
| N | -27.97402700 | 15.21429500 | 2.59686800 |
| O | -26.84782500 | 15.69798500 | 2.47391200 |
| O | -28.97930900 | 15.85515100 | 2.88081400 |
| H | -30.28284700 | 13.87192300 | 2.49737600 |
| H | -30.60610400 | 11.56311800 | 1.59410200 |
| H | -28.62680500 | 10.22335400 | 0.92268300 |
| H | -26.34467900 | 11.20593200 | 0.99066700 |

|    |              |             |             |
|----|--------------|-------------|-------------|
| H  | -26.01847900 | 13.50877800 | 1.88939300  |
| O  | -27.88556000 | 13.45935900 | 4.26854600  |
| O  | -28.06026800 | 10.88639600 | 4.13802300  |
| H  | -27.37076300 | 10.15869300 | 4.00003600  |
| H  | -23.51525000 | 10.38328300 | 6.28966700  |
| H  | -24.51659100 | 9.44881600  | 7.45102700  |
| H  | -24.50248000 | 9.00873300  | 5.73094100  |
| Fe | -27.66788800 | 12.07435500 | 5.39776700  |
| C  | -24.45600700 | 9.84800700  | 6.43499900  |
| H  | -32.03597200 | 5.12921100  | 4.56157400  |
| H  | -31.78657100 | 6.77533600  | 3.95084200  |
| H  | -30.65985200 | 5.48543800  | 3.49731700  |
| C  | -28.24599900 | 17.09400000 | 8.04400000  |
| H  | -28.05407100 | 17.24424200 | 9.11325000  |
| H  | -27.77730800 | 17.92163600 | 7.49848500  |
| H  | -29.32539400 | 17.14575900 | 7.87928100  |
| C  | -29.46899900 | 19.74099400 | 0.22200200  |
| H  | -32.75464000 | 11.44815600 | 9.32655300  |
| H  | -32.32639800 | 9.74870000  | 9.07513600  |
| H  | -31.27515400 | 10.79287200 | 10.04715600 |
| C  | -31.27500000 | 5.87600000  | 4.31300000  |
| H  | -30.08577000 | 19.18098700 | -0.48989000 |
| H  | -30.12871200 | 20.13577400 | 1.00331100  |
| H  | -29.02655700 | 20.59427800 | -0.30041100 |
| C  | -31.91499600 | 10.76200000 | 9.16099600  |
| O  | -26.52592400 | 8.75326900  | 3.85821900  |
| H  | -27.26848400 | 8.09278600  | 3.95638200  |
| H  | -26.17387600 | 8.61976100  | 2.96239100  |

NBZ-FeV-O-C2-TS-model4:

|   |             |             |             |
|---|-------------|-------------|-------------|
| C | -1.55564900 | -5.96214900 | -0.83075600 |
| H | -0.86468100 | -6.70970400 | -1.24144900 |
| H | -2.26496200 | -5.74320500 | -1.63753400 |
| C | -0.73513100 | -4.69429600 | -0.63799100 |
| O | -0.23452000 | -4.13324100 | -1.63348600 |
| N | -0.58028800 | -4.22277700 | 0.61120100  |
| H | -0.02696400 | -3.37997100 | 0.77749300  |
| H | -0.95977600 | -4.70942600 | 1.41130200  |
| C | -2.12147200 | -1.13803800 | 4.36848200  |
| N | -2.74145500 | -0.60803000 | 3.24831300  |
| H | -3.74163400 | -0.49343300 | 3.12913000  |
| C | -1.80076200 | -0.26349200 | 2.34600600  |
| H | -2.00731900 | 0.17427300  | 1.38190400  |
| N | -0.59470700 | -0.54159600 | 2.82523100  |
| C | -0.77992000 | -1.09028300 | 4.08139300  |
| H | 0.05690900  | -1.41126400 | 4.68322900  |
| C | 1.34399100  | 3.51014100  | 3.61960800  |
| N | 2.65515000  | 3.35206100  | 3.18930700  |
| H | 3.39463300  | 4.03974800  | 3.28366600  |

|    |             |             |             |
|----|-------------|-------------|-------------|
| C  | 2.80029300  | 2.13755400  | 2.63213000  |
| H  | 3.71430700  | 1.75555600  | 2.20711400  |
| N  | 1.64145300  | 1.48274200  | 2.68150200  |
| C  | 0.72830000  | 2.33052600  | 3.29115800  |
| H  | -0.29559700 | 2.03857900  | 3.45510600  |
| C  | 0.70907100  | 6.62461300  | -4.11729200 |
| H  | 0.63111400  | 5.54030400  | -3.98878200 |
| H  | 0.75695400  | 6.82781200  | -5.19386300 |
| C  | 2.00233200  | 7.15756700  | -3.50473900 |
| O  | 2.36658200  | 8.32041700  | -3.67025900 |
| N  | 2.72256000  | 6.25746300  | -2.77793700 |
| H  | 3.52768900  | 6.60013400  | -2.26785900 |
| H  | 2.32272000  | 5.37156300  | -2.48801800 |
| C  | 3.38252400  | -1.33583700 | 2.50714400  |
| O  | 2.27668600  | -1.36704200 | 3.15606300  |
| O  | 3.46404500  | -0.57035000 | 1.50001200  |
| C  | -1.30903700 | 2.34001900  | -1.89792300 |
| C  | -2.36987900 | 1.41676800  | -1.84321400 |
| C  | -2.11812500 | 0.05366800  | -1.63555200 |
| C  | -0.81737100 | -0.40045100 | -1.45800200 |
| C  | 0.27612800  | 0.51451200  | -1.44555400 |
| C  | -0.01885800 | 1.87863800  | -1.73999000 |
| N  | 1.09143700  | 2.81823400  | -1.81180200 |
| O  | 2.23654500  | 2.37245800  | -1.79694700 |
| O  | 0.81888600  | 4.02421300  | -1.88507800 |
| H  | -1.49543900 | 3.39134200  | -2.07876800 |
| H  | -3.38654400 | 1.77064300  | -1.98046900 |
| H  | -2.94198500 | -0.65333400 | -1.63283100 |
| H  | -0.61404100 | -1.45576100 | -1.31953400 |
| H  | 1.28402000  | 0.15422000  | -1.59866100 |
| O  | 0.65663600  | 0.79102700  | 0.46865100  |
| O  | 1.04175300  | -1.76920900 | 0.76083100  |
| H  | 1.55834700  | -1.90002000 | -0.09425300 |
| H  | 5.47441200  | -1.82805100 | 2.58356800  |
| H  | 4.51079600  | -2.46311100 | 3.95963500  |
| H  | 4.37588600  | -3.20385200 | 2.35201300  |
| Fe | 1.24974800  | -0.30164900 | 1.71605500  |
| C  | 4.51604300  | -2.25594600 | 2.88653900  |
| H  | -2.84959300 | -7.42219700 | 0.10402200  |
| H  | -1.58738900 | -6.82543000 | 1.18168500  |
| H  | -2.99824800 | -5.80822300 | 0.80825700  |
| C  | 0.84391200  | 4.75725100  | 4.27997300  |
| H  | 1.36955000  | 4.95129900  | 5.22274700  |
| H  | 0.98208700  | 5.63237300  | 3.63391800  |
| H  | -0.22260200 | 4.65926900  | 4.49864600  |
| C  | -0.52137000 | 7.32215000  | -3.52064300 |
| H  | -3.47090300 | -0.80142000 | 6.00975500  |
| H  | -3.58450700 | -2.41688000 | 5.29219000  |
| H  | -2.19963700 | -1.99737500 | 6.31438300  |
| C  | -2.28518200 | -6.52820600 | 0.38930400  |

|   |             |             |             |
|---|-------------|-------------|-------------|
| H | -0.44536400 | 8.40716000  | -3.64570900 |
| H | -1.43759300 | 6.98398900  | -4.01770600 |
| H | -0.61865800 | 7.10938300  | -2.44928200 |
| C | -2.88737100 | -1.61223800 | 5.55664000  |
| O | 2.03200800  | -2.64495200 | -1.49258200 |
| H | 1.23200000  | -3.22246800 | -1.61977800 |
| H | 2.14622000  | -2.15801100 | -2.32498400 |

NBZ-FeV-O1-C2-TS-model4:

|   |              |             |            |
|---|--------------|-------------|------------|
| C | -30.56562000 | 6.29053700  | 5.60704200 |
| H | -31.24155300 | 6.85972100  | 6.25566500 |
| H | -30.27695400 | 5.39260100  | 6.17117200 |
| C | -29.28421700 | 7.08158100  | 5.37276600 |
| O | -28.52720400 | 6.81327400  | 4.42343800 |
| N | -29.00929700 | 8.04777300  | 6.27331100 |
| H | -28.17353700 | 8.62077900  | 6.20412700 |
| H | -29.66247600 | 8.28044600  | 7.00861300 |
| C | -31.11050500 | 11.17629100 | 7.97188300 |
| N | -31.69115600 | 11.68863500 | 6.82184000 |
| H | -32.68488300 | 11.82831100 | 6.67693300 |
| C | -30.72247500 | 11.99010000 | 5.93401400 |
| H | -30.89535700 | 12.42245200 | 4.96099100 |
| N | -29.53455700 | 11.69493800 | 6.44580600 |
| C | -29.76107200 | 11.18469800 | 7.71301000 |
| H | -28.94597100 | 10.87266500 | 8.34884700 |
| C | -27.67866700 | 15.77846000 | 7.59348400 |
| N | -26.33421300 | 15.44620900 | 7.69589400 |
| H | -25.60640500 | 16.03763500 | 8.08060300 |
| C | -26.13889400 | 14.21282900 | 7.18369900 |
| H | -25.17819000 | 13.72884200 | 7.10876800 |
| N | -27.29218700 | 13.71264600 | 6.75965500 |
| C | -28.25509400 | 14.68099900 | 7.00724000 |
| H | -29.28707100 | 14.53095700 | 6.73386600 |
| C | -29.15125200 | 18.44505600 | 0.97032400 |
| H | -29.81872600 | 18.34268800 | 1.83835800 |
| H | -29.33950600 | 17.56926500 | 0.33719800 |
| C | -27.71642400 | 18.40038500 | 1.49881900 |
| O | -27.06253500 | 19.41892000 | 1.71889400 |
| N | -27.21952900 | 17.15385000 | 1.72519600 |
| H | -26.30416500 | 17.07299000 | 2.14946600 |
| H | -27.75742700 | 16.30244400 | 1.60414700 |
| C | -25.58188700 | 10.80235600 | 6.08705800 |
| O | -26.77173000 | 10.60657700 | 6.55813400 |
| O | -25.41805800 | 11.78235600 | 5.30922500 |
| C | -29.80965000 | 11.95395200 | 1.25316600 |
| C | -30.31664500 | 10.65397600 | 1.05311800 |
| C | -29.50568100 | 9.53243900  | 1.26328600 |
| C | -28.20365100 | 9.69419000  | 1.71403300 |
| C | -27.68952900 | 10.99156800 | 2.02070100 |

|    |              |             |             |
|----|--------------|-------------|-------------|
| C  | -28.51130600 | 12.10512600 | 1.69282400  |
| N  | -27.93931300 | 13.45131400 | 1.75148400  |
| O  | -26.73194600 | 13.56056800 | 1.93954700  |
| O  | -28.70495400 | 14.40393800 | 1.56767200  |
| H  | -30.41284700 | 12.82456300 | 1.02764400  |
| H  | -31.33684800 | 10.53437700 | 0.70282900  |
| H  | -29.89146900 | 8.53759000  | 1.06651800  |
| H  | -27.57283100 | 8.83294700  | 1.89597500  |
| H  | -26.62650000 | 11.14836400 | 2.14925600  |
| O  | -28.33684100 | 13.16667600 | 4.44807300  |
| O  | -27.87234000 | 10.65703600 | 4.07871200  |
| H  | -27.19981200 | 9.91838300  | 4.10144200  |
| H  | -23.49817600 | 10.25047800 | 6.09957500  |
| H  | -24.43283700 | 9.66633200  | 7.51438600  |
| H  | -24.65580100 | 8.89524300  | 5.93392100  |
| Fe | -27.67620800 | 12.08135000 | 5.46515300  |
| C  | -24.45600400 | 9.84800300  | 6.43500000  |
| H  | -32.14898600 | 5.25801700  | 4.54309200  |
| H  | -31.61678500 | 6.75117600  | 3.74813300  |
| H  | -30.60349500 | 5.29900800  | 3.67067500  |
| C  | -28.24600000 | 17.09400000 | 8.04400000  |
| H  | -28.08744400 | 17.25568100 | 9.11707500  |
| H  | -27.78378100 | 17.93069300 | 7.50668700  |
| H  | -29.32159100 | 17.11676500 | 7.84980300  |
| C  | -29.46900000 | 19.74099900 | 0.22200000  |
| H  | -32.47815500 | 11.60601600 | 9.57734300  |
| H  | -32.63517900 | 9.97476900  | 8.90649800  |
| H  | -31.25489800 | 10.37802100 | 9.94354600  |
| C  | -31.27500000 | 5.87600000  | 4.31300000  |
| H  | -30.52497900 | 19.76854600 | -0.06921700 |
| H  | -29.25852200 | 20.61122400 | 0.85024400  |
| H  | -28.86412900 | 19.83346900 | -0.68733600 |
| C  | -31.91499900 | 10.76200000 | 9.16099800  |
| O  | -26.37171500 | 8.40329500  | 4.15729000  |
| H  | -27.10919300 | 7.73404400  | 4.22354200  |
| H  | -25.76493600 | 8.08153800  | 3.47073700  |

**FeV-O1-C2 pathway (radical cis-dihydroxylation pathway)**

***Nitrobenzene Model 1***

NBZ-FeV-O1-C2-TS1-modell1:

|   |              |             |            |
|---|--------------|-------------|------------|
| C | -31.09526800 | 11.17369800 | 7.98385400 |
| N | -31.64832300 | 11.78628300 | 6.86830100 |
| H | -32.63132600 | 12.00304900 | 6.74435100 |
| C | -30.67383700 | 12.06068700 | 5.98284400 |
| H | -30.82301400 | 12.55242100 | 5.03415700 |
| N | -29.50342600 | 11.65172900 | 6.46731700 |
| C | -29.75326100 | 11.09401300 | 7.71017100 |



|    |              |             |            |
|----|--------------|-------------|------------|
| H  | -28.95783500 | 10.68284100 | 8.31299100 |
| C  | -27.67196200 | 15.80435400 | 7.54310800 |
| N  | -26.32682100 | 15.47888800 | 7.63332300 |
| H  | -25.60148000 | 16.06701800 | 8.02777100 |
| C  | -26.12913100 | 14.25464800 | 7.10233600 |
| H  | -25.16722000 | 13.77218700 | 7.02936200 |
| N  | -27.28199800 | 13.75912100 | 6.67316100 |
| C  | -28.24732900 | 14.71763900 | 6.93608100 |
| H  | -29.28192600 | 14.56820600 | 6.67140500 |
| C  | -25.59485100 | 10.79845300 | 6.17660900 |
| O  | -26.63000800 | 10.82062700 | 6.92808400 |
| O  | -25.59911400 | 11.57521400 | 5.16333300 |
| H  | -24.74737200 | 8.85109000  | 6.08202300 |
| H  | -23.55891800 | 10.16644200 | 5.89989200 |
| H  | -24.25551600 | 9.77557900  | 7.50790400 |
| C  | -24.45600700 | 9.84800700  | 6.43500100 |
| C  | -28.24599800 | 17.09399600 | 8.04400000 |
| H  | -28.08633300 | 17.21293400 | 9.12254500 |
| H  | -27.79243300 | 17.95671100 | 7.54138700 |
| H  | -29.32234900 | 17.11721700 | 7.85383700 |
| H  | -32.41227600 | 11.62355800 | 9.62295700 |
| H  | -32.69138100 | 10.04089800 | 8.87814500 |
| H  | -31.27636700 | 10.29443400 | 9.91504500 |
| C  | -31.91499800 | 10.76200100 | 9.16099800 |
| Fe | -27.64351100 | 11.98395200 | 5.57940900 |
| O  | -28.26984100 | 12.83158300 | 4.34564600 |
| C  | -26.94711000 | 9.89683400  | 2.73652900 |
| C  | -26.99351000 | 8.47300600  | 2.80369000 |
| C  | -27.79239700 | 10.53328500 | 1.78883900 |
| H  | -26.12413500 | 10.44830700 | 3.17180100 |
| C  | -27.90533900 | 7.75828700  | 2.04114300 |
| H  | -26.32421000 | 7.96553400  | 3.48947300 |
| C  | -28.71990200 | 9.83343200  | 1.04181000 |
| N  | -27.63511700 | 11.97506700 | 1.55529100 |
| C  | -28.77700800 | 8.43326600  | 1.17369100 |
| H  | -27.94484800 | 6.67623700  | 2.11224800 |
| H  | -29.36405200 | 10.35461600 | 0.34395900 |
| O  | -26.57467500 | 12.48929000 | 1.90167400 |
| O  | -28.55854700 | 12.56716100 | 0.99788600 |
| H  | -29.49482800 | 7.87611000  | 0.58017500 |
| O  | -27.93400300 | 10.10949800 | 4.59814100 |
| H  | -28.84258100 | 10.11983600 | 4.23792500 |

NBZ-FeV-O1-C2-INT1-modell (radical intermediate):

|   |              |             |            |
|---|--------------|-------------|------------|
| C | -31.08487100 | 11.15129000 | 7.98530300 |
| N | -31.60474100 | 11.83791300 | 6.89696300 |
| H | -32.57269400 | 12.12184900 | 6.79032500 |
| C | -30.62458300 | 12.08132600 | 6.01248300 |
| H | -30.74845000 | 12.60870500 | 5.08002200 |

|    |              |             |            |
|----|--------------|-------------|------------|
| N  | -29.48200700 | 11.57475000 | 6.46910200 |
| C  | -29.75484200 | 10.99160400 | 7.69738400 |
| H  | -28.98251600 | 10.51412500 | 8.28048700 |
| C  | -27.76751300 | 15.71363600 | 7.72637000 |
| N  | -26.94377400 | 14.98274900 | 8.57114900 |
| H  | -26.55698100 | 15.31228100 | 9.44883800 |
| C  | -26.71802900 | 13.76965800 | 8.03181800 |
| H  | -26.11950700 | 12.99807600 | 8.49025600 |
| N  | -27.35454100 | 13.67050200 | 6.86962800 |
| C  | -28.00401000 | 14.87762900 | 6.66579800 |
| H  | -28.59025100 | 15.05742000 | 5.77771700 |
| C  | -25.63545100 | 10.74548000 | 6.22625800 |
| O  | -26.62863700 | 10.77245900 | 7.03318500 |
| O  | -25.73319400 | 11.49359500 | 5.18911000 |
| H  | -24.62376900 | 8.92776000  | 5.86101200 |
| H  | -23.54490300 | 10.32100500 | 6.05948100 |
| H  | -24.34990500 | 9.58753000  | 7.49045500 |
| C  | -24.45600500 | 9.84800500  | 6.43500000 |
| C  | -28.24599900 | 17.09399900 | 8.04400000 |
| H  | -28.81947800 | 17.11201800 | 8.97870100 |
| H  | -27.41085500 | 17.79696100 | 8.15058300 |
| H  | -28.89246800 | 17.45617100 | 7.24027100 |
| H  | -32.33762500 | 11.64305000 | 9.65912100 |
| H  | -32.74848200 | 10.11172100 | 8.86957500 |
| H  | -31.30215700 | 10.22282200 | 9.88816100 |
| C  | -31.91499900 | 10.76200000 | 9.16099800 |
| Fe | -27.65304400 | 11.93676600 | 5.71022400 |
| O  | -28.21161200 | 12.76620300 | 4.43242100 |
| C  | -28.59194200 | 9.06584800  | 3.62961400 |
| C  | -29.52423900 | 8.33994300  | 4.54910400 |
| C  | -29.32390400 | 9.86002700  | 2.58072300 |
| H  | -27.98164600 | 8.30401100  | 3.10988500 |
| C  | -30.86852400 | 8.28212600  | 4.33003400 |
| H  | -29.05998100 | 7.81836200  | 5.38073000 |
| C  | -30.68642900 | 9.78982700  | 2.39770000 |
| N  | -28.51977800 | 10.62276400 | 1.67616100 |
| C  | -31.46748500 | 8.99326000  | 3.25085100 |
| H  | -31.50082600 | 7.70053300  | 4.99431700 |
| H  | -31.14380400 | 10.34731700 | 1.58802900 |
| O  | -27.27840400 | 10.57078200 | 1.83453100 |
| O  | -29.05936400 | 11.28675700 | 0.78611100 |
| H  | -32.53893200 | 8.93504400  | 3.09105800 |
| O  | -27.66306900 | 9.85641500  | 4.40548100 |
| H  | -27.02268900 | 10.19261500 | 3.74343200 |

NBZ-FeV-O1-C2-TS2-modell1:

|   |              |             |            |
|---|--------------|-------------|------------|
| C | -31.10222300 | 11.12389100 | 7.96360300 |
| N | -31.64401800 | 11.76990100 | 6.86125700 |
| H | -32.61770800 | 12.03279400 | 6.75468100 |

|    |              |             |            |
|----|--------------|-------------|------------|
| C  | -30.67486500 | 12.00068000 | 5.96043300 |
| H  | -30.81484300 | 12.50374500 | 5.01718000 |
| N  | -29.51860500 | 11.52791300 | 6.41722300 |
| C  | -29.77277000 | 10.97568300 | 7.66427800 |
| H  | -28.98888400 | 10.52142500 | 8.25062100 |
| C  | -27.77925600 | 15.71938500 | 7.69802200 |
| N  | -26.93974800 | 14.97496100 | 8.51444400 |
| H  | -26.53497600 | 15.29045800 | 9.38924700 |
| C  | -26.72823600 | 13.77044800 | 7.95358300 |
| H  | -26.12042400 | 12.99168100 | 8.38726500 |
| N  | -27.39053900 | 13.69102200 | 6.80353100 |
| C  | -28.04225300 | 14.90149500 | 6.63078500 |
| H  | -28.64722400 | 15.09435000 | 5.75822000 |
| C  | -25.65858700 | 10.70857400 | 6.18626400 |
| O  | -26.69639000 | 10.66256000 | 6.92762600 |
| O  | -25.70058700 | 11.50364400 | 5.18212400 |
| H  | -23.54025600 | 10.42131700 | 6.26380800 |
| H  | -24.47047800 | 9.44243100  | 7.44870100 |
| H  | -24.46676200 | 9.01674500  | 5.71908900 |
| C  | -24.45600600 | 9.84800600  | 6.43500100 |
| C  | -28.24599900 | 17.09399700 | 8.04399900 |
| H  | -28.80812100 | 17.10006700 | 8.98574600 |
| H  | -27.40640200 | 17.79145600 | 8.15176500 |
| H  | -28.90059000 | 17.47273200 | 7.25462100 |
| H  | -32.34002100 | 11.65352400 | 9.63816000 |
| H  | -32.74549100 | 10.09552300 | 8.89902600 |
| H  | -31.28870100 | 10.24980200 | 9.89621600 |
| C  | -31.91499800 | 10.76200000 | 9.16099800 |
| C  | -29.56788100 | 12.19160800 | 1.48249200 |
| C  | -30.74213300 | 11.43630700 | 1.54379500 |
| C  | -30.76533400 | 10.15437900 | 2.17001600 |
| C  | -29.62875600 | 9.61526100  | 2.68910000 |
| C  | -28.29229800 | 10.27368800 | 2.54546500 |
| C  | -28.40129100 | 11.69239600 | 2.03065300 |
| N  | -27.15920300 | 12.39069200 | 1.80107300 |
| O  | -26.11449500 | 11.78275100 | 2.10091300 |
| O  | -27.17941900 | 13.52156900 | 1.31257600 |
| H  | -29.55906300 | 13.16782600 | 1.01178400 |
| H  | -31.65412600 | 11.84140100 | 1.11723600 |
| H  | -31.70614500 | 9.61703000  | 2.23940900 |
| H  | -29.62820700 | 8.64830800  | 3.18321700 |
| H  | -27.75863200 | 9.71326600  | 1.74943200 |
| O  | -28.25395600 | 12.73872300 | 4.27899900 |
| O  | -27.55480600 | 10.10701600 | 3.75811300 |
| H  | -26.66521800 | 10.47907700 | 3.58240400 |
| Fe | -27.67736100 | 11.99361300 | 5.64038900 |

NBZ-FeV-O1-C2-PC-modell (diol):

|   |              |             |            |
|---|--------------|-------------|------------|
| C | -31.11441200 | 11.14095700 | 7.96088000 |
|---|--------------|-------------|------------|

|    |              |             |            |
|----|--------------|-------------|------------|
| N  | -31.67248800 | 11.78142100 | 6.86339000 |
| H  | -32.65144700 | 12.02545400 | 6.75985800 |
| C  | -30.71194400 | 12.02818600 | 5.95760000 |
| H  | -30.87262000 | 12.51761400 | 5.01011300 |
| N  | -29.54334200 | 11.57425100 | 6.40660900 |
| C  | -29.78473000 | 11.01516600 | 7.65290700 |
| H  | -28.99055600 | 10.57174300 | 8.23378600 |
| C  | -27.77992600 | 15.72082900 | 7.68976100 |
| N  | -26.93525800 | 14.97259700 | 8.49805600 |
| H  | -26.52853400 | 15.28324200 | 9.37386100 |
| C  | -26.72181800 | 13.77329600 | 7.92921500 |
| H  | -26.10957800 | 12.99361000 | 8.35574200 |
| N  | -27.38861700 | 13.69848100 | 6.78052700 |
| C  | -28.04577500 | 14.90935900 | 6.61873700 |
| H  | -28.65238600 | 15.10866600 | 5.74879600 |
| C  | -25.65736700 | 10.70656200 | 6.16533100 |
| O  | -26.74243400 | 10.58036600 | 6.82272800 |
| O  | -25.64640900 | 11.57178900 | 5.21966900 |
| H  | -23.53684800 | 10.41915800 | 6.28036900 |
| H  | -24.49047400 | 9.43964100  | 7.44723200 |
| H  | -24.45802300 | 9.01430300  | 5.72135100 |
| C  | -24.45600600 | 9.84800600  | 6.43500100 |
| C  | -28.24599900 | 17.09399700 | 8.04399900 |
| H  | -28.80397900 | 17.09474300 | 8.98810400 |
| H  | -27.40576200 | 17.79058600 | 8.15147200 |
| H  | -28.90403500 | 17.47569500 | 7.25904600 |
| H  | -32.35039200 | 11.64487600 | 9.64493200 |
| H  | -32.73741300 | 10.08519300 | 8.90006700 |
| H  | -31.27750100 | 10.25510300 | 9.89019300 |
| C  | -31.91499800 | 10.76200000 | 9.16099800 |
| C  | -29.48266700 | 13.16887300 | 2.02665400 |
| C  | -30.65185200 | 12.53439500 | 1.83048000 |
| C  | -30.87928400 | 11.16096900 | 2.28578300 |
| C  | -29.87484900 | 10.42528700 | 2.78731100 |
| C  | -28.46582100 | 10.93928400 | 2.76128700 |
| C  | -28.37233100 | 12.48750100 | 2.77772700 |
| N  | -26.98279400 | 12.86896600 | 2.09785800 |
| O  | -26.10103500 | 12.00884700 | 2.09930600 |
| O  | -26.84439200 | 14.01225500 | 1.69414700 |
| H  | -29.33007300 | 14.20800200 | 1.75865900 |
| H  | -31.47437600 | 13.06000100 | 1.35246200 |
| H  | -31.88244400 | 10.75110600 | 2.21264300 |
| H  | -30.01077700 | 9.40243000  | 3.12682300 |
| H  | -27.99106800 | 10.56423000 | 1.84565300 |
| O  | -28.25360500 | 12.97361900 | 4.05699000 |
| O  | -27.72965500 | 10.42977100 | 3.89079000 |
| H  | -26.78193800 | 10.50478700 | 3.65312400 |
| Fe | -27.68456600 | 12.02614200 | 5.56905000 |

## *Nitrobenzene Model 2*

NBZ-FeV-O1-C2-TS1-model2:

|    |              |             |             |
|----|--------------|-------------|-------------|
| C  | -31.10569600 | 11.16609500 | 7.97271200  |
| N  | -31.66653700 | 11.78066900 | 6.86217500  |
| H  | -32.65023700 | 11.99582400 | 6.74319200  |
| C  | -30.69555800 | 12.05849400 | 5.97243000  |
| H  | -30.85254800 | 12.55486700 | 5.02778000  |
| N  | -29.52264100 | 11.65142800 | 6.44563900  |
| C  | -29.76540200 | 11.08840400 | 7.68674300  |
| H  | -28.96543900 | 10.67742000 | 8.28400900  |
| C  | -27.75139200 | 15.72193900 | 7.70753000  |
| N  | -26.90436700 | 14.98027900 | 8.52177000  |
| H  | -26.50324200 | 15.29348100 | 9.39904000  |
| C  | -26.67644800 | 13.78031400 | 7.95339200  |
| H  | -26.05789600 | 13.00712300 | 8.38204000  |
| N  | -27.33546800 | 13.70038400 | 6.80173300  |
| C  | -28.00002900 | 14.90595300 | 6.63686300  |
| H  | -28.60675000 | 15.09393700 | 5.76561700  |
| C  | -29.14572700 | 18.24921000 | 0.32215100  |
| H  | -30.05038800 | 17.66643600 | 0.54013300  |
| H  | -28.77406700 | 17.87642800 | -0.64298800 |
| C  | -28.08531000 | 17.93213300 | 1.37848800  |
| O  | -27.41586200 | 18.80255600 | 1.93086600  |
| N  | -27.93768500 | 16.60822100 | 1.67133900  |
| H  | -27.16698900 | 16.32875400 | 2.26492500  |
| H  | -28.39053800 | 15.87048800 | 1.14695000  |
| C  | -25.56172700 | 10.83136900 | 6.11543500  |
| O  | -26.68940200 | 10.76058900 | 6.74012500  |
| O  | -25.44985200 | 11.69526000 | 5.20071900  |
| H  | -23.49362500 | 10.22875300 | 6.08653800  |
| H  | -24.42087300 | 9.64611800  | 7.50912100  |
| H  | -24.66668000 | 8.90058500  | 5.92337100  |
| Fe | -27.65474100 | 12.09881500 | 5.54853300  |
| C  | -24.45600400 | 9.84800300  | 6.43500000  |
| C  | -28.24600000 | 17.09400100 | 8.04400000  |
| H  | -28.81301400 | 17.09602200 | 8.98272700  |
| H  | -27.41942300 | 17.80704100 | 8.15008100  |
| H  | -28.90243600 | 17.45248300 | 7.24696600  |
| C  | -29.46900000 | 19.74099900 | 0.22200000  |
| H  | -32.39703200 | 11.62883600 | 9.62955800  |
| H  | -32.70339900 | 10.04971300 | 8.88894400  |
| H  | -31.27215200 | 10.28711400 | 9.90699500  |
| H  | -30.19683400 | 19.92145000 | -0.57695400 |
| H  | -29.89075100 | 20.12021600 | 1.15914600  |
| H  | -28.56816800 | 20.32316800 | 0.00595700  |
| C  | -31.91499900 | 10.76200000 | 9.16099800  |

|   |              |             |             |
|---|--------------|-------------|-------------|
| C | -26.75971300 | 10.75710800 | 2.47184000  |
| C | -26.61606600 | 9.34749600  | 2.29893800  |
| C | -27.44222100 | 8.65657500  | 1.42380600  |
| C | -28.39495900 | 9.35150000  | 0.66692000  |
| C | -28.49898900 | 10.75639600 | 0.74775900  |
| C | -27.66341200 | 11.43487000 | 1.60690400  |
| N | -27.66728900 | 12.90072100 | 1.59505100  |
| O | -28.64458300 | 13.46792700 | 1.09968100  |
| O | -26.67911000 | 13.47624200 | 2.04332500  |
| H | -26.01368900 | 11.32008300 | 3.01736500  |
| H | -25.87025100 | 8.82585400  | 2.89062800  |
| H | -27.34535400 | 7.58127800  | 1.31565100  |
| H | -29.04630500 | 8.81457500  | -0.01511100 |
| H | -29.19674100 | 11.29678000 | 0.11932100  |
| O | -28.28519700 | 13.11145700 | 4.44404900  |
| O | -27.93878800 | 10.55958300 | 4.22092600  |
| H | -27.54808900 | 9.75448000  | 4.61828600  |

NBZ-FeV-O1-C2-INT1-model2 (radical intermediate):

|   |             |             |             |
|---|-------------|-------------|-------------|
| C | -2.76695600 | -1.84189700 | 3.42410600  |
| N | -3.35875500 | -1.12550900 | 2.39174200  |
| H | -4.33988100 | -0.87293900 | 2.33673800  |
| C | -2.42935600 | -0.80799500 | 1.47710400  |
| H | -2.61401700 | -0.24371300 | 0.57671600  |
| N | -1.24942400 | -1.29238000 | 1.86082800  |
| C | -1.44712200 | -1.94013900 | 3.07181400  |
| H | -0.63341300 | -2.41836500 | 3.59369100  |
| C | 0.71229000  | 2.87207200  | 3.06653600  |
| N | 2.04653400  | 2.50290000  | 3.12352200  |
| H | 2.80109100  | 3.07086300  | 3.49194300  |
| C | 2.18840700  | 1.27263400  | 2.59217600  |
| H | 3.13191500  | 0.76194200  | 2.48672900  |
| N | 1.00561200  | 0.81784400  | 2.19900300  |
| C | 0.08056400  | 1.80622600  | 2.48373400  |
| H | -0.96494400 | 1.69410500  | 2.24340400  |
| C | -0.28680800 | 5.56854000  | -4.60245200 |
| H | -0.30547600 | 5.33067500  | -5.67360500 |
| H | 0.75071400  | 5.85205100  | -4.37334800 |
| C | -0.59514700 | 4.30489300  | -3.79472200 |
| O | -1.22098400 | 4.32575200  | -2.73650400 |
| N | -0.10975500 | 3.15243600  | -4.33519500 |
| H | -0.16941500 | 2.28401000  | -3.81576700 |
| H | 0.46885100  | 3.16053800  | -5.16394700 |
| C | 2.58031300  | -2.04300400 | 1.67758900  |
| O | 1.47120200  | -2.15704000 | 2.30599600  |
| O | 2.59947500  | -1.22032700 | 0.69869700  |
| H | 4.69826900  | -2.33409500 | 1.79440700  |
| H | 3.75663400  | -3.11365000 | 3.11260800  |
| H | 3.74824100  | -3.79781200 | 1.47439500  |

|    |             |             |             |
|----|-------------|-------------|-------------|
| Fe | 0.54555900  | -0.87926000 | 1.04764000  |
| C  | 3.77657400  | -2.86317300 | 2.04918900  |
| C  | 0.20130800  | 4.18340900  | 3.55562200  |
| H  | 0.38281500  | 4.31421000  | 4.62960800  |
| H  | 0.68082500  | 5.01987700  | 3.03276700  |
| H  | -0.87599600 | 4.25008500  | 3.38215100  |
| C  | -1.22576900 | 6.73409800  | -4.28838100 |
| H  | -3.98224800 | -1.48809100 | 5.16068900  |
| H  | -4.33023100 | -3.01236400 | 4.32799900  |
| H  | -2.85431200 | -2.84884700 | 5.29649900  |
| H  | -2.25927100 | 6.49848400  | -4.56645200 |
| H  | -1.21438300 | 6.96468700  | -3.21897600 |
| H  | -0.92180000 | 7.63053800  | -4.83989800 |
| C  | -3.52702200 | -2.32278400 | 4.61428300  |
| C  | -2.10123800 | -1.88734000 | -2.70418600 |
| C  | -2.98624000 | -2.85026700 | -2.19326800 |
| C  | -2.51542400 | -3.88773800 | -1.33848500 |
| C  | -1.19534500 | -3.98379000 | -1.01240300 |
| C  | -0.15642500 | -3.07616800 | -1.59431200 |
| C  | -0.75875900 | -1.96046400 | -2.40755400 |
| N  | 0.14817800  | -1.01160000 | -2.97198700 |
| O  | 1.36600300  | -1.18542200 | -2.75429300 |
| O  | -0.29246700 | -0.07414100 | -3.65039800 |
| H  | -2.46235100 | -1.08536300 | -3.33798900 |
| H  | -4.04039800 | -2.78910600 | -2.44210600 |
| H  | -3.22670300 | -4.60003900 | -0.93112600 |
| H  | -0.82911300 | -4.76005900 | -0.34728900 |
| H  | 0.47799800  | -3.68260100 | -2.26574000 |
| O  | -0.05783100 | 0.05873900  | -0.13307700 |
| O  | 0.72558500  | -2.62299100 | -0.53527200 |
| H  | 1.47700200  | -2.19877400 | -1.00035200 |

NBZ-FeV-O1-C2-TS2-model2:

|   |              |             |            |
|---|--------------|-------------|------------|
| C | -31.05632000 | 11.15410100 | 8.01834500 |
| N | -31.61597800 | 11.78109700 | 6.91290900 |
| H | -32.59696600 | 12.01555000 | 6.80485200 |
| C | -30.65538700 | 12.03849900 | 6.01092600 |
| H | -30.81073300 | 12.53188300 | 5.06491200 |
| N | -29.48454600 | 11.60369500 | 6.47215600 |
| C | -29.72185400 | 11.04759800 | 7.72176300 |
| H | -28.92439500 | 10.61843000 | 8.30859100 |
| C | -27.67147200 | 15.86559000 | 7.48436100 |
| N | -26.31575300 | 15.65178900 | 7.28710700 |
| H | -25.57677300 | 16.31508900 | 7.49273700 |
| C | -26.13024000 | 14.42115400 | 6.77192100 |
| H | -25.17070300 | 14.00716400 | 6.50423700 |
| N | -27.30350000 | 13.81535200 | 6.63019600 |
| C | -28.27006600 | 14.70682600 | 7.06552900 |
| H | -29.32070500 | 14.46338300 | 7.04575900 |

|    |              |             |             |
|----|--------------|-------------|-------------|
| C  | -28.47086400 | 18.61024600 | -0.03861600 |
| H  | -28.47619000 | 18.30634300 | -1.09280800 |
| H  | -27.45243100 | 18.96992900 | 0.16887200  |
| C  | -28.69962700 | 17.38534000 | 0.84787400  |
| O  | -29.30140300 | 17.43861100 | 1.91831300  |
| N  | -28.18234700 | 16.22115300 | 0.35914800  |
| H  | -28.12954200 | 15.41309300 | 0.96828800  |
| H  | -27.56675200 | 16.22611800 | -0.44346500 |
| C  | -25.63907700 | 10.75927500 | 6.19540700  |
| O  | -26.69477800 | 10.66233100 | 6.90036400  |
| O  | -25.67099100 | 11.59806600 | 5.22166600  |
| H  | -23.51568600 | 10.49302500 | 6.27663600  |
| H  | -24.44117200 | 9.48616000  | 7.44211700  |
| H  | -24.42810000 | 9.08749000  | 5.70655800  |
| Fe | -27.67007800 | 12.01529200 | 5.63152100  |
| C  | -24.42600100 | 9.90800000  | 6.43500000  |
| C  | -28.23600000 | 17.13400100 | 8.03400100  |
| H  | -27.87008100 | 17.33339300 | 9.04853100  |
| H  | -27.97087500 | 17.99449600 | 7.40799400  |
| H  | -29.32638900 | 17.06714000 | 8.07288600  |
| C  | -29.47900000 | 19.73099900 | 0.21200000  |
| H  | -32.32816300 | 11.63708400 | 9.68275800  |
| H  | -32.66638900 | 10.06383000 | 8.94143700  |
| H  | -31.22513800 | 10.27549000 | 9.95177900  |
| H  | -29.23140900 | 20.61271200 | -0.38925300 |
| H  | -30.49608300 | 19.41750900 | -0.04982300 |
| H  | -29.48240000 | 20.02067100 | 1.26701500  |
| C  | -31.86499900 | 10.76200000 | 9.21099900  |
| C  | -29.63089300 | 11.98061300 | 1.51200100  |
| C  | -30.78665300 | 11.21056900 | 1.66205400  |
| C  | -30.76028100 | 9.96623000  | 2.36030500  |
| C  | -29.59492000 | 9.47575100  | 2.86331000  |
| C  | -28.27669600 | 10.14657300 | 2.63085900  |
| C  | -28.43401800 | 11.53221300 | 2.04098500  |
| N  | -27.22113500 | 12.24434200 | 1.74520600  |
| O  | -26.15145100 | 11.68958600 | 2.06006600  |
| O  | -27.27353600 | 13.34467200 | 1.18374600  |
| H  | -29.66181900 | 12.93054100 | 0.99101600  |
| H  | -31.72251200 | 11.57617800 | 1.25216400  |
| H  | -31.68760600 | 9.41871800  | 2.49850000  |
| H  | -29.55843300 | 8.53812800  | 3.40999700  |
| H  | -27.75914200 | 9.54862100  | 1.85186100  |
| O  | -28.27332400 | 12.67652700 | 4.24409400  |
| O  | -27.49338300 | 10.06683900 | 3.82496000  |
| H  | -26.62433200 | 10.45618600 | 3.59419600  |

NBZ-FeV-O1-C2-PC-model2 (diol):

|   |             |             |            |
|---|-------------|-------------|------------|
| C | -2.79814200 | -1.76574200 | 3.49015800 |
| N | -3.37883600 | -1.16543900 | 2.38037900 |



|    |             |             |             |
|----|-------------|-------------|-------------|
| H  | -4.36810400 | -0.97157900 | 2.26695400  |
| C  | -2.42673900 | -0.88165800 | 1.47703700  |
| H  | -2.60631400 | -0.41628100 | 0.52079700  |
| N  | -1.23880100 | -1.26979600 | 1.94170000  |
| C  | -1.46081100 | -1.82484000 | 3.19421600  |
| H  | -0.64893900 | -2.22279500 | 3.78334800  |
| C  | 0.60473600  | 2.95244000  | 2.88981700  |
| N  | 1.91487300  | 2.82847700  | 2.44841400  |
| H  | 2.63005200  | 3.54449000  | 2.51627300  |
| C  | 2.09382500  | 1.60596800  | 1.91881200  |
| H  | 3.01881700  | 1.24798200  | 1.49425300  |
| N  | 0.95846400  | 0.91458500  | 1.99300700  |
| C  | 0.02637800  | 1.74520400  | 2.59945600  |
| H  | -0.98671900 | 1.42430500  | 2.78235600  |
| C  | -0.24486500 | 5.61915200  | -4.14252100 |
| H  | -0.29808600 | 4.93419400  | -4.99766500 |
| H  | 0.79097800  | 5.98742800  | -4.11179100 |
| C  | -0.47789700 | 4.83844300  | -2.84946300 |
| O  | -1.03018600 | 5.32119100  | -1.86430100 |
| N  | -0.02221500 | 3.54999500  | -2.86844900 |
| H  | 0.01703000  | 3.03967900  | -1.99487200 |
| H  | 0.56523700  | 3.21281400  | -3.61895000 |
| C  | 2.62419500  | -2.17668200 | 1.66813800  |
| O  | 1.53276200  | -2.35435000 | 2.29097200  |
| O  | 2.62956300  | -1.27902900 | 0.74435200  |
| H  | 4.74849700  | -2.39701800 | 1.86908800  |
| H  | 3.78021600  | -3.51161100 | 2.89252800  |
| H  | 3.91440900  | -3.77591700 | 1.13733500  |
| Fe | 0.58544100  | -0.89569200 | 1.01267700  |
| C  | 3.84693000  | -3.01328100 | 1.92342400  |
| C  | 0.05866000  | 4.20058700  | 3.50395900  |
| H  | 0.61399300  | 4.48512300  | 4.40557900  |
| H  | 0.10480400  | 5.04154700  | 2.80166500  |
| H  | -0.98741100 | 4.04807100  | 3.78199900  |
| C  | -1.20852800 | 6.79227200  | -4.32038200 |
| H  | -4.10000600 | -1.33543100 | 5.14730000  |
| H  | -4.36103400 | -2.92440000 | 4.40849700  |
| H  | -2.93649100 | -2.64419500 | 5.42578600  |
| H  | -0.95596300 | 7.36348500  | -5.22037900 |
| H  | -2.24364300 | 6.44562700  | -4.41822000 |
| H  | -1.16379900 | 7.46564500  | -3.45934100 |
| C  | -3.59416400 | -2.18930600 | 4.68056300  |
| C  | -1.31035200 | -0.20682100 | -2.60078900 |
| C  | -2.47083000 | -0.88134900 | -2.68583600 |
| C  | -2.65999800 | -2.19240400 | -2.06059000 |
| C  | -1.62850300 | -2.84292400 | -1.49969600 |
| C  | -0.23133300 | -2.31368900 | -1.63699900 |
| C  | -0.16894200 | -0.77439500 | -1.80282700 |
| N  | 1.19947900  | -0.45694000 | -2.55899200 |
| O  | 2.10594600  | -1.28361900 | -2.45209400 |

|   |             |             |             |
|---|-------------|-------------|-------------|
| O | 1.30677900  | 0.62211100  | -3.12169200 |
| H | -1.19272600 | 0.79812500  | -2.99042600 |
| H | -3.31625300 | -0.42949200 | -3.19806300 |
| H | -3.65693200 | -2.62332300 | -2.05355800 |
| H | -1.73397000 | -3.81789300 | -1.03271100 |
| H | 0.21708500  | -2.78677200 | -2.52005000 |
| O | -0.02167500 | -0.13724000 | -0.59622500 |
| O | 0.55525500  | -2.67310700 | -0.48490000 |
| H | 1.48931600  | -2.61012000 | -0.77266500 |

### *2-nitrotoluene Model 1*

2NT-FeV-O1-C2-TS1-modell:

|    |            |            |            |
|----|------------|------------|------------|
| C  | -4.5135730 | -3.8389890 | 0.6804990  |
| C  | -3.5008750 | -2.8912570 | 0.1317930  |
| C  | -2.5920130 | -2.0580420 | 0.7330330  |
| N  | -3.3141400 | -2.6941100 | -1.2288210 |
| C  | -2.3376060 | -1.7845370 | -1.4125670 |
| N  | -1.8804920 | -1.3747620 | -0.2366310 |
| H  | -4.4870990 | -3.8214640 | 1.7733980  |
| H  | -4.3204330 | -4.8683480 | 0.3539780  |
| H  | -5.5289640 | -3.5735470 | 0.3612220  |
| H  | -3.8277280 | -3.1602930 | -1.9682780 |
| H  | -2.4006530 | -1.9047210 | 1.7842920  |
| H  | -1.9889850 | -1.4420220 | -2.3741690 |
| C  | -4.4765400 | 3.7393020  | -1.2713350 |
| C  | -3.4582860 | 2.9434950  | -0.5101130 |
| C  | -2.4065360 | 2.1630770  | -0.9172180 |
| N  | -3.4506500 | 2.8387020  | 0.8749770  |
| C  | -2.4474160 | 2.0231230  | 1.2557410  |
| N  | -1.7894730 | 1.5910410  | 0.1854970  |
| H  | -4.2524820 | 3.6988330  | -2.3405440 |
| H  | -4.4778890 | 4.7914480  | -0.9627740 |
| H  | -5.4878350 | 3.3433720  | -1.1187600 |
| H  | -4.0965440 | 3.3004680  | 1.5055710  |
| H  | -2.0562370 | 1.9610400  | -1.9173830 |
| H  | -2.2311260 | 1.7561800  | 2.2783970  |
| C  | 1.4374550  | 0.5157490  | 3.5657210  |
| C  | 0.7343550  | 0.4824850  | 2.2328160  |
| O  | -0.3370370 | -0.2120000 | 2.0684540  |
| O  | 1.2037910  | 1.0728470  | 1.2121490  |
| H  | 1.9201960  | 1.4852280  | 3.7148170  |
| H  | 2.2163990  | -0.2557110 | 3.5642320  |
| H  | 0.7392720  | 0.3066500  | 4.3796280  |
| Fe | -0.3648540 | 0.0629380  | 0.0463460  |
| O  | -0.1630690 | 0.4033870  | -1.5304500 |
| O  | 0.9150610  | -1.5539450 | -0.0479890 |
| H  | 1.4548410  | -1.6227890 | 0.7702210  |
| C  | 2.8632830  | -1.5220040 | -1.0863520 |

|   |           |            |            |
|---|-----------|------------|------------|
| N | 3.8573960 | -0.5749840 | 0.9251240  |
| O | 3.2549800 | -1.4500250 | 1.5762100  |
| C | 3.4698360 | -0.3966360 | -0.4686000 |
| O | 4.7488280 | 0.1191490  | 1.3984110  |
| C | 3.6413280 | 0.8243760  | -1.1226360 |
| C | 3.2015750 | 0.8666170  | -2.4691740 |
| C | 2.6392080 | -0.2359220 | -3.1202520 |
| C | 2.4766300 | -1.4341860 | -2.4418600 |
| C | 4.2092840 | 2.0703370  | -0.5003760 |
| H | 3.3089190 | 1.8038470  | -3.0071730 |
| H | 2.3383810 | -0.1475910 | -4.1593090 |
| H | 2.0608110 | -2.3086810 | -2.9301630 |
| H | 2.9531080 | -2.4930620 | -0.6188160 |
| H | 4.0181450 | 2.9275030  | -1.1513280 |
| H | 3.7619490 | 2.2654040  | 0.4786590  |
| H | 5.2905790 | 1.9834410  | -0.3507020 |

2NT-FeV-O1-C2-INT1-model1 (radical intermediate):

|   |            |            |            |
|---|------------|------------|------------|
| C | -1.6866830 | 4.6145820  | -1.7944890 |
| C | -1.1970900 | 3.3946710  | -1.0890240 |
| C | -1.1408280 | 2.0736600  | -1.4506020 |
| N | -0.6971900 | 3.4305050  | 0.2055540  |
| C | -0.3674030 | 2.1868600  | 0.5904100  |
| N | -0.6246200 | 1.3344180  | -0.3970930 |
| H | -2.0036090 | 4.3576510  | -2.8086510 |
| H | -0.9051300 | 5.3805860  | -1.8652370 |
| H | -2.5428460 | 5.0588620  | -1.2722820 |
| H | -0.5969290 | 4.2636310  | 0.7753100  |
| H | -1.4370030 | 1.6046090  | -2.3763230 |
| H | 0.0396850  | 1.9251240  | 1.5538820  |
| C | -5.1574060 | -0.0887590 | 3.1502780  |
| C | -4.2662640 | -0.4021780 | 1.9910450  |
| C | -2.9030870 | -0.4871270 | 1.8739450  |
| N | -4.7434810 | -0.6585070 | 0.7130760  |
| C | -3.7039760 | -0.8733700 | -0.1153690 |
| N | -2.5642570 | -0.7725600 | 0.5605970  |
| H | -4.5550040 | 0.0664770  | 4.0491310  |
| H | -5.8612280 | -0.9057130 | 3.3501760  |
| H | -5.7433790 | 0.8207630  | 2.9704710  |
| H | -5.7203160 | -0.6835020 | 0.4415800  |
| H | -2.1468190 | -0.3617170 | 2.6333240  |
| H | -3.7940670 | -1.0847630 | -1.1692620 |
| C | -0.8354320 | -3.1634920 | -3.2239150 |
| C | -0.8638610 | -2.2512920 | -2.0357790 |
| O | -1.2752440 | -1.0401610 | -2.1137380 |
| O | -0.4170280 | -2.6224020 | -0.8950800 |
| H | -0.9097000 | -4.2067030 | -2.9081040 |
| H | 0.1249180  | -3.0247600 | -3.7370710 |
| H | -1.6377250 | -2.9125450 | -3.9220540 |

|    |            |            |            |
|----|------------|------------|------------|
| Fe | -0.6124180 | -0.6817980 | -0.2203020 |
| O  | 0.0483130  | -0.6836720 | 1.2622050  |
| O  | 1.5356960  | -0.8553560 | -1.2214410 |
| H  | 1.6811210  | -1.7969030 | -0.9795140 |
| C  | 2.8261860  | -0.2390740 | -0.9761610 |
| N  | 3.2867010  | -1.6857310 | 0.9677610  |
| O  | 2.9527860  | -2.5981970 | 0.1710730  |
| C  | 3.2777460  | -0.3482540 | 0.4644190  |
| O  | 3.6176780  | -1.9227570 | 2.1340190  |
| C  | 3.7488680  | 0.7319710  | 1.2042190  |
| C  | 3.7665410  | 1.9955390  | 0.5607060  |
| C  | 3.2948490  | 2.1969050  | -0.7614960 |
| C  | 2.8037700  | 1.1591150  | -1.4937140 |
| C  | 4.2493620  | 0.6667990  | 2.6253010  |
| H  | 4.1499310  | 2.8439660  | 1.1186420  |
| H  | 3.3167280  | 3.1989500  | -1.1797910 |
| H  | 2.4174660  | 1.2940610  | -2.4990540 |
| H  | 3.5442730  | -0.8102100 | -1.5915680 |
| H  | 4.5680130  | 1.6614000  | 2.9491010  |
| H  | 3.4727840  | 0.3049630  | 3.3060160  |
| H  | 5.0922800  | -0.0233340 | 2.7249200  |

2NT-FeV-O1-C2-TS2-modell1:

|   |            |            |            |
|---|------------|------------|------------|
| C | -3.0177050 | 4.4964370  | -1.1742510 |
| C | -2.1223100 | 3.3898680  | -0.7273490 |
| C | -1.8183290 | 2.1640950  | -1.2619510 |
| N | -1.3922850 | 3.4538180  | 0.4504640  |
| C | -0.6969770 | 2.3137210  | 0.6040260  |
| N | -0.9324810 | 1.5036120  | -0.4236600 |
| H | -3.4762260 | 4.2414080  | -2.1333210 |
| H | -2.4643370 | 5.4348970  | -1.3012620 |
| H | -3.8219000 | 4.6786160  | -0.4510950 |
| H | -1.3842210 | 4.2354540  | 1.0963480  |
| H | -2.1729510 | 1.7103690  | -2.1747500 |
| H | -0.0499080 | 2.0940760  | 1.4377530  |
| C | -4.2096560 | -1.3169530 | 3.6632880  |
| C | -3.5122890 | -1.3129490 | 2.3430990  |
| C | -2.2134290 | -1.0582350 | 1.9893730  |
| N | -4.1614830 | -1.5610790 | 1.1422670  |
| C | -3.2819910 | -1.4498830 | 0.1291940  |
| N | -2.0831580 | -1.1381930 | 0.6122920  |
| H | -3.4916200 | -1.1163720 | 4.4628210  |
| H | -4.6840810 | -2.2842230 | 3.8680290  |
| H | -4.9901620 | -0.5472930 | 3.7044930  |
| H | -5.1417910 | -1.8007190 | 1.0425460  |
| H | -1.3689320 | -0.8203320 | 2.6173550  |
| H | -3.5278480 | -1.5774920 | -0.9136730 |
| C | -0.7708330 | -2.6829220 | -3.7577890 |
| C | -0.7073500 | -1.8884440 | -2.4854620 |

|    |            |            |            |
|----|------------|------------|------------|
| O  | -1.3262750 | -0.7802410 | -2.3455790 |
| O  | 0.0169020  | -2.2789280 | -1.5056380 |
| H  | 0.1183310  | -2.4496960 | -4.3574090 |
| H  | -1.6599800 | -2.4221490 | -4.3362970 |
| H  | -0.7553940 | -3.7537390 | -3.5379390 |
| Fe | -0.4204390 | -0.4995430 | -0.4700370 |
| O  | 0.6367780  | -0.4499950 | 0.8089500  |
| O  | 1.7208170  | -0.1793700 | -1.6765720 |
| H  | 1.8673820  | -1.1494050 | -1.7079510 |
| C  | 2.8544600  | 0.3479590  | -0.9717000 |
| N  | 3.1146730  | -1.6229070 | 0.5148630  |
| O  | 3.0398420  | -2.2419740 | -0.5676080 |
| C  | 3.0440120  | -0.1831540 | 0.4410140  |
| O  | 3.2524520  | -2.1882750 | 1.6004970  |
| C  | 3.4606860  | 0.6302170  | 1.4987640  |
| C  | 3.5404330  | 2.0149340  | 1.2443930  |
| C  | 3.2061930  | 2.6080710  | -0.0026730 |
| C  | 2.8196900  | 1.8361280  | -1.0527450 |
| C  | 3.8088120  | 0.1451970  | 2.8836800  |
| H  | 3.8580650  | 2.6591850  | 2.0584660  |
| H  | 3.2485350  | 3.6886920  | -0.0988620 |
| H  | 2.5397120  | 2.2587210  | -2.0125480 |
| H  | 3.7581770  | 0.0307800  | -1.5304230 |
| H  | 4.1185440  | 0.9919870  | 3.5024630  |
| H  | 2.9527050  | -0.3448020 | 3.3574410  |
| H  | 4.6178210  | -0.5908570 | 2.8653350  |

2NT-FeV-O1-C2-PC-model1 (diol):

|   |            |            |            |
|---|------------|------------|------------|
| C | 3.8832700  | 4.1225780  | -0.0470390 |
| C | 2.7047420  | 3.2079620  | -0.0643360 |
| C | 2.3679500  | 2.1077250  | 0.6807820  |
| N | 1.6696090  | 3.3458750  | -0.9780830 |
| C | 0.7736360  | 2.3638640  | -0.7865320 |
| N | 1.1681890  | 1.5864750  | 0.2198520  |
| H | 4.5664460  | 3.8365040  | 0.7568820  |
| H | 3.5817870  | 5.1641280  | 0.1177220  |
| H | 4.4338740  | 4.0793810  | -0.9946080 |
| H | 1.5974400  | 4.0741060  | -1.6801110 |
| H | 2.8976150  | 1.6521340  | 1.5031230  |
| H | -0.1274600 | 2.2343490  | -1.3644520 |
| C | 3.1229550  | -2.5929250 | -3.6445390 |
| C | 2.7022180  | -2.1662120 | -2.2773650 |
| C | 1.5502620  | -1.5948040 | -1.8058120 |
| N | 3.5161280  | -2.2922340 | -1.1599260 |
| C | 2.8733300  | -1.8090870 | -0.0828040 |
| N | 1.6695010  | -1.3705220 | -0.4422290 |
| H | 2.3196550  | -2.3928060 | -4.3583470 |
| H | 3.3489500  | -3.6655810 | -3.6784350 |
| H | 4.0177550  | -2.0523420 | -3.9758930 |

|    |            |            |            |
|----|------------|------------|------------|
| H  | 4.4466510  | -2.6957340 | -1.1521730 |
| H  | 0.6514570  | -1.3282060 | -2.3395990 |
| H  | 3.2860420  | -1.7754060 | 0.9133820  |
| C  | 0.9292130  | -1.8355780 | 4.3164720  |
| C  | 0.7574700  | -1.2708770 | 2.9363760  |
| O  | 1.4478090  | -0.2868690 | 2.5151430  |
| O  | -0.1390190 | -1.7356050 | 2.1454190  |
| H  | 0.2279070  | -1.3259270 | 4.9895160  |
| H  | 1.9436430  | -1.6603890 | 4.6819320  |
| H  | 0.6942780  | -2.9026220 | 4.3260970  |
| Fe | 0.3199120  | -0.2646080 | 0.6870230  |
| O  | -1.0406740 | -0.2507930 | -0.5979410 |
| O  | -1.5269180 | 0.5264150  | 1.8196200  |
| H  | -1.6945670 | -0.2708460 | 2.3587340  |
| C  | -2.6444370 | 0.7296400  | 0.9231470  |
| N  | -3.0086840 | -1.5263270 | -0.1362100 |
| O  | -4.2046720 | -1.5492640 | 0.1438470  |
| C  | -2.3699260 | -0.0811540 | -0.3869430 |
| O  | -2.2899660 | -2.5035710 | -0.2657330 |
| C  | -3.0597770 | 0.4693240  | -1.6327580 |
| C  | -3.4325690 | 1.7639100  | -1.6408470 |
| C  | -3.2578540 | 2.6555310  | -0.4953970 |
| C  | -2.8322550 | 2.1978340  | 0.6914970  |
| C  | -3.1498330 | -0.4293010 | -2.8331880 |
| H  | -3.8476030 | 2.1855720  | -2.5532430 |
| H  | -3.4778550 | 3.7107740  | -0.6311960 |
| H  | -2.6971710 | 2.8446100  | 1.5535930  |
| H  | -3.5491250 | 0.3353700  | 1.4008740  |
| H  | -3.5025810 | 0.1286970  | -3.7053350 |
| H  | -2.1751110 | -0.8697990 | -3.0760880 |
| H  | -3.8458000 | -1.2621030 | -2.6659330 |

### ***2-nitrotoluene Model 2***

2NT-FeV-O1-C2-TS1-model2:

|   |            |            |           |
|---|------------|------------|-----------|
| C | 5.1414490  | 0.2966620  | 3.6447110 |
| C | 3.9282400  | 0.2014340  | 2.7766490 |
| C | 3.7485320  | 0.0119020  | 1.4281830 |
| N | 2.6450580  | 0.3230780  | 3.2884600 |
| C | 1.7555190  | 0.2123020  | 2.2848200 |
| N | 2.3934450  | 0.0202010  | 1.1358210 |
| H | 6.0444490  | 0.1709440  | 3.0413780 |
| H | 5.1417990  | -0.4785550 | 4.4207080 |
| H | 5.1994610  | 1.2709390  | 4.1450620 |
| H | 2.4131730  | 0.4749620  | 4.2637260 |
| H | 4.4895690  | -0.1206860 | 0.6544740 |
| H | 0.6857640  | 0.2818010  | 2.4018700 |
| C | -0.0603930 | 5.3427290  | 0.6898550 |
| C | 0.6386090  | 4.1797280  | 0.0547040 |

|    |            |            |            |
|----|------------|------------|------------|
| C  | 0.3036920  | 2.8547790  | -0.0423360 |
| N  | 1.8769310  | 4.2716200  | -0.5681690 |
| C  | 2.2510050  | 3.0516650  | -1.0012050 |
| N  | 1.3137300  | 2.1618460  | -0.6918520 |
| H  | -1.0206650 | 5.0161560  | 1.0974730  |
| H  | -0.2521470 | 6.1436540  | -0.0342380 |
| H  | 0.5328550  | 5.7672970  | 1.5087840  |
| H  | 2.4164090  | 5.1220570  | -0.6861580 |
| H  | -0.5798690 | 2.3485910  | 0.3134080  |
| H  | 3.1781130  | 2.8370340  | -1.5091350 |
| C  | 3.5730180  | -0.3795480 | -4.0874140 |
| C  | 2.6815890  | -0.0529230 | -2.9078740 |
| O  | 3.1899960  | 0.1313280  | -1.7376240 |
| O  | 1.4220370  | -0.0125220 | -3.0192880 |
| H  | 3.0787240  | -0.1102510 | -5.0234810 |
| H  | 3.7603490  | -1.4605720 | -4.0877970 |
| H  | 4.5355380  | 0.1316820  | -4.0006420 |
| Fe | 1.4215540  | 0.0902270  | -0.7393760 |
| O  | -0.0853180 | 0.0283220  | -0.1167860 |
| O  | 1.3951560  | -1.9178560 | -1.2066640 |
| H  | 0.8119090  | -1.8811660 | -1.9955860 |
| C  | 0.1533630  | -3.4310730 | -0.4476720 |
| N  | -1.8717890 | -2.3482420 | -1.2587630 |
| O  | -1.2873570 | -2.2209280 | -2.3423850 |
| C  | -1.0883280 | -2.8135590 | -0.1216820 |
| O  | -3.0710300 | -2.1146490 | -1.1014950 |
| C  | -1.5155430 | -2.6273540 | 1.1926490  |
| C  | -0.6490170 | -3.1338690 | 2.2014410  |
| C  | 0.5612990  | -3.7739310 | 1.9190940  |
| C  | 0.9654510  | -3.9363720 | 0.6038620  |
| C  | -2.7902480 | -1.9570160 | 1.6243070  |
| H  | -0.9569270 | -3.0131430 | 3.2355340  |
| H  | 1.1714890  | -4.1532050 | 2.7325580  |
| H  | 1.8867370  | -4.4506880 | 0.3534630  |
| H  | 0.2773600  | -3.8437480 | -1.4400640 |
| H  | -2.7666740 | -1.7841070 | 2.7040190  |
| H  | -2.9673250 | -1.0031860 | 1.1204560  |
| H  | -3.6576240 | -2.5875010 | 1.3983420  |
| C  | -7.6161940 | 1.8915290  | 1.2806370  |
| H  | -8.3932770 | 2.6627410  | 1.2464190  |
| H  | -8.1050840 | 0.9250480  | 1.4504150  |
| H  | -6.9640650 | 2.0932400  | 2.1358050  |
| C  | -6.8068970 | 1.8841810  | -0.0198630 |
| H  | -7.4499770 | 1.6521390  | -0.8766570 |
| H  | -6.3958470 | 2.8874880  | -0.2006590 |
| C  | -5.6171680 | 0.9245040  | 0.0230510  |
| O  | -4.9206640 | 0.7843850  | 1.0301190  |
| N  | -5.3654950 | 0.2619730  | -1.1357430 |
| H  | -4.5670200 | -0.3593150 | -1.1992420 |
| H  | -5.9411760 | 0.3818690  | -1.9572270 |

2NT-FeV-O1-C2-INT1-model2 (radical intermediate):

|    |            |            |            |
|----|------------|------------|------------|
| C  | 4.6242880  | 0.5679890  | 3.8121850  |
| C  | 3.4902880  | 0.3908080  | 2.8558430  |
| C  | 3.4277750  | 0.2913810  | 1.4892720  |
| N  | 2.1697630  | 0.3139280  | 3.2768120  |
| C  | 1.3672990  | 0.1811840  | 2.2087570  |
| N  | 2.1019640  | 0.1625300  | 1.0994660  |
| H  | 5.5718090  | 0.5959260  | 3.2678280  |
| H  | 4.6709410  | -0.2540400 | 4.5365670  |
| H  | 4.5265270  | 1.5044500  | 4.3744140  |
| H  | 1.8552680  | 0.3512490  | 4.2404980  |
| H  | 4.2281270  | 0.3119420  | 0.7654140  |
| H  | 0.2920770  | 0.1124550  | 2.2494310  |
| C  | -0.5349310 | 5.4403350  | 0.9356710  |
| C  | 0.2645740  | 4.3735360  | 0.2606470  |
| C  | 0.0227620  | 3.0401930  | 0.0634120  |
| N  | 1.5186940  | 4.5887130  | -0.2946130 |
| C  | 1.9922240  | 3.4279840  | -0.7877260 |
| N  | 1.1041120  | 2.4611250  | -0.5809200 |
| H  | -1.4931930 | 5.0301550  | 1.2648130  |
| H  | -0.7382440 | 6.2811140  | 0.2614760  |
| H  | -0.0119790 | 5.8358710  | 1.8150100  |
| H  | 1.9998010  | 5.4806360  | -0.3349400 |
| H  | -0.8408490 | 2.4568060  | 0.3421170  |
| H  | 2.9524800  | 3.3112960  | -1.2651320 |
| C  | -8.0154300 | 1.7478300  | 0.9235320  |
| H  | -7.4073180 | 2.4184180  | 1.5380300  |
| H  | -8.9024930 | 2.2942870  | 0.5852710  |
| H  | -8.3490230 | 0.9219500  | 1.5622630  |
| C  | -7.2128360 | 1.2349840  | -0.2738110 |
| H  | -6.9542510 | 2.0752600  | -0.9344200 |
| H  | -7.8133130 | 0.5450880  | -0.8793990 |
| C  | -5.8961140 | 0.5624730  | 0.1216180  |
| N  | -5.4298660 | -0.3524140 | -0.7744590 |
| O  | -5.2951620 | 0.8333590  | 1.1595830  |
| H  | -5.8834510 | -0.4987230 | -1.6658370 |
| H  | -4.5042620 | -0.7458990 | -0.6513470 |
| C  | 3.4839130  | 0.1717410  | -4.0498640 |
| C  | 2.6410330  | 0.3646080  | -2.8218530 |
| O  | 3.1594090  | 0.5683240  | -1.6661490 |
| O  | 1.3662310  | 0.2791170  | -2.8600200 |
| H  | 2.9461270  | 0.5115790  | -4.9383550 |
| H  | 3.6879940  | -0.9009810 | -4.1603420 |
| H  | 4.4369510  | 0.6967190  | -3.9502640 |
| Fe | 1.3424760  | 0.3926520  | -0.7755840 |
| O  | -0.2008010 | 0.1528180  | -0.3316880 |
| O  | 1.4741570  | -1.8890130 | -1.3527640 |



|   |            |            |            |
|---|------------|------------|------------|
| H | 0.8992790  | -1.7924230 | -2.1428310 |
| C | 0.9892580  | -3.0980320 | -0.7113130 |
| N | -1.3710810 | -2.5930370 | -1.2219170 |
| O | -0.9228940 | -2.4140340 | -2.3796440 |
| C | -0.4392600 | -2.9964410 | -0.2181800 |
| O | -2.5694040 | -2.4401880 | -0.9500470 |
| C | -0.8347720 | -3.3799980 | 1.0602970  |
| C | 0.1775550  | -3.8485820 | 1.9363830  |
| C | 1.5486300  | -3.9017540 | 1.5779690  |
| C | 1.9622680  | -3.5061240 | 0.3424440  |
| C | -2.2490980 | -3.3496940 | 1.5835400  |
| H | -0.1193120 | -4.1663530 | 2.9307500  |
| H | 2.2701250  | -4.2485000 | 2.3119240  |
| H | 3.0084710  | -3.5183300 | 0.0525250  |
| H | 1.0117830  | -3.8720540 | -1.4991840 |
| H | -2.2707830 | -3.7251160 | 2.6102210  |
| H | -2.6598550 | -2.3354530 | 1.5701120  |
| H | -2.9177380 | -3.9617980 | 0.9708920  |

2NT-FeV-O1-C2-TS2-model2:

|   |            |            |            |
|---|------------|------------|------------|
| C | 5.0288050  | 0.9142850  | 3.8078360  |
| C | 3.8764260  | 0.5756600  | 2.9178030  |
| C | 3.7252990  | 0.5461290  | 1.5546180  |
| N | 2.6340370  | 0.2090470  | 3.4183280  |
| C | 1.7907660  | -0.0198550 | 2.3978280  |
| N | 2.4239070  | 0.1764160  | 1.2434050  |
| H | 5.9025800  | 1.1735860  | 3.2043140  |
| H | 5.2989880  | 0.0697590  | 4.4531650  |
| H | 4.7949230  | 1.7689350  | 4.4540490  |
| H | 2.3953170  | 0.1311990  | 4.4010530  |
| H | 4.4470690  | 0.7608080  | 0.7818270  |
| H | 0.7592890  | -0.3168350 | 2.5020120  |
| C | -0.4802450 | 5.3324370  | 0.8477910  |
| C | 0.1064540  | 4.1929700  | 0.0817200  |
| C | 0.6165230  | 2.9861610  | 0.4818510  |
| N | 0.2037490  | 4.1740600  | -1.3010370 |
| C | 0.7417900  | 3.0024990  | -1.6925890 |
| N | 1.0104910  | 2.2563380  | -0.6275670 |
| H | -0.4587370 | 5.1102680  | 1.9179750  |
| H | -1.5231390 | 5.5115690  | 0.5591060  |
| H | 0.0763320  | 6.2629170  | 0.6819910  |
| H | -0.0903370 | 4.9189820  | -1.9227510 |
| H | 0.7153530  | 2.5980390  | 1.4834810  |
| H | 0.9018080  | 2.7128710  | -2.7194810 |
| C | -7.7505900 | 1.2721570  | 1.3466050  |
| H | -7.2479770 | 1.3098720  | 2.3177160  |
| H | -8.5466660 | 2.0245200  | 1.3377470  |
| H | -8.2161220 | 0.2847380  | 1.2469070  |
| C | -6.7532750 | 1.5343990  | 0.2149380  |

|    |            |            |            |
|----|------------|------------|------------|
| H  | -6.3643230 | 2.5594310  | 0.2982770  |
| H  | -7.2485510 | 1.4706320  | -0.7612300 |
| C  | -5.5413860 | 0.6022100  | 0.2507590  |
| N  | -5.0296600 | 0.2725850  | -0.9639710 |
| O  | -5.0456240 | 0.2023960  | 1.3056270  |
| H  | -4.1899940 | -0.2918610 | -1.0199230 |
| H  | -5.4373090 | 0.6072920  | -1.8256850 |
| C  | 3.6313360  | -0.0233190 | -3.9662990 |
| C  | 2.8338090  | 0.1543520  | -2.7026260 |
| O  | 3.3884410  | 0.3103210  | -1.5664400 |
| O  | 1.5520020  | 0.1066020  | -2.7235260 |
| H  | 3.7184110  | -1.0972220 | -4.1745970 |
| H  | 4.6350520  | 0.3925730  | -3.8532680 |
| H  | 3.1150910  | 0.4426160  | -4.8097820 |
| Fe | 1.5210410  | 0.2192090  | -0.6071890 |
| O  | 0.0329240  | -0.2780980 | -0.0788430 |
| O  | 1.5811410  | -2.1561560 | -1.2184300 |
| H  | 1.1500120  | -1.9838700 | -2.0830070 |
| C  | 0.7198690  | -3.0903110 | -0.5491230 |
| N  | -1.3724820 | -2.1728690 | -1.5190410 |
| O  | -0.7236080 | -2.2451690 | -2.5845610 |
| C  | -0.7115590 | -2.6211460 | -0.3242360 |
| O  | -2.5328750 | -1.7493670 | -1.4785940 |
| C  | -1.4225920 | -2.9212860 | 0.8431200  |
| C  | -0.6944830 | -3.5143990 | 1.8963980  |
| C  | 0.6961860  | -3.7971770 | 1.8326650  |
| C  | 1.3992570  | -3.5518200 | 0.6955410  |
| C  | -2.8919510 | -2.6674920 | 1.0669080  |
| H  | -1.2317010 | -3.7466010 | 2.8108130  |
| H  | 1.1907760  | -4.2042050 | 2.7094500  |
| H  | 2.4639770  | -3.7485720 | 0.6170860  |
| H  | 0.6414720  | -3.9790850 | -1.2066230 |
| H  | -3.1904340 | -3.0935160 | 2.0288430  |
| H  | -3.1363620 | -1.5999010 | 1.0743000  |
| H  | -3.5040120 | -3.1203660 | 0.2814070  |

2NT-FeV-O1-C2-PC-model2 (diol):

|   |             |            |             |
|---|-------------|------------|-------------|
| C | -0.06000000 | 5.15700000 | -0.97300000 |
| C | -0.75800000 | 4.01100000 | -0.31700000 |
| C | -0.44000000 | 2.68400000 | -0.19300000 |
| N | -1.98200000 | 4.14100000 | 0.32400000  |
| C | -2.36800000 | 2.94400000 | 0.79700000  |
| N | -1.45000000 | 2.02800000 | 0.49500000  |
| H | 0.89000000  | 4.82000000 | -1.39600000 |
| H | 0.15200000  | 5.96100000 | -0.25700000 |
| H | -0.66300000 | 5.58200000 | -1.78400000 |
| H | -2.50400000 | 5.00500000 | 0.42500000  |
| H | 0.43500000  | 2.15600000 | -0.54000000 |
| H | -3.29000000 | 2.76400000 | 1.32800000  |

|    |             |             |             |
|----|-------------|-------------|-------------|
| C  | -3.63700000 | -0.30100000 | 4.14300000  |
| C  | -2.86300000 | -0.13200000 | 2.86700000  |
| O  | -3.44400000 | -0.11800000 | 1.73100000  |
| O  | -1.58500000 | -0.04800000 | 2.87100000  |
| H  | -3.70200000 | -1.37300000 | 4.36900000  |
| H  | -4.65300000 | 0.08600000  | 4.03200000  |
| H  | -3.12500000 | 0.19200000  | 4.97300000  |
| Fe | -1.59500000 | -0.03900000 | 0.70900000  |
| O  | 0.10400000  | -0.41800000 | 0.04000000  |
| O  | -1.16700000 | -2.19200000 | 1.36500000  |
| H  | -1.01100000 | -1.97800000 | 2.30600000  |
| C  | 0.04800000  | -2.73400000 | 0.79100000  |
| N  | 2.09800000  | -1.25900000 | 1.03700000  |
| O  | 2.83300000  | -2.20600000 | 1.28800000  |
| C  | 0.83700000  | -1.55500000 | 0.09300000  |
| O  | 2.27600000  | -0.10500000 | 1.41000000  |
| C  | 1.45000000  | -1.87300000 | -1.27000000 |
| C  | 1.12700000  | -3.02400000 | -1.89000000 |
| C  | 0.22500000  | -4.02200000 | -1.32400000 |
| C  | -0.32000000 | -3.87300000 | -0.10800000 |
| C  | 2.30800000  | -0.80800000 | -1.89400000 |
| H  | 1.52800000  | -3.21300000 | -2.88300000 |
| H  | -0.01300000 | -4.89400000 | -1.92700000 |
| H  | -1.00600000 | -4.60300000 | 0.31300000  |
| H  | 0.65900000  | -3.12900000 | 1.61000000  |
| H  | 2.54800000  | -1.07500000 | -2.92800000 |
| H  | 1.79300000  | 0.16000000  | -1.90100000 |
| H  | 3.25700000  | -0.66600000 | -1.35900000 |
| C  | -5.24700000 | 0.21600000  | -3.62700000 |
| C  | -4.08900000 | -0.08600000 | -2.74000000 |
| C  | -3.91500000 | -0.02700000 | -1.38100000 |
| N  | -2.85700000 | -0.48700000 | -3.23700000 |
| C  | -1.99700000 | -0.64600000 | -2.21800000 |
| N  | -2.60800000 | -0.36900000 | -1.06800000 |
| H  | -6.11600000 | 0.49900000  | -3.02500000 |
| H  | -5.52400000 | -0.65400000 | -4.23400000 |
| H  | -5.02100000 | 1.04200000  | -4.31000000 |
| H  | -2.64000000 | -0.63900000 | -4.21700000 |
| H  | -4.62600000 | 0.24100000  | -0.61500000 |
| H  | -0.96900000 | -0.95600000 | -2.32600000 |
| C  | 7.47300000  | 1.65200000  | -1.49400000 |
| H  | 8.47700000  | 2.07800000  | -1.60300000 |
| H  | 7.39500000  | 0.77900000  | -2.14900000 |
| H  | 6.75100000  | 2.39800000  | -1.84400000 |
| C  | 7.20900000  | 1.26100000  | -0.04000000 |
| H  | 7.26800000  | 2.13500000  | 0.61900000  |
| H  | 7.98400000  | 0.56200000  | 0.30500000  |
| C  | 5.86100000  | 0.56300000  | 0.13700000  |
| N  | 5.29600000  | 0.68200000  | 1.36400000  |
| O  | 5.34000000  | -0.08400000 | -0.77300000 |

|   |            |            |            |
|---|------------|------------|------------|
| H | 4.40100000 | 0.23900000 | 1.55100000 |
| H | 5.72000000 | 1.23500000 | 2.09600000 |

**HO-Fe<sup>IV</sup>=O attacks Model 1 (including O-C2 pathway)**

NBZ-FeIV-RC-model1:

|    |             |             |             |
|----|-------------|-------------|-------------|
| C  | -2.15154700 | -1.20674200 | 4.32176200  |
| N  | -2.75665000 | -1.12974700 | 3.07783100  |
| H  | -3.72714600 | -1.34083500 | 2.87954800  |
| C  | -1.83207400 | -0.74405500 | 2.16596000  |
| H  | -2.02701400 | -0.62874400 | 1.10952100  |
| N  | -0.66187200 | -0.56098200 | 2.75368900  |
| C  | -0.84545300 | -0.84756800 | 4.09199200  |
| H  | -0.02945400 | -0.78362800 | 4.79693400  |
| C  | 1.35696600  | 3.46434700  | 3.73514300  |
| N  | 2.69999300  | 3.12359500  | 3.73522700  |
| H  | 3.45567200  | 3.69711100  | 4.08951000  |
| C  | 2.84204900  | 1.90644700  | 3.16223000  |
| H  | 3.78507100  | 1.41088900  | 2.99849600  |
| N  | 1.66118700  | 1.43475300  | 2.79611500  |
| C  | 0.73048700  | 2.39621000  | 3.14398800  |
| H  | -0.31992200 | 2.25892100  | 2.93980900  |
| C  | 3.40516000  | -1.33217900 | 2.42816200  |
| O  | 2.25232700  | -1.44683000 | 2.96968200  |
| O  | 3.60418600  | -0.49434000 | 1.50620800  |
| C  | -1.98993700 | 1.78526200  | -3.14225000 |
| C  | -1.84388800 | 2.77602900  | -4.11040400 |
| C  | -0.71346500 | 2.79378300  | -4.93400700 |
| C  | 0.28001200  | 1.81959200  | -4.79294700 |
| C  | 0.14867400  | 0.81901100  | -3.83270100 |
| C  | -0.98705000 | 0.82132000  | -3.02071000 |
| N  | -1.13476100 | -0.22773600 | -2.01193500 |
| O  | -0.28640000 | -1.12415700 | -1.98339900 |
| O  | -2.10632700 | -0.17502800 | -1.25669500 |
| H  | -2.85571200 | 1.75286400  | -2.49254100 |
| H  | -2.61311100 | 3.53412200  | -4.22172900 |
| H  | -0.60551900 | 3.56983500  | -5.68635800 |
| H  | 1.15851500  | 1.83695000  | -5.43053900 |
| H  | 0.90520400  | 0.05506700  | -3.70366900 |
| O  | 0.63945600  | 0.70065500  | 0.41989500  |
| O  | 1.05839200  | -1.78881500 | 0.62148000  |
| H  | 0.62457300  | -1.54700700 | -0.21708000 |
| H  | 5.49500800  | -1.85880500 | 2.60632700  |
| H  | 4.46979400  | -2.41657700 | 3.96809000  |
| H  | 4.38464600  | -3.23067500 | 2.40002800  |
| Fe | 1.24209200  | -0.27929700 | 1.58645000  |
| C  | 4.51604800  | -2.25595000 | 2.88653900  |
| C  | 0.84391200  | 4.75725400  | 4.27997300  |
| H  | 1.06351900  | 4.86583200  | 5.34974200  |

|   |             |             |            |
|---|-------------|-------------|------------|
| H | 1.28597900  | 5.61775000  | 3.76213700 |
| H | -0.24095200 | 4.80935900  | 4.15217600 |
| H | -3.71829000 | -0.93018600 | 5.77866800 |
| H | -3.30396700 | -2.62364300 | 5.46698200 |
| H | -2.20812400 | -1.60486700 | 6.41392600 |
| C | -2.88737300 | -1.61223800 | 5.55664100 |

NBZ-FeIV-O-C1-TS-modell:

|    |              |             |            |
|----|--------------|-------------|------------|
| C  | -31.12054700 | 11.14017100 | 7.95193400 |
| N  | -31.71961900 | 11.47108100 | 6.74793300 |
| H  | -32.71615500 | 11.48113000 | 6.56731000 |
| C  | -30.75414400 | 11.77806200 | 5.85083500 |
| H  | -30.93940600 | 12.09571200 | 4.83683500 |
| N  | -29.55681600 | 11.66558700 | 6.40333900 |
| C  | -29.77199800 | 11.26474400 | 7.70967100 |
| H  | -28.94925400 | 11.09558000 | 8.38983900 |
| C  | -27.70452100 | 15.82373200 | 7.46915200 |
| N  | -26.41354400 | 15.37168600 | 7.70595500 |
| H  | -25.71780900 | 15.84151600 | 8.27283400 |
| C  | -26.22468400 | 14.20773100 | 7.04777600 |
| H  | -25.30121200 | 13.65182800 | 7.01860200 |
| N  | -27.32985000 | 13.87611600 | 6.39398200 |
| C  | -28.25541300 | 14.87598100 | 6.64601800 |
| H  | -29.23524200 | 14.85107200 | 6.19862100 |
| C  | -25.23054900 | 11.10329800 | 6.03259800 |
| O  | -26.51253300 | 11.06303800 | 6.28067700 |
| O  | -24.65035800 | 12.05024200 | 5.48718200 |
| C  | -28.50147400 | 13.23755900 | 1.65318700 |
| C  | -27.37584300 | 12.77477300 | 1.00118100 |
| C  | -26.09922000 | 13.24674600 | 1.35066500 |
| C  | -25.96368500 | 14.22087200 | 2.35541500 |
| C  | -27.07374200 | 14.71230400 | 3.01737000 |
| C  | -28.36197500 | 14.14085500 | 2.75707200 |
| N  | -29.54247600 | 15.04836900 | 3.00012700 |
| O  | -29.35175400 | 16.09145100 | 3.62204000 |
| O  | -30.63378600 | 14.69705600 | 2.55990500 |
| H  | -29.49498700 | 12.90512500 | 1.38077500 |
| H  | -27.48398100 | 12.04992000 | 0.19929900 |
| H  | -25.22110600 | 12.88231900 | 0.82588700 |
| H  | -24.98059300 | 14.61361700 | 2.59920800 |
| H  | -26.99326700 | 15.49520500 | 3.75986400 |
| O  | -28.82493500 | 13.17492700 | 4.21563900 |
| O  | -27.63883900 | 10.89445500 | 3.95558000 |
| H  | -27.13145800 | 10.19832600 | 4.40822900 |
| H  | -23.38344300 | 10.05406700 | 6.46196300 |
| H  | -24.79117200 | 9.46838800  | 7.40567700 |
| H  | -24.64423400 | 9.06118900  | 5.69315600 |
| Fe | -27.70736900 | 12.21075300 | 5.18352300 |
| C  | -24.45600800 | 9.84800700  | 6.43499900 |

|   |              |             |            |
|---|--------------|-------------|------------|
| C | -28.24600000 | 17.09400000 | 8.04400100 |
| H | -28.25277300 | 17.07275200 | 9.14114700 |
| H | -27.65467800 | 17.96390000 | 7.73198400 |
| H | -29.27361400 | 17.24518300 | 7.70230000 |
| H | -32.59559900 | 11.56677500 | 9.46649300 |
| H | -32.52127000 | 9.86448100  | 8.98447600 |
| H | -31.24440200 | 10.55311400 | 9.99956900 |
| C | -31.91499500 | 10.76200000 | 9.16099500 |

NBZ-FeIV-O-C2-TS1-modell1:

|   |             |             |             |
|---|-------------|-------------|-------------|
| C | -2.17431800 | -1.13163000 | 4.33638500  |
| N | -2.83558500 | -0.62185200 | 3.23082400  |
| H | -3.83939700 | -0.52630000 | 3.13510700  |
| C | -1.91960100 | -0.27867000 | 2.29510800  |
| H | -2.16318900 | 0.14221100  | 1.33177000  |
| N | -0.69984800 | -0.53393600 | 2.73850800  |
| C | -0.84334800 | -1.06750800 | 4.00448200  |
| H | 0.01756900  | -1.37533100 | 4.57872400  |
| C | 1.33954900  | 3.47012700  | 3.70359600  |
| N | 2.68327100  | 3.18637300  | 3.52588100  |
| H | 3.45376800  | 3.80172600  | 3.75674300  |
| C | 2.79815000  | 1.95598400  | 2.97153500  |
| H | 3.73394300  | 1.49328400  | 2.70115400  |
| N | 1.60307100  | 1.42152200  | 2.78205200  |
| C | 0.68943400  | 2.35602800  | 3.23299100  |
| H | -0.37276500 | 2.17077700  | 3.18923000  |
| C | 3.29721700  | -1.43871400 | 2.51324800  |
| O | 2.20956700  | -1.58592500 | 3.14796400  |
| O | 3.35650500  | -0.63957600 | 1.52258700  |
| C | -0.69998800 | 3.39279100  | -1.07447500 |
| C | -1.83492800 | 2.73700400  | -1.55225300 |
| C | -1.73854400 | 1.41441200  | -2.03431100 |
| C | -0.53329700 | 0.74027300  | -2.00308000 |
| C | 0.63106100  | 1.33327600  | -1.40512700 |
| C | 0.51683100  | 2.71985600  | -1.06989800 |
| N | 1.71745200  | 3.43386700  | -0.68207600 |
| O | 2.80974800  | 2.88841100  | -0.87767000 |
| O | 1.59726800  | 4.56542900  | -0.19461900 |
| H | -0.74342800 | 4.42271400  | -0.74177500 |
| H | -2.78597500 | 3.25990500  | -1.57993800 |
| H | -2.61730200 | 0.93215500  | -2.45384700 |
| H | -0.45534700 | -0.27404300 | -2.38215200 |
| H | 1.60942700  | 0.96249800  | -1.67859300 |
| O | 0.63249300  | 0.52212200  | 0.22404200  |
| O | 0.90548100  | -2.07844200 | 0.73193100  |
| H | 0.61328300  | -1.87225700 | -0.17064500 |
| H | 5.43647200  | -1.71229100 | 2.65551200  |
| H | 4.49484000  | -2.52952200 | 3.94503200  |
| H | 4.51070700  | -3.18011600 | 2.29464600  |

|    |             |             |            |
|----|-------------|-------------|------------|
| Fe | 1.16373000  | -0.44462600 | 1.57592700 |
| C  | 4.51604300  | -2.25594400 | 2.88653900 |
| C  | 0.84391400  | 4.75724700  | 4.27997300 |
| H  | 1.22074500  | 4.92229000  | 5.29733500 |
| H  | 1.14802900  | 5.61754300  | 3.67038800 |
| H  | -0.24895800 | 4.74732100  | 4.32400100 |
| H  | -3.47449800 | -0.81298400 | 6.02658600 |
| H  | -3.57359000 | -2.43718600 | 5.32694400 |
| H  | -2.16258500 | -1.97388500 | 6.29143200 |
| C  | -2.88737300 | -1.61223800 | 5.55664100 |

NBZ-FeIV-O-C2-INT1-modell1:

|   |             |             |             |
|---|-------------|-------------|-------------|
| C | -2.90050000 | -1.94545600 | 2.73604900  |
| N | -3.56112000 | -1.38066000 | 1.65693300  |
| H | -4.56085600 | -1.23361300 | 1.58565800  |
| C | -2.65161400 | -1.05929300 | 0.70844500  |
| H | -2.89575800 | -0.60163900 | -0.23802900 |
| N | -1.43626500 | -1.38363400 | 1.11908600  |
| C | -1.57634000 | -1.93819000 | 2.37659400  |
| H | -0.71844300 | -2.29784000 | 2.92425400  |
| C | 0.61450400  | 2.66919200  | 2.08316800  |
| N | 1.92005100  | 2.47463000  | 1.66456400  |
| H | 2.66798500  | 3.15441000  | 1.72654000  |
| C | 2.02717800  | 1.22566000  | 1.14750700  |
| H | 2.93516100  | 0.81283900  | 0.73626500  |
| N | 0.86675100  | 0.59468400  | 1.20796700  |
| C | -0.01688700 | 1.48501900  | 1.78950400  |
| H | -1.05150800 | 1.22546300  | 1.95509500  |
| C | 2.54478900  | -2.29720700 | 0.92771500  |
| O | 1.47412700  | -2.47541600 | 1.57610800  |
| O | 2.55762100  | -1.51315000 | -0.08244300 |
| C | -1.69299000 | 0.49174600  | -4.33525600 |
| C | -1.49164500 | -0.76350900 | -4.93381300 |
| C | -0.38373900 | -1.57470300 | -4.55866300 |
| C | 0.47759600  | -1.17009000 | -3.57935100 |
| C | 0.27440900  | 0.08828600  | -2.77032400 |
| C | -0.82302200 | 0.93473200  | -3.36464700 |
| N | -0.98823600 | 2.26064600  | -2.82968500 |
| O | -0.08273600 | 2.71249400  | -2.11403900 |
| O | -2.01242600 | 2.90199800  | -3.11938000 |
| H | -2.51198800 | 1.12854900  | -4.64946300 |
| H | -2.17609600 | -1.10273600 | -5.70492600 |
| H | -0.22540100 | -2.52052200 | -5.07053800 |
| H | 1.32492000  | -1.78732300 | -3.29456400 |
| H | 1.20961500  | 0.66862400  | -2.75194100 |
| O | -0.08783000 | -0.23817600 | -1.44178300 |
| O | 0.11220400  | -3.00177300 | -0.86775100 |
| H | -0.23703300 | -2.83907900 | -1.75950500 |
| H | 4.69486600  | -2.47145700 | 1.07072800  |

|    |             |             |             |
|----|-------------|-------------|-------------|
| H  | 3.78895400  | -3.33914100 | 2.35249400  |
| H  | 3.83896400  | -3.97720400 | 0.69699400  |
| Fe | 0.40010000  | -1.35386800 | -0.03047100 |
| C  | 3.79988200  | -3.05843500 | 1.29606700  |
| C  | 0.12900800  | 3.94811000  | 2.68727700  |
| H  | 0.67257600  | 4.20006600  | 3.60690600  |
| H  | 0.24276000  | 4.79136700  | 1.99418300  |
| H  | -0.93227000 | 3.86141400  | 2.93725400  |
| H  | -4.15124300 | -1.60808400 | 4.45817200  |
| H  | -4.32164000 | -3.21709700 | 3.73828800  |
| H  | -2.87414800 | -2.81642400 | 4.67653400  |
| C  | -3.60236100 | -2.41956700 | 3.96367000  |

NBZ-FeIV-O-C2-TS2-modell1:

|    |             |             |             |
|----|-------------|-------------|-------------|
| C  | -2.84323300 | -2.04564100 | 2.87908200  |
| N  | -3.15490100 | -2.71726500 | 1.70944600  |
| H  | -3.90652600 | -3.38648900 | 1.59722700  |
| C  | -2.27361800 | -2.34878900 | 0.74880400  |
| H  | -2.25128800 | -2.74354400 | -0.25488800 |
| N  | -1.41397800 | -1.46564800 | 1.22859100  |
| C  | -1.75737800 | -1.26991000 | 2.55233400  |
| H  | -1.19884300 | -0.59678900 | 3.18640500  |
| C  | 0.59970100  | 2.83206700  | 2.33181100  |
| N  | 1.93426500  | 2.46252500  | 2.29417200  |
| H  | 2.71038300  | 3.01886200  | 2.63138800  |
| C  | 2.03463600  | 1.25170200  | 1.69972700  |
| H  | 2.96215900  | 0.73647900  | 1.50755800  |
| N  | 0.83652000  | 0.80567800  | 1.35475900  |
| C  | -0.06346000 | 1.78393100  | 1.74308800  |
| H  | -1.12207000 | 1.67605300  | 1.55981500  |
| C  | 2.55894200  | -2.13323200 | 0.98034000  |
| O  | 1.41805300  | -2.48170900 | 1.41491800  |
| O  | 2.67594100  | -1.19287200 | 0.13344500  |
| O  | 0.07842200  | -2.26661000 | -1.27241800 |
| H  | 0.46870800  | -3.11025900 | -0.99247700 |
| H  | 4.67352500  | -2.60137200 | 0.90056900  |
| H  | 3.97857800  | -2.53596300 | 2.53896000  |
| H  | 3.63194800  | -3.92533700 | 1.50634900  |
| Fe | 0.44049800  | -0.99348700 | 0.06376900  |
| C  | 3.79352600  | -2.84248800 | 1.50173400  |
| C  | 0.13468200  | 4.13340000  | 2.89867300  |
| H  | 0.38881500  | 4.23149700  | 3.96183100  |
| H  | 0.58187000  | 4.98593400  | 2.37199600  |
| H  | -0.95205400 | 4.21333200  | 2.80480200  |
| H  | -4.65777500 | -2.01862600 | 4.04644600  |
| H  | -3.51440700 | -3.29112700 | 4.50228300  |
| H  | -3.18235600 | -1.60655700 | 4.93581600  |
| C  | -3.59093500 | -2.25311800 | 4.15380500  |
| C  | -1.06437900 | 2.76964300  | -2.32563600 |



|   |             |             |             |
|---|-------------|-------------|-------------|
| C | -2.38866900 | 2.61335600  | -2.61805500 |
| C | -2.94547900 | 1.31911400  | -2.95247200 |
| C | -2.18376400 | 0.20143400  | -2.93194600 |
| C | -0.77028000 | 0.25236200  | -2.46569400 |
| C | -0.22154400 | 1.61720600  | -2.31155800 |
| N | 1.21091900  | 1.78525500  | -2.25527900 |
| O | 1.91860000  | 0.77476200  | -2.35838200 |
| O | 1.65529800  | 2.93519600  | -2.09565900 |
| H | -0.62940700 | 3.73864700  | -2.11673000 |
| H | -3.03927200 | 3.48293700  | -2.63627300 |
| H | -3.98397000 | 1.27151100  | -3.26963800 |
| H | -2.57187800 | -0.75730000 | -3.26369400 |
| H | -0.11843000 | -0.51584300 | -2.87236300 |
| O | -0.58333300 | 0.40550800  | -1.03536200 |

NBZ-FeIV-O-C2-INT2-modell1:

|    |             |             |             |
|----|-------------|-------------|-------------|
| C  | -2.88886600 | -1.81263200 | 2.73947800  |
| N  | -3.55683400 | -1.21593600 | 1.68378100  |
| H  | -4.55309700 | -1.03947600 | 1.63820100  |
| C  | -2.65923300 | -0.91217900 | 0.71402000  |
| H  | -2.91751400 | -0.42023200 | -0.21291300 |
| N  | -1.44307400 | -1.28251300 | 1.08477500  |
| C  | -1.57556500 | -1.84863700 | 2.33988500  |
| H  | -0.71826100 | -2.24344700 | 2.86567700  |
| C  | 0.61880800  | 2.93285800  | 1.98365400  |
| N  | 1.90576200  | 2.79339100  | 1.48925500  |
| H  | 2.64920800  | 3.47578100  | 1.57657000  |
| C  | 2.00536300  | 1.59666000  | 0.86723600  |
| H  | 2.90339200  | 1.21581600  | 0.40576500  |
| N  | 0.85083600  | 0.94920200  | 0.93014000  |
| C  | -0.01708200 | 1.77281800  | 1.62327800  |
| H  | -1.03748000 | 1.48008400  | 1.81862000  |
| C  | 2.68127500  | -2.11346500 | 0.76089700  |
| O  | 1.51920200  | -2.36725500 | 1.24070100  |
| O  | 2.84394500  | -1.26238800 | -0.15385600 |
| O  | -0.04115800 | -1.13965600 | -1.77536500 |
| H  | 0.72404800  | -1.12062700 | -2.37080600 |
| H  | 4.77821300  | -2.65668000 | 0.77158500  |
| H  | 4.02239100  | -2.54708900 | 2.38303300  |
| H  | 3.66872300  | -3.93448300 | 1.35235900  |
| Fe | 0.48440800  | -0.99369700 | 0.03155500  |
| C  | 3.86844600  | -2.85749000 | 1.34219900  |
| C  | 0.15944600  | 4.13301200  | 2.74017000  |
| H  | 0.73632100  | 4.27657100  | 3.66296700  |
| H  | 0.25275900  | 5.05058100  | 2.14549000  |
| H  | -0.89256200 | 4.01793400  | 3.01600400  |
| H  | -4.05953300 | -1.40795100 | 4.50303200  |
| H  | -4.34362600 | -3.00563300 | 3.79660600  |

|   |             |             |             |
|---|-------------|-------------|-------------|
| H | -2.84406700 | -2.68381200 | 4.68210500  |
| C | -3.57313200 | -2.24899300 | 3.99237600  |
| C | -4.09644400 | 1.20523000  | -4.59495300 |
| C | -4.31785000 | 0.27279400  | -5.54949200 |
| C | -3.67248600 | -1.02697500 | -5.52196800 |
| C | -2.80313700 | -1.37236700 | -4.54187000 |
| C | -2.60226900 | -0.51451800 | -3.36891100 |
| C | -3.32622200 | 0.81644700  | -3.40530100 |
| N | -2.68311200 | 1.95716000  | -2.66280900 |
| O | -2.48592300 | 1.83677800  | -1.46008600 |
| O | -2.38238500 | 2.93685300  | -3.34152800 |
| H | -4.46235000 | 2.22185000  | -4.67858900 |
| H | -4.92821000 | 0.52448800  | -6.41240000 |
| H | -3.82488300 | -1.68883000 | -6.37024300 |
| H | -2.19453100 | -2.26915800 | -4.61680500 |
| H | -1.69539100 | -0.62549200 | -2.76251900 |
| O | -3.79227500 | -0.20004500 | -2.57549100 |

NBZ-FeIV-O-C2-TS3-modell1:

|    |              |             |             |
|----|--------------|-------------|-------------|
| C  | -21.34157800 | 32.04631800 | -0.10801400 |
| H  | -20.77409500 | 31.11555400 | -0.19615400 |
| H  | -21.39174100 | 32.30994500 | 0.95614900  |
| C  | -22.70085000 | 31.86807300 | -0.69995600 |
| N  | -23.64121800 | 32.88461000 | -0.74481000 |
| H  | -23.51002000 | 33.82561800 | -0.39420600 |
| C  | -24.76204200 | 32.41335700 | -1.34096600 |
| H  | -25.65767900 | 32.99442400 | -1.49952400 |
| N  | -24.60273600 | 31.14610900 | -1.68350100 |
| C  | -23.32507800 | 30.79528800 | -1.28856800 |
| H  | -22.94628200 | 29.79664700 | -1.45182000 |
| C  | -24.18516500 | 32.22570400 | -7.49335000 |
| H  | -23.13904600 | 32.28717000 | -7.17991700 |
| H  | -24.53093000 | 33.24358700 | -7.71537300 |
| C  | -25.00163600 | 31.58588600 | -6.41847000 |
| N  | -26.36560800 | 31.37147400 | -6.53729300 |
| H  | -26.93319600 | 31.60487800 | -7.34279100 |
| C  | -26.81364400 | 30.78755500 | -5.40043600 |
| H  | -27.84364800 | 30.52343100 | -5.21564800 |
| N  | -25.81840700 | 30.61127100 | -4.54801700 |
| C  | -24.68607800 | 31.10099700 | -5.17248200 |
| H  | -23.72062200 | 31.07755600 | -4.68775000 |
| C  | -25.41724200 | 25.96338100 | -3.87731400 |
| H  | -25.32756500 | 25.33968800 | -2.97859700 |
| H  | -24.46842500 | 25.89685900 | -4.41927600 |
| C  | -25.69759200 | 27.39862600 | -3.45838100 |
| O  | -26.88398900 | 27.84004400 | -3.50550600 |
| O  | -24.73240000 | 28.10922500 | -3.02921000 |
| Fe | -26.10934600 | 29.75080200 | -2.49419200 |
| C  | -29.84362800 | 32.57166700 | -2.62472400 |

|   |              |             |             |
|---|--------------|-------------|-------------|
| C | -29.98148000 | 33.65806100 | -1.83211400 |
| C | -29.38317800 | 33.70487000 | -0.51747800 |
| C | -28.67807400 | 32.64026000 | -0.00611500 |
| C | -28.56758100 | 31.44702000 | -0.75413400 |
| C | -29.00473700 | 31.41638700 | -2.15671500 |
| N | -29.73282900 | 30.10287000 | -2.57733500 |
| O | -30.31698600 | 29.46259800 | -1.71125200 |
| O | -29.71320900 | 29.83085900 | -3.77448100 |
| H | -30.29654700 | 32.51430800 | -3.61001400 |
| H | -30.55041600 | 34.51762600 | -2.17455800 |
| H | -29.50553600 | 34.60862200 | 0.07330300  |
| H | -28.23599400 | 32.68794300 | 0.98438700  |
| H | -28.06011200 | 30.53877900 | -0.41288400 |
| O | -27.69276800 | 31.43359300 | -2.53105100 |
| O | -26.84314700 | 29.10524500 | -0.84884900 |
| H | -27.34861100 | 28.30485900 | -1.06345000 |
| H | -26.22786900 | 25.56704800 | -4.49425600 |
| H | -24.22226000 | 31.65311400 | -8.42895800 |
| H | -20.77521200 | 32.83590800 | -0.61818100 |

NBZ-FeIV-O-C2-INT3-modell1: (from TS3-IRC)

|   |             |             |             |
|---|-------------|-------------|-------------|
| C | 5.11100000  | 1.38500000  | 2.62400000  |
| H | 5.71000000  | 0.47600000  | 2.52200000  |
| H | 5.03200000  | 1.61900000  | 3.69300000  |
| C | 3.76700000  | 1.17600000  | 2.00600000  |
| N | 2.78900000  | 2.15900000  | 1.98600000  |
| H | 2.87800000  | 3.09000000  | 2.37400000  |
| C | 1.69000000  | 1.67000000  | 1.37300000  |
| H | 0.77400000  | 2.22300000  | 1.23000000  |
| N | 1.90100000  | 0.41900000  | 0.99000000  |
| C | 3.18900000  | 0.10000000  | 1.37900000  |
| H | 3.60300000  | -0.87900000 | 1.18900000  |
| C | 2.27800000  | 1.56100000  | -4.74900000 |
| H | 3.34400000  | 1.43600000  | -4.53700000 |
| H | 2.07500000  | 2.63600000  | -4.83500000 |
| C | 1.46400000  | 0.93300000  | -3.66200000 |
| N | 0.07800000  | 0.95900000  | -3.66200000 |
| H | -0.50400000 | 1.36600000  | -4.38400000 |
| C | -0.36900000 | 0.34700000  | -2.54100000 |
| H | -1.41100000 | 0.24300000  | -2.28100000 |
| N | 0.64700000  | -0.08300000 | -1.81100000 |
| C | 1.79200000  | 0.27100000  | -2.50300000 |
| H | 2.77500000  | 0.03600000  | -2.12100000 |
| C | 1.04500000  | -4.66000000 | -1.13900000 |
| H | 0.80400000  | -5.31100000 | -0.28900000 |
| H | 2.06800000  | -4.86500000 | -1.46100000 |
| C | 0.88800000  | -3.21700000 | -0.70900000 |
| O | -0.29900000 | -2.75300000 | -0.55200000 |
| O | 1.88700000  | -2.49200000 | -0.45400000 |

|    |             |             |             |
|----|-------------|-------------|-------------|
| Fe | 0.36300000  | -0.94300000 | 0.31200000  |
| C  | -3.06000000 | 1.58200000  | 0.70100000  |
| C  | -4.16300000 | 1.92900000  | 1.48200000  |
| C  | -4.44200000 | 1.23300000  | 2.66100000  |
| C  | -3.59500000 | 0.18700000  | 3.05400000  |
| C  | -2.48700000 | -0.16700000 | 2.29000000  |
| C  | -2.19200000 | 0.52900000  | 1.09200000  |
| N  | -4.25700000 | -0.65400000 | -0.82600000 |
| O  | -5.29700000 | -1.08600000 | -0.39600000 |
| O  | -3.84100000 | -0.56500000 | -1.95900000 |
| H  | -2.83400000 | 2.12200000  | -0.21500000 |
| H  | -4.80900000 | 2.74300000  | 1.16400000  |
| H  | -5.30400000 | 1.49900000  | 3.26700000  |
| H  | -3.80300000 | -0.35900000 | 3.97200000  |
| H  | -1.81200000 | -0.95800000 | 2.59800000  |
| O  | -1.14700000 | 0.24600000  | 0.32600000  |
| O  | 0.27500000  | -1.74400000 | 1.99900000  |
| H  | -0.16500000 | -2.60700000 | 1.91600000  |
| H  | 0.34300000  | -4.89800000 | -1.94500000 |
| H  | 2.07400000  | 1.10600000  | -5.72700000 |
| H  | 5.65700000  | 2.20500000  | 2.14200000  |

NBZ-FeIV-O-C2-TS4-model1:

|   |             |             |            |
|---|-------------|-------------|------------|
| C | -3.11792400 | -2.66485300 | 3.27716200 |
| N | -3.53968300 | -3.16369100 | 2.05533700 |
| H | -4.38701800 | -3.69472900 | 1.89445100 |
| C | -2.62371800 | -2.83599100 | 1.11315700 |
| H | -2.68996300 | -3.12221300 | 0.07474300 |
| N | -1.63540900 | -2.14419800 | 1.65571600 |
| C | -1.93180500 | -2.03373800 | 3.00097700 |
| H | -1.27202900 | -1.51759400 | 3.68284600 |
| C | 0.27656300  | 2.12546400  | 2.87986400 |
| N | 1.62862300  | 1.83693700  | 2.78440600 |
| H | 2.38299400  | 2.42977100  | 3.10854500 |
| C | 1.77513900  | 0.64139100  | 2.16566900 |
| H | 2.72526500  | 0.18133400  | 1.94063900 |
| N | 0.59278500  | 0.13398900  | 1.85758900 |
| C | -0.34592400 | 1.05081700  | 2.29590600 |
| H | -1.40380800 | 0.88146600  | 2.15923700 |
| C | 2.41686300  | -2.84129200 | 1.38112900 |
| O | 1.26397400  | -2.99988200 | 1.90989300 |
| O | 2.60586600  | -2.00653200 | 0.45441500 |
| H | 4.47074900  | -3.53575200 | 1.32752300 |
| H | 3.75111300  | -3.44808100 | 2.95781600 |
| H | 3.27903200  | -4.75353700 | 1.87039200 |
| C | 3.55800200  | -3.69471900 | 1.90684400 |
| C | -0.25290500 | 3.37816900  | 3.49753900 |
| H | 0.05977400  | 3.48251900  | 4.54425900 |

|    |             |             |             |
|----|-------------|-------------|-------------|
| H  | 0.08921900  | 4.27156900  | 2.95978800  |
| H  | -1.34630300 | 3.37003600  | 3.47245900  |
| H  | -4.88589300 | -2.46143700 | 4.49684700  |
| H  | -3.94914900 | -3.93061600 | 4.80815400  |
| H  | -3.34761400 | -2.36270500 | 5.37014000  |
| C  | -3.86744300 | -2.86683800 | 4.55047100  |
| C  | -1.90897800 | -0.47818000 | -2.58880800 |
| C  | -2.22900500 | -1.07813300 | -3.78183600 |
| C  | -1.30813900 | -1.93964300 | -4.44670900 |
| C  | -0.05538300 | -2.16754800 | -3.91682600 |
| C  | 0.31917900  | -1.54690800 | -2.70557600 |
| C  | -0.62532900 | -0.70733000 | -1.97810400 |
| N  | 0.78111600  | 0.71400000  | -3.78807300 |
| O  | 0.36780800  | 0.91339800  | -4.91412300 |
| O  | 1.58774400  | 1.37327100  | -3.15854400 |
| H  | -2.61350100 | 0.16134600  | -2.06439500 |
| H  | -3.20313200 | -0.90284200 | -4.23154200 |
| H  | -1.59735200 | -2.39964800 | -5.38735000 |
| H  | 0.66170200  | -2.79484800 | -4.43883900 |
| H  | 1.33781600  | -1.58742000 | -2.34574100 |
| O  | -0.33584400 | -0.24578900 | -0.82708400 |
| O  | -0.00393300 | -2.90841500 | -0.87339200 |
| H  | 0.81355200  | -3.42890800 | -0.96291600 |
| Fe | 0.24898900  | -1.64181500 | 0.64389300  |

NBZ-FeIV-O-C2-PC-modell1:

|   |             |             |             |
|---|-------------|-------------|-------------|
| C | -3.16944000 | -1.26973200 | 2.85817400  |
| N | -3.46989400 | -1.84665400 | 1.63606900  |
| H | -4.30993600 | -2.37052600 | 1.42225900  |
| C | -2.45270000 | -1.60049700 | 0.77714200  |
| H | -2.42437400 | -1.94903300 | -0.24367300 |
| N | -1.50817800 | -0.88888600 | 1.37119900  |
| C | -1.94383000 | -0.68053800 | 2.66782800  |
| H | -1.34968400 | -0.12559100 | 3.37928500  |
| C | 0.53466400  | 3.50706600  | 2.67766100  |
| N | 1.86180300  | 3.25997100  | 2.36760100  |
| H | 2.63905800  | 3.87878000  | 2.56478400  |
| C | 1.94740200  | 2.06538500  | 1.73907400  |
| H | 2.86112000  | 1.62670400  | 1.36808400  |
| N | 0.74740800  | 1.51555400  | 1.62951500  |
| C | -0.13881900 | 2.40674400  | 2.20872500  |
| H | -1.19932500 | 2.20383100  | 2.24471600  |
| C | 2.63825100  | -1.43327400 | 1.01487700  |
| O | 1.47656700  | -1.77794300 | 1.43559000  |
| O | 2.78071600  | -0.48924100 | 0.19486500  |
| H | 4.73566000  | -1.97087500 | 0.96164900  |
| H | 4.02983500  | -1.86020600 | 2.59153300  |
| H | 3.65084900  | -3.25554900 | 1.57958000  |
| C | 3.84368900  | -2.17807400 | 1.55779300  |

|    |             |             |             |
|----|-------------|-------------|-------------|
| C  | 0.08181600  | 4.74766100  | 3.37244500  |
| H  | 0.55471000  | 4.85823900  | 4.35673400  |
| H  | 0.31683900  | 5.64740800  | 2.78969500  |
| H  | -1.00129300 | 4.71822500  | 3.52128100  |
| H  | -5.04569300 | -0.86088200 | 3.83771500  |
| H  | -4.28629500 | -2.38393900 | 4.32637600  |
| H  | -3.62428400 | -0.84212700 | 4.89467500  |
| C  | -4.08130200 | -1.34526500 | 4.03778600  |
| C  | -1.62296200 | 0.20830200  | -3.02065200 |
| C  | -2.05590700 | -0.72360500 | -3.88691100 |
| C  | -1.21048700 | -1.85449000 | -4.27664100 |
| C  | -0.04843400 | -2.10922600 | -3.65116200 |
| C  | 0.42549900  | -1.26018100 | -2.50307400 |
| C  | -0.25193700 | 0.13718100  | -2.40595400 |
| N  | 0.70131600  | 1.09313000  | -3.42386200 |
| O  | 0.13077400  | 1.95393900  | -4.08851600 |
| O  | 1.92302700  | 0.98058200  | -3.35395300 |
| H  | -2.23995100 | 1.04622800  | -2.71173700 |
| H  | -3.05275700 | -0.65692600 | -4.31697400 |
| H  | -1.55929600 | -2.50359300 | -5.07669300 |
| H  | 0.55731600  | -2.97233700 | -3.91895800 |
| H  | 1.50314900  | -1.08553600 | -2.55269800 |
| O  | -0.16093800 | 0.69737900  | -1.20575800 |
| O  | 0.12630000  | -1.92024700 | -1.23997800 |
| H  | 0.84153100  | -2.54779500 | -1.03934800 |
| Fe | 0.38762500  | -0.27561300 | 0.41825000  |

NBZ-FeIV-O1-C2-TS-modell1:

|   |              |             |            |
|---|--------------|-------------|------------|
| C | -31.14848900 | 11.14218600 | 7.93706500 |
| N | -31.75689400 | 11.39199300 | 6.71736400 |
| H | -32.75163800 | 11.34203200 | 6.53188000 |
| C | -30.80722300 | 11.70829700 | 5.80864200 |
| H | -31.01328800 | 11.92614900 | 4.77073800 |
| N | -29.60935300 | 11.67575700 | 6.37491100 |
| C | -29.80893500 | 11.32401300 | 7.69793700 |
| H | -28.97968300 | 11.22284500 | 8.38233700 |
| C | -27.70923200 | 15.78859300 | 7.54650700 |
| N | -26.36309500 | 15.45867100 | 7.58256800 |
| H | -25.61926900 | 16.04704800 | 7.93820600 |
| C | -26.19926100 | 14.22708200 | 7.04821700 |
| H | -25.24718900 | 13.73668900 | 6.92107200 |
| N | -27.36852400 | 13.73253400 | 6.67296300 |
| C | -28.31417900 | 14.69671600 | 6.97561600 |
| H | -29.35993700 | 14.54830500 | 6.75501700 |
| C | -25.61871600 | 10.77526100 | 6.14970900 |
| O | -26.76162100 | 10.53796000 | 6.66652900 |
| O | -25.48169600 | 11.75209800 | 5.35118500 |
| H | -24.47087400 | 9.03447500  | 5.69852500 |
| H | -23.50427200 | 10.37659800 | 6.33714700 |

|    |              |             |            |
|----|--------------|-------------|------------|
| H  | -24.54468100 | 9.40615000  | 7.43113100 |
| C  | -24.45600700 | 9.84800800  | 6.43500100 |
| C  | -28.24599800 | 17.09399500 | 8.04400000 |
| H  | -28.04838700 | 17.23347000 | 9.11435600 |
| H  | -27.79983600 | 17.94218200 | 7.51012600 |
| H  | -29.32819200 | 17.13160300 | 7.89170200 |
| H  | -32.63155300 | 11.54113100 | 9.45008600 |
| H  | -32.47837200 | 9.83201300  | 9.01364600 |
| H  | -31.22801100 | 10.60936400 | 9.99814100 |
| C  | -31.91499800 | 10.76200100 | 9.16099800 |
| Fe | -27.69033800 | 12.01754300 | 5.36929400 |
| O  | -28.16808200 | 12.96439500 | 4.09282500 |
| C  | -28.29817800 | 9.73139500  | 2.81140400 |
| C  | -27.93675700 | 8.30413000  | 2.84203300 |
| C  | -29.73645500 | 9.95924200  | 2.63546400 |
| H  | -27.67378600 | 10.36580700 | 2.18997600 |
| C  | -28.88602400 | 7.34116000  | 3.07799700 |
| H  | -26.88656600 | 8.04540500  | 2.74275200 |
| C  | -30.68133100 | 8.96978600  | 2.90801000 |
| N  | -30.16460100 | 11.24566300 | 2.20203200 |
| C  | -30.26732100 | 7.66535100  | 3.15604900 |
| H  | -28.58196800 | 6.30091900  | 3.16967800 |
| H  | -31.73436100 | 9.22426200  | 2.86559000 |
| O  | -29.34020700 | 11.99626500 | 1.65574900 |
| O  | -31.36448700 | 11.56842200 | 2.36431500 |
| H  | -31.00048600 | 6.88714400  | 3.34276000 |
| O  | -27.86128800 | 10.28508100 | 4.25758400 |
| H  | -27.84577200 | 9.52494600  | 4.87192700 |
